# Supplementary material for: Asymmetric 1,4-functionalization of 1,3-enynes via dual photoredox and chromium catalysis
Source: PubMed Central journal article supplement (PMC9418150; doi:10.1038/s41467-022-32614-4), 2022-08-26
Supplement: 41467_2022_32614_MOESM1_ESM.pdf [file 41467_2022_32614_MOESM1_ESM.pdf]

## Supplementary Information:

### Asymmetric 1,4-Functionalization of 1,3-Enynes via Dual Photoredox and Chromium Catalysis

**Authors:** Feng-Hua Zhang<sup>1,2,3</sup>, Xiaochong, Guo<sup>1,2,3</sup>, Xianrong Zeng<sup>1,2</sup>, Zhaobin Wang<sup>1,2\*</sup>

**Affiliations:** <sup>1</sup>Key Laboratory of Precise Synthesis of Functional Molecules of Zhejiang Province, School of Science, Westlake University, Hangzhou 310024, Zhejiang Province, China;

<sup>2</sup>Institute of Natural Sciences, Westlake Institute for Advanced Study, Hangzhou 310024, Zhejiang Province, China;

<sup>3</sup> These authors contributed equally to this work

#### Table of Contents

|                                                                         |             |
|-------------------------------------------------------------------------|-------------|
| <b>I. Supplementary Methods</b> .....                                   | <b>S2</b>   |
| <b>1.1 General Information</b> .....                                    | <b>S2</b>   |
| <b>1.2 Preparation of Starting Materials</b> .....                      | <b>S3</b>   |
| <b>1.3 Asymmetric Radical 1,4-functionalization of 1,3-Enynes</b> ..... | <b>S6</b>   |
| <b>1.4 Other Radical Precursors and Synthetic Transformations</b> ..... | <b>S44</b>  |
| <b>1.5 Effect of Reaction Parameters</b> .....                          | <b>S50</b>  |
| <b>1.6 Preliminary Mechanistic Study</b> .....                          | <b>S52</b>  |
| <b>1.7 Assignment of the Absolute Configuration</b> .....               | <b>S57</b>  |
| <b>1.8 NMR Spectra</b> .....                                            | <b>S60</b>  |
| <b>1.9 Stereoselectivity Analysis</b> .....                             | <b>S138</b> |
| <b>II Supplementary References</b> .....                                | <b>S205</b> |

## I. Supplementary Methods

### 1.1 General Information

Unless otherwise noted, reagents were used as received from Sigma-Aldrich, Alfa, TCI, Energy Chemical, J&K. The aldehydes used for the allenylation reaction had been purified by reduced pressure distillation or recrystallization. All reactions were performed under an atmosphere of dry nitrogen gas. Anhydrous THF was purchased from J&K and stored under nitrogen gas. Other solvents were purified with activated aluminum oxide using a solvent-purification system.

NMR spectra were recorded on a Bruker spectrometer with a Prodigy broadband cryoprobe (500 MHz or 600 MHz for  $^1\text{H}$  and 126 MHz or 151 MHz for  $^{13}\text{C}$ ); chemical shifts ( $\delta$ ) are reported in ppm downfield from tetramethylsilane, using the solvent resonance as the internal standard. Optical rotation data were obtained with a Jasco P-2000 polarimeter at 589 nm, using a 50 mm path-length cell in the solvent and at the concentration indicated. High resolution mass spectrometric analysis was performed on ultra-performance liquid chromatography-time-of-flight mass spectrometer (Synapt-G2-Si, Waters, USA) with electron spray ionization (ESI) resource and atmosphere pressure chemical ionization (APCI) resource. SFC analysis was carried out on an Agilent 1260 series system with Daicel CHIRALPAK® or Daicel CHIRALCEL® columns (internal diameter 4.6 mm, column length 250 mm, particle size 5  $\mu\text{m}$ ). HPLC analysis was carried out on Waters Arc HPLC system with Daicel CHIRALPAK® or Daicel CHIRALCEL® columns (internal diameter 4.6 mm, column length 250 mm, particle size 5  $\mu\text{m}$ ). The visible lights (160-440 nm LED, 20 W) were purchased from Kessil (website: <http://kessil.com/science/PR160L.php>).

## 1.2 Preparation of Starting Materials

**Ligand Preparation:** The ligands (*R,S*)-L1 and (*S,R*)-L1 were prepared according to a reported literature procedure, and all the analytical data matched the report (1).

### DHP Esters Preparation:

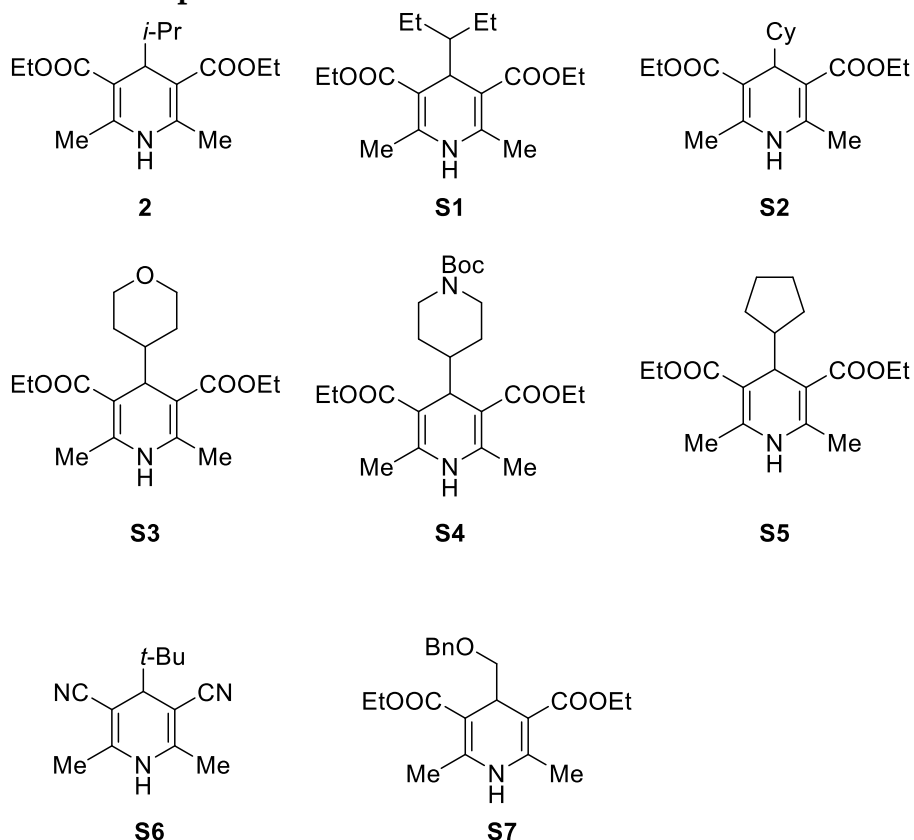

The above DHP esters were prepared according to reported literature procedures, and all the analytical data matched the reports (2).

### General Procedure 1 (GP-1): Preparation of DHP esters

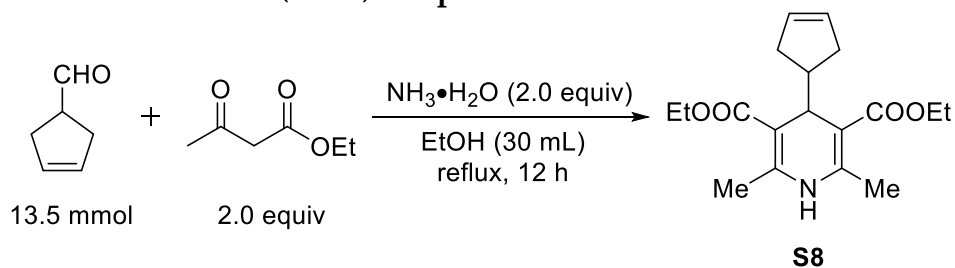

The reaction flask was charged with ethyl acetoacetate (3.5 mL, 27 mmol), cyclopent-3-ene-1-carbaldehyde (1.3 g, 13.5 mmol), and ethanol (30 mL). To the above solution, ammonium hydroxide (1.1 mL, 27 mmol) was added slowly. Then the system was heated to reflux with stirring. After completion of the reaction, as determined by TLC, the solution was cooled, concentrated, and

purified by silica-gel column chromatography (PE/EtOAc) and followed by recrystallization (EtOH/PE) to afford the desired product **S8** as a white solid.

$^1\text{H}$  NMR (500 MHz,  $\text{CDCl}_3$ )  $\delta$  5.68 – 5.59 (m, 3H), 4.26 – 4.08 (m, 5H), 2.30 (s, 6H), 2.24 – 2.05 (m, 5H), 1.30 (t,  $J = 7.1$  Hz, 6H).

$^{13}\text{C}$  NMR (126 MHz,  $\text{CDCl}_3$ )  $\delta$  168.4, 144.6, 130.3, 102.8, 59.6, 46.3, 35.9, 34.5, 19.5, 14.4.

HRMS (ESI)  $m/z$   $[\text{M} + \text{H}]^+$  calcd for  $\text{C}_{18}\text{H}_{26}\text{NO}_4$ : 320.1862, found: 320.1824.

### 1,3-Enynes Preparation:

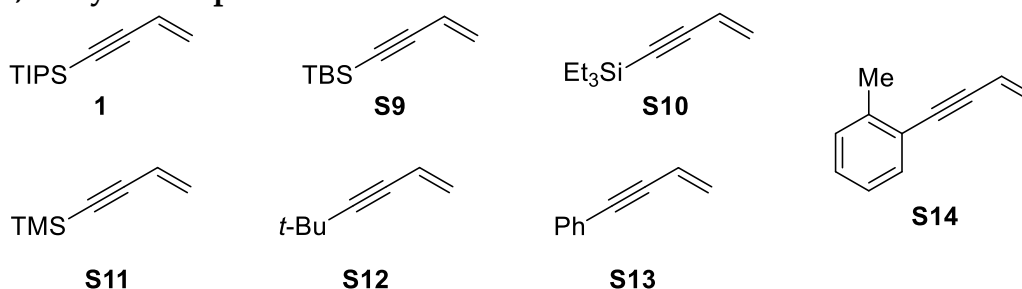

The above 1,3-enynes were prepared according to reported literature procedures, and all the analytical data matched the reports (3).

### General Procedure 2 (GP-2): Preparation of 1,3-enynes

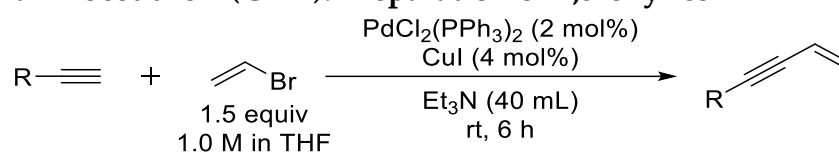

To an oven dried Schlenk flask equipped with a magnetic stir bar was successively added  $\text{PdCl}_2(\text{PPh}_3)_2$  (0.8 mmol, 562 mg.) and  $\text{CuI}$  (1.6 mmol, 305 mg). The system was purged with nitrogen. Dry  $\text{Et}_3\text{N}$  (40 mL) was then added followed by the corresponding alkyne (40 mmol, 1.0 equiv.), vinyl bromide (60 mmol, 1.0 M in THF, 60 mL) via syringe. The reaction mixture was stirred at room temperature for 6 h. After evaporation under vacuum, the residue was purified by flash chromatography over silica gel and distilled under reduced pressure to give the desired 1,3-enynes.

All the yields have not been optimized.

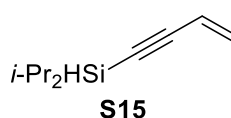

**but-3-en-1-yn-1-yl-diisopropylsilane (S15)**. The title compound was prepared according to the **GP-2**, using ethynyldiisopropylsilane, purified by flash column chromatography: 100% hexanes, 85% yield, colorless liquid.

$^1\text{H}$  NMR (500 MHz,  $\text{CDCl}_3$ )  $\delta$  5.83 (ddd,  $J = 17.6, 11.1, 0.9$  Hz, 1H), 5.71 (dd,



$J = 17.6, 2.3$  Hz, 1H), 5.53 (dd,  $J = 11.1, 2.3$  Hz, 1H), 3.76 (s, 1H), 1.13 – 0.99 (m, 14H).

$^{13}\text{C}$  NMR (126 MHz,  $\text{CDCl}_3$ )  $\delta$  128.3, 117.2, 106.4, 88.8, 18.5, 18.2, 10.8.

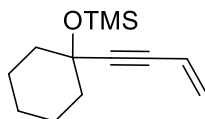

**S16**

**((1-(but-3-en-1-yn-1-yl)cyclohexyl)oxy)trimethylsilane (S16).** The title compound was prepared according to the **GP-2**, using ((1-ethynylcyclohexyl)oxy)trimethylsilane, purified by flash column chromatography: 100% hexanes, 76% yield, colorless liquid.

$^1\text{H}$  NMR (500 MHz,  $\text{CDCl}_3$ )  $\delta$  5.84 (dd,  $J = 17.6, 11.1$  Hz, 1H), 5.60 (dd,  $J = 17.6, 2.1$  Hz, 1H), 5.45 (dd,  $J = 11.1, 2.1$  Hz, 1H), 1.86 – 1.84 (m, 2H), 1.69 – 1.42 (m, 8H), 0.19 (s, 9H).

$^{13}\text{C}$  NMR (126 MHz,  $\text{CDCl}_3$ )  $\delta$  126.3, 117.1, 94.1, 84.0, 70.2, 41.2, 25.3, 23.1, 1.9.  
HRMS (APCI)  $m/z$   $[\text{M} + \text{H}]^+$  calcd for  $\text{C}_{13}\text{H}_{23}\text{SiO}$ : 223.1518, found: 223.1517.

#### NHPI Esters Preparation:

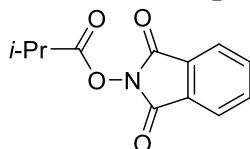

**S17**

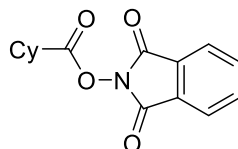

**S18**

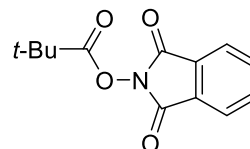

**S19**

The above NHPI esters were prepared according to reported literature procedures, and all the analytical data matched the reports (4).

### 1.3 Asymmetric Radical 1,4-functionalization of 1,3-Enynes

**General procedure 3 (GP-3): Asymmetric 1,4-functionalization of 1,3-enynes with DHP esters.**

**Preparation of the catalyst solution:** In a nitrogen-filled glovebox, and oven-dried 20 mL vial with a magnetic stir bar, were charged the CrCl<sub>2</sub> (5.0 mg, 0.04 mmol, 10 mol%) and (*S,R*)-L1 (23 mg, 0.048 mmol, 12 mol%). Then 8.0 mL THF was added and the vial was closed with a PTFE septum cap, and then stirred at room temperature for 2 h.

**Catalytic asymmetric radical 1,4-functionalization of 1,3-enynes:** In a nitrogen-filled glovebox, to the prepared catalyst solution were added the 1,3-enynes (0.6 mmol, 1.5 equiv), the aldehydes (0.4 mmol, 1.0 equiv), the DHP esters (0.6 mmol, 1.5 equiv), and 4-CzIPN (6.4 mg, 0.008 mmol, 2 mol%) sequentially. Then the vial was closed with a PTFE septum cap, and taken out of the glovebox. Then, the reaction was irradiated with two 20 W 160-440 nm LED for 12 hours (tube 5 cm away from lights, fans for cooling, 30-35 °C). After that, the reaction mixture was concentrated and run through a short silica gel pad with hexanes/EtOAc (3:1) as the eluent. Then the solvent was removed under the reduced pressure. The diastereoselectivity was determined via <sup>1</sup>H NMR analysis of the crude reaction mixture. and the residue was purified by flash chromatography to provide the desired product and the ee was determined via HPLC analysis.

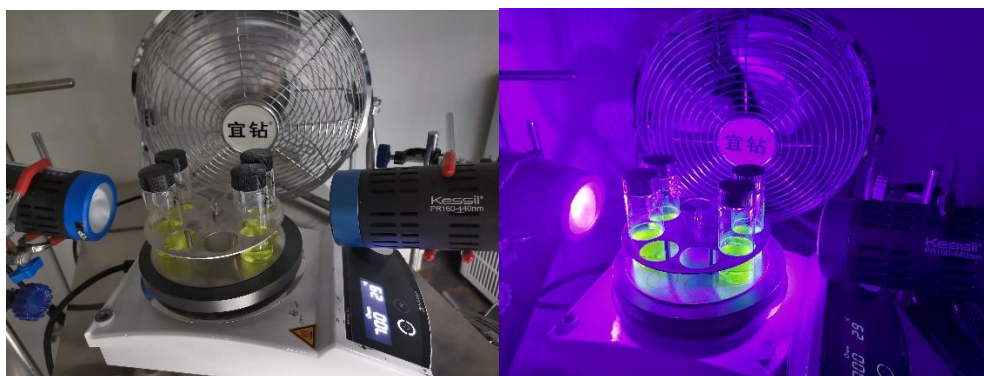

Supplementary Figure 1. Reaction Set-up

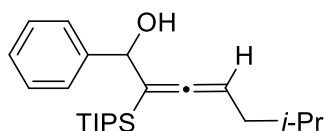

**6-methyl-1-phenyl-2-(triisopropylsilyl)hepta-2,3-dien-1-ol** (Figure 3, entry 3). The title compound was prepared according to the GP-3 from benzaldehyde, enyne 1 and DHP ester 2, purified by flash column chromatography on silica gel: 5→10% EtOAc in hexanes, colorless liquid.

(*R,S*)-L1: 131 mg, 92% yield, 20:1 dr, 95% ee; (*S,R*)-L1: 131 mg, 92% yield, 20:1 dr, 94% ee.

HPLC analysis: The ee was determined on a CHIRALCEL OD-3 column (5% *i*-PrOH in hexane, 1.0 mL/min); retention times for compound obtained using (*R,S*)-L1: 3.6 min (major), 4.4 min (minor).

<sup>1</sup>H NMR (500 MHz, CDCl<sub>3</sub>) δ 7.39 – 7.34 (m, 2H), 7.31 (dd, *J* = 10.2, 4.8 Hz, 2H), 7.24 (ddd, *J* = 6.3, 4.4, 1.3 Hz, 1H), 5.13 (s, 1H), 5.07 (td, *J* = 7.6, 2.1 Hz, 1H), 2.32 (brs, 1H), 1.99 – 1.86 (m, 2H), 1.57 (dp, *J* = 13.4, 6.7 Hz, 1H), 1.17 – 1.08 (m, 3H), 1.06 (d, *J* = 7.2 Hz, 9H), 0.93 (d, *J* = 7.3 Hz, 9H), 0.91 – 0.85 (m, 6H).

<sup>13</sup>C NMR (126 MHz, CDCl<sub>3</sub>) δ 206.6, 143.6, 128.2, 127.6, 127.2, 98.0, 88.9, 72.7, 38.0, 29.0, 22.3, 22.2, 18.7, 18.4, 11.6.

HRMS (ESI) *m/z* [M – H<sub>2</sub>O + H]<sup>+</sup> calcd for C<sub>23</sub>H<sub>37</sub>Si: 341.2664, found: 341.2650. [α]<sup>24</sup><sub>D</sub> = –181.2 (*c* = 0.5, CHCl<sub>3</sub>); 95% ee, from (*R,S*)-L1.

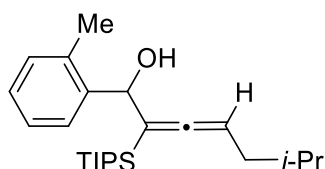

**6-methyl-1-(*o*-tolyl)-2-(triisopropylsilyl)hepta-2,3-dien-1-ol (Figure 3, entry 4).** The title compound was prepared according to the GP-3 from 2-methylbenzaldehyde, enyne 1 and DHP ester 2, purified by flash column chromatography on silica gel: 5→10% EtOAc in hexanes, colorless liquid.

(*R,S*)-L1: 141 mg, 95% yield, > 20:1 dr, 96% ee; (*S,R*)-L1: 142 mg, 96% yield, > 20:1 dr, 97% ee.

HPLC analysis: The ee was determined on a CHIRALCEL OD-3 column (3% *i*-PrOH in hexane, 1.0 mL/min); retention times for compound obtained using (*R,S*)-L1: 5.1 min (major), 5.5 min (minor).

<sup>1</sup>H NMR (500 MHz, CDCl<sub>3</sub>) δ 7.44 (dd, *J* = 7.5, 1.2 Hz, 1H), 7.18 (td, *J* = 7.4, 1.5 Hz, 1H), 7.13 (ddd, *J* = 13.6, 9.8, 4.5 Hz, 2H), 5.41 (s, 1H), 4.93 (ddd, *J* = 8.0, 7.2, 2.5 Hz, 1H), 2.39 (s, 3H), 2.08 (d, *J* = 5.3 Hz, 1H), 1.92 (dt, *J* = 13.8, 6.9 Hz, 1H), 1.83 (ddd, *J* = 13.9, 8.1, 7.0 Hz, 1H), 1.48 (dt, *J* = 13.4, 6.7 Hz, 1H), 1.21 – 1.11 (m, 3H), 1.08 (d, *J* = 7.3 Hz, 9H), 0.99 (d, *J* = 7.3 Hz, 9H), 0.82 (dd, *J* = 16.9, 6.6 Hz, 6H).

<sup>13</sup>C NMR (126 MHz, CDCl<sub>3</sub>) δ 207.2, 141.2, 135.6, 130.4, 127.4, 126.8, 125.8, 96.8, 88.2, 69.9, 37.8, 29.0, 22.3, 22.1, 19.3, 18.7, 18.5, 11.8.

HRMS (ESI) *m/z* [M – H<sub>2</sub>O + H]<sup>+</sup> calcd for C<sub>24</sub>H<sub>39</sub>Si: 355.2821, found: 355.2830. [α]<sup>24</sup><sub>D</sub> = –133.2 (*c* = 0.5, CHCl<sub>3</sub>); 96% ee, from (*R,S*)-L1.

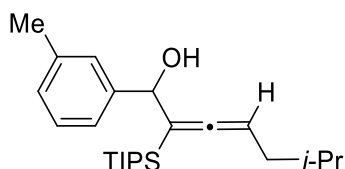

**6-methyl-1-(*m*-tolyl)-2-(triisopropylsilyl)hepta-2,3-dien-1-ol (Figure 3, entry 5).** The title compound was prepared according to the GP-3 from 3-methylbenzaldehyde, enyne **1** and DHP ester **2**, purified by flash column chromatography on silica gel: 5→10% EtOAc in hexanes, colorless liquid.

(*R,S*)-L1: 128 mg, 86% yield, 13:1 dr, 93% ee; (*S,R*)-L1: 130 mg, 88% yield, 13:1 dr, 93% ee.

HPLC analysis: The ee was determined on a CHIRALCEL OD-3 column (3% *i*-PrOH in hexane, 1.0 mL/min); retention times for compound obtained using (*R,S*)-L1: 3.6 min (major), 4.3 min (minor).

<sup>1</sup>H NMR (500 MHz, CDCl<sub>3</sub>) δ 7.22 – 7.14 (m, 3H), 7.07 – 7.03 (m, 1H), 5.10 – 5.07 (m, 2H), 2.34 (s, 3H), 2.29 (d, *J* = 5.3 Hz, 1H), 2.00 – 1.88 (m, 2H), 1.64 – 1.56 (m, 1H), 1.17 – 1.09 (m, 3H), 1.06 (d, *J* = 7.1 Hz, 9H), 0.93 (d, *J* = 7.2 Hz, 9H), 0.89 (t, *J* = 6.6 Hz, 6H).

<sup>13</sup>C NMR (126 MHz, CDCl<sub>3</sub>) δ 206.6, 143.4, 137.7, 128.3, 128.1, 128.0, 124.3, 98.0, 88.8, 72.6, 38.1, 29.0, 22.3, 22.2, 21.4, 18.7, 18.4, 11.6.

HRMS (ESI) *m/z* [M – H<sub>2</sub>O + H]<sup>+</sup> calcd for C<sub>24</sub>H<sub>39</sub>Si: 355.2821, found: 355.2816. [α]<sub>D</sub><sup>24</sup> = –146.8 (*c* = 0.5, CHCl<sub>3</sub>); 93% ee, from (*R,S*)-L1.

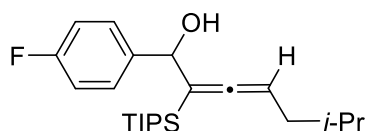

**1-(4-fluorophenyl)-6-methyl-2-(triisopropylsilyl)hepta-2,3-dien-1-ol (Figure 3, entry 6).** The title compound was prepared according to the GP-3 from 4-fluorobenzaldehyde, enyne **1** and DHP ester **2**, purified by flash column chromatography on silica gel: 5→10% EtOAc in hexanes, colorless liquid.

(*R,S*)-L1: 142 mg, 95% yield, > 20:1 dr, 93% ee; (*S,R*)-L1: 142 mg, 95% yield, > 20:1 dr, 92% ee.

HPLC analysis: The ee was determined on a CHIRALCEL OD-3 column (3% *i*-PrOH in hexane, 1.0 mL/min); retention times for compound obtained using (*R,S*)-L1: 3.7 min (major), 4.4 min (minor).

<sup>1</sup>H NMR (500 MHz, CDCl<sub>3</sub>) δ 7.37 – 7.31 (m, 2H), 7.02 – 6.98 (m, 2H), 5.13 (s, 1H), 5.07 (td, *J* = 7.6, 2.1 Hz, 1H), 2.31 (s, 1H), 2.00 – 1.83 (m, 2H), 1.58 (dp, *J* = 13.3, 6.7 Hz, 1H), 1.18 – 1.09 (m, 3H), 1.06 (d, *J* = 7.0 Hz, 9H), 0.95 (d, *J* = 7.2 Hz, 9H), 0.88 (dd, *J* = 8.2, 6.7 Hz, 6H).

<sup>13</sup>C NMR (126 MHz, CDCl<sub>3</sub>) δ 206.7 (s), 162.2 (d, *J* = 245.5 Hz), 139.5 (d, *J* = 3.1 Hz), 128.8 (d, *J* = 8.1 Hz), 114.9 (d, *J* = 21.4 Hz), 98.1 (s), 89.0 (s), 72.0 (s), 38.0 (s), 29.0 (s), 22.3 (s), 22.2 (s), 18.6 (s), 18.4 (s), 11.6 (s).

<sup>19</sup>F NMR (471 MHz, CDCl<sub>3</sub>) δ -115.16.

HRMS (ESI)  $m/z$   $[M - H_2O + H]^+$  calcd for  $C_{23}H_{36}SiF$ : 359.2570, found: 359.2566.

$[\alpha]^{24}_D = -187.2$  ( $c = 0.5$ ,  $CHCl_3$ ); 93% ee, from (*R,S*)-L1.

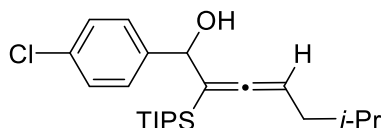

**1-(4-chlorophenyl)-6-methyl-2-(triisopropylsilyl)hepta-2,3-dien-1-ol** (Figure 3, entry 7). The title compound was prepared according to the GP-3 from 4-chlorobenzaldehyde, enyne **1** and DHP ester **2**, purified by flash column chromatography on silica gel: 5→10% EtOAc in hexanes, colorless liquid.

(*R,S*)-L1: 122 mg, 78% yield, 15:1 dr, 91% ee; (*S,R*)-L1: 122 mg, 78% yield, 15:1 dr, 93% ee.

HPLC analysis: The ee was determined on a CHIRALCEL OD-3 column (5% *i*-PrOH in hexane, 1.0 mL/min); retention times for compound obtained using (*R,S*)-L1: 3.6 min (major), 4.2 min (minor).

$^1H$  NMR (500 MHz,  $CDCl_3$ )  $\delta$  7.34 – 7.25 (m, 4H), 5.12 (s, 1H), 5.04 (t,  $J = 7.5$  Hz, 1H), 2.28 (s, 1H), 1.96 – 1.81 (m, 2H), 1.54 (tt,  $J = 13.3, 6.7$  Hz, 1H), 1.14 (dt,  $J = 14.5, 7.3$  Hz, 3H), 1.06 (d,  $J = 7.5$  Hz, 9H), 0.96 (d,  $J = 7.3$  Hz, 9H), 0.87 (dd,  $J = 9.5, 7.6$  Hz, 6H).

$^{13}C$  NMR (126 MHz,  $CDCl_3$ )  $\delta$  207.1, 142.2, 133.2, 128.4, 128.3, 97.9, 89.0, 72.1, 37.9, 29.0, 22.3, 22.1, 18.6, 18.5, 11.6.

HRMS (ESI)  $m/z$   $[M - H_2O + H]^+$  calcd for  $C_{23}H_{36}SiCl$ : 375.2275, found: 375.2286.

$[\alpha]^{24}_D = -128.8$  ( $c = 0.5$ ,  $CHCl_3$ ); 91% ee, from (*R,S*)-L1.

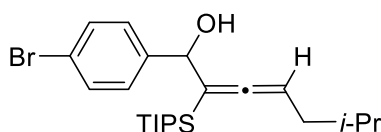

**1-(4-bromophenyl)-6-methyl-2-(triisopropylsilyl)hepta-2,3-dien-1-ol** (Figure 3, entry 8). The title compound was prepared according to the GP-3 from 4-bromobenzaldehyde, enyne **1** and DHP ester **2**, purified by flash column chromatography on silica gel: 5→10% EtOAc in hexanes, colorless liquid.

(*R,S*)-L1: 118 mg, 68% yield, 13:1 dr, 93% ee; (*S,R*)-L1: 118 mg, 68% yield, 13:1 dr, 92% ee.

HPLC analysis: The ee was determined on a CHIRALCEL OD-3 column (3% *i*-PrOH in hexane, 1.0 mL/min); retention times for compound obtained using (*R,S*)-L1: 4.2 min (major), 5.2 min (minor).

$^1H$  NMR (500 MHz,  $CDCl_3$ )  $\delta$  7.44 (d,  $J = 8.4$  Hz, 2H), 7.25 (d,  $J = 8.5$  Hz, 2H), 5.11 (s, 1H), 5.04 (td,  $J = 7.8, 1.9$  Hz, 1H), 2.24 (s, 1H), 1.89 (dtd,  $J = 21.6, 14.0, 7.3$  Hz, 2H), 1.58 – 1.50 (m, 1H), 1.17 – 1.09 (m, 3H), 1.06 (d,  $J = 7.1$  Hz, 9H), 0.96 (d,

$J = 7.2$  Hz, 9H), 0.86 (dd,  $J = 10.7$ , 6.6 Hz, 6H).

$^{13}\text{C}$  NMR (126 MHz,  $\text{CDCl}_3$ )  $\delta$  207.2, 142.8, 131.2, 128.8, 121.3, 97.9, 89.0, 72.1, 37.9, 29.0, 22.3, 22.1, 18.7, 18.5, 11.6.

HRMS (ESI)  $m/z$   $[\text{M} - \text{H}_2\text{O} + \text{H}]^+$  calcd for  $\text{C}_{23}\text{H}_{36}\text{SiBr}$ : 419.1770, found: 419.1735.

$[\alpha]^{25}_{\text{D}} = -135.2$  ( $c = 0.5$ ,  $\text{CHCl}_3$ ); 93% ee, from (*R,S*)-L1.

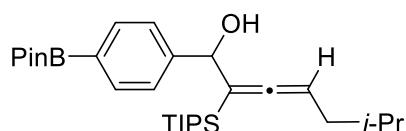

**6-methyl-1-(4-(4,4,5,5-tetramethyl-1,3,2-dioxaborolan-2-yl)phenyl)-2-(triisopropylsilyl)hepta-2,3-dien-1-ol (Figure 3, entry 9).** The title compound was prepared according to the GP-3 from 4-(4,4,5,5-tetramethyl-1,3,2-dioxaborolan-2-yl)benzaldehyde, enyne **1** and DHP ester **2**, purified by flash column chromatography on silica gel: 5→10% EtOAc in hexanes, colorless liquid.

(*R,S*)-L1: 93 mg, 48% yield, 16:1 dr, 96% ee; (*S,R*)-L1: 94 mg, 49% yield, 16:1 dr, 95% ee.

HPLC analysis: The ee was determined on a CHIRALCEL OD-3 column (3% *i*-PrOH in hexane, 1.0 mL/min); retention times for compound obtained using (*R,S*)-L1: 3.6 min (major), 3.9 min (minor).

$^1\text{H}$  NMR (500 MHz,  $\text{CDCl}_3$ )  $\delta$  7.75 (d,  $J = 8.0$  Hz, 2H), 7.37 (d,  $J = 8.0$  Hz, 2H), 5.13 (s, 1H), 5.05 (td,  $J = 7.7$ , 1.9 Hz, 1H), 2.26 (d,  $J = 4.8$  Hz, 1H), 1.97 – 1.83 (m, 2H), 1.56 – 1.52 (m, 1H), 1.34 (s, 12H), 1.17 – 1.09 (m, 3H), 1.06 (d,  $J = 7.2$  Hz, 9H), 0.94 (d,  $J = 7.3$  Hz, 9H), 0.86 (dd,  $J = 8.0$ , 6.7 Hz, 6H).

$^{13}\text{C}$  NMR (126 MHz,  $\text{CDCl}_3$ )  $\delta$  207.1, 146.8, 134.7, 126.4, 97.8, 88.8, 83.7, 72.7, 37.9, 29.0, 24.9, 24.8, 22.3, 22.2, 18.7, 18.5, 11.6.

HRMS (ESI)  $m/z$   $[\text{M} - \text{H}_2\text{O} + \text{H}]^+$  calcd for  $\text{C}_{29}\text{H}_{48}\text{SiBO}_2$ : 467.3522, found: 467.3521.

$[\alpha]^{25}_{\text{D}} = -105.2$  ( $c = 0.5$ ,  $\text{CHCl}_3$ ); 96% ee, from (*R,S*)-L1.

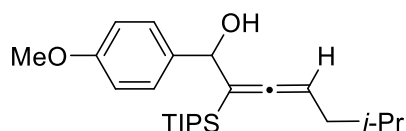

**1-(4-methoxyphenyl)-6-methyl-2-(triisopropylsilyl)hepta-2,3-dien-1-ol (Figure 3, entry 10).** The title compound was prepared according to the GP-3 from 4-methoxybenzaldehyde, enyne **1** and DHP ester **2**, purified by flash column chromatography on silica gel: 10→15% EtOAc in hexanes, colorless liquid.

(*R,S*)-L1: 125 mg, 81% yield, > 20:1 dr, 95% ee; (*S,R*)-L1: 136 mg, 88% yield, > 20:1 dr, 95% ee.

HPLC analysis: The ee was determined on a CHIRALPAK IC-3 column (3% *i*-PrOH in hexane, 1.0 mL/min); retention times for compound obtained using (*R,S*)-L1: 5.6 min (major), 5.2 min (minor).

<sup>1</sup>H NMR (500 MHz, CDCl<sub>3</sub>) δ 7.32 – 7.27 (m, 2H), 6.87 – 6.83 (m, 2H), 5.13 – 5.05 (m, 2H), 3.80 (s, 3H), 2.28 (d, *J* = 5.1 Hz, 1H), 2.03 – 1.90 (m, 2H), 1.62 (td, *J* = 13.4, 6.7 Hz, 1H), 1.16 – 1.07 (m, 3H), 1.05 (d, *J* = 6.9 Hz, 9H), 0.95 – 0.88 (m, 15H).

<sup>13</sup>C NMR (126 MHz, CDCl<sub>3</sub>) δ 206.2, 159.1, 135.8, 128.5, 113.6, 98.1, 88.9, 72.1, 55.3, 38.2, 29.0, 22.4, 22.2, 18.7, 18.4, 11.6.

HRMS (ESI) *m/z* [M – H<sub>2</sub>O + H]<sup>+</sup> calcd for C<sub>24</sub>H<sub>39</sub>SiO: 371.2770, found: 371.2737.

[α]<sup>24</sup><sub>D</sub> = –130.8 (*c* = 0.5, CHCl<sub>3</sub>); 95% ee, from (*R,S*)-L1.

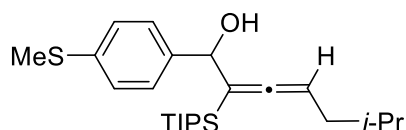

**6-methyl-1-(4-(methylthio)phenyl)-2-(triisopropylsilyl)hepta-2,3-dien-1-ol (Figure 3, entry 11).** The title compound was prepared according to the GP-3 from 4-(methylthio)benzaldehyde, enyne 1 and DHP ester 2, purified by flash column chromatography on silica gel: 10→15% EtOAc in hexanes, colorless liquid.

(*R,S*)-L1: 143 mg, 89% yield, > 20:1 dr, 95% ee; (*S,R*)-L1: 142 mg, 88% yield, > 20:1 dr, 94% ee.

HPLC analysis: The ee was determined on a CHIRALPAK IC-3 column (5% *i*-PrOH in hexane, 1.0 mL/min); retention times for compound obtained using (*R,S*)-L1: 4.6 min (major), 4.3 min (minor).

<sup>1</sup>H NMR (500 MHz, CDCl<sub>3</sub>) δ 7.31 – 7.27 (m, 2H), 7.23 – 7.20 (m, 2H), 5.12 – 5.04 (m, 2H), 2.47 (s, 3H), 2.26 (d, *J* = 5.4 Hz, 1H), 1.99 – 1.86 (m, 2H), 1.62 – 1.56 (m, 1H), 1.17 – 1.08 (m, 3H), 1.06 (d, *J* = 7.1 Hz, 9H), 0.94 (d, *J* = 7.2 Hz, 9H), 0.88 (dd, *J* = 8.4, 6.7 Hz, 6H).

<sup>13</sup>C NMR (126 MHz, CDCl<sub>3</sub>) δ 206.7, 140.7, 137.5, 127.7, 126.6, 97.9, 88.9, 72.2, 38.0, 29.0, 22.3, 22.2, 18.7, 18.5, 16.1, 11.6.

HRMS (ESI) *m/z* [M – H<sub>2</sub>O + H]<sup>+</sup> calcd for C<sub>24</sub>H<sub>39</sub>SiS: 387.2542, found: 387.2507.

[α]<sup>24</sup><sub>D</sub> = –172.4 (*c* = 0.5, CHCl<sub>3</sub>); 95% ee, from (*R,S*)-L1.

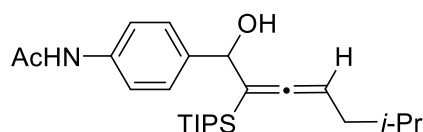

**N-(4-(1-hydroxy-6-methyl-2-(triisopropylsilyl)hepta-2,3-dien-1-yl)phenyl)acetamide (Figure 3, entry 12).** The title compound was prepared

according to the **GP-3** from *N*-(4-formylphenyl)acetamide, enyne **1** and DHP ester **2**, purified by flash column chromatography on silica gel: 10→15% EtOAc in hexanes, white solid.

(*R,S*)-**L1**: 131 mg, 79% yield, > 20:1 dr, 94% ee; (*S,R*)-**L1**: 122 mg, 74% yield, > 20:1 dr, 94% ee.

HPLC analysis: The ee was determined on a CHIRALPAK IC-3 column (15% *i*-PrOH in hexane, 1.0 mL/min); retention times for compound obtained using (*R,S*)-**L1**: 9.6 min (major), 10.2 min (minor).

<sup>1</sup>H NMR (500 MHz, CDCl<sub>3</sub>) δ 7.47 (d, *J* = 8.4 Hz, 2H), 7.33 (d, *J* = 8.4 Hz, 2H), 7.17 (s, 1H), 5.10 – 5.07 (m, 2H), 2.30 (d, *J* = 5.6 Hz, 1H), 2.17 (s, 3H), 2.01 – 1.88 (m, 2H), 1.66 – 1.58 (m, 1H), 1.16 – 1.08 (m, 3H), 1.05 (d, *J* = 7.0 Hz, 9H), 0.93 (d, *J* = 7.2 Hz, 9H), 0.90 (t, *J* = 6.6 Hz, 6H).

<sup>13</sup>C NMR (126 MHz, CDCl<sub>3</sub>) δ 206.5, 168.1, 139.4, 137.4, 127.9, 119.2, 97.9, 89.0, 72.1, 38.0, 29.0, 24.7, 22.4, 22.2, 18.7, 18.4, 11.6.

HRMS (ESI) *m/z* [*M* – H<sub>2</sub>O + H]<sup>+</sup> calcd for C<sub>25</sub>H<sub>40</sub>SiNO: 398.2879, found: 398.2893.

[α]<sub>D</sub><sup>24</sup> = –201.2 (*c* = 0.5, CHCl<sub>3</sub>); 94% ee, from (*R,S*)-**L1**.

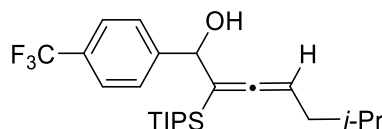

**6-methyl-1-(4-(trifluoromethyl)phenyl)-2-(triisopropylsilyl)hepta-2,3-dien-1-ol (Figure 3, entry 13)**. The title compound was prepared according to the **GP-3** from 4-(trifluoromethyl)benzaldehyde, enyne **1** and DHP ester **2**, purified by flash column chromatography on silica gel: 5→10% EtOAc in hexanes, colorless liquid.

(*R,S*)-**L1**: 102 mg, 60% yield, 10:1 dr, 94% ee; (*S,R*)-**L1**: 102 mg, 60% yield, 10:1 dr, 94% ee.

HPLC analysis: The ee was determined on a CHIRALCEL OD-3 column (3% *i*-PrOH in hexane, 1.0 mL/min); retention times for compound obtained using (*R,S*)-**L1**: 3.9 min (major), 5.4 min (minor).

<sup>1</sup>H NMR (500 MHz, CDCl<sub>3</sub>) δ 7.58 (d, *J* = 8.1 Hz, 2H), 7.48 (d, *J* = 8.2 Hz, 2H), 5.22 (d, *J* = 4.5 Hz, 1H), 5.00 (ddd, *J* = 8.6, 7.0, 1.9 Hz, 1H), 2.25 (d, *J* = 5.9 Hz, 1H), 1.87 (dt, *J* = 13.7, 6.8 Hz, 1H), 1.77 (ddd, *J* = 14.0, 8.2, 7.0 Hz, 1H), 1.44 (dt, *J* = 13.4, 6.7 Hz, 1H), 1.23 – 1.11 (m, 3H), 1.08 (d, *J* = 7.2 Hz, 9H), 0.99 (d, *J* = 7.3 Hz, 9H), 0.81 (dd, *J* = 19.8, 6.6 Hz, 6H).

<sup>13</sup>C NMR (126 MHz, CDCl<sub>3</sub>) δ 207.8 (s), 147.8 (s), 129.6 (q, *J* = 32.3 Hz), 127.2 (s), 125.0 (q, *J* = 3.8 Hz), 124.2 (q, *J* = 271.9 Hz), 97.8 (s), 88.9 (s), 72.3 (s), 37.7 (s), 29.0 (s), 22.2 (s), 22.1 (s), 18.6 (s), 18.5 (s), 11.6 (s).

<sup>19</sup>F NMR (471 MHz, CDCl<sub>3</sub>) δ –62.45.

HRMS (APCI) *m/z* [*M* – H<sub>2</sub>O + H]<sup>+</sup> calcd for C<sub>24</sub>H<sub>36</sub>SiF<sub>3</sub>: 409.2538, found: 409.2509.



$[\alpha]^{24}_{\text{D}} = -86.8$  ( $c = 0.5$ ,  $\text{CHCl}_3$ ); 94% ee, from (*R,S*)-L1.

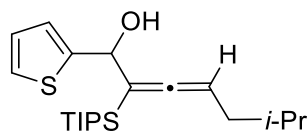

**6-methyl-1-(thiophen-2-yl)-2-(triisopropylsilyl)hepta-2,3-dien-1-ol** (**Figure 3, entry 14**). The title compound was prepared according to the **GP-3** from thiophene-2-carbaldehyde, enyne **1** and DHP ester **2**, purified by flash column chromatography on silica gel: 5→10% EtOAc in hexanes, colorless liquid.

(*R,S*)-L1: 125 mg, 86% yield, > 20:1 dr, 97% ee; (*S,R*)-L1: 129 mg, 89% yield, > 20:1 dr, 97% ee.

HPLC analysis: The ee was determined on a CHIRALCEL OD-3 column (3% *i*-PrOH in hexane, 1.0 mL/min); retention times for compound obtained using (*R,S*)-L1: 3.9 min (major), 4.4 min (minor).

$^1\text{H}$  NMR (500 MHz,  $\text{CDCl}_3$ )  $\delta$  7.23 (dd,  $J = 5.1, 1.0$  Hz, 1H), 7.01 (d,  $J = 3.0$  Hz, 1H), 6.93 (dd,  $J = 5.0, 3.5$  Hz, 1H), 5.33 (s, 1H), 5.16 (td,  $J = 7.6, 1.7$  Hz, 1H), 2.46 (brs, 1H), 2.03 (t,  $J = 7.2$  Hz, 2H), 1.72 – 1.59 (m, 1H), 1.21 – 1.14 (m, 3H), 1.09 (d,  $J = 7.3$  Hz, 9H), 0.99 (d,  $J = 7.3$  Hz, 9H), 0.93 (dd,  $J = 6.6, 5.3$  Hz, 6H).

$^{13}\text{C}$  NMR (126 MHz,  $\text{CDCl}_3$ )  $\delta$  206.5, 148.5, 126.4, 125.2 (two carbons), 98.4, 89.7, 67.8, 37.6, 29.0, 22.3, 22.2, 18.6, 18.4, 11.6.

HRMS (ESI)  $m/z$  [ $\text{M} - \text{H}_2\text{O} + \text{H}$ ] $^+$  calcd for  $\text{C}_{21}\text{H}_{35}\text{SiS}$ : 347.2229, found: 347.2224.

$[\alpha]^{24}_{\text{D}} = -148.8$  ( $c = 0.5$ ,  $\text{CHCl}_3$ ); 97% ee, from (*R,S*)-L1.

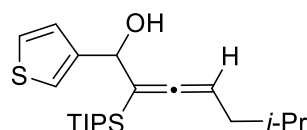

**6-methyl-1-(thiophen-3-yl)-2-(triisopropylsilyl)hepta-2,3-dien-1-ol** (**Figure 3, entry 15**). The title compound was prepared according to the **GP-3** from thiophene-3-carbaldehyde, enyne **1** and DHP ester **2**, purified by flash column chromatography on silica gel: 5→10% EtOAc in hexanes, colorless liquid.

(*R,S*)-L1: 126 mg, 87% yield, > 20:1 dr, 95% ee; (*S,R*)-L1: 127 mg, 88% yield, > 20:1 dr, 95% ee.

HPLC analysis: The ee was determined on a CHIRALCEL OD-3 column (3% *i*-PrOH in hexane, 1.0 mL/min); retention times for compound obtained using (*R,S*)-L1: 4.0 min (major), 4.8 min (minor).

$^1\text{H}$  NMR (500 MHz,  $\text{CDCl}_3$ )  $\delta$  7.27 (dd,  $J = 3.1, 1.8$  Hz, 1H), 7.22 – 7.19 (m, 1H), 7.10 (dd,  $J = 5.0, 1.2$  Hz, 1H), 5.21 (d,  $J = 1.0$  Hz, 1H), 5.10 (td,  $J = 7.6, 1.9$  Hz, 1H), 2.25 (brs, 1H), 2.03 – 1.89 (m, 2H), 1.67 – 1.55 (m, 1H), 1.20 – 1.13 (m, 3H),

1.08 (d,  $J = 7.2$  Hz, 9H), 0.98 (d,  $J = 7.3$  Hz, 9H), 0.91 (t,  $J = 6.8$  Hz, 6H).

$^{13}\text{C}$  NMR (126 MHz,  $\text{CDCl}_3$ )  $\delta$  206.7, 145.3, 126.7, 125.8, 122.0, 97.8, 88.9, 68.4, 38.0, 29.0, 22.3, 22.2, 18.6, 18.4, 11.6.

HRMS (ESI)  $m/z$   $[\text{M} - \text{H}_2\text{O} + \text{H}]^+$  calcd for  $\text{C}_{21}\text{H}_{35}\text{SiS}$ : 347.2229, found: 347.2226.

$[\alpha]^{24}_{\text{D}} = -164.0$  ( $c = 0.5$ ,  $\text{CHCl}_3$ ); 95% ee, from (*R,S*)-**L1**.

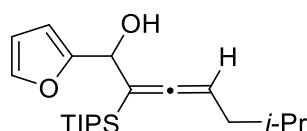

**1-(furan-2-yl)-6-methyl-2-(triisopropylsilyl)hepta-2,3-dien-1-ol (Figure 3, entry 16).** The title compound was prepared according to the **GP-3** from furan-2-carbaldehyde, enyne **1** and DHP ester **2**, purified by flash column chromatography on silica gel: 5→10% EtOAc in hexanes, colorless liquid.

(*R,S*)-**L1**: 116 mg, 84% yield, 8:1 dr, 88% ee; (*S,R*)-**L1**: 116 mg, 84% yield, 8:1 dr, 88% ee.

HPLC analysis: The ee was determined on a CHIRALCEL OD-3 column (3% *i*-PrOH in hexane, 1.0 mL/min); retention times for compound obtained using (*R,S*)-**L1**: 3.6 min (major), 4.0 min (minor).

$^1\text{H}$  NMR (500 MHz,  $\text{CDCl}_3$ )  $\delta$  7.37 – 7.34 (m, 1H), 6.30 (dd,  $J = 3.2, 1.8$  Hz, 1H), 6.25 (d,  $J = 3.2$  Hz, 1H), 5.16 (td,  $J = 7.6, 1.9$  Hz, 1H), 5.08 (s, 1H), 2.35 (brs, 1H), 2.05 – 1.92 (m, 2H), 1.71 – 1.59 (m, 1H), 1.18 – 1.09 (m, 3H), 1.07 (d,  $J = 7.1$  Hz, 9H), 0.99 (d,  $J = 7.2$  Hz, 9H), 0.92 (dd,  $J = 6.6, 3.7$  Hz, 6H).

$^{13}\text{C}$  NMR (126 MHz,  $\text{CDCl}_3$ )  $\delta$  206.9, 156.0, 142.0, 110.1, 107.2, 95.4, 89.4, 65.6, 37.9, 28.9, 22.4, 22.2, 18.6, 18.4, 11.5.

HRMS (ESI)  $m/z$   $[\text{M} - \text{H}_2\text{O} + \text{H}]^+$  calcd for  $\text{C}_{21}\text{H}_{35}\text{SiO}$ : 331.2457, found: 331.2455.

$[\alpha]^{24}_{\text{D}} = -156.8$  ( $c = 0.5$ ,  $\text{CHCl}_3$ ); 88% ee, from (*R,S*)-**L1**.

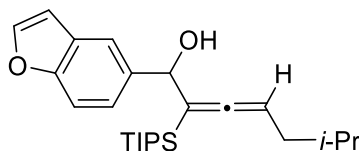

**1-(benzofuran-5-yl)-6-methyl-2-(triisopropylsilyl)hepta-2,3-dien-1-ol (Figure 3, entry 17).** The title compound was prepared according to the **GP-3** from benzofuran-5-carbaldehyde, enyne **1** and DHP ester **2**, purified by flash column chromatography on silica gel: 10→15% EtOAc in hexanes, colorless liquid.

(*R,S*)-**L1**: 138 mg, 87% yield, 15:1 dr, 92% ee; (*S,R*)-**L1**: 136 mg, 85% yield, 15:1 dr, 91% ee.

HPLC analysis: The ee was determined on a CHIRALCEL OD-3 column (3%

*i*-PrOH in hexane, 1.0 mL/min); retention times for compound obtained using (*R,S*)-L1: 5.0 min (major), 6.8 min (minor).

<sup>1</sup>H NMR (500 MHz, CDCl<sub>3</sub>) δ 7.61 (t, *J* = 2.4 Hz, 2H), 7.45 (d, *J* = 8.5 Hz, 1H), 7.33 (dd, *J* = 8.5, 1.7 Hz, 1H), 6.74 (dd, *J* = 2.1, 0.7 Hz, 1H), 5.24 (d, *J* = 2.7 Hz, 1H), 5.10 (td, *J* = 7.7, 2.2 Hz, 1H), 2.36 (d, *J* = 5.4 Hz, 1H), 2.02 – 1.89 (m, 2H), 1.62 – 1.56 (m, 1H), 1.18 – 1.09 (m, 3H), 1.06 (d, *J* = 7.1 Hz, 9H), 0.92 (d, *J* = 7.2 Hz, 9H), 0.87 (dd, *J* = 11.3, 6.6 Hz, 6H).

<sup>13</sup>C NMR (126 MHz, CDCl<sub>3</sub>) δ 206.5, 154.5, 145.3, 138.3, 127.2, 123.8, 119.9, 111.1, 106.7, 98.4, 89.0, 72.8, 38.1, 29.0, 22.3, 22.2, 18.7, 18.4, 11.6.

HRMS (ESI) *m/z* [M – H<sub>2</sub>O + H]<sup>+</sup> calcd for C<sub>25</sub>H<sub>37</sub>SiO: 381.2614, found: 381.2601.

[α]<sup>24</sup><sub>D</sub> = –156.8 (*c* = 0.5, CHCl<sub>3</sub>); 92% ee, from (*R,S*)-L1.

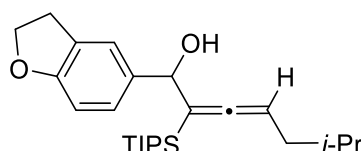

**1-(2,3-dihydrobenzofuran-5-yl)-6-methyl-2-(triisopropylsilyl)hepta-2,3-dien-1-ol (Figure 3, entry 18).** The title compound was prepared according to the GP-3 from 2,3-dihydrobenzofuran-5-carbaldehyde, enyne **1** and DHP ester **2**, purified by flash column chromatography on silica gel: 10→15% EtOAc in hexanes, colorless liquid.

(*R,S*)-L1: 115 mg, 72% yield, > 20:1 dr, 94% ee; (*S,R*)-L1: 116 mg, 73% yield, > 20:1 dr, 92% ee.

SFC analysis: The ee was determined on a CHIRALPAK IC-3 column (5% *i*-PrOH in CO<sub>2</sub>, 2.0 mL/min); retention times for compound obtained using (*R,S*)-L1: 6.0 min (major), 4.5 min (minor).

<sup>1</sup>H NMR (500 MHz, CDCl<sub>3</sub>) δ 7.23 (s, 1H), 7.11 (d, *J* = 8.2 Hz, 1H), 6.71 (d, *J* = 8.2 Hz, 1H), 5.10 (td, *J* = 7.6, 2.2 Hz, 1H), 5.08 – 5.03 (m, 1H), 4.56 (t, *J* = 8.7 Hz, 2H), 3.18 (t, *J* = 8.6 Hz, 2H), 2.27 (d, *J* = 5.7 Hz, 1H), 2.03 – 1.91 (m, 2H), 1.62 (dp, *J* = 13.3, 6.7 Hz, 1H), 1.12 (dt, *J* = 9.6, 7.2 Hz, 3H), 1.06 (d, *J* = 6.9 Hz, 9H), 0.96 – 0.88 (m, 15H).

<sup>13</sup>C NMR (126 MHz, CDCl<sub>3</sub>) δ 206.1, 159.6, 135.7, 127.3, 126.9, 124.0, 108.7, 98.2, 88.9, 72.3, 71.3, 38.2, 29.7, 29.1, 22.4, 22.2, 18.7, 18.4, 11.6.

HRMS (ESI) *m/z* [M – H<sub>2</sub>O + H]<sup>+</sup> calcd for C<sub>25</sub>H<sub>39</sub>SiO: 383.2770, found: 383.2844.

[α]<sup>24</sup><sub>D</sub> = –136.8 (*c* = 0.5, CHCl<sub>3</sub>); 94% ee, from (*R,S*)-L1.

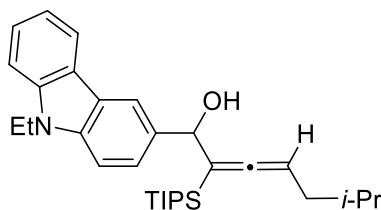

**1-(9-ethyl-9H-carbazol-3-yl)-6-methyl-2-(triisopropylsilyl)hepta-2,3-dien-1-ol (Figure 3, entry 19).** The title compound was prepared according to the GP-3 from 9-ethyl-9H-carbazole-3-carbaldehyde, enyne **1** and DHP ester **2**, purified by flash column chromatography on silica gel: 10→15% EtOAc in hexanes, colorless liquid.

(*R,S*)-L1: 159 mg, 84% yield, 19:1 dr, 94% ee; (*S,R*)-L1: 159 mg, 84% yield, 19:1 dr, 94% ee.

HPLC analysis: The ee was determined on a CHIRALCEL OJ-3 column (3% *i*-PrOH in hexane, 1.0 mL/min); retention times for compound obtained using (*R,S*)-L1: 5.8 min (major), 7.4 min (minor).

<sup>1</sup>H NMR (500 MHz, CDCl<sub>3</sub>) δ 8.13 (d, *J* = 1.3 Hz, 1H), 8.07 (d, *J* = 7.7 Hz, 1H), 7.51 (dd, *J* = 8.4, 1.6 Hz, 1H), 7.48 – 7.43 (m, 1H), 7.40 (d, *J* = 8.1 Hz, 1H), 7.35 (d, *J* = 8.4 Hz, 1H), 7.22 (dd, *J* = 11.1, 4.0 Hz, 1H), 5.33 (dd, *J* = 6.0, 2.1 Hz, 1H), 5.16 (td, *J* = 7.6, 2.2 Hz, 1H), 4.35 (q, *J* = 7.2 Hz, 2H), 2.42 (d, *J* = 6.0 Hz, 1H), 2.12 – 1.98 (m, 2H), 1.64 (dp, *J* = 13.4, 6.7 Hz, 1H), 1.40 (t, *J* = 7.2 Hz, 3H), 1.16 (dd, *J* = 15.0, 7.5 Hz, 3H), 1.07 (d, *J* = 7.2 Hz, 9H), 0.94 – 0.86 (m, 15H).

<sup>13</sup>C NMR (126 MHz, CDCl<sub>3</sub>) δ 206.3, 140.3, 139.7, 134.0, 125.5, 125.4, 123.1, 122.7, 120.3, 119.4, 118.7, 108.5, 108.2, 98.4, 88.8, 73.0, 38.3, 37.6, 29.1, 22.4, 22.3, 18.7, 18.4, 13.7, 11.6.

HRMS (ESI) *m/z* [M – H<sub>2</sub>O + H]<sup>+</sup> calcd for C<sub>31</sub>H<sub>44</sub>SiN: 458.3243, found: 458.3244.

[α]<sup>25</sup><sub>D</sub> = –218.8 (*c* = 0.5, CHCl<sub>3</sub>); 94% ee, from (*R,S*)-L1.

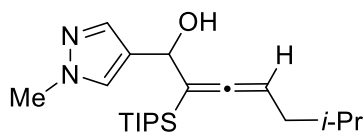

**6-methyl-1-(1-methyl-1H-pyrazol-4-yl)-2-(triisopropylsilyl)hepta-2,3-dien-1-ol (Figure 3, entry 20).** The title compound was prepared according to the GP-3 from 1-methyl-1H-pyrazole-4-carbaldehyde, enyne **1** and DHP ester **2**, purified by flash column chromatography on silica gel: 10→15% EtOAc in hexanes, colorless liquid.

(*R,S*)-L1: 78 mg, 54% yield, 20:1 dr, 96% ee; (*S,R*)-L1: 82 mg, 57% yield, 20:1 dr, 95% ee.

HPLC analysis: The ee was determined on a CHIRALCEL OD-3 column (3% *i*-PrOH in hexane, 1.0 mL/min); retention times for compound obtained using (*R,S*)-L1: 11.4 min (major), 15.4 min (minor).

<sup>1</sup>H NMR (500 MHz, CDCl<sub>3</sub>) δ 7.43 (s, 1H), 7.29 (s, 1H), 5.09 – 5.05 (m, 2H),

3.85 (s, 3H), 2.18 (d,  $J = 6.1$  Hz, 1H), 2.01 – 1.87 (m, 2H), 1.61 (dp,  $J = 13.3, 6.7$  Hz, 1H), 1.19 – 1.10 (m, 3H), 1.06 (d,  $J = 7.3$  Hz, 9H), 0.99 (d,  $J = 7.3$  Hz, 9H), 0.89 (dd,  $J = 9.2, 6.7$  Hz, 6H).

$^{13}\text{C}$  NMR (126 MHz,  $\text{CDCl}_3$ )  $\delta$  207.0, 138.2, 128.7, 125.7, 97.9, 88.7, 64.7, 38.9, 38.1, 29.0, 22.4, 22.2, 18.7, 18.5, 11.6.

HRMS (ESI)  $m/z$   $[\text{M} - \text{H}_2\text{O} + \text{H}]^+$  calcd for  $\text{C}_{21}\text{H}_{37}\text{SiN}_2$ : 345.2726, found: 345.2691.

$[\alpha]^{24}_{\text{D}} = -110.0$  ( $c = 0.5$ ,  $\text{CHCl}_3$ ); 96% ee, from (*R,S*)-L1.

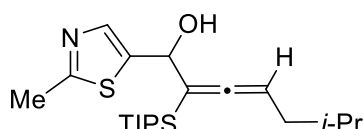

**6-methyl-1-(2-methylthiazol-5-yl)-2-(triisopropylsilyl)hepta-2,3-dien-1-ol (Figure 3, entry 21).** The title compound was prepared according to the GP-3 from 2-methylthiazole-5-carbaldehyde, enyne **1** and DHP ester **2**, purified by flash column chromatography on silica gel: 10→15% EtOAc in hexanes, colorless liquid.

(*R,S*)-L1: 109 mg, 72% yield, 13:1 dr, 94% ee; (*S,R*)-L1: 103 mg, 68% yield, 13:1 dr, 96% ee.

HPLC analysis: The ee was determined on a CHIRALCEL OD-3 column (3% *i*-PrOH in hexane, 1.0 mL/min); retention times for compound obtained using (*R,S*)-L1: 6.1 min (major), 6.9 min (minor).

$^1\text{H}$  NMR (500 MHz,  $\text{CDCl}_3$ )  $\delta$  7.48 (s, 1H), 5.29 (brs, 1H), 5.16 (td,  $J = 7.6, 1.5$  Hz, 1H), 2.67 (s, 3H), 2.36 (d,  $J = 6.8$  Hz, 1H), 2.00 (t,  $J = 7.2$  Hz, 2H), 1.67 – 1.59 (m, 1H), 1.21 – 1.11 (m, 3H), 1.08 (d,  $J = 7.3$  Hz, 9H), 1.00 (d,  $J = 7.3$  Hz, 9H), 0.91 (t,  $J = 6.4$  Hz, 6H).

$^{13}\text{C}$  NMR (126 MHz,  $\text{CDCl}_3$ )  $\delta$  206.8, 166.5, 142.8, 139.7, 98.3, 90.1, 66.1, 37.6, 29.0, 22.3, 22.2, 19.4, 18.6, 18.5, 11.5.

HRMS (ESI)  $m/z$   $[\text{M} - \text{H}_2\text{O} + \text{H}]^+$  calcd for  $\text{C}_{21}\text{H}_{36}\text{SiNS}$ : 362.2338, found: 362.2365.

$[\alpha]^{24}_{\text{D}} = -109.2$  ( $c = 0.5$ ,  $\text{CHCl}_3$ ); 94% ee, from (*R,S*)-L1.

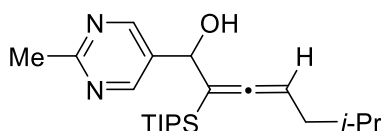

**6-methyl-1-(2-methylpyrimidin-5-yl)-2-(triisopropylsilyl)hepta-2,3-dien-1-ol (Figure 3, entry 22).** The title compound was prepared according to the GP-3 from 2-methylpyrimidine-5-carbaldehyde, enyne **1** and DHP ester **2**, purified by flash column chromatography on silica gel: 15→20% EtOAc in hexanes, colorless liquid.

(*R,S*)-L1: 113 mg, 76% yield, 8:1 dr, 94% ee; (*S,R*)-L1: 114 mg, 77% yield, 8:1

dr, 94% ee.

HPLC analysis: The ee was determined on a CHIRALPAK IC-3 column (15% *i*-PrOH in hexane, 1.0 mL/min); retention times for compound obtained using (*R,S*)-L1: 6.8 min (major), 7.8 min (minor).

<sup>1</sup>H NMR (500 MHz, CDCl<sub>3</sub>) δ 8.63 (s, 2H), 5.19 (s, 1H), 5.07 – 5.00 (m, 1H), 2.72 (s, 3H), 1.90 (dt, *J* = 13.8, 6.8 Hz, 1H), 1.85 – 1.75 (m, 1H), 1.62 (brs, 1H), 1.56 – 1.44 (m, 1H), 1.21 – 1.13 (m, 3H), 1.08 (d, *J* = 7.2 Hz, 9H), 1.01 (d, *J* = 7.3 Hz, 9H), 0.83 (d, *J* = 6.7 Hz, 3H), 0.79 (d, *J* = 6.6 Hz, 3H).

<sup>13</sup>C NMR (126 MHz, CDCl<sub>3</sub>) δ 208.2, 167.1, 155.8, 133.5, 97.4, 89.4, 68.9, 37.6, 28.9, 25.7, 22.2, 22.0, 18.6 (two carbons), 11.6.

HRMS (ESI) *m/z* [M – H<sub>2</sub>O + H]<sup>+</sup> calcd for C<sub>22</sub>H<sub>37</sub>SiN<sub>2</sub>: 357.2726, found: 357.2695.

[α]<sup>24</sup><sub>D</sub> = –63.6 (*c* = 0.5, CHCl<sub>3</sub>); 94% ee, from (*R,S*)-L1.

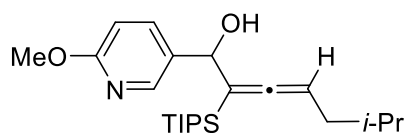

**1-(6-methoxypyridin-3-yl)-6-methyl-2-(triisopropylsilyl)hepta-2,3-dien-1-ol (Figure 3, entry 23).** The title compound was prepared according to the GP-3 from 6-methoxynicotinaldehyde, enyne **1** and DHP ester **2**, purified by flash column chromatography on silica gel: 15→20% EtOAc in hexanes, colorless liquid.

(*R,S*)-L1: 118 mg, 76% yield, 20:1 dr, 94% ee; (*S,R*)-L1: 119 mg, 77% yield, 20:1 dr, 94% ee.

HPLC analysis: The ee was determined on a CHIRALCEL OD-3 column (3% *i*-PrOH in hexane, 1.0 mL/min); retention times for compound obtained using (*R,S*)-L1: 6.1 min (major), 5.7 min (minor).

<sup>1</sup>H NMR (500 MHz, CDCl<sub>3</sub>) δ 8.12 (d, *J* = 2.3 Hz, 1H), 7.61 (dd, *J* = 8.6, 2.4 Hz, 1H), 6.72 (d, *J* = 8.6 Hz, 1H), 5.14 – 5.11 (m, 1H), 5.08 (td, *J* = 7.6, 2.1 Hz, 1H), 3.92 (s, 3H), 2.28 (d, *J* = 5.5 Hz, 1H), 1.99 – 1.85 (m, 2H), 1.57 (td, *J* = 13.4, 6.7 Hz, 1H), 1.18 – 1.09 (m, 3H), 1.06 (d, *J* = 7.1 Hz, 9H), 0.95 (d, *J* = 7.2 Hz, 9H), 0.87 (dd, *J* = 9.8, 6.7 Hz, 6H).

<sup>13</sup>C NMR (126 MHz, CDCl<sub>3</sub>) δ 206.7, 163.7, 145.5, 137.8, 131.9, 110.7, 97.8, 89.2, 70.0, 53.5, 38.0, 29.0, 22.3, 22.1, 18.7, 18.5, 11.6.

HRMS (ESI) *m/z* [M – H<sub>2</sub>O + H]<sup>+</sup> calcd for C<sub>23</sub>H<sub>38</sub>SiON: 372.2723, found: 372.3690.

[α]<sup>24</sup><sub>D</sub> = –290.8 (*c* = 0.5, CHCl<sub>3</sub>); 94% ee, from (*R,S*)-L1.

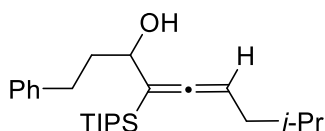

**8-methyl-1-phenyl-4-(triisopropylsilyl)nona-4,5-dien-3-ol (Figure 3, entry 24).** The title compound was prepared according to the **GP-3** from 3-phenylpropanal, enyne **1** and DHP ester **2**, purified by flash column chromatography on silica gel: 5→10% EtOAc in hexanes, colorless liquid.

(*R,S*)-**L1**: 134 mg, 87% yield, 10:1 dr, 88% ee; (*S,R*)-**L1**: 134 mg, 87% yield, 10:1 dr, 86% ee.

HPLC analysis: The ee was determined on a CHIRALCEL OD-3 column (3% *i*-PrOH in hexane, 1.0 mL/min); retention times for compound obtained using (*R,S*)-**L1**: 3.8 min (major), 4.1 min (minor).

<sup>1</sup>H NMR (500 MHz, CDCl<sub>3</sub>) δ 7.27 (dd, *J* = 12.4, 4.9 Hz, 2H), 7.18 (dd, *J* = 14.9, 7.3 Hz, 3H), 5.03 (td, *J* = 7.6, 1.4 Hz, 1H), 4.02 (d, *J* = 5.6 Hz, 1H), 2.89 – 2.80 (m, 1H), 2.68 (ddd, *J* = 13.7, 10.1, 6.6 Hz, 1H), 2.03 – 1.89 (m, 3H), 1.87 – 1.77 (m, 1H), 1.70 – 1.59 (m, 1H), 1.14 (ddd, *J* = 10.3, 8.6, 5.0 Hz, 3H), 1.09 – 1.02 (m, 18H), 0.92 (d, *J* = 6.7 Hz, 6H).

<sup>13</sup>C NMR (126 MHz, CDCl<sub>3</sub>) δ 206.6, 142.2, 128.5, 128.3, 125.7, 97.5, 88.2, 69.3, 40.4, 38.1, 32.5, 29.0, 22.4, 22.2, 18.7, 11.6.

HRMS (ESI) *m/z* [M – H<sub>2</sub>O + H]<sup>+</sup> calcd for C<sub>25</sub>H<sub>41</sub>Si: 369.2978, found: 369.2950. [α]<sup>24</sup><sub>D</sub> = –40.0 (*c* = 0.5, CHCl<sub>3</sub>); 88% ee, from (*R,S*)-**L1**.

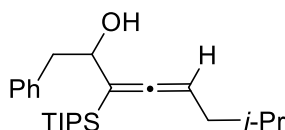

**7-methyl-1-phenyl-3-(triisopropylsilyl)octa-3,4-dien-2-ol (Figure 3, entry 25).** The title compound was prepared according to the **GP-3** from 2-phenylacetaldehyde, enyne **1** and DHP ester **2**, purified by flash column chromatography on silica gel: 5→10% EtOAc in hexanes, colorless liquid.

(*R,S*)-**L1**: 122 mg, 82% yield, 7:1 dr, 88% ee; (*S,R*)-**L1**: 122 mg, 82% yield, 7:1 dr, 88% ee.

HPLC analysis: The ee was determined on a CHIRALCEL OD-3 column (5% *i*-PrOH in hexane, 1.0 mL/min); retention times for compound obtained using (*R,S*)-**L1**: 3.2 min (major), 3.4 min (minor).

<sup>1</sup>H NMR (600 MHz, CDCl<sub>3</sub>) δ 7.30 (t, *J* = 7.4 Hz, 2H), 7.25 – 7.20 (m, 3H), 5.07 – 5.01 (m, 1H), 4.23 (d, *J* = 7.2 Hz, 1H), 3.02 (dd, *J* = 13.9, 3.3 Hz, 1H), 2.79 (dd, *J* = 13.9, 9.2 Hz, 1H), 2.01 – 1.89 (m, 2H), 1.65 (td, *J* = 13.4, 6.7 Hz, 1H), 1.58 (brs, 1H), 1.21 (dq, *J* = 14.2, 7.3 Hz, 3H), 1.09 (t, *J* = 7.2 Hz, 18H), 0.95 (dd, *J* = 6.6, 2.1 Hz, 6H).

<sup>13</sup>C NMR (151 MHz, CDCl<sub>3</sub>) δ 207.5, 139.2, 129.5, 128.4, 126.3, 96.8, 87.8, 71.1, 44.9, 38.0, 29.0, 22.4, 22.3, 18.7 (two carbons), 11.6.

HRMS (ESI) *m/z* [M – H<sub>2</sub>O + H]<sup>+</sup> calcd for C<sub>24</sub>H<sub>39</sub>Si: 355.2821, found: 355.2815. [α]<sup>24</sup><sub>D</sub> = +8.8 (*c* = 0.5, CHCl<sub>3</sub>); 88% ee, from (*R,S*)-**L1**.

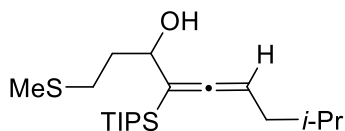

**8-methyl-1-(methylthio)-4-(triisopropylsilyl)nona-4,5-dien-3-ol (Figure 3, entry 26).** The title compound was prepared according to the GP-3 from 3-(methylthio)propanal, enyne **1** and DHP ester **2**, purified by flash column chromatography on silica gel: 5→10% EtOAc in hexanes, colorless liquid.

(*R,S*)-L1: 104 mg, 73% yield, 10:1 dr, 80% ee; (*S,R*)-L1: 104 mg, 73% yield, 10:1 dr, 78% ee.

HPLC analysis: The ee was determined on a CHIRALCEL OD-3 column (5% *i*-PrOH in hexane, 1.0 mL/min); retention times for compound obtained using (*R,S*)-L1: 3.2 min (major), 3.5 min (minor).

<sup>1</sup>H NMR (500 MHz, CDCl<sub>3</sub>) δ 5.01 (td, *J* = 7.7, 1.4 Hz, 1H), 4.12 (d, *J* = 6.3 Hz, 1H), 2.71 – 2.55 (m, 2H), 2.10 (s, 3H), 1.99 – 1.87 (m, 3H), 1.80 (dtd, *J* = 13.9, 8.5, 5.3 Hz, 1H), 1.64 (dq, *J* = 13.3, 6.7 Hz, 2H), 1.22 – 1.13 (m, 3H), 1.12 – 1.05 (m, 18H), 0.93 (dd, *J* = 6.7, 2.1 Hz, 6H).

<sup>13</sup>C NMR (126 MHz, CDCl<sub>3</sub>) δ 206.8, 97.1, 88.1, 69.0, 38.1, 37.7, 31.0, 29.0, 22.4, 22.2, 18.7 (two carbons), 15.5, 11.6.

HRMS (ESI) *m/z* [M – H<sub>2</sub>O + H]<sup>+</sup> calcd for C<sub>20</sub>H<sub>39</sub>SiS: 339.2542, found: 339.2549.

[α]<sup>24</sup><sub>D</sub> = –23.6 (*c* = 0.5, CHCl<sub>3</sub>); 80% ee, from (*R,S*)-L1.

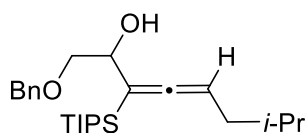

**1-(benzyloxy)-7-methyl-3-(triisopropylsilyl)octa-3,4-dien-2-ol (Figure 3, entry 27).** The title compound was prepared according to the GP-3 from 2-(benzyloxy)acetaldehyde, enyne **1** and DHP ester **2**, purified by flash column chromatography on silica gel: 5→10% EtOAc in hexanes, colorless liquid.

(*R,S*)-L1: 132 mg, 82% yield, 6:1 dr, 82% ee; (*S,R*)-L1: 130 mg, 81% yield, 6:1 dr, 80% ee.

HPLC analysis: The ee was determined on a CHIRALCEL OD-3 column (3% *i*-PrOH in hexane, 1.0 mL/min); retention times for compound obtained using (*R,S*)-L1: 3.8 min (major), 6.0 min (minor).

<sup>1</sup>H NMR (500 MHz, CDCl<sub>3</sub>) δ 7.38 – 7.26 (m, 5H), 5.00 – 4.94 (m, 1H), 4.58 (q, *J* = 11.9 Hz, 2H), 4.26 (d, *J* = 8.3 Hz, 1H), 3.61 (dd, *J* = 9.9, 2.8 Hz, 1H), 3.44 (dd, *J* = 9.8, 8.8 Hz, 1H), 2.34 (brs, 1H), 1.99 – 1.79 (m, 2H), 1.62 (td, *J* = 13.4, 6.7 Hz, 1H), 1.21 – 1.12 (m, 3H), 1.07 (dd, *J* = 9.6, 7.3 Hz, 18H), 0.90 (dd, *J* = 6.7, 3.2 Hz, 6H).

<sup>13</sup>C NMR (126 MHz, CDCl<sub>3</sub>) δ 208.0, 138.1, 128.4, 127.7 (two carbons), 92.5, 86.9, 74.9, 73.2, 68.9, 38.0, 28.9, 22.4, 22.2, 18.6 (two carbons), 11.5.

HRMS (ESI) *m/z* [M – H<sub>2</sub>O + H]<sup>+</sup> calcd for C<sub>25</sub>H<sub>41</sub>SiO: 385.2927, found:



385.2927.

$[\alpha]^{24}_{\text{D}} = -31.6$  ( $c = 0.5$ ,  $\text{CHCl}_3$ ); 82% ee, from (*R,S*)-L1.

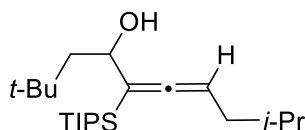

**2,2,9-trimethyl-5-(triisopropylsilyl)deca-5,6-dien-4-ol (Figure 3, entry 28).**

The title compound was prepared according to the GP-3 from 3,3-dimethylbutanal, enyne **1** and DHP ester **2**, purified by flash column chromatography on silica gel: 5→10% EtOAc in hexanes, colorless liquid.

(*R,S*)-L1: 98 mg, 70% yield, 5:1 dr, 82% ee; (*S,R*)-L1: 99 mg, 70% yield, 5:1 dr, 83% ee.

HPLC analysis: The ee was determined on a CHIRALPAK AD-3 column (0.5% *i*-PrOH in hexane, 1.0 mL/min); retention times for compound obtained using (*R,S*)-L1: 3.5 min (major), 3.8 min (minor).

$^1\text{H}$  NMR (500 MHz,  $\text{CDCl}_3$ )  $\delta$  5.01 – 4.95 (m, 1H), 4.15 (d,  $J = 9.6$  Hz, 1H), 2.01 – 1.87 (m, 2H), 1.66 (dt,  $J = 20.1, 6.7$  Hz, 1H), 1.61 – 1.56 (m, 2H), 1.46 (dd,  $J = 14.7, 9.7$  Hz, 1H), 1.22 – 1.13 (m, 3H), 1.08 (t,  $J = 7.1$  Hz, 18H), 0.98 (s, 9H), 0.94 (dd,  $J = 6.6, 2.7$  Hz, 6H).

$^{13}\text{C}$  NMR (126 MHz,  $\text{CDCl}_3$ )  $\delta$  207.2, 99.0, 87.9, 68.2, 52.2, 38.1, 30.5, 30.3, 29.0, 22.5, 22.3, 18.7 (two carbons), 11.6.

HRMS (ESI)  $m/z$   $[\text{M} - \text{H}_2\text{O} + \text{H}]^+$  calcd for  $\text{C}_{22}\text{H}_{43}\text{Si}$ : 335.3134, found: 335.3112.

$[\alpha]^{24}_{\text{D}} = -16.0$  ( $c = 0.5$ ,  $\text{CHCl}_3$ ); 82% ee, from (*R,S*)-L1.

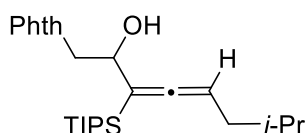

**2-(2-hydroxy-7-methyl-3-(triisopropylsilyl)octa-3,4-dien-1-yl)isoindoline-1,3-dione (Figure 3, entry 29).** The title compound was prepared according to the GP-3 from 2-(1,3-dioxoisoindolin-2-yl)acetaldehyde, enyne **1** and DHP ester **2**, purified by flash column chromatography on silica gel: 10→15% EtOAc in hexanes, colorless liquid.

(*R,S*)-L1: 109 mg, 62% yield, 7:1 dr, 89% ee; (*S,R*)-L1: 111 mg, 63% yield, 7:1 dr, 87% ee.

HPLC analysis: The ee was determined on a CHIRALPAK AD-3 column (5% *i*-PrOH in hexane, 1.0 mL/min); retention times for compound obtained using (*R,S*)-L1: 4.7 min (major), 6.0 min (minor).

$^1\text{H}$  NMR (500 MHz,  $\text{CDCl}_3$ )  $\delta$  7.85 – 7.80 (m, 2H), 7.72 – 7.67 (m, 2H), 5.12 – 5.07 (m, 1H), 4.28 (t,  $J = 8.0$  Hz, 1H), 3.83 (ddd,  $J = 17.3, 14.2, 6.5$  Hz, 2H), 2.04 – 1.92 (m, 2H), 1.85 (d,  $J = 9.6$  Hz, 1H), 1.75 – 1.63 (m, 1H), 1.28 – 1.17 (m, 3H), 1.10 (dd,  $J = 7.4, 2.9$  Hz, 18H), 0.96 (dd,  $J = 6.6, 5.6$  Hz, 6H).

$^{13}\text{C}$  NMR (126 MHz,  $\text{CDCl}_3$ )  $\delta$  207.4, 168.7, 133.9, 132.1, 123.2, 94.6, 88.4, 68.2, 44.9, 38.1, 29.0, 22.4, 22.3, 18.60 (two carbons), 11.4.

HRMS (ESI)  $m/z$   $[\text{M} - \text{H}_2\text{O} + \text{H}]^+$  calcd for  $\text{C}_{26}\text{H}_{38}\text{SiNO}_2$ : 424.2672, found: 424.2672.

$[\alpha]^{24}_{\text{D}} = +54.8$  ( $c = 0.5$ ,  $\text{CHCl}_3$ ); 89% ee, from (*R,S*)-L1.

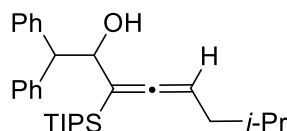

**7-methyl-1,1-diphenyl-3-(triisopropylsilyl)octa-3,4-dien-2-ol** (Figure 3, entry 30). The title compound was prepared according to the GP-3 from 2,2-diphenylacetaldehyde, enyne 1 and DHP ester 2, purified by flash column chromatography on silica gel: 5→10% EtOAc in hexanes, colorless liquid.

(*R,S*)-L1: 139 mg, 78% yield, 20:1 dr, 96% ee; (*S,R*)-L1: 138 mg, 78% yield, 20:1 dr, 94% ee.

HPLC analysis: The ee was determined on a CHIRALPAK AD-3 column (5% *i*-PrOH in hexane, 1.0 mL/min); retention times for compound obtained using (*R,S*)-L1: 3.0 min (major), 3.4 min (minor).

$^1\text{H}$  NMR (500 MHz,  $\text{CDCl}_3$ )  $\delta$  7.34 (d,  $J = 8.1$  Hz, 4H), 7.29 – 7.21 (m, 4H), 7.15 (ddd,  $J = 14.9, 4.9, 1.1$  Hz, 2H), 4.86 (m, 2H), 4.25 (d,  $J = 6.9$  Hz, 1H), 1.67 (d,  $J = 6.1$  Hz, 1H), 1.46 (dd,  $J = 10.4, 4.2$  Hz, 2H), 1.40 (dt,  $J = 13.8, 6.7$  Hz, 1H), 1.24 – 1.15 (m, 3H), 1.06 (d,  $J = 7.6$  Hz, 18H), 0.80 (dd,  $J = 6.4, 4.0$  Hz, 6H).

$^{13}\text{C}$  NMR (126 MHz,  $\text{CDCl}_3$ )  $\delta$  207.7, 143.3, 141.4, 129.5, 128.7, 128.3, 128.2, 126.5, 126.1, 95.3, 88.0, 72.2, 57.2, 36.7, 28.8, 22.2, 22.1, 18.7 (two carbons), 11.8.

HRMS (ESI)  $m/z$   $[\text{M} - \text{H}_2\text{O} + \text{H}]^+$  calcd for  $\text{C}_{30}\text{H}_{43}\text{Si}$ : 431.3134, found: 431.3128.

$[\alpha]^{24}_{\text{D}} = +41.6$  ( $c = 0.5$ ,  $\text{CHCl}_3$ ); 96% ee, from (*R,S*)-L1.

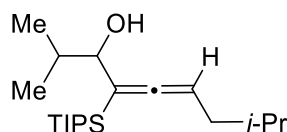

**2,8-dimethyl-4-(triisopropylsilyl)nona-4,5-dien-3-ol** (Figure 3, entry 31). The title compound was prepared according to the GP-3 from isobutyraldehyde, enyne 1 and DHP ester 2, purified by flash column chromatography on silica gel: 5→10% EtOAc in hexanes, colorless liquid.

(*R,S*)-L1: 108 mg, 84% yield, > 20:1 dr, 96% ee; (*S,R*)-L1: 108 mg, 84% yield, > 20:1 dr, 96% ee.

HPLC analysis: The ee was determined on a CHIRALPAK AD-3 column (1% *i*-PrOH in hexane, 1.0 mL/min); retention times for compound obtained using (*R,S*)-L1: 3.9 min (major), 4.2 min (minor).

$^1\text{H}$  NMR (600 MHz,  $\text{CDCl}_3$ )  $\delta$  4.99 (ddd,  $J = 8.7, 7.2, 1.8$  Hz, 1H), 3.82 (d,  $J = 3.2$  Hz, 1H), 2.02 – 1.89 (m, 2H), 1.88 – 1.79 (m, 1H), 1.68 – 1.61 (m, 1H), 1.50 (brs,

1H), 1.18 (tt,  $J = 13.9, 7.1$  Hz, 3H), 1.08 (dd,  $J = 10.2, 7.3$  Hz, 18H), 1.00 (d,  $J = 6.8$  Hz, 3H), 0.92 (dd,  $J = 6.6, 5.2$  Hz, 9H).

$^{13}\text{C}$  NMR (151 MHz,  $\text{CDCl}_3$ )  $\delta$  206.1, 96.5, 87.9, 74.6, 38.0, 33.4, 29.1, 22.4, 22.2, 20.8, 18.7 (two carbons), 15.9, 11.7.

HRMS (ESI)  $m/z$   $[\text{M} - \text{H}_2\text{O} + \text{H}]^+$  calcd for  $\text{C}_{20}\text{H}_{39}\text{Si}$ : 307.2821, found: 307.2755.  $[\alpha]^{24}_{\text{D}} = -29.6$  ( $c = 0.5, \text{CHCl}_3$ ); 96% ee, from (*R,S*)-L1.

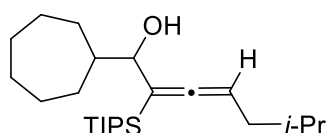

**1-cycloheptyl-6-methyl-2-(triisopropylsilyl)hepta-2,3-dien-1-ol (Figure 3, entry 32).** The title compound was prepared according to the GP-3 from cycloheptanecarbaldehyde, enyne **1** and DHP ester **2**, purified by flash column chromatography on silica gel: 5→10% EtOAc in hexanes, colorless liquid.

(*R,S*)-L1: 99 mg, 66% yield, 20:1 dr, 97% ee; (*S,R*)-L1: 99 mg, 66% yield, 20:1 dr, 98% ee.

HPLC analysis: The ee was determined on a CHIRALCEL OD-3 column (0.5% *i*-PrOH in hexane, 1.0 mL/min); retention times for compound obtained using (*R,S*)-L1: 3.6 min (major), 4.0 min (minor).

$^1\text{H}$  NMR (500 MHz,  $\text{CDCl}_3$ )  $\delta$  4.99 (ddd,  $J = 8.0, 7.2, 2.0$  Hz, 1H), 3.92 (s, 1H), 2.02 – 1.88 (m, 2H), 1.83 (ddd,  $J = 13.7, 7.1, 3.4$  Hz, 1H), 1.77 – 1.62 (m, 5H), 1.60 – 1.36 (m, 8H), 1.26 (dtd,  $J = 13.3, 10.3, 3.4$  Hz, 1H), 1.22 – 1.12 (m, 3H), 1.08 (t,  $J = 7.1$  Hz, 18H), 0.93 (dd,  $J = 6.7, 1.2$  Hz, 6H).

$^{13}\text{C}$  NMR (126 MHz,  $\text{CDCl}_3$ )  $\delta$  206.0, 96.8, 88.0, 74.8, 44.4, 38.2, 33.4, 29.1, 28.6, 28.2, 27.3, 26.8 (two carbons), 22.4, 22.2, 18.8, 18.7, 11.7.

HRMS (ESI)  $m/z$   $[\text{M} - \text{H}_2\text{O} + \text{H}]^+$  calcd for  $\text{C}_{24}\text{H}_{45}\text{Si}$ : 361.3290, found: 361.3287.

$[\alpha]^{24}_{\text{D}} = -50.8$  ( $c = 0.5, \text{CHCl}_3$ ); 97% ee, from (*R,S*)-L1.

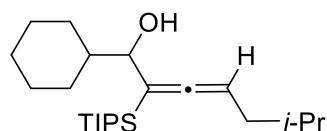

**1-cyclohexyl-6-methyl-2-(triisopropylsilyl)hepta-2,3-dien-1-ol (Figure 3, entry 33).** The title compound was prepared according to the GP-3 from cyclohexanecarbaldehyde, enyne **1** and DHP ester **2**, purified by flash column chromatography on silica gel: 5→10% EtOAc in hexanes, colorless liquid.

(*R,S*)-L1: 123 mg, 85% yield, > 20:1 dr, 94% ee; (*S,R*)-L1: 123 mg, 85% yield, > 20:1 dr, 95% ee.

HPLC analysis: The ee was determined on a CHIRALCEL OD-3 column (1% *i*-PrOH in hexane, 1.0 mL/min); retention times for compound obtained using (*R,S*)-L1: 3.3 min (major), 3.6 min (minor).

$^1\text{H}$  NMR (500 MHz,  $\text{CDCl}_3$ )  $\delta$  4.97 (ddd,  $J = 8.4, 7.1, 1.7$  Hz, 1H), 3.78 (s, 1H), 2.00 – 1.85 (m, 3H), 1.83 – 1.72 (m, 2H), 1.64 (qd,  $J = 13.5, 6.9$  Hz, 3H), 1.54 – 1.42 (m, 2H), 1.25 – 1.13 (m, 7H), 1.13 – 1.04 (m, 18H), 1.02 – 0.97 (m, 1H), 0.93 (d,  $J = 6.7$  Hz, 6H).

$^{13}\text{C}$  NMR (126 MHz,  $\text{CDCl}_3$ )  $\delta$  206.3, 95.8, 87.7, 74.2, 43.3, 37.9, 31.2, 29.1, 26.5 (three carbons), 26.2, 22.4, 22.3, 18.7 (two carbons), 11.7.

HRMS (ESI)  $m/z$   $[\text{M} - \text{H}_2\text{O} + \text{H}]^+$  calcd for  $\text{C}_{23}\text{H}_{43}\text{Si}$ : 347.3134, found: 347.3129.

$[\alpha]^{24}_{\text{D}} = -57.6$  ( $c = 0.5$ ,  $\text{CHCl}_3$ ); 94% ee, from (*R,S*)-L1.

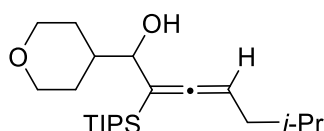

**6-methyl-1-(tetrahydro-2H-pyran-4-yl)-2-(triisopropylsilyl)hepta-2,3-dien-1-ol (Figure 3, entry 34).** The title compound was prepared according to the **GP-3** from tetrahydro-2H-pyran-4-carbaldehyde, enyne **1** and DHP ester **2**, purified by flash column chromatography on silica gel: 5→10% EtOAc in hexanes, colorless liquid.

(*R,S*)-L1: 117 mg, 80% yield, > 20:1 dr, 92% ee; (*S,R*)-L1: 117 mg, 80% yield, > 20:1 dr, 94% ee.

HPLC analysis: The ee was determined on a CHIRALCEL OD-3 column (5% *i*-PrOH in hexane, 1.0 mL/min); retention times for compound obtained using (*R,S*)-L1: 3.5 min (major), 4.0 min (minor).

$^1\text{H}$  NMR (600 MHz,  $\text{CDCl}_3$ )  $\delta$  5.00 – 4.93 (m, 1H), 4.03 (dd,  $J = 11.3, 4.0$  Hz, 1H), 3.98 (dd,  $J = 11.2, 2.9$  Hz, 1H), 3.76 (s, 1H), 3.38 – 3.29 (m, 2H), 1.96 (dt,  $J = 13.6, 6.7$  Hz, 1H), 1.93 – 1.84 (m, 1H), 1.82 – 1.73 (m, 2H), 1.63 (dp,  $J = 13.3, 6.7$  Hz, 1H), 1.57 – 1.48 (m, 2H), 1.48 – 1.36 (m, 2H), 1.22 – 1.14 (m, 3H), 1.08 (dd,  $J = 10.2, 7.4$  Hz, 18H), 0.92 (d,  $J = 6.7$  Hz, 6H).

$^{13}\text{C}$  NMR (151 MHz,  $\text{CDCl}_3$ )  $\delta$  206.9, 95.0, 87.6, 73.7, 68.1, 67.8, 40.8, 37.9, 30.8, 29.1, 27.7, 22.4, 22.2, 18.7, 11.6.

HRMS (ESI)  $m/z$   $[\text{M} - \text{H}_2\text{O} + \text{H}]^+$  calcd for  $\text{C}_{22}\text{H}_{41}\text{SiO}$ : 349.2927, found: 349.2924.

$[\alpha]^{24}_{\text{D}} = -33.2$  ( $c = 0.5$ ,  $\text{CHCl}_3$ ); 92% ee, from (*R,S*)-L1.

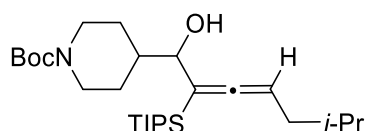

**tert-butyl 4-(1-hydroxy-6-methyl-2-(triisopropylsilyl)hepta-2,3-dien-1-yl)piperidine-1-carboxylate (Figure 3, entry 35).** The title compound was prepared according to the **GP-3** from *tert*-butyl 4-formylpiperidine-1-carboxylate, enyne **1** and DHP ester **2**, purified by flash column chromatography on silica gel: 5→10% EtOAc in hexanes, colorless liquid.

(*R,S*)-L1: 158 mg, 85% yield, > 20:1 dr, 92% ee; (*S,R*)-L1: 158 mg, 85% yield, > 20:1 dr, 92% ee.

HPLC analysis: The ee was determined on a CHIRALCEL OD-3 column (5% *i*-PrOH in hexane, 1.0 mL/min); retention times for compound obtained using (*R,S*)-L1: 3.5 min (major), 4.8 min (minor).

<sup>1</sup>H NMR (600 MHz, CDCl<sub>3</sub>) δ 4.98 (t, *J* = 7.5 Hz, 1H), 4.14 (brs, 2H), 3.78 (s, 1H), 2.62 (brs, 2H), 2.00 – 1.83 (m, 3H), 1.73 – 1.57 (m, 4H), 1.45 (s, 9H), 1.33 (qd, *J* = 12.7, 4.4 Hz, 1H), 1.24 – 1.14 (m, 4H), 1.07 (dd, *J* = 11.1, 7.4 Hz, 18H), 0.93 (d, *J* = 6.7 Hz, 6H).

<sup>13</sup>C NMR (151 MHz, CDCl<sub>3</sub>) δ 206.7, 154.8, 95.4, 87.8, 79.2, 73.5, 44.3, 43.5, 41.9, 37.9, 30.0, 29.1, 28.5, 26.4, 22.4, 22.3, 18.7 (two carbons), 11.6.

HRMS (ESI) *m/z* [*M* – H<sub>2</sub>O + H]<sup>+</sup> calcd for C<sub>27</sub>H<sub>50</sub>SiNO<sub>2</sub>: 448.3611, found: 448.3606.

[α]<sub>D</sub><sup>24</sup> = –23.2 (*c* = 0.5, CHCl<sub>3</sub>); 92% ee, from (*R,S*)-L1.

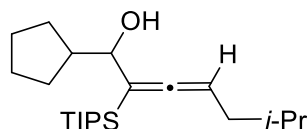

**1-cyclopentyl-6-methyl-2-(triisopropylsilyl)hepta-2,3-dien-1-ol (Figure 3, entry 36).** The title compound was prepared according to the GP-3 from cyclopentanecarbaldehyde, enyne **1** and DHP ester **2**, purified by flash column chromatography on silica gel: 5→10% EtOAc in hexanes, colorless liquid.

(*R,S*)-L1: 100 mg, 72% yield, 20:1 dr, 92% ee; (*S,R*)-L1: 100 mg, 72% yield, 20:1 dr, 94% ee.

HPLC analysis: The ee was determined on a CHIRALCEL OD-3 column (1% *i*-PrOH in hexane, 1.0 mL/min); retention times for compound obtained using (*R,S*)-L1: 3.4 min (major), 3.7 min (minor).

<sup>1</sup>H NMR (500 MHz, CDCl<sub>3</sub>) δ 4.98 – 4.89 (m, 1H), 3.85 (d, *J* = 6.6 Hz, 1H), 2.24 – 2.14 (m, 1H), 2.02 – 1.88 (m, 2H), 1.78 – 1.58 (m, 5H), 1.57 – 1.40 (m, 4H), 1.32 (ddd, *J* = 14.4, 11.8, 7.6 Hz, 1H), 1.25 – 1.14 (m, 3H), 1.09 (t, *J* = 7.1 Hz, 18H), 0.93 (dd, *J* = 6.7, 1.1 Hz, 6H).

<sup>13</sup>C NMR (126 MHz, CDCl<sub>3</sub>) δ 207.2, 96.5, 87.3, 73.7, 45.9, 38.0, 30.3, 29.1, 27.9, 25.9, 25.8, 22.4, 22.2, 18.7 (two carbons), 11.6.

HRMS (ESI) *m/z* [*M* – H<sub>2</sub>O + H]<sup>+</sup> calcd for C<sub>22</sub>H<sub>41</sub>Si: 333.2978, found: 333.2967.

[α]<sub>D</sub><sup>24</sup> = –30.4 (*c* = 0.5, CHCl<sub>3</sub>); 92% ee, from (*R,S*)-L1.

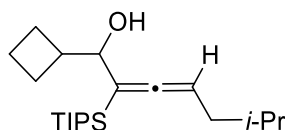

**1-cyclobutyl-6-methyl-2-(triisopropylsilyl)hepta-2,3-dien-1-ol (Figure 3, entry 37).** The title compound was prepared according to the GP-3 from

cyclobutanecarbaldehyde, enyne **1** and DHP ester **2**, purified by flash column chromatography on silica gel: 5→10% EtOAc in hexanes, colorless liquid.

(*R,S*)-**L1**: 103 mg, 77% yield, > 20:1 dr, 92% ee; (*S,R*)-**L1**: 103 mg, 77% yield, > 20:1 dr, 92% ee.

HPLC analysis: The ee was determined on a CHIRALCEL OD-3 column (1% *i*-PrOH in hexane, 1.0 mL/min); retention times for compound obtained using (*R,S*)-**L1**: 3.5 min (major), 3.9 min (minor).

<sup>1</sup>H NMR (600 MHz, CDCl<sub>3</sub>) δ 4.92 (td, *J* = 7.5, 1.4 Hz, 1H), 3.92 (d, *J* = 6.1 Hz, 1H), 2.64 – 2.55 (m, 1H), 1.97 – 1.79 (m, 7H), 1.78 – 1.71 (m, 1H), 1.63 (dp, *J* = 13.4, 6.7 Hz, 1H), 1.49 (brs, 1H), 1.22 – 1.14 (m, 3H), 1.08 (dd, *J* = 7.5, 3.7 Hz, 18H), 0.95 – 0.90 (m, 6H).

<sup>13</sup>C NMR (151 MHz, CDCl<sub>3</sub>) δ 206.9, 94.9, 87.1, 72.8, 41.3, 38.3, 29.1, 24.8, 23.3, 22.3, 22.2, 18.7 (two carbons), 17.6, 11.6.

HRMS (ESI) *m/z* [M – H<sub>2</sub>O + H]<sup>+</sup> calcd for C<sub>21</sub>H<sub>39</sub>Si: 319.2821, found: 319.2823. [α]<sup>24</sup><sub>D</sub> = –31.6 (*c* = 0.5, CHCl<sub>3</sub>); 92% ee, from (*R,S*)-**L1**.

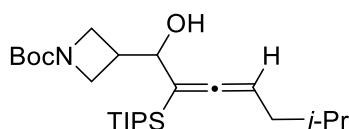

**tert-butyl 3-(1-hydroxy-6-methyl-2-(triisopropylsilyl)hepta-2,3-dien-1-yl)azetidine-1-carboxylate** (Figure 3, entry 38). The title compound was prepared according to the GP-3 from *tert*-butyl 3-formylazetidine-1-carboxylate, enyne **1** and DHP ester **2**, purified by flash column chromatography on silica gel: 5→10% EtOAc in hexanes, colorless liquid.

(*R,S*)-**L1**: 150 mg, 86% yield, 18:1 dr, 91% ee; (*S,R*)-**L1**: 150 mg, 86% yield, 18:1 dr, 91% ee.

HPLC analysis: The ee was determined on a CHIRALCEL OD-3 column (5% *i*-PrOH in hexane, 1.0 mL/min); retention times for compound obtained using (*R,S*)-**L1**: 3.4 min (major), 4.0 min (minor).

<sup>1</sup>H NMR (600 MHz, CDCl<sub>3</sub>) δ 4.96 (dd, *J* = 7.4, 6.5 Hz, 1H), 4.15 (d, *J* = 4.5 Hz, 1H), 3.89 (ddd, *J* = 15.0, 13.0, 7.6 Hz, 3H), 3.71 (s, 1H), 2.85 – 2.76 (m, 1H), 1.90 (t, *J* = 7.2 Hz, 2H), 1.73 (s, 1H), 1.64 (td, *J* = 13.4, 6.7 Hz, 1H), 1.44 (s, 9H), 1.23 – 1.16 (m, 3H), 1.08 (dd, *J* = 7.4, 3.2 Hz, 18H), 0.93 (dd, *J* = 8.2, 6.7 Hz, 6H).

<sup>13</sup>C NMR (151 MHz, CDCl<sub>3</sub>) δ 206.9, 156.4, 94.5, 87.7, 79.2, 71.0, 51.3, 38.1, 34.6, 29.7, 29.0, 28.4, 22.3 (two carbons), 18.7 (two carbons), 11.6.

HRMS (ESI) *m/z* [M + Na]<sup>+</sup> calcd for C<sub>25</sub>H<sub>47</sub>SiNO<sub>3</sub>Na: 460.3223, found: 460.3212.

[α]<sup>24</sup><sub>D</sub> = –7.6 (*c* = 0.5, CHCl<sub>3</sub>); 91% ee, from (*R,S*)-**L1**.

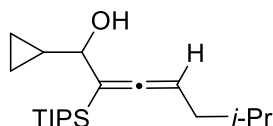

**1-cyclopropyl-6-methyl-2-(triisopropylsilyl)hepta-2,3-dien-1-ol (Figure 3, entry 39).** The title compound was prepared according to the GP-3 from cyclopropanecarbaldehyde, enyne **1** and DHP ester **2**, purified by flash column chromatography on silica gel: 5→10% EtOAc in hexanes, colorless liquid.

(*R,S*)-L1: 90 mg, 70% yield, 20:1 dr, 90% ee; (*S,R*)-L1: 90 mg, 70% yield, 20:1 dr, 90% ee.

HPLC analysis: The ee was determined on a CHIRALCEL OD-3 column (3% *i*-PrOH in hexane, 1.0 mL/min); retention times for compound obtained using (*R,S*)-L1: 3.1 min (major), 3.5 min (minor).

<sup>1</sup>H NMR (500 MHz, CDCl<sub>3</sub>) δ 5.02 – 4.94 (m, 1H), 3.47 (d, *J* = 7.3 Hz, 1H), 2.04 – 1.87 (m, 2H), 1.65 (tt, *J* = 13.4, 6.7 Hz, 1H), 1.59 (brs, 1H), 1.24 – 1.14 (m, 4H), 1.09 (dd, *J* = 7.3, 5.4 Hz, 18H), 0.93 (d, *J* = 6.7 Hz, 6H), 0.53 – 0.45 (m, 2H), 0.41 – 0.34 (m, 1H), 0.32 – 0.27 (m, 1H).

<sup>13</sup>C NMR (126 MHz, CDCl<sub>3</sub>) δ 207.8, 96.8, 87.3, 73.9, 38.2, 29.1, 22.4, 22.3, 18.8, 18.7, 18.4, 11.7, 3.3, 2.7.

HRMS (ESI) *m/z* [M – H<sub>2</sub>O + H]<sup>+</sup> calcd for C<sub>20</sub>H<sub>37</sub>Si: 305.2664, found: 305.2653. [α]<sup>24</sup><sub>D</sub> = –46.4 (*c* = 0.5, CHCl<sub>3</sub>); 90% ee, from (*R,S*)-L1.

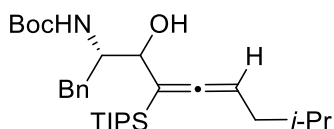

**tert-butyl ((2*S*)-3-hydroxy-8-methyl-1-phenyl-4-(triisopropylsilyl)nona-4,5-dien-2-yl)carbamate (Figure 3, entry 40&41).** The title compound was prepared according to the GP-3 from *tert*-butyl (*S*)-(1-oxo-3-phenylpropan-2-yl)carbamate, enyne **1** and DHP ester **2**, purified by flash column chromatography on silica gel: 10→15% EtOAc in hexanes.

(*R,S*)-L1: 140 mg, 70% yield, 99:1 dr; (*S,R*)-L1: 124 mg, 62% yield, 1:99 dr.

HPLC analysis: The dr was determined on a CHIRALPAK AD-3 column (5% *i*-PrOH in hexane, 1.0 mL/min); retention times for compound obtained using (*R,S*)-L1: 3.6 min (major), 6.3 min (minor).

NMR spectra for product from (*R,S*)-L1:

<sup>1</sup>H NMR (500 MHz, C<sub>6</sub>D<sub>6</sub>, 60 °C) δ 7.41 – 7.31 (m, 2H), 7.22 (t, *J* = 7.6 Hz, 2H), 7.13 (t, *J* = 7.4 Hz, 1H), 5.00 (dd, *J* = 17.1, 8.5 Hz, 2H), 4.28 (s, 1H), 4.12 (s, 1H), 3.19 (s, 1H), 3.12 – 3.01 (m, 1H), 2.11 (t, *J* = 6.8 Hz, 2H), 1.98 (s, 1H), 1.77 – 1.61 (m, 1H), 1.52 (s, 9H), 1.20 – 1.09 (m, 21H), 1.05 (dd, *J* = 9.7, 6.7 Hz, 6H).

<sup>13</sup>C NMR (126 MHz, C<sub>6</sub>D<sub>6</sub>, 60 °C) δ 205.9, 154.7, 138.3, 129.0, 127.6, 125.5, 95.5, 88.0, 77.6, 68.5, 67.6, 55.5, 37.4, 28.3, 27.6, 21.5, 21.2, 17.9, 11.0.

NMR spectra for product from (*S,R*)-L1:

$^1\text{H}$  NMR (500 MHz,  $\text{C}_6\text{D}_6$ , 60 °C)  $\delta$  7.27 (d,  $J$  = 7.3 Hz, 2H), 7.18 (s, 1H), 7.15 (s, 1H), 7.06 (t,  $J$  = 7.4 Hz, 1H), 4.90 (td,  $J$  = 7.5, 2.5 Hz, 1H), 4.74 (brs, 1H), 4.48 (s, 1H), 4.21 (t,  $J$  = 9.4 Hz, 1H), 3.20 (dd,  $J$  = 14.2, 3.4 Hz, 1H), 2.86 (s, 1H), 2.55 (brs, 1H), 2.01 – 1.91 (m, 2H), 1.59 (dp,  $J$  = 13.3, 6.7 Hz, 1H), 1.40 – 1.24 (m, 12H), 1.19 (dd,  $J$  = 7.4, 4.3 Hz, 18H), 0.88 (dd,  $J$  = 6.6, 4.4 Hz, 6H).

$^{13}\text{C}$  NMR (126 MHz,  $\text{C}_6\text{D}_6$ , 60 °C)  $\delta$  206.0, 154.9, 138.6, 128.7, 127.6, 125.4, 95.0, 86.8, 78.0, 72.1, 56.3, 37.3, 28.3, 27.4, 21.4, 21.3, 18.1 (two carbons), 11.3.

HRMS (ESI)  $m/z$   $[\text{M} - \text{H}_2\text{O} + \text{H}]^+$  calcd for  $\text{C}_{30}\text{H}_{50}\text{SiNO}_2$ : 484.3611, found: 484.3609.

$[\alpha]^{24}_{\text{D}} = -40.8$  ( $c$  = 0.5,  $\text{CHCl}_3$ ); 99:1 dr, from (*R,S*)-L1.

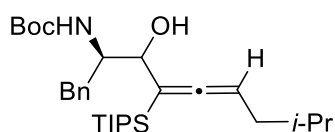

**tert-butyl ((2*R*)-3-hydroxy-8-methyl-1-phenyl-4-(triisopropylsilyl)nona-4,5-dien-2-yl)carbamate (Figure 3, entry 42&43).** The title compound was prepared according to the GP-3 from *tert*-butyl (*R*)-(1-oxo-3-phenylpropan-2-yl)carbamate, enyne **1** and DHP ester **2**, purified by flash column chromatography on silica gel: 10→15% EtOAc in hexanes.

(*R,S*)-L1: 128 mg, 64% yield, 99:1 dr; (*S,R*)-L1: 140 mg, 70% yield, 1:99 dr.

HPLC analysis: The dr was determined on a CHIRALPAK IC-3 column (5% *i*-PrOH in hexane, 1.0 mL/min); retention times for compound obtained using (*R,S*)-L1: 4.2 min (major), 3.8 min (minor).

NMR spectra for product from (*R,S*)-L1:

$^1\text{H}$  NMR (500 MHz,  $\text{C}_6\text{D}_6$ , 60 °C)  $\delta$  7.27 (d,  $J$  = 7.4 Hz, 2H), 7.18 (s, 1H), 7.15 (s, 1H), 7.06 (t,  $J$  = 7.4 Hz, 1H), 4.90 (td,  $J$  = 7.5, 2.5 Hz, 1H), 4.75 (brs, 1H), 4.49 (s, 1H), 4.21 (t,  $J$  = 9.5 Hz, 1H), 3.20 (dd,  $J$  = 14.2, 3.5 Hz, 1H), 2.86 (s, 1H), 2.57 (brs, 1H), 1.97 (dd,  $J$  = 11.0, 4.6 Hz, 2H), 1.59 (dp,  $J$  = 13.4, 6.7 Hz, 1H), 1.39 – 1.28 (m, 12H), 1.19 (dd,  $J$  = 7.4, 4.4 Hz, 18H), 0.88 (dd,  $J$  = 6.6, 4.4 Hz, 6H).

$^{13}\text{C}$  NMR (126 MHz,  $\text{C}_6\text{D}_6$ , 60 °C)  $\delta$  206.0, 155.0, 138.6, 128.7, 127.6, 125.4, 95.0, 86.8, 78.0, 72.1, 56.3, 37.3, 28.3, 27.4, 21.4, 21.3, 18.1 (two carbons), 11.3.

NMR spectra for product from (*S,R*)-L1:

$^1\text{H}$  NMR (500 MHz,  $\text{C}_6\text{D}_6$ , 60 °C)  $\delta$  7.31 (d,  $J$  = 7.3 Hz, 2H), 7.18 – 7.14 (m, 2H), 7.06 (t,  $J$  = 7.4 Hz, 1H), 5.01 – 4.88 (m, 2H), 4.21 (s, 1H), 4.04 (brs, 1H), 3.12 (s, 1H), 3.00 (dd,  $J$  = 12.7, 9.2 Hz, 1H), 2.04 (t,  $J$  = 6.8 Hz, 2H), 1.98 (brs, 1H), 1.64 (dp,  $J$  = 12.9, 6.5 Hz, 1H), 1.45 (s, 9H), 1.13 – 1.02 (m, 21H), 0.98 (dd,  $J$  = 9.7, 6.7 Hz, 6H).

$^{13}\text{C}$  NMR (126 MHz,  $\text{C}_6\text{D}_6$ , 60 °C)  $\delta$  206.0, 154.7, 138.3, 129.0, 127.6, 125.5, 95.5, 87.9, 77.6, 67.6, 55.5, 39.1, 37.4, 28.3, 27.6, 21.6, 21.2, 17.9, 11.0.

HRMS (ESI)  $m/z$   $[\text{M} - \text{H}_2\text{O} + \text{H}]^+$  calcd for  $\text{C}_{30}\text{H}_{50}\text{SiNO}_2$ : 484.3611, found: 484.3610.



$[\alpha]^{24}_{\text{D}} = -17.6$  ( $c = 0.5$ ,  $\text{CHCl}_3$ ); 99:1 dr, from (*R,S*)-L1.

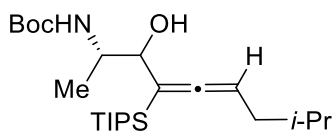

***tert*-butyl ((2*S*)-3-hydroxy-8-methyl-4-(triisopropylsilyl)nona-4,5-dien-2-yl)carbamate (Figure 3, entry 44&45).** The title compound was prepared according to the GP-3 from *tert*-butyl (*S*)-(1-oxopropan-2-yl)carbamate, enyne **1** and DHP ester **2**, purified by flash column chromatography on silica gel: 10→15% EtOAc in hexanes.

(*R,S*)-L1: 113 mg, 67% yield, 99:1 dr; (*S,R*)-L1: 102 mg, 60% yield, 1:99 dr.

HPLC analysis: The dr was determined on a CHIRALPAK AD-3 column (5% *i*-PrOH in hexane, 1.0 mL/min); retention times for compound obtained using (*R,S*)-L1: 3.2 min (major), 4.1 min (minor).

NMR spectra for product from (*R,S*)-L1:

$^1\text{H}$  NMR (500 MHz,  $\text{C}_6\text{D}_6$ , 60 °C)  $\delta$  4.86 (td,  $J = 7.5, 1.4$  Hz, 1H), 4.75 (d,  $J = 7.4$  Hz, 1H), 3.98 – 3.96 (m, 2H), 2.12 (s, 1H), 1.97 (t,  $J = 7.1$  Hz, 2H), 1.63 – 1.53 (m, 1H), 1.44 (s, 9H), 1.27 – 1.20 (m, 6H), 1.15 (d,  $J = 7.4$  Hz, 18H), 0.93 (t,  $J = 6.9$  Hz, 6H).

$^{13}\text{C}$  NMR (126 MHz,  $\text{C}_6\text{D}_6$ , 60 °C)  $\delta$  206.2, 155.0, 95.1, 87.1, 77.6, 72.3, 50.0, 37.2, 28.3, 27.6, 21.5, 21.2, 18.5, 18.0 (two carbons), 11.2.

NMR spectra for product from (*S,R*)-L1:

$^1\text{H}$  NMR (500 MHz,  $\text{C}_6\text{D}_6$ , 60 °C)  $\delta$  4.95 (d,  $J = 8.5$  Hz, 1H), 4.84 (td,  $J = 7.6, 2.6$  Hz, 1H), 4.36 (s, 1H), 4.07 (dd,  $J = 8.1, 5.7$  Hz, 1H), 2.02 (d,  $J = 5.1$  Hz, 1H), 1.92 – 1.81 (m, 2H), 1.57 – 1.49 (m, 1H), 1.44 (s, 9H), 1.32 – 1.22 (m, 3H), 1.17 – 1.11 (m, 21H), 0.86 (dd,  $J = 6.7, 2.4$  Hz, 6H).

$^{13}\text{C}$  NMR (126 MHz,  $\text{C}_6\text{D}_6$ , 60 °C)  $\delta$  206.2, 155.1, 95.7, 87.8, 78.4, 72.2, 50.7, 37.7, 28.8, 28.1, 22.0, 21.8, 18.6 (two carbons), 13.5, 11.8.

HRMS (ESI)  $m/z$   $[\text{M} - \text{H}_2\text{O} + \text{H}]^+$  calcd for  $\text{C}_{24}\text{H}_{36}\text{SiNO}_2$ : 408.3298, found: 408.3294.

$[\alpha]^{24}_{\text{D}} = -42.4$  ( $c = 0.5$ ,  $\text{CHCl}_3$ ); 99:1 dr, from (*R,S*)-L1.

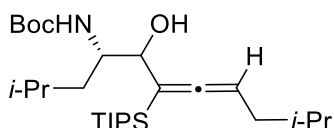

***tert*-butyl ((4*S*)-5-hydroxy-2,10-dimethyl-6-(triisopropylsilyl)undeca-6,7-dien-4-yl)carbamate (Figure 3, entry 46&47).** The title compound was prepared according to the GP-3 from *tert*-butyl (*S*)-(4-methyl-1-oxopentan-2-yl)carbamate, enyne **1** and DHP ester **2**, purified by flash column chromatography on silica gel: 10→15% EtOAc in hexanes.

(*R,S*)-L1: 128 mg, 69% yield, 99:1 dr; (*S,R*)-L1: 108 mg, 58% yield, 1:99 dr.

HPLC analysis: The dr was determined on a CHIRALPAK AD-3 column (5% *i*-PrOH in hexane, 1.0 mL/min); retention times for compound obtained using (*R,S*)-L1: 3.0 min (major), 4.5 min (minor).

NMR spectra for product from (*R,S*)-L1:

<sup>1</sup>H NMR (500 MHz, C<sub>6</sub>D<sub>6</sub>, 60 °C) δ 4.90 (td, *J* = 7.4, 1.9 Hz, 1H), 4.60 (d, *J* = 8.9 Hz, 1H), 4.08 (s, 1H), 3.96 (s, 1H), 2.02 (t, *J* = 6.9 Hz, 3H), 1.75 (dddd, *J* = 13.2, 11.5, 6.9, 4.5 Hz, 1H), 1.65 – 1.54 (m, 2H), 1.44 (s, 9H), 1.39 – 1.34 (m, 1H), 1.29 – 1.24 (m, 3H), 1.17 (dd, *J* = 7.4, 2.1 Hz, 18H), 1.03 (d, *J* = 6.5 Hz, 3H), 0.95 (t, *J* = 6.7 Hz, 9H).

<sup>13</sup>C NMR (126 MHz, C<sub>6</sub>D<sub>6</sub>, 60 °C) δ 205.8, 155.1, 95.6, 87.7, 77.5, 71.5, 52.1, 43.0, 37.3, 28.3, 27.6, 24.4, 22.8, 21.5, 21.4, 21.2, 18.1, 18.0, 11.2.

NMR spectra for product from (*S,R*)-L1:

<sup>1</sup>H NMR (500 MHz, C<sub>6</sub>D<sub>6</sub>, 60 °C) δ 4.86 (td, *J* = 7.5, 2.3 Hz, 2H), 4.38 (s, 1H), 4.06 (dd, *J* = 14.0, 6.9 Hz, 1H), 2.09 (d, *J* = 5.8 Hz, 1H), 1.94 (dd, *J* = 10.7, 4.1 Hz, 2H), 1.80 – 1.69 (m, 1H), 1.58 (dt, *J* = 13.4, 6.7 Hz, 1H), 1.53 – 1.49 (m, 1H), 1.44 (s, 9H), 1.31 (dq, *J* = 14.1, 7.1 Hz, 3H), 1.18 (dd, *J* = 7.4, 1.4 Hz, 18H), 1.03 (d, *J* = 6.5 Hz, 3H), 0.95 (d, *J* = 6.7 Hz, 3H), 0.89 (t, *J* = 6.6 Hz, 6H).

<sup>13</sup>C NMR (126 MHz, C<sub>6</sub>D<sub>6</sub>, 60 °C) δ 205.9, 155.0, 95.0, 86.9, 77.8, 72.5, 53.0, 37.3, 36.4, 28.3, 27.5, 24.3, 23.2, 21.4 (two carbons), 21.1, 18.1 (two carbons), 11.2.

HRMS (ESI) *m/z* [*M* – H<sub>2</sub>O + H]<sup>+</sup> calcd for C<sub>27</sub>H<sub>52</sub>SiNO<sub>2</sub>: 450.3767, found: 450.3768.

[α]<sub>D</sub><sup>24</sup> = –61.6 (*c* = 0.5, CHCl<sub>3</sub>); 99:1 dr, from (*R,S*)-L1.

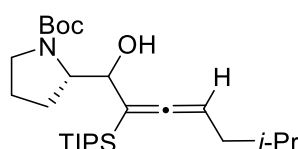

***tert*-butyl (2*S*)-2-(1-hydroxy-6-methyl-2-(triisopropylsilyl)hepta-2,3-dien-1-yl)pyrrolidine-1-carboxylate (Figure 3, entry 48&49).** The title compound was prepared according to the GP-3 from *tert*-butyl (*S*)-2-formylpyrrolidine-1-carboxylate, enyne **1** and DHP ester **2**, purified by flash column chromatography on silica gel: 10→15% EtOAc in hexanes.

(*R,S*)-L1: 93 mg, 52% yield, 99:1 dr; (*S,R*)-L1: 81 mg, 45% yield, 1:99 dr.

HPLC analysis: The dr was determined on a CHIRALPAK AD-3 column (5% *i*-PrOH in hexane, 1.0 mL/min); retention times for compound obtained using (*R,S*)-L1: 3.2 min (major), 3.5 min (minor).

NMR spectra for product from (*R,S*)-L1:

<sup>1</sup>H NMR (500 MHz, C<sub>6</sub>D<sub>6</sub>, 60 °C) δ 4.88 (brs, 1H), 4.77 (td, *J* = 7.4, 3.0 Hz, 1H), 4.24 – 4.14 (m, 1H), 3.47 (s, 1H), 3.32 (dt, *J* = 10.6, 6.9 Hz, 1H), 2.05 (dt, *J* = 12.6, 6.3 Hz, 1H), 1.98 – 1.86 (m, 2H), 1.78 – 1.64 (m, 2H), 1.63 – 1.51 (m, 1H), 1.48 (s, 9H), 1.43 – 1.33 (m, 5H), 1.23 (dd, *J* = 11.2, 7.4 Hz, 18H), 0.88 (d, *J* = 6.6 Hz, 6H).

$^{13}\text{C}$  NMR (126 MHz,  $\text{C}_6\text{D}_6$ , 60 °C)  $\delta$  206.2, 154.0, 94.0, 85.2, 78.0, 70.2, 61.7, 47.1, 37.5, 28.4, 27.7, 25.4, 23.7, 21.5, 21.3, 18.2 (two carbons), 11.3.

NMR spectra for product from (*S,R*)-L1:

$^1\text{H}$  NMR (500 MHz,  $\text{C}_6\text{D}_6$ , 60 °C)  $\delta$  4.89 (s, 1H), 4.79 (td,  $J = 7.4, 2.8$  Hz, 1H), 4.19 – 4.10 (m, 1H), 3.48 (s, 1H), 3.36 (dt,  $J = 10.5, 7.0$  Hz, 1H), 2.11 – 2.00 (m, 1H), 1.97 – 1.86 (m, 2H), 1.82 – 1.65 (m, 2H), 1.56 (td,  $J = 13.3, 6.6$  Hz, 1H), 1.47 (s, 9H), 1.42 – 1.32 (m, 4H), 1.21 (dd,  $J = 9.5, 7.5$  Hz, 18H), 0.88 (d,  $J = 6.7$  Hz, 6H).

$^{13}\text{C}$  NMR (126 MHz,  $\text{C}_6\text{D}_6$ , 60 °C)  $\delta$  206.1, 153.9, 94.4, 85.6, 77.9, 70.0, 61.3, 47.1, 37.4, 28.3, 27.7, 24.9, 23.7, 21.5, 21.3, 18.2 (two carbons), 11.4.

HRMS (ESI)  $m/z$   $[\text{M} - \text{H}_2\text{O} + \text{H}]^+$  calcd for  $\text{C}_{26}\text{H}_{48}\text{SiNO}_2$ : 434.3454, found: 434.3459.

$[\alpha]^{24}_{\text{D}} = -101.6$  ( $c = 0.5$ ,  $\text{CHCl}_3$ ); 99:1 dr, from (*R,S*)-L1.

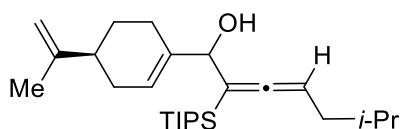

**6-methyl-1-((*S*)-4-(prop-1-en-2-yl)cyclohex-1-en-1-yl)-2-(triisopropylsilyl)hepta-2,3-dien-1-ol (Figure 3, entry 50&51).** The title compound was prepared according to the GP-3 from (*S*)-4-(prop-1-en-2-yl)cyclohex-1-ene-1-carbaldehyde, enyne 1 and DHP ester 2, purified by flash column chromatography on silica gel: 5→10% EtOAc in hexanes.

(*R,S*)-L1: 137 mg, 85% yield, 99:1 dr; (*S,R*)-L1: 138 mg, 86% yield, 1:99 dr.

HPLC analysis: The dr was determined on a CHIRALCEL OD-3 column (1% *i*-PrOH in hexane, 1.0 mL/min); retention times for compound obtained using (*R,S*)-L1: 3.6 min (major), 3.8 min (minor).

NMR spectra for product from (*R,S*)-L1:

$^1\text{H}$  NMR (500 MHz,  $\text{CDCl}_3$ )  $\delta$  5.73 (d,  $J = 2.2$  Hz, 1H), 5.07 (td,  $J = 7.7, 2.1$  Hz, 1H), 4.71 (dd,  $J = 6.8, 1.1$  Hz, 2H), 4.48 (s, 1H), 2.22 – 1.83 (m, 9H), 1.73 (s, 3H), 1.66 (dt,  $J = 13.3, 6.7$  Hz, 1H), 1.42 (ddd,  $J = 24.1, 11.7, 5.5$  Hz, 1H), 1.21 – 1.13 (m, 3H), 1.08 (d,  $J = 7.2$  Hz, 9H), 1.05 (d,  $J = 7.3$  Hz, 9H), 0.94 (d,  $J = 6.6$  Hz, 6H).

$^{13}\text{C}$  NMR (126 MHz,  $\text{CDCl}_3$ )  $\delta$  205.8, 150.0, 138.4, 123.9, 108.5, 96.0, 88.6, 74.2, 41.2, 38.2, 30.6, 29.1, 27.5, 23.6, 22.4, 22.2, 20.8, 18.7, 18.6, 11.6.

NMR spectra for product from (*S,R*)-L1:

$^1\text{H}$  NMR (500 MHz,  $\text{CDCl}_3$ )  $\delta$  5.72 (s, 1H), 5.08 (td,  $J = 7.5, 2.0$  Hz, 1H), 4.71 (s, 2H), 4.47 (s, 1H), 2.21 – 1.82 (m, 9H), 1.73 (s, 3H), 1.66 (tt,  $J = 13.4, 6.8$  Hz, 1H), 1.46 (qd,  $J = 11.9, 5.4$  Hz, 1H), 1.21 – 1.13 (m, 3H), 1.09 (d,  $J = 7.2$  Hz, 9H), 1.05 (d,  $J = 7.3$  Hz, 9H), 0.94 (dd,  $J = 6.6, 1.6$  Hz, 6H).

$^{13}\text{C}$  NMR (126 MHz,  $\text{CDCl}_3$ )  $\delta$  205.8, 149.9, 138.5, 124.4, 108.6, 95.8, 88.7, 73.9, 41.2, 38.2, 30.7, 29.1, 27.7, 23.6, 22.4, 22.3, 20.7, 18.8, 18.6, 11.7.

HRMS (ESI)  $m/z$   $[\text{M} - \text{H}_2\text{O} + \text{H}]^+$  calcd for  $\text{C}_{26}\text{H}_{45}\text{Si}$ : 385.3290, found: 385.3307.

$[\alpha]^{24}_{\text{D}} = -98.4$  ( $c = 0.5$ ,  $\text{CHCl}_3$ ); 99:1 dr, from (*R,S*)-L1.

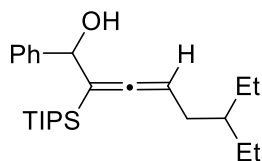

**6-ethyl-1-phenyl-2-(triisopropylsilyl)octa-2,3-dien-1-ol** (Figure 4, entry 52). The title compound was prepared according to the GP-3 from benzaldehyde, enyne **1** and DHP ester **S1**, purified by flash column chromatography on silica gel: 5→10% EtOAc in hexanes, colorless liquid.

(*R,S*)-L1: 137 mg, 89% yield, 20:1 dr, 95% ee; (*S,R*)-L1: 137 mg, 89% yield, 20:1 dr, 94% ee.

HPLC analysis: The ee was determined on a CHIRALCEL OD-3 column (5% *i*-PrOH in hexane, 1.0 mL/min); retention times for compound obtained using (*R,S*)-L1: 3.5 min (major), 4.4 min (minor).

$^1\text{H}$  NMR (500 MHz,  $\text{CDCl}_3$ )  $\delta$  7.39 – 7.35 (m, 2H), 7.31 (t,  $J = 7.5$  Hz, 2H), 7.26 – 7.22 (m, 1H), 5.16 – 5.11 (m, 1H), 5.10 – 5.04 (m, 1H), 2.31 (d,  $J = 6.0$  Hz, 1H), 2.07 – 1.93 (m, 2H), 1.31 – 1.23 (m, 4H), 1.22 – 1.10 (m, 4H), 1.06 (d,  $J = 7.0$  Hz, 9H), 0.93 (d,  $J = 7.2$  Hz, 9H), 0.84 (td,  $J = 7.4, 1.2$  Hz, 6H).

$^{13}\text{C}$  NMR (126 MHz,  $\text{CDCl}_3$ )  $\delta$  206.7, 143.6, 128.2, 127.6, 127.3, 98.1, 88.7, 72.8, 41.5, 32.2, 25.4, 25.3, 18.7, 18.5, 11.7, 11.1, 11.0.

HRMS (ESI)  $m/z$   $[\text{M} - \text{H}_2\text{O} + \text{H}]^+$  calcd for  $\text{C}_{25}\text{H}_{41}\text{Si}$ : 369.2978, found: 369.2933.  $[\alpha]^{24}_{\text{D}} = -129.6$  ( $c = 0.5$ ,  $\text{CHCl}_3$ ); 95% ee, from (*R,S*)-L1.

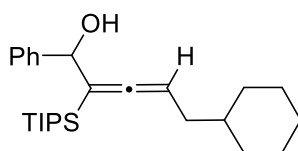

**5-cyclohexyl-1-phenyl-2-(triisopropylsilyl)penta-2,3-dien-1-ol** (Figure 4, entry 53). The title compound was prepared according to the GP-3 from benzaldehyde, enyne **1** and DHP ester **S2**, purified by flash column chromatography on silica gel: 5→10% EtOAc in hexanes, colorless liquid.

(*R,S*)-L1: 119 mg, 75% yield, 18:1 dr, 95% ee; (*S,R*)-L1: 119 mg, 75% yield, 18:1 dr, 94% ee.

HPLC analysis: The ee was determined on a CHIRALCEL OD-3 column (5% *i*-PrOH in hexane, 1.0 mL/min); retention times for compound obtained using (*R,S*)-L1: 3.7 min (major), 5.3 min (minor).

$^1\text{H}$  NMR (500 MHz,  $\text{CDCl}_3$ )  $\delta$  7.39 – 7.34 (m, 2H), 7.31 (dd,  $J = 10.2, 4.8$  Hz, 2H), 7.24 (ddd,  $J = 7.3, 4.0, 1.3$  Hz, 1H), 5.12 (s, 1H), 5.06 (ddd,  $J = 9.1, 7.1, 2.1$  Hz, 1H), 2.34 (s, 1H), 2.01 – 1.83 (m, 2H), 1.71 – 1.62 (m, 5H), 1.23 – 1.09 (m, 7H), 1.06 (d,  $J = 7.3$  Hz, 9H), 0.93 (t,  $J = 8.8$  Hz, 9H), 0.91 – 0.78 (m, 2H).

$^{13}\text{C}$  NMR (126 MHz,  $\text{CDCl}_3$ )  $\delta$  206.6, 143.6, 128.1, 127.5, 127.1, 98.0, 88.7, 72.7,

38.5, 36.6, 33.1, 33.0, 26.4, 26.3, 26.2, 18.7, 18.4, 11.6.

HRMS (ESI)  $m/z$   $[M - H_2O + H]^+$  calcd for  $C_{26}H_{41}Si$ : 381.2978, found: 381.3005.  
 $[\alpha]^{25}_D = -139.6$  ( $c = 0.5$ ,  $CHCl_3$ ); 95% ee, from (*R,S*)-L1.

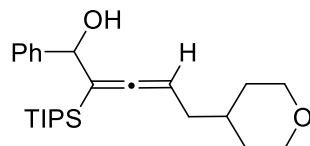

**1-phenyl-5-(tetrahydro-2H-pyran-4-yl)-2-(triisopropylsilyl)penta-2,3-dien-1-ol (Figure 4, entry 54).** The title compound was prepared according to the GP-3 from benzaldehyde, enyne 1 and DHP ester S3, purified by flash column chromatography on silica gel: 10→15% EtOAc in hexanes, colorless liquid.

(*R,S*)-L1: 75 mg, 47% yield, 15:1 dr, 93% ee; (*S,R*)-L1: 75 mg, 47% yield, 15:1 dr, 92% ee.

HPLC analysis: The ee was determined on a CHIRALPAK AD-3 column (3% *i*-PrOH in hexane, 1.0 mL/min); retention times for compound obtained using (*R,S*)-L1: 9.9 min (major), 10.7 min (minor).

$^1H$  NMR (500 MHz,  $CDCl_3$ )  $\delta$  7.37 – 7.33 (m, 2H), 7.33 – 7.28 (m, 2H), 7.24 (ddt,  $J = 5.2, 3.9, 2.0$  Hz, 1H), 5.16 (s, 1H), 4.97 (ddd,  $J = 8.8, 7.0, 2.1$  Hz, 1H), 3.94 – 3.83 (m, 2H), 3.29 (tdd,  $J = 11.7, 6.7, 2.1$  Hz, 2H), 2.34 (d,  $J = 4.4$  Hz, 1H), 1.91 (ddq,  $J = 14.1, 8.1, 7.0$  Hz, 2H), 1.54 – 1.43 (m, 2H), 1.40 – 1.30 (m, 1H), 1.24 – 1.11 (m, 5H), 1.07 (d,  $J = 7.3$  Hz, 9H), 0.97 (d,  $J = 7.3$  Hz, 9H).

$^{13}C$  NMR (126 MHz,  $CDCl_3$ )  $\delta$  207.3, 143.6, 128.1, 127.5, 127.0, 98.3, 87.1, 72.8, 67.9 (two carbons), 36.0, 35.7, 32.7, 32.6, 18.6, 18.5, 11.6.

HRMS (ESI)  $m/z$   $[M + Na]^+$  calcd for  $C_{25}H_{40}SiO_2Na$ : 423.2695, found: 423.2695.  
 $[\alpha]^{25}_D = -110.4$  ( $c = 0.5$ ,  $CHCl_3$ ); 93% ee, from (*R,S*)-L1.

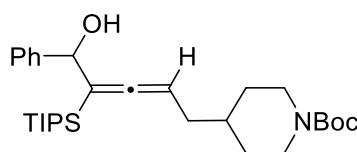

**tert-butyl 4-(5-hydroxy-5-phenyl-4-(triisopropylsilyl)penta-2,3-dien-1-yl)piperidine-1-carboxylate (Figure 4, entry 55).** The title compound was prepared according to the GP-3 from benzaldehyde, enyne 1 and DHP ester S4, purified by flash column chromatography on silica gel: 10→15% EtOAc in hexanes, colorless liquid.

(*R,S*)-L1: 93 mg, 47% yield, 15:1 dr, 92% ee; (*S,R*)-L1: 93 mg, 47% yield, 15:1 dr, 92% ee.

HPLC analysis: The ee was determined on a CHIRALPAK AD-3 column (3% *i*-PrOH in hexane, 1.0 mL/min); retention times for compound obtained using (*R,S*)-L1: 14.3 min (major), 11.3 min (minor).

$^1\text{H}$  NMR (500 MHz,  $\text{CDCl}_3$ )  $\delta$  7.37 – 7.32 (m, 2H), 7.32 – 7.28 (m, 2H), 7.26 – 7.22 (m, 1H), 5.16 (s, 1H), 4.99 – 4.92 (m, 1H), 4.02 (s, 2H), 2.59 (s, 2H), 2.26 (s, 1H), 1.98 – 1.81 (m, 2H), 1.59 – 1.48 (m, 2H), 1.45 (s, 9H), 1.25 (ddt,  $J = 14.8, 11.4, 3.8$  Hz, 1H), 1.19 – 1.10 (m, 3H), 1.07 (d,  $J = 7.3$  Hz, 9H), 0.97 (d,  $J = 7.3$  Hz, 9H).

$^{13}\text{C}$  NMR (126 MHz,  $\text{CDCl}_3$ )  $\delta$  207.3, 154.8, 143.6, 128.1, 127.5, 127.0, 98.4, 87.2, 79.2, 72.8, 43.9, 43.6, 36.8, 35.6, 31.7, 29.6, 28.4, 18.7, 18.5, 11.6.

HRMS (ESI)  $m/z$   $[\text{M} + \text{Na}]^+$  calcd for  $\text{C}_{30}\text{H}_{49}\text{SiNO}_3\text{Na}$ : 522.3380, found: 522.3381.

$[\alpha]^{24}_{\text{D}} = -91.6$  ( $c = 0.5$ ,  $\text{CHCl}_3$ ); 92% ee, from (*R,S*)-**L1**.

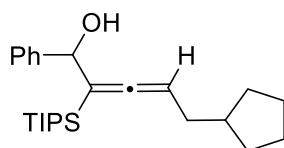

**5-cyclopentyl-1-phenyl-2-(triisopropylsilyl)penta-2,3-dien-1-ol (Figure 4, entry 56).** The title compound was prepared according to the GP-3 from benzaldehyde, enyne **1** and DHP ester **S5**, purified by flash column chromatography on silica gel: 5→10% EtOAc in hexanes, colorless liquid.

(*R,S*)-**L1**: 119 mg, 78% yield, 16:1 dr, 95% ee; (*S,R*)-**L1**: 119 mg, 78% yield, 16:1 dr, 95% ee.

HPLC analysis: The ee was determined on a CHIRALCEL OD-3 column (5% *i*-PrOH in hexane, 1.0 mL/min); retention times for compound obtained using (*R,S*)-**L1**: 3.7 min (major), 4.9 min (minor).

$^1\text{H}$  NMR (500 MHz,  $\text{CDCl}_3$ )  $\delta$  7.39 – 7.35 (m, 2H), 7.31 (dd,  $J = 10.2, 4.8$  Hz, 2H), 7.26 – 7.21 (m, 1H), 5.13 (s, 1H), 5.08 (td,  $J = 7.7, 2.1$  Hz, 1H), 2.35 (s, 1H), 2.10 – 1.97 (m, 2H), 1.85 – 1.65 (m, 3H), 1.64 – 1.45 (m, 4H), 1.18 – 1.09 (m, 5H), 1.06 (d,  $J = 7.2$  Hz, 9H), 0.93 (d,  $J = 7.3$  Hz, 9H).

$^{13}\text{C}$  NMR (126 MHz,  $\text{CDCl}_3$ )  $\delta$  206.4, 143.6, 128.1, 127.5, 127.2, 98.1, 89.6, 72.6, 40.6, 35.0, 32.3, 32.2, 25.2, 25.1, 18.7, 18.4, 11.6.

HRMS (ESI)  $m/z$   $[\text{M} - \text{H}_2\text{O} + \text{H}]^+$  calcd for  $\text{C}_{25}\text{H}_{39}\text{Si}$ : 367.2821, found: 367.2795.

$[\alpha]^{24}_{\text{D}} = -150.4$  ( $c = 0.5$ ,  $\text{CHCl}_3$ ); 95% ee, from (*R,S*)-**L1**.

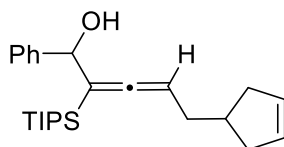

**5-(cyclopent-3-en-1-yl)-1-phenyl-2-(triisopropylsilyl)penta-2,3-dien-1-ol (Figure 4, entry 57).** The title compound was prepared according to the GP-3 from benzaldehyde, enyne **1** and DHP ester **S8**, purified by flash column chromatography on silica gel: 5→10% EtOAc in hexanes, colorless liquid.

(*R,S*)-**L1**: 99 mg, 65% yield, 16:1 dr, 92% ee; (*S,R*)-**L1**: 99 mg, 65% yield, 16:1 dr, 94% ee.

HPLC analysis: The ee was determined on a CHIRALCEL OD-3 column (5% *i*-PrOH in hexane, 1.0 mL/min); retention times for compound obtained using (*R,S*)-L1: 3.9 min (major), 5.1 min (minor).

<sup>1</sup>H NMR (500 MHz, CDCl<sub>3</sub>) δ 7.37 (d, *J* = 7.2 Hz, 2H), 7.31 (t, *J* = 7.5 Hz, 2H), 7.24 (dd, *J* = 10.1, 4.2 Hz, 1H), 5.65 – 5.60 (m, 2H), 5.14 (s, 1H), 5.08 – 5.02 (m, 1H), 2.49 – 2.36 (m, 2H), 2.31 (brs, 1H), 2.28 – 2.19 (m, 1H), 2.17 – 2.02 (m, 2H), 2.01 – 1.90 (m, 2H), 1.18 – 1.09 (m, 3H), 1.06 (d, *J* = 7.2 Hz, 9H), 0.94 (d, *J* = 7.3 Hz, 9H).

<sup>13</sup>C NMR (126 MHz, CDCl<sub>3</sub>) δ 206.8, 143.5, 129.8, 129.7, 128.2, 127.6, 127.2, 98.2, 89.0, 72.7, 38.6, 38.4, 37.6, 35.4, 18.7, 18.5, 11.7.

HRMS (ESI) *m/z* [M – H<sub>2</sub>O + H]<sup>+</sup> calcd for C<sub>25</sub>H<sub>37</sub>Si: 365.2664, found: 365.2664. [α]<sup>24</sup><sub>D</sub> = –130.0 (*c* = 0.5, CHCl<sub>3</sub>); 92% ee, from (*R,S*)-L1.

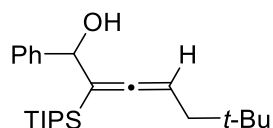

**6,6-dimethyl-1-phenyl-2-(triisopropylsilyl)hepta-2,3-dien-1-ol (Figure 4, entry 58).** The title compound was prepared according to the GP-3 from benzaldehyde, enyne **1** and DHP ester **S6**, purified by flash column chromatography on silica gel: 5→10% EtOAc in hexanes, colorless liquid.

(*R,S*)-L1: 132 mg, 89% yield, >20:1 dr, 96% ee; (*S,R*)-L1: 130 mg, 88% yield, >20:1 dr, 96% ee.

HPLC analysis: The ee was determined on a CHIRALCEL OD-3 column (5% *i*-PrOH in hexane, 1.0 mL/min); retention times for compound obtained using (*R,S*)-L1: 3.4 min (major), 3.9 min (minor).

<sup>1</sup>H NMR (500 MHz, CDCl<sub>3</sub>) δ 7.40 – 7.34 (m, 2H), 7.31 (dd, *J* = 10.2, 4.8 Hz, 2H), 7.27 – 7.21 (m, 1H), 5.15 – 5.09 (m, 2H), 2.33 (s, 1H), 2.03 – 1.90 (m, 2H), 1.16 – 1.09 (m, 3H), 1.06 (d, *J* = 7.0 Hz, 9H), 0.92 (d, *J* = 7.2 Hz, 9H), 0.88 (s, 9H).

<sup>13</sup>C NMR (126 MHz, CDCl<sub>3</sub>) δ 206.8, 143.5, 128.2, 127.6, 127.3, 97.6, 87.1, 72.7, 43.3, 31.0, 29.2, 18.7, 18.4, 11.6.

HRMS (ESI) *m/z* [M – H<sub>2</sub>O + H]<sup>+</sup> calcd for C<sub>24</sub>H<sub>39</sub>Si: 355.2821, found: 355.2810. [α]<sup>24</sup><sub>D</sub> = –154.8 (*c* = 0.5, CHCl<sub>3</sub>); 96% ee, from (*R,S*)-L1.

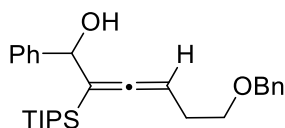

**6-(benzyloxy)-1-phenyl-2-(triisopropylsilyl)hexa-2,3-dien-1-ol (Figure 4, entry 59a).** The title compound was prepared according to the GP-3 from benzaldehyde, enyne **1** and DHP ester **S7**, purified by flash column chromatography on silica gel: 5→10% EtOAc in hexanes, colorless liquid.

(*R,S*)-L1: 73 mg, 42% yield, >20:1 dr, 84% ee; (*S,R*)-L1: 72 mg, 42% yield, >20:1

dr, 86% ee.

HPLC analysis: The ee was determined on a CHIRALCEL OD-3 column (10% *i*-PrOH in hexane, 1.0 mL/min); retention times for compound obtained using (*R,S*)-L1: 4.8 min (major), 6.2 min (minor).

<sup>1</sup>H NMR (500 MHz, CDCl<sub>3</sub>) δ 7.40 – 7.17 (m, 10H), 5.16 – 5.07 (m, 2H), 4.47 (s, 2H), 3.44 – 3.31 (m, 2H), 2.67 (d, *J* = 6.9 Hz, 1H), 2.40 – 2.19 (m, 2H), 1.15 – 1.08 (m, 3H), 1.05 (d, *J* = 6.9 Hz, 9H), 0.92 (d, *J* = 7.1 Hz, 9H).

<sup>13</sup>C NMR (126 MHz, CDCl<sub>3</sub>) δ 207.2, 143.7, 138.2, 128.3, 128.1, 127.7, 127.6, 127.5, 127.1, 98.9, 86.3, 72.9, 72.7, 69.6, 29.4, 18.6, 18.4, 11.6.

HRMS (ESI) *m/z* [M – H<sub>2</sub>O + H]<sup>+</sup> calcd for C<sub>28</sub>H<sub>39</sub>SiO: 419.2770, found: 419.2771.

[α]<sup>24</sup><sub>D</sub> = –122.4 (*c* = 0.5, CHCl<sub>3</sub>); 85% ee, from (*R,S*)-L1.

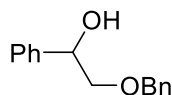

**2-(benzyloxy)-1-phenylethan-1-ol (Figure 4, entry 59b).** The title compound was prepared according to the GP-3 from benzaldehyde, enyne 1 and DHP ester S7, purified by flash column chromatography on silica gel: 5→15% EtOAc in hexanes, colorless liquid.

(*R,S*)-L1: 25 mg, 28% yield, 76% ee; (*S,R*)-L1: 26 mg, 28% yield, 76% ee.

HPLC analysis: The ee was determined on a CHIRALCEL OD-3 column (10% *i*-PrOH in hexane, 1.0 mL/min); retention times for compound obtained using (*R,S*)-L1: 8.7 min (major), 9.6 min (minor).

<sup>1</sup>H NMR (500 MHz, CDCl<sub>3</sub>) δ 7.41 – 7.27 (m, 10H), 4.94 (d, *J* = 8.8 Hz, 1H), 4.65 – 4.57 (m, 2H), 3.65 (dd, *J* = 9.8, 3.2 Hz, 1H), 3.52 (t, *J* = 9.4 Hz, 1H), 2.85 (d, *J* = 1.7 Hz, 1H).

<sup>13</sup>C NMR (126 MHz, CDCl<sub>3</sub>) δ 140.2, 137.8, 128.5, 128.4, 127.9 (two carbons), 127.8, 126.2, 75.8, 73.4, 72.9.

The NMR data matched the reports (5).

HRMS (ESI) *m/z* [M – H<sub>2</sub>O + H]<sup>+</sup> calcd for C<sub>15</sub>H<sub>15</sub>O: 211.1123, found: 211.1106.

[α]<sup>24</sup><sub>D</sub> = +28.8 (*c* = 0.5, CHCl<sub>3</sub>); 76% ee, from (*R,S*)-L1.

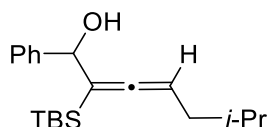

**2-(tert-butyldimethylsilyl)-6-methyl-1-phenylhepta-2,3-dien-1-ol (Figure 4, entry 60).** The title compound was prepared according to the GP-3 from benzaldehyde, enyne S9 and DHP ester 2, purified by flash column chromatography on silica gel: 5→10% EtOAc in hexanes, colorless liquid.

(*R,S*)-L1: 92 mg, 73% yield, 10:1 dr, 92% ee; (*S,R*)-L1: 99 mg, 78% yield, 10:1 dr, 91% ee.



HPLC analysis: The ee was determined on a CHIRALCEL OD-3 column (3% *i*-PrOH in hexane, 1.0 mL/min); retention times for compound obtained using (*R,S*)-L1: 4.3 min (major), 6.8 min (minor).

<sup>1</sup>H NMR (500 MHz, CDCl<sub>3</sub>) δ 7.37 – 7.29 (m, 4H), 7.28 – 7.23 (m, 1H), 5.17 – 5.14 (m, 1H), 5.12 (td, *J* = 7.5, 2.5 Hz, 1H), 2.31 (d, *J* = 5.2 Hz, 1H), 2.00 – 1.86 (m, 2H), 1.62 (td, *J* = 13.3, 6.7 Hz, 1H), 0.90 (t, *J* = 6.9 Hz, 6H), 0.86 (s, 9H), 0.01 (s, 3H), -0.13 (s, 3H).

<sup>13</sup>C NMR (126 MHz, CDCl<sub>3</sub>) δ 205.6, 143.4, 128.2, 127.6, 127.1, 100.0, 89.2, 73.0, 38.1, 29.0, 26.7, 22.4, 22.2, 17.9, -5.2, -5.5.

HRMS (ESI) *m/z* [*M* – H<sub>2</sub>O + H]<sup>+</sup> calcd for C<sub>20</sub>H<sub>31</sub>Si: 299.2195, found: 299.2208. [α]<sup>24</sup><sub>D</sub> = -158.4 (*c* = 0.5, CHCl<sub>3</sub>); 92% ee, from (*R,S*)-L1.

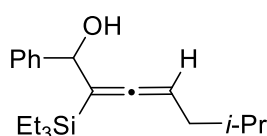

**6-methyl-1-phenyl-2-(triethylsilyl)hepta-2,3-dien-1-ol (Figure 4, entry 61).**

The title compound was prepared according to the GP-3 from benzaldehyde, enyne S10 and DHP ester 2, purified by flash column chromatography on silica gel: 5→10% EtOAc in hexanes, colorless liquid.

(*R,S*)-L1: 98 mg, 77% yield, 8:1 dr, 93% ee; (*S,R*)-L1: 93 mg, 78% yield, 8:1 dr, 94% ee.

HPLC analysis: The ee was determined on a CHIRALPAK AD-3 column (1% *i*-PrOH in hexane, 1.0 mL/min); retention times for compound obtained using (*R,S*)-L1: 8.8 min (major), 8.1 min (minor).

<sup>1</sup>H NMR (500 MHz, CDCl<sub>3</sub>) δ 7.36 – 7.30 (m, 4H), 7.28 – 7.23 (m, 1H), 5.16 – 5.09 (m, 2H), 2.38 (d, *J* = 3.2 Hz, 1H), 1.97 (t, *J* = 7.1 Hz, 2H), 1.64 (dp, *J* = 13.3, 6.7 Hz, 1H), 0.93 (dd, *J* = 6.6, 4.0 Hz, 6H), 0.84 (t, *J* = 7.9 Hz, 9H), 0.54 – 0.37 (m, 6H).

<sup>13</sup>C NMR (126 MHz, CDCl<sub>3</sub>) δ 204.4, 143.3, 128.2, 127.7, 127.0, 99.2, 88.9, 72.8, 38.4, 29.0, 22.4, 22.3, 7.2, 3.3.

HRMS (ESI) *m/z* [*M* – H<sub>2</sub>O + H]<sup>+</sup> calcd for C<sub>20</sub>H<sub>31</sub>Si: 299.2195, found: 299.2195. [α]<sup>24</sup><sub>D</sub> = -173.6 (*c* = 0.5, CHCl<sub>3</sub>); 93% ee, from (*R,S*)-L1.

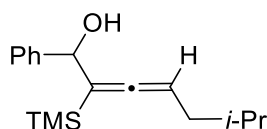

**6-methyl-1-phenyl-2-(trimethylsilyl)hepta-2,3-dien-1-ol (Figure 4, entry 62).** The title compound was prepared according to the GP-3 from benzaldehyde, enyne S11 and DHP ester 2, purified by flash column chromatography on silica gel: 5→10% EtOAc in hexanes, colorless liquid.

(*R,S*)-L1: 65 mg, 60% yield, 6:1 dr, 95% ee; (*S,R*)-L1: 65 mg, 60% yield, 6:1 dr, 95% ee.

HPLC analysis: The ee was determined on a CHIRALCEL OD-3 column (1% *i*-PrOH in hexane, 1.0 mL/min); retention times for compound obtained using (*R,S*)-L1: 6.8 min (major), 9.0 min (minor).

<sup>1</sup>H NMR (500 MHz, CDCl<sub>3</sub>) δ 7.37 – 7.30 (m, 4H), 7.29 – 7.24 (m, 1H), 5.18 (d, *J* = 2.7 Hz, 1H), 5.15 (td, *J* = 7.4, 2.8 Hz, 1H), 1.96 (t, *J* = 7.0 Hz, 2H), 1.70 – 1.58 (m, 1H), 0.93 (dd, *J* = 6.6, 4.4 Hz, 6H), -0.04 (s, 9H).

<sup>13</sup>C NMR (126 MHz, CDCl<sub>3</sub>) δ 204.6, 144.2, 129.2, 128.7, 128.1, 103.4, 90.1, 74.0, 39.2, 29.9, 23.4, 23.2, -0.0.

HRMS (ESI) *m/z* [M – H<sub>2</sub>O + H]<sup>+</sup> calcd for C<sub>17</sub>H<sub>25</sub>Si: 257.1725, found: 257.1729. [α]<sup>24</sup><sub>D</sub> = -145.6 (*c* = 0.5, CHCl<sub>3</sub>); 95% ee, from (*R,S*)-L1.

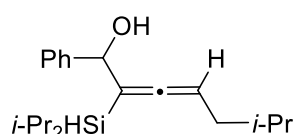

**2-(diisopropylsilyl)-6-methyl-1-phenylhepta-2,3-dien-1-ol (Figure 4, entry 63).** The title compound was prepared according to the GP-3 from benzaldehyde, enyne S15 and DHP ester 2, purified by flash column chromatography on silica gel: 5→10% EtOAc in hexanes, colorless liquid.

(*R,S*)-L1: 82 mg, 65% yield, 16:1 dr, 96% ee; (*S,R*)-L1: 82 mg, 65% yield, 16:1 dr, 94% ee.

HPLC analysis: The ee was determined on a CHIRALCEL OD-3 column (3% *i*-PrOH in hexane, 1.0 mL/min); retention times for compound obtained using (*R,S*)-L1: 4.3 min (major), 4.7 min (minor).

<sup>1</sup>H NMR (500 MHz, CDCl<sub>3</sub>) δ 7.36 – 7.29 (m, 4H), 7.27 – 7.22 (m, 1H), 5.18 (d, *J* = 2.2 Hz, 1H), 5.10 (td, *J* = 7.6, 2.7 Hz, 1H), 3.54 (s, 1H), 2.38 (s, 1H), 1.99 – 1.89 (m, 2H), 1.69 – 1.55 (m, 1H), 0.99 (d, *J* = 2.1 Hz, 3H), 0.96 – 0.89 (m, 17H).

<sup>13</sup>C NMR (126 MHz, CDCl<sub>3</sub>) δ 205.0, 143.1, 128.1, 127.6, 126.9, 97.2, 88.9, 74.1, 38.2, 28.9, 22.3, 22.2, 18.6 (two carbons), 18.5, 18.4, 11.3, 10.9.

HRMS (ESI) *m/z* [M – H<sub>2</sub>O + H]<sup>+</sup> calcd for C<sub>20</sub>H<sub>31</sub>Si: 299.2195, found: 299.2190. [α]<sup>24</sup><sub>D</sub> = -103.2 (*c* = 0.5, CHCl<sub>3</sub>); 96% ee, from (*R,S*)-L1.

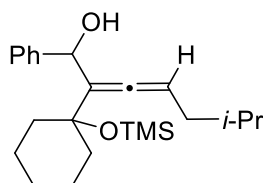

**6-Methyl-1-phenyl-2-(1-((trimethylsilyl)oxy)cyclohexyl)hepta-2,3-dien-1-ol (Figure 4, entry 64).** The title compound was prepared according to the GP-3 from benzaldehyde, enyne S16 and DHP ester 2, purified by flash column chromatography on silica gel: 5→10% EtOAc in hexanes, colorless liquid.

(*R,S*)-L1: 82 mg, 45% yield, > 20:1 dr, 97% ee; (*S,R*)-L1: 82 mg, 45% yield, >

20:1 dr, 97% ee.

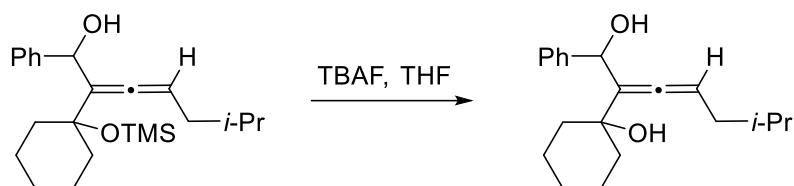

The following HPLC and NMR data were collected after deprotection by TBAF.

HPLC analysis: The ee was determined on a CHIRALCEL OD-3 column (10% *i*-PrOH in hexane, 1.0 mL/min); retention times for compound obtained using (*R,S*)-L1: 4.7 min (major), 5.0 min (minor).

<sup>1</sup>H NMR (500 MHz, CDCl<sub>3</sub>) δ 7.36 (d, *J* = 7.3 Hz, 2H), 7.30 (t, *J* = 7.6 Hz, 2H), 7.22 (t, *J* = 7.2 Hz, 1H), 5.52 (s, 1H), 5.14 (td, *J* = 7.5, 1.7 Hz, 1H), 3.25 (s, 1H), 2.16 (s, 1H), 1.89 – 1.80 (m, 1H), 1.77 – 1.68 (m, 4H), 1.67 – 1.44 (m, 6H), 1.43 – 1.27 (m, 2H), 0.77 (d, *J* = 6.6 Hz, 3H), 0.73 (d, *J* = 6.7 Hz, 3H).

<sup>13</sup>C NMR (126 MHz, CDCl<sub>3</sub>) δ 202.0, 143.2, 128.0, 127.2, 126.5, 113.8, 95.0, 73.6, 72.4, 38.2, 38.1, 37.6, 28.5, 25.6, 22.4, 22.2, 22.1.

HRMS (ESI) *m/z* [*M* – H<sub>2</sub>O + H]<sup>+</sup> calcd for C<sub>20</sub>H<sub>27</sub>O: 283.2062, found: 283.2078. [α]<sup>24</sup><sub>D</sub> = +7.2 (*c* = 0.5, CHCl<sub>3</sub>); 97% ee, from (*R,S*)-L1.

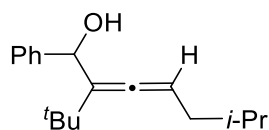

**2-(*tert*-butyl)-6-methyl-1-phenylhepta-2,3-dien-1-ol (Figure 4, entry 65).**

The title compound was prepared according to the GP-3 from benzaldehyde, enyne S12 and DHP ester 2, purified by flash column chromatography on silica gel: 5→10% EtOAc in hexanes, colorless liquid.

(*R,S*)-L1: 82 mg, 80% yield, 20:1 dr, 80% ee; (*S,R*)-L1: 81 mg, 79% yield, 20:1 dr, 78% ee.

HPLC analysis: The ee was determined on a CHIRALPAK IC-3 column (3% *i*-PrOH in hexane, 1.0 mL/min); retention times for compound obtained using (*R,S*)-L1: 5.9 min (major), 5.4 min (minor).

<sup>1</sup>H NMR (500 MHz, CDCl<sub>3</sub>) δ 7.39 – 7.34 (m, 2H), 7.30 (t, *J* = 7.5 Hz, 2H), 7.26 – 7.21 (m, 1H), 5.36 (td, *J* = 7.4, 1.2 Hz, 1H), 5.20 (s, 1H), 2.12 (brs, 1H), 1.83 (t, *J* = 7.1 Hz, 2H), 1.53 (dp, *J* = 13.3, 6.7 Hz, 1H), 1.07 (s, 9H), 0.86 (dd, *J* = 9.6, 6.7 Hz, 6H).

<sup>13</sup>C NMR (126 MHz, CDCl<sub>3</sub>) δ 200.3, 144.0, 128.1, 127.3, 126.8, 118.0, 96.0, 71.0, 38.6, 33.4, 30.0, 28.7, 22.4, 22.3.

HRMS (ESI) *m/z* [*M* – H<sub>2</sub>O + H]<sup>+</sup> calcd for C<sub>18</sub>H<sub>25</sub>: 241.1956, found: 241.1954. [α]<sup>24</sup><sub>D</sub> = –136.8 (*c* = 0.5, CHCl<sub>3</sub>); 80% ee, from (*R,S*)-L1.

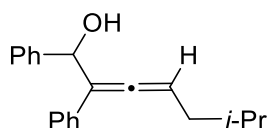

**6-methyl-1,2-diphenylhepta-2,3-dien-1-ol (Figure 4, entry 66).** The title compound was prepared according to the **GP-3** from benzaldehyde, enyne **S13** and DHP ester **2**, purified by flash column chromatography on silica gel: 5→10% EtOAc in hexanes, colorless liquid.

(*R,S*)-**L1**: 70 mg, 63% yield, 11:1 dr, 98% ee; (*S,R*)-**L1**: 70 mg, 63% yield, 11:1 dr, 98% ee.

HPLC analysis: The ee was determined on a CHIRALPAK AS-3 column (5% *i*-PrOH in hexane, 1.0 mL/min); retention times for compound obtained using (*R,S*)-**L1**: 5.1 min (major), 4.8 min (minor).

<sup>1</sup>H NMR (600 MHz, CDCl<sub>3</sub>) δ 7.44 (d, *J* = 7.2 Hz, 2H), 7.38 – 7.34 (m, 2H), 7.32 (t, *J* = 7.6 Hz, 2H), 7.27 – 7.22 (m, 3H), 7.16 (t, *J* = 7.4 Hz, 1H), 5.71 – 5.64 (m, 2H), 2.32 (d, *J* = 3.7 Hz, 1H), 2.05 – 1.94 (m, 2H), 1.65 (dp, *J* = 13.3, 6.7 Hz, 1H), 0.91 (dd, *J* = 11.5, 6.7 Hz, 6H).

<sup>13</sup>C NMR (151 MHz, CDCl<sub>3</sub>) δ 203.0, 142.1, 134.8, 128.2, 128.1, 127.5, 126.7, 126.6 (two carbons), 109.8, 96.7, 72.3, 38.1, 28.3, 22.1 (two carbons).

HRMS (ESI) *m/z* [M – H<sub>2</sub>O + H]<sup>+</sup> calcd for C<sub>20</sub>H<sub>21</sub>: 261.1643, found: 261.1622. [α]<sub>D</sub><sup>24</sup> = –46.8 (*c* = 0.5, CHCl<sub>3</sub>); 98% ee, from (*R,S*)-**L1**.

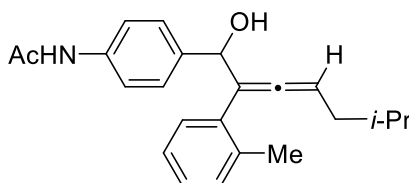

**N-(4-(1-hydroxy-6-methyl-2-(*o*-tolyl)hepta-2,3-dien-1-yl)phenyl)acetamide (Figure 4, entry 67).** The title compound was prepared according to the **GP-3** from *N*-(4-formylphenyl)acetamide, enyne **S14** and DHP ester **2**, purified by flash column chromatography on silica gel: 20→50% EtOAc in hexanes, colorless liquid.

(*R,S*)-**L1**: 95 mg, 68% yield, 7:1 dr, 96% ee; (*S,R*)-**L1**: 97 mg, 69% yield, 7:1 dr, 95% ee.

SFC analysis: The ee was determined on a CHIRALCEL IG-3 column (20% *i*-PrOH in CO<sub>2</sub>, 2.0 mL/min); retention times for compound obtained using (*R,S*)-**L1**: 3.9 min (major), 3.0 min (minor).

<sup>1</sup>H NMR (500 MHz, CDCl<sub>3</sub>) δ 7.40 (d, *J* = 8.4 Hz, 2H), 7.20 (d, *J* = 8.4 Hz, 2H), 7.15 – 7.03 (m, 5H), 5.48 (td, *J* = 7.5, 2.7 Hz, 1H), 5.35 (s, 1H), 2.40 (brs, 1H), 2.18 – 2.12 (m, 6H), 2.04 – 1.97 (m, 2H), 1.67 (dp, *J* = 13.4, 6.7 Hz, 1H), 0.92 (dd, *J* = 6.6, 5.1 Hz, 6H).

<sup>13</sup>C NMR (126 MHz, CDCl<sub>3</sub>) δ 200.1, 168.1, 137.9, 137.3, 136.5, 134.8, 132.0, 130.3, 128.9, 127.3, 125.6, 119.2, 108.7, 95.1, 74.2, 38.1, 28.6, 24.7, 22.3 (two carbons), 20.1.

HRMS (ESI)  $m/z$   $[M - H_2O + H]^+$  calcd for  $C_{23}H_{26}NO$ : 332.2014, found: 332.2052.

$[\alpha]^{25}_D = -22.0$  ( $c = 0.5$ ,  $CHCl_3$ ); 96% ee, from (*R,S*)-L1.

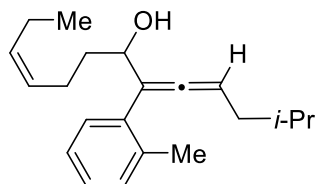

**(*Z*)-12-methyl-8-(*o*-tolyl)trideca-3,8,9-trien-7-ol (Figure 4, entry 68).** The title compound was prepared according to the GP-3 from (*Z*)-hept-4-enal, enyne S14 and DHP ester 2, purified by flash column chromatography on silica gel: 5→10% EtOAc in hexanes, colorless liquid.

(*R,S*)-L1: 78 mg, 65% yield, 4:1 dr, 93% ee; (*S,R*)-L1: 78 mg, 65% yield, 4:1 dr, 95% ee.

HPLC analysis: The ee was determined on a CHIRALPAK IC-3 column (5% *i*-PrOH in hexane, 1.0 mL/min); retention times for compound obtained using (*R,S*)-L1: 4.3 min (major), 4.0 min (minor).

$^1H$  NMR (500 MHz,  $CDCl_3$ )  $\delta$  7.25 – 7.15 (m, 4H), 5.46 – 5.35 (m, 2H), 5.30 (ddd,  $J = 10.7, 9.8, 7.2$  Hz, 1H), 4.41 – 4.34 (m, 1H), 2.35 (s, 3H), 2.27 – 2.10 (m, 2H), 2.09 – 1.97 (m, 4H), 1.78 (d,  $J = 5.5$  Hz, 1H), 1.75 – 1.64 (m, 2H), 1.61 – 1.49 (m, 1H), 0.94 (dd,  $J = 10.2, 4.2$  Hz, 9H).

$^{13}C$  NMR (126 MHz,  $CDCl_3$ )  $\delta$  200.6, 136.4, 135.6, 132.3, 130.5, 128.6, 128.4, 127.2, 125.8, 108.5, 94.2, 71.7, 38.3, 36.0, 28.7, 23.4, 22.4, 22.3, 20.5, 20.4, 14.4.

HRMS (ESI)  $m/z$   $[M - H_2O + H]^+$  calcd for  $C_{21}H_{29}$ : 281.2269, found: 281.2267.  $[\alpha]^{25}_D = -60.4$  ( $c = 0.5$ ,  $CHCl_3$ ); 93% ee, from (*R,S*)-L1.

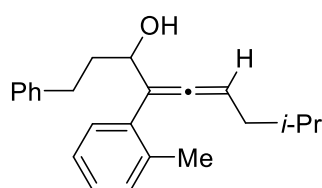

**8-methyl-1-phenyl-4-(*o*-tolyl)nona-4,5-dien-3-ol (Figure 4, entry 69).** The title compound was prepared according to the GP-3 from 3-phenylpropanal, enyne S14 and DHP ester 2, purified by flash column chromatography on silica gel: 5→10% EtOAc in hexanes, colorless liquid.

(*R,S*)-L1: 92 mg, 72% yield, 4:1 dr, 94% ee; (*S,R*)-L1: 92 mg, 72% yield, 4:1 dr, 94% ee.

HPLC analysis: The ee was determined on a CHIRALCEL OD-3 column (5% *i*-PrOH in hexane, 1.0 mL/min); retention times for compound obtained using (*R,S*)-L1: 6.6 min (major), 5.5 min (minor).

$^1H$  NMR (500 MHz,  $CDCl_3$ )  $\delta$  7.28 – 7.21 (m, 2H), 7.18 (ddt,  $J = 14.9, 9.4, 4.9$

Hz, 7H), 5.44 (td,  $J = 7.5, 2.5$  Hz, 1H), 4.44 – 4.36 (m, 1H), 2.90 – 2.78 (m, 1H), 2.69 (ddd,  $J = 13.7, 10.4, 6.2$  Hz, 1H), 2.33 (s, 3H), 2.03 (td,  $J = 7.2, 2.9$  Hz, 2H), 1.99 – 1.90 (m, 1H), 1.84 (d,  $J = 5.5$  Hz, 1H), 1.82 – 1.74 (m, 1H), 1.70 (td,  $J = 13.3, 6.7$  Hz, 1H), 0.96 – 0.89 (m, 6H).

$^{13}\text{C}$  NMR (126 MHz,  $\text{CDCl}_3$ )  $\delta$  200.6, 142.1, 136.4, 135.5, 130.6, 128.7, 128.5, 128.4, 127.3, 125.9, 125.8, 108.4, 94.4, 71.4, 38.3, 37.7, 32.0, 28.7, 22.4 (two carbons), 20.5.

HRMS (ESI)  $m/z$   $[\text{M} - \text{H}_2\text{O} + \text{H}]^+$  calcd for  $\text{C}_{23}\text{H}_{27}$ : 303.2113, found: 303.2112.  $[\alpha]_D^{25} = -34.8$  ( $c = 0.5$ ,  $\text{CHCl}_3$ ); 94% ee, from (*R,S*)-L1.

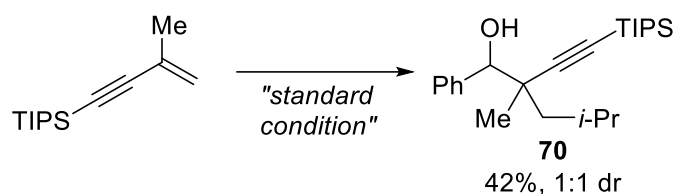

**2,4-dimethyl-1-phenyl-2-((triisopropylsilyl)ethynyl)pentan-1-ol (Figure 4, entry 70).** The title compound was prepared according to the above equation, purified by flash column chromatography on silica gel: 5→10% EtOAc in hexanes, colorless liquid.

(*R,S*)-L1: 62 mg, 42% yield, 1:1 dr; (*S,R*)-L1: 63 mg, 42% yield, 1:1 dr.

$^1\text{H}$  NMR (500 MHz,  $\text{CDCl}_3$ , mixture of two isomers)  $\delta$  7.44 – 7.37 (m, 2H), 7.34 – 7.25 (m, 3H), 4.46 (dd,  $J = 8.9, 4.4$  Hz, 1H), 2.74 (d,  $J = 4.3$  Hz, 0.5H), 2.56 (d,  $J = 4.7$  Hz, 0.5H), 1.98 – 1.82 (m, 1H), 1.63 (dd,  $J = 13.6, 5.9$  Hz, 0.5H), 1.45 (dd,  $J = 13.6, 6.2$  Hz, 0.5H), 1.27 (s, 1.5H), 1.18 (dd,  $J = 13.6, 5.7$  Hz, 0.5H), 1.07 (dt,  $J = 16.2, 4.6$  Hz, 25H), 0.98 (d,  $J = 6.7$  Hz, 1.5H), 0.94 (d,  $J = 6.7$  Hz, 1.5H), 0.90 (d,  $J = 6.7$  Hz, 1.5H).

$^{13}\text{C}$  NMR (126 MHz,  $\text{CDCl}_3$ , mixture of two isomers)  $\delta$  139.9, 139.6, 128.0 (two carbons), 127.7, 127.6 (two carbons), 127.5, 112.8, 112.7, 85.2, 84.7, 80.4, 80.0, 46.7, 44.5, 43.2, 42.8, 25.4, 25.3, 24.9 (two carbons), 24.6, 24.5, 24.0, 22.1, 18.6, 11.3.

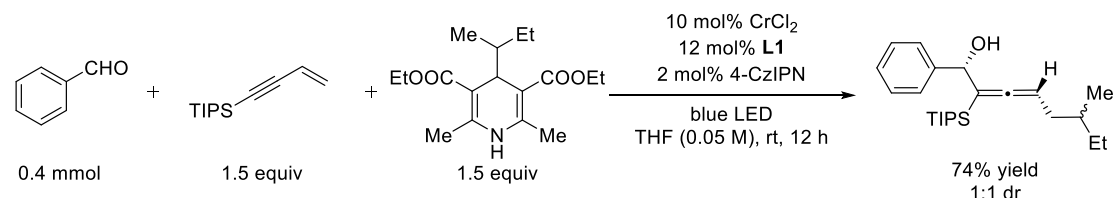

When the secondary alkyl-DHP bearing unsymmetric alkyl group was evaluated, the diastereoselectivity was low (as above showed).

$^1\text{H}$  NMR (500 MHz,  $\text{CDCl}_3$ , mixture of two isomers)  $\delta$  7.42 – 7.34 (m, 2H), 7.31 (t,  $J = 7.5$  Hz, 2H), 7.28 – 7.21 (m, 1H), 5.13 (d,  $J = 3.1$  Hz, 1H), 5.07 (t,  $J = 7.5$  Hz, 1H), 2.32 (s, 1H), 2.14 – 1.96 (m, 1H), 1.95 – 1.78 (m, 1H), 1.20 – 1.03 (m, 16H), 0.93 (dd,  $J = 7.2, 1.6$  Hz, 10H), 0.90 – 0.82 (m, 6H).

$^{13}\text{C}$  NMR (126 MHz,  $\text{CDCl}_3$ , mixture of two isomers)  $\delta$  206.8, 206.7, 143.6

(two carbons), 128.2 (two carbons), 127.6 (two carbons), 127.2 (two carbons), 98.1, 98.0, 88.8 (two carbons), 72.7 (two carbons), 35.9, 35.8, 35.5, 35.4, 29.2, 29.0, 19.2, 19.0, 18.7, 18.5, 11.7, 11.6, 11.5.

## 1.4 Other Radical Precursors and Synthetic Transformations

### General procedure 4 (GP-4): Asymmetric 1,4-functionalization of 1,3-enynes with RBF<sub>3</sub>K.

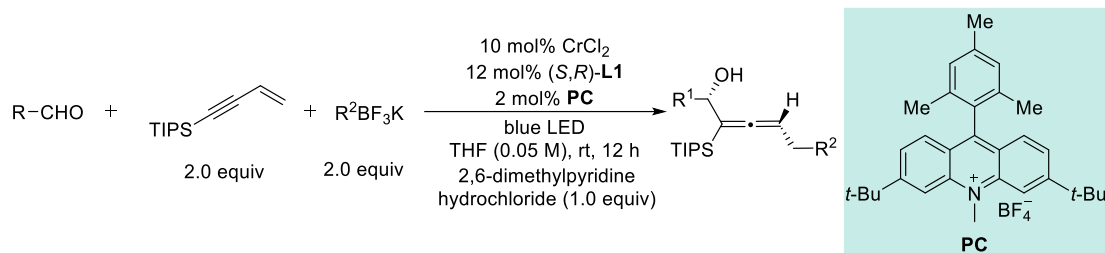

**Preparation of the catalyst solution:** In a nitrogen-filled glovebox, and oven-dried 20 mL vial with a magnetic stir bar, were charged the CrCl<sub>2</sub> (5.0 mg, 0.04 mmol, 10 mol%) and (S,R)-L1 (23.2 mg, 0.048 mmol, 12 mol%). Then 8.0 mL THF was added and the vial was closed with a PTFE septum cap, and then stirred at room temperature for 2 h.

**Catalytic asymmetric radical 1,4-functionalization of 1,3-enynes:** In a nitrogen-filled glovebox, to the prepared catalyst solution were added the 1,3-enynes (0.8 mmol, 2.0 equiv), the aldehydes (0.4 mmol, 1.0 equiv), the potassium trifluoroborate (0.8 mmol, 2.0 equiv), 2,6-dimethylpyridine hydrochloride (0.4 mmol, 1.0 equiv), and photocatalyst 3,6-di-tert-butyl-9-mesityl-10-methylacridin-10-ium tetrafluoroborate (4.1 mg, 0.008 mmol, 2 mol%) sequentially. Then the vial was closed with a PTFE septum cap, and taken out of the glovebox. Then, the reaction was irradiated with two 20 W 160-440 nm LED for 12 hours (tube 5 cm away from lights, fans for cooling, 30-35 °C). After that, the reaction mixture was concentrated and run through a short silica gel pad with hexanes/EtOAc (3:1) as the eluent. Then the solvent was removed under the reduced pressure. The diastereoselectivity was determined via <sup>1</sup>H NMR analysis of the crude reaction mixture. and the residue was purified by flash chromatography to provide the desired product and the ee was determined via HPLC analysis.

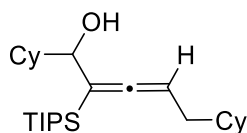

**1,5-dicyclohexyl-2-(triisopropylsilyl)penta-2,3-dien-1-ol** (Figure 5, entry 71). The title compound was prepared according to the GP-4 from cyclohexanecarbaldehyde, enyne **1** and potassium cyclohexyltrifluoroborate, purified by flash column chromatography on silica gel: 5→10% EtOAc in hexanes, colorless liquid.

(R,S)-L1: 111 mg, 69% yield, 18:1 dr, 97% ee; (S,R)-L1: 111 mg, 69% yield, 18:1 dr, 96% ee.



HPLC analysis: The ee was determined on a CHIRALCEL OD-3 column (1% *i*-PrOH in hexane, 1.0 mL/min); retention times for compound obtained using (*R,S*)-L1: 3.4 min (major), 3.6 min (minor).

<sup>1</sup>H NMR (500 MHz, CDCl<sub>3</sub>) δ 4.96 (ddd, *J* = 8.4, 6.9, 1.7 Hz, 1H), 3.78 (s, 1H), 2.00 – 1.85 (m, 3H), 1.82 – 1.61 (m, 9H), 1.30 – 1.12 (m, 11H), 1.08 (dd, *J* = 9.0, 7.4 Hz, 18H), 1.04 – 0.86 (m, 5H).

<sup>13</sup>C NMR (126 MHz, CDCl<sub>3</sub>) δ 206.2, 95.8, 87.5, 74.2, 43.3, 38.7, 36.5, 33.2, 33.1, 31.2, 26.5 (four carbons), 26.3 (two carbons), 26.2, 18.7 (two carbons), 11.7.

HRMS (ESI) *m/z* [M – H<sub>2</sub>O + H]<sup>+</sup> calcd for C<sub>26</sub>H<sub>47</sub>Si: 387.3447, found: 387.3443. [α]<sup>24</sup><sub>D</sub> = –42.0 (*c* = 0.5, CHCl<sub>3</sub>); 97% ee, from (*R,S*)-L1.

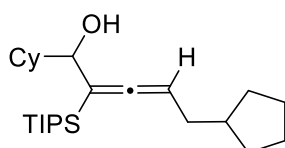

**1-cyclohexyl-5-cyclopentyl-2-(triisopropylsilyl)penta-2,3-dien-1-ol** (Figure 5, entry 72). The title compound was prepared according to the GP-4 from cyclohexanecarbaldehyde, enyne **1** and potassium cyclopentyltrifluoroborate, purified by flash column chromatography on silica gel: 5→10% EtOAc in hexanes, colorless liquid.

(*R,S*)-L1: 106 mg, 68% yield, 16:1 dr, 97% ee; (*S,R*)-L1: 106 mg, 68% yield, 16:1 dr, 98% ee.

HPLC analysis: The ee was determined on a CHIRALCEL OD-3 column (1% *i*-PrOH in hexane, 1.0 mL/min); retention times for compound obtained using (*R,S*)-L1: 3.4 min (major), 3.6 min (minor).

<sup>1</sup>H NMR (500 MHz, CDCl<sub>3</sub>) δ 5.02 – 4.94 (m, 1H), 3.79 (s, 1H), 2.11 – 1.97 (m, 2H), 1.93 – 1.81 (m, 2H), 1.82 – 1.73 (m, 4H), 1.71 – 1.57 (m, 4H), 1.56 – 1.40 (m, 4H), 1.23 – 1.12 (m, 9H), 1.11 – 1.05 (m, 18H).

<sup>13</sup>C NMR (126 MHz, CDCl<sub>3</sub>) δ 206.0, 96.0, 88.4, 74.2, 43.3, 40.7, 34.9, 32.4, 32.3, 31.2, 26.5 (three carbons), 26.2, 25.2, 25.1, 18.7 (two carbons), 11.7.

HRMS (ESI) *m/z* [M – H<sub>2</sub>O + H]<sup>+</sup> calcd for C<sub>25</sub>H<sub>45</sub>Si: 373.3290, found: 373.3282. [α]<sup>24</sup><sub>D</sub> = –36.4 (*c* = 0.5, CHCl<sub>3</sub>); 97% ee, from (*R,S*)-L1.

**General procedure 5 (GP-5): Radical Difunctionalization of 1,3-Enynes with NHPI ester.**

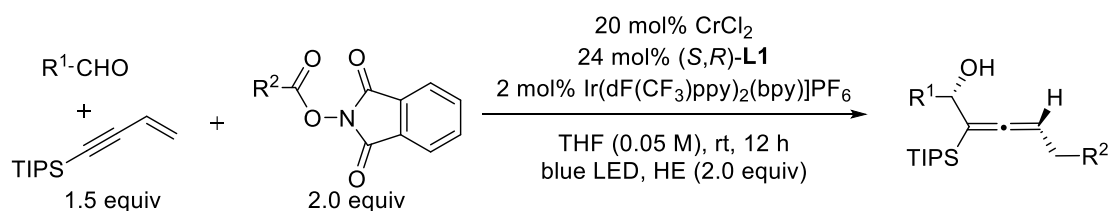

**Preparation of the catalyst solution:** In a nitrogen-filled glovebox, and oven-dried 20 mL vial with a magnetic stir bar, were charged the CrCl<sub>2</sub> (9.5 mg, 0.08 mmol, 20 mol%) and (*S,R*)-L1 (46.4 mg, 0.096 mmol, 24 mol%). Then 8.0 mL THF was added and the vial was closed with a PTFE septum cap, and then stirred at room temperature for 2 h.

**Catalytic asymmetric radical difunctionalization of 1,3-enynes:** In a nitrogen-filled glovebox, to the prepared catalyst solution were added the 1,3-enynes (0.6 mmol, 1.5 equiv), the aldehydes (0.4 mmol, 1.0 equiv), the NHPI ester (0.8 mmol, 2.0 equiv), diethyl 1,4-dihydro-2,6-dimethyl-3,5-pyridinedicarboxylate (0.8 mmol, 2.0 equiv), and photocatalyst Ir(dF(CF<sub>3</sub>)ppy)<sub>2</sub>(bpy)]PF<sub>6</sub> (8.2 mg, 0.008 mmol, 2 mol%) sequentially. Then the vial was closed with a PTFE septum cap, and taken out of the glovebox. Then, the reaction was irradiated with two 20 W 160-440 nm LED for 12 hours (tube 5 cm away from lights, fans for cooling, 30-35 °C). After that, the reaction mixture was concentrated and run through a short silica gel pad with hexanes/EtOAc (3:1) as the eluent. Then the solvent was removed under the reduced pressure. The diastereoselectivity was determined via <sup>1</sup>H NMR analysis of the crude reaction mixture. and the residue was purified by flash chromatography to provide the desired product and the ee was determined via HPLC analysis.

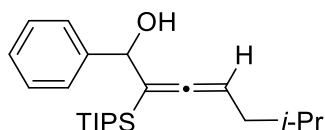

**6-methyl-1-phenyl-2-(triisopropylsilyl)hepta-2,3-dien-1-ol (Figure 5, entry 1).** The title compound was prepared according to the GP-5 from benzaldehyde, enyne **1** and NHPI ester **S17**, purified by flash column chromatography on silica gel: 5→10% EtOAc in hexanes, colorless liquid.

(*R,S*)-L1: 91 mg, 64% yield, >20:1 dr, 90% ee; (*S,R*)-L1: 91 mg, 64% yield, >20:1 dr, 90% ee.

HPLC analysis: The ee was determined on a CHIRALCEL OD-3 column (5% *i*-PrOH in hexane, 1.0 mL/min); retention times for compound obtained using (*R,S*)-L1: 3.7 min (major), 4.6 min (minor).

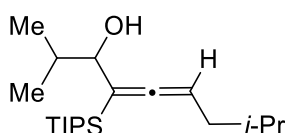

**2,8-dimethyl-4-(triisopropylsilyl)nona-4,5-dien-3-ol (Figure 5, entry 31).** The title compound was prepared according to the GP-5 from isobutyraldehyde, enyne **1** and NHPI ester **S17**, purified by flash column chromatography on silica gel: 5→10% EtOAc in hexanes, colorless liquid.

(*R,S*)-L1: 71 mg, 55% yield, 20:1 dr, 96% ee; (*S,R*)-L1: 71 mg, 55% yield, 20:1 dr, 96% ee.

HPLC analysis: The ee was determined on a CHIRALPAK OD-3 column (1% *i*-PrOH in hexane, 1.0 mL/min); retention times for compound obtained using (*R,S*)-L1: 3.5 min (major), 3.3 min (minor).

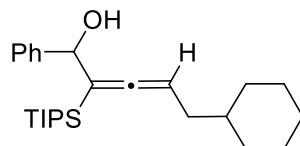

**5-cyclohexyl-1-phenyl-2-(triisopropylsilyl)penta-2,3-dien-1-ol (Figure 5, entry 53).** The title compound was prepared according to the GP-5 from benzaldehyde, enyne **1** and NHPI ester **S18**, purified by flash column chromatography on silica gel: 5→10% EtOAc in hexanes, colorless liquid.

(*R,S*)-L1: 116 mg, 73% yield, >20:1 dr, 90% ee; (*S,R*)-L1: 115 mg, 72% yield, 20:1 dr, 89% ee.

HPLC analysis: The ee was determined on a CHIRALCEL OD-3 column (5% *i*-PrOH in hexane, 1.0 mL/min); retention times for compound obtained using (*R,S*)-L1: 3.8 min (major), 5.5 min (minor).

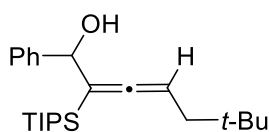

**6,6-dimethyl-1-phenyl-2-(triisopropylsilyl)hepta-2,3-dien-1-ol (Figure 5, entry 58).** The title compound was prepared according to the GP-5 from benzaldehyde, enyne **1** and NHPI ester **S19**, purified by flash column chromatography on silica gel: 5→10% EtOAc in hexanes, colorless liquid.

(*R,S*)-L1: 111 mg, 75% yield, >20:1 dr, 89% ee; (*S,R*)-L1: 110 mg, 75% yield, >20:1 dr, 89% ee.

HPLC analysis: The ee was determined on a CHIRALCEL OD-3 column (5% *i*-PrOH in hexane, 1.0 mL/min); retention times for compound obtained using (*R,S*)-L1: 3.5 min (major), 3.9 min (minor).

#### Desilylation and cyclization reaction:

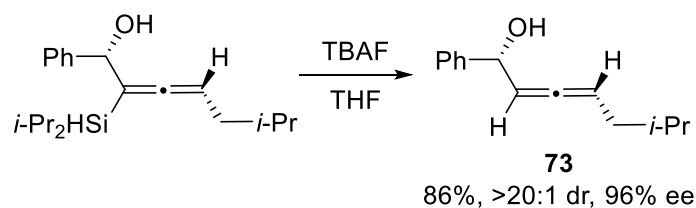

**(1*R*,3*R*)-6-methyl-1-phenylhepta-2,3-dien-1-ol (Figure 5c, 73):** A solution of the compound **63** (680 mg, 2.2 mmol, 1.0 equiv) in 15 mL THF was cooled to –78 °C, TBAF (3.3 mL, 3.3 mmol, 1.5 equiv, 1.0 M in THF) was added dropwise

under argon atmosphere. The mixture was stirred at  $-78\text{ }^{\circ}\text{C}$  for 2 h. After completion of the reaction, 1.0 mL  $\text{H}_2\text{O}$  was added cautiously at  $-78\text{ }^{\circ}\text{C}$ . The resulting mixture was extracted with  $\text{EtOAc}$  ( $2 \times 20\text{ mL}$ ), and the organic phase was combined and dried with anhydrous  $\text{MgSO}_4$ , and concentrated. The resulting mixture was purified by flash chromatography (hexanes/ethyl acetate), which furnished the compound **73**, colorless liquid, 382 mg, 86% yield,  $>20:1$  dr, 96% ee.

HPLC analysis: The ee was determined on a CHIRALPAK OD-3 column (5% *i*-PrOH in hexane, 1.0 mL/min); retention times for compound **73**: 5.6 min (major), 6.8 min (minor).

$^1\text{H}$  NMR (500 MHz,  $\text{CDCl}_3$ )  $\delta$  7.42 – 7.33 (m, 4H), 7.31 – 7.26 (m, 1H), 5.43 – 5.37 (m, 1H), 5.36 – 5.29 (m, 1H), 5.23 (dd,  $J = 6.0, 2.1\text{ Hz}$ , 1H), 2.14 (brs, 1H), 1.99 – 1.92 (m, 2H), 1.73 – 1.63 (m, 1H), 0.93 (dd,  $J = 6.6, 2.3\text{ Hz}$ , 6H).

$^{13}\text{C}$  NMR (126 MHz,  $\text{CDCl}_3$ )  $\delta$  202.7, 143.1, 128.5, 127.7, 126.2, 95.5, 93.7, 72.3, 38.3, 28.5, 22.2 (two carbons).

HRMS (ESI)  $m/z$   $[\text{M} - \text{H}_2\text{O} + \text{H}]^+$  calcd for  $\text{C}_{14}\text{H}_{17}$ : 185.1330, found: 185.1326.  $[\alpha]^{24}_{\text{D}} = -55.6$  ( $c = 0.5$ ,  $\text{CHCl}_3$ ).

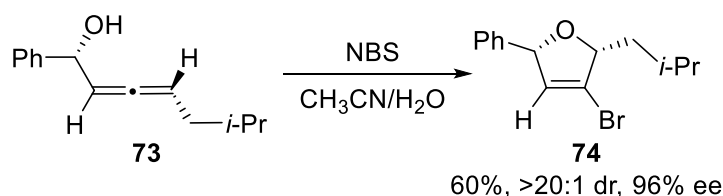

**(2R,5R)-3-bromo-2-isobutyl-5-phenyl-2,5-dihydrofuran (Figure 5c, 74):** NBS (85 mg, 0.48 mmol, 1.2 equiv) in 1.0 mL MeCN was added to the solution of the compound **73** (83 mg, 0.4 mmol, 1.0 equiv) in 2.0 mL MeCN and 0.2 mL  $\text{H}_2\text{O}$  under argon atmosphere. The mixture was stirred at rt for 4 h. After completion of the reaction, the mixture was concentrated, purified by flash chromatography (hexanes/ethyl acetate), which furnished compound **74**, colorless liquid, 67 mg, 60% yield,  $>20:1$  dr, 96% ee.

HPLC analysis: The ee was determined on a CHIRALPAK OJ-3 column (1% *i*-PrOH in hexane, 1.0 mL/min); retention times for compound **74**: 5.3 min (major), 5.5 min (minor).

$^1\text{H}$  NMR (500 MHz,  $\text{CDCl}_3$ )  $\delta$  7.36 (ddd,  $J = 7.1, 4.3, 1.6\text{ Hz}$ , 2H), 7.33 – 7.29 (m, 3H), 5.99 (t,  $J = 1.9\text{ Hz}$ , 1H), 5.70 (dd,  $J = 4.2, 1.6\text{ Hz}$ , 1H), 4.88 – 4.80 (m, 1H), 2.02 – 1.89 (m, 1H), 1.74 (ddd,  $J = 13.9, 9.3, 2.7\text{ Hz}$ , 1H), 1.58 – 1.49 (m, 1H), 0.98 (t,  $J = 6.6\text{ Hz}$ , 6H).

$^{13}\text{C}$  NMR (126 MHz,  $\text{CDCl}_3$ )  $\delta$  140.8, 129.4, 128.5, 128.1, 126.6, 121.6, 86.9, 85.6, 44.1, 24.8, 23.8, 21.6.

HRMS (ESI)  $m/z$   $[\text{M} - \text{Br}]^+$  calcd for  $\text{C}_{14}\text{H}_{17}\text{O}$ : 201.1279, found: 201.1277.  $[\alpha]^{24}_{\text{D}} = +45.6$  ( $c = 0.5$ ,  $\text{CHCl}_3$ ).

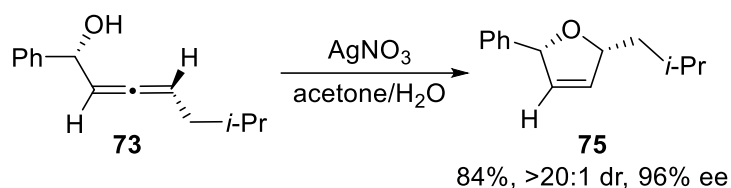

**(2R,5R)-2-isobutyl-5-phenyl-2,5-dihydrofuran (Figure 5c, 75):** The compound **73** (83 mg, 0.4 mmol, 1.0 equiv) was added to the solution of  $\text{AgNO}_3$  (13.6 mg, 0.08 mmol, 20 mol%) in 3.0 mL acetone and 2.0 mL  $\text{H}_2\text{O}$  under argon atmosphere. The mixture was stirred at rt for 12 h. After completion of the reaction, the mixture was concentrated, purified by flash chromatography (hexanes/ethyl acetate), which furnished compound **75**, colorless liquid, 68 mg, 84% yield, >20:1 dr, 96% ee.

HPLC analysis: The ee was determined on a CHIRALPAK OJ-3 column (3% *i*-PrOH in hexane, 1.0 mL/min); retention times for compound **75**: 5.4 min (major), 6.2 min (minor).

$^1\text{H}$  NMR (500 MHz,  $\text{CDCl}_3$ )  $\delta$  7.37 – 7.30 (m, 4H), 7.29 – 7.25 (m, 1H), 5.92 (ddd,  $J = 6.0, 2.3, 1.4$  Hz, 1H), 5.86 – 5.79 (m, 1H), 5.75 (dd,  $J = 4.0, 2.0$  Hz, 1H), 5.01 – 4.94 (m, 1H), 1.94 – 1.80 (m, 1H), 1.63 (ddd,  $J = 14.2, 8.1, 6.3$  Hz, 1H), 1.49 (ddd,  $J = 13.3, 7.7, 5.4$  Hz, 1H), 0.97 (d,  $J = 6.7$  Hz, 6H).

$^{13}\text{C}$  NMR (126 MHz,  $\text{CDCl}_3$ )  $\delta$  142.3, 130.8, 129.9, 128.4, 127.6, 126.5, 87.6, 84.9, 46.2, 25.2, 23.3, 22.5.

HRMS (ESI)  $m/z$   $[\text{M} + \text{H}]^+$  calcd for  $\text{C}_{14}\text{H}_{19}\text{O}$ : 203.1436, found: 203.1432.

$[\alpha]^{24}_{\text{D}} = +142.0$  ( $c = 0.5$ ,  $\text{CHCl}_3$ ).

## 1.5 Effect of Reaction Parameters

**General procedure 6 (GP-6): Asymmetric radical 1,4-functionalization of 1,3-enynes with DHP esters.**

**Preparation of the catalyst solution:** In a nitrogen-filled glovebox, and oven-dried 4 mL vial with a magnetic stir bar, were charged the CrCl<sub>2</sub> (1.3 mg, 0.01 mmol, 10 mol%) and (*S,R*)-L1 (5.8 mg, 0.012 mmol, 12 mol%). Then 2.0 mL THF was added and the vial was closed with a PTFE septum cap, and then stirred at room temperature for 2 h.

**Catalytic asymmetric radical 1,4-functionalization of 1,3-enynes:** In a nitrogen-filled glovebox, to the prepared catalyst solution were added the 1,3-enyne (0.15 mmol, 1.5 equiv), the aldehyde (0.1 mmol, 1.0 equiv), the DHP ester (0.15 mmol, 1.5 equiv), and 4-CzIPN (1.6 mg, 0.002 mmol, 2 mol%) sequentially. Then the vial was closed with a PTFE septum cap, and taken out of the glovebox. Then, the reaction was irradiated with two 20 W 160-440 nm LED for 12 hours (tube 5 cm away from lights, fans for cooling, 30-35 °C). After that, the reaction mixture was concentrated and run through a short silica gel pad with hexanes/EtOAc (3:1) as the eluent. Then the solvent was removed under the reduced pressure. The yield and diastereoselectivity were determined via <sup>1</sup>H NMR analysis of the crude reaction mixture. The ee was determined via HPLC analysis after further purification by prep-TLC.

**Supplementary Table 1 Effect of reaction parameters on the reaction of asymmetric 1,4-functionalization of 1,3-enynes<sup>a</sup>**

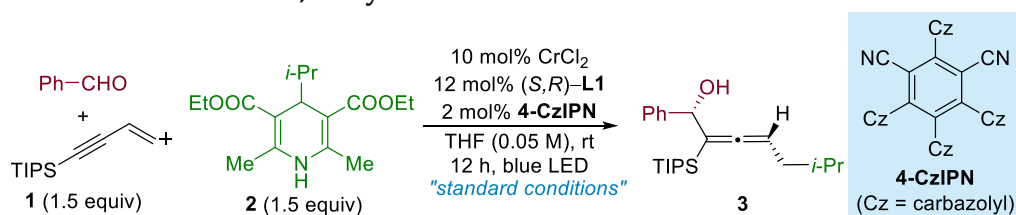

| entry | variation from "standard conditions"                                                | yield [%] | dr <sup>b</sup> | ee <sup>c</sup> [%] |
|-------|-------------------------------------------------------------------------------------|-----------|-----------------|---------------------|
| 1     | None                                                                                | >95       | 20:1            | 94                  |
| 2     | without CrCl <sub>2</sub>                                                           | <2        | –               | –                   |
| 3     | without 4-CzIPN                                                                     | <2        | –               | –                   |
| 4     | without blue LED                                                                    | <2        | –               | –                   |
| 5     | <b>L2</b> , instead of (S,R)- <b>L1</b>                                             | >95       | 20:1            | 92                  |
| 6     | <b>L3</b> , instead of (S,R)- <b>L1</b>                                             | 84        | 3.1:1           | 47                  |
| 7     | <b>L4</b> , instead of (S,R)- <b>L1</b>                                             | 68        | 1.6:1           | 19                  |
| 8     | <b>L5</b> , instead of (S,R)- <b>L1</b>                                             | 52        | 5.5:1           | 34                  |
| 9     | <b>L6</b> , instead of (S,R)- <b>L1</b>                                             | 71        | 1.8:1           | 46                  |
| 10    | <b>L7</b> , instead of (S,R)- <b>L1</b>                                             | 79        | 2.8:1           | 93                  |
| 11    | DME, instead of THF                                                                 | 72        | 10:1            | 94                  |
| 12    | MeCN, instead of THF                                                                | 85        | 20:1            | 95                  |
| 13    | EtOAc, instead of THF                                                               | >95       | 20:1            | 94                  |
| 14    | Ir(dF(CF <sub>3</sub> )ppy) <sub>2</sub> (dtbpy)]PF <sub>6</sub> instead of 4-CzIPN | >95       | 11:1            | 88                  |
| 15    | 5 mol% CrCl <sub>2</sub> , 6 mol% (S,R)- <b>L1</b>                                  | 74        | 20:1            | 94                  |
| 16    | 0.1M, instead of 0.05M, in THF                                                      | >95       | 12:1            | 93                  |
| 17    | 1.2, instead of 1.5, equiv <b>1</b> and <b>2</b>                                    | 80        | 20:1            | 94                  |
| 18    | 1.2, instead of 1.5, equiv <b>1</b>                                                 | 90        | 18:1            | 93                  |
| 19    | 1.0 equiv H <sub>2</sub> O was added                                                | <2        | –               | –                   |
| 20    | 1 mL air (added via syringe)                                                        | 55        | 14:1            | 87                  |

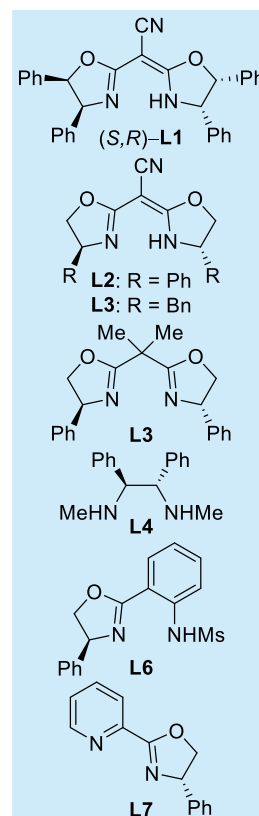

<sup>a</sup> Yields were determined via <sup>1</sup>H NMR analysis with 1,3,5-trimethoxybenzene as the internal standard. <sup>b</sup> Drs were determined via <sup>1</sup>H NMR analysis of the crude product. <sup>c</sup> Ee was determined by HPLC analysis. <sup>d</sup> The aldehyde was full consumed.

## 1.6 Preliminary Mechanistic Study

### Radical trapping experiment

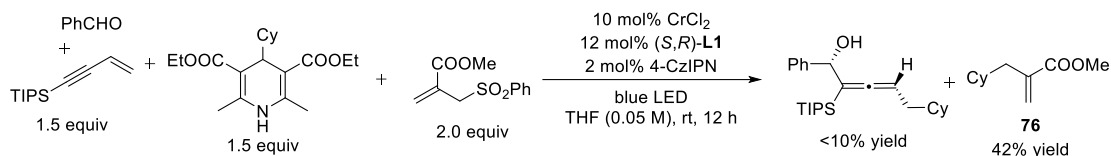

**Preparation of the catalyst solution:** In a nitrogen-filled glovebox, and oven-dried 20 mL vial with a magnetic stir bar, were charged the CrCl<sub>2</sub> (5.0 mg, 0.04 mmol, 10 mol%) and (S,R)-L1 (23.2 mg, 0.048 mmol, 12 mol%). Then 8.0 mL THF was added and the vial was closed with a PTFE septum cap, and then stirred at room temperature for 2 h.

**Catalytic asymmetric radical difunctionalization of 1,3-enynes:** In a nitrogen-filled glovebox, to the prepared catalyst solution were added the 1,3-enyne (0.6 mmol, 1.5 equiv), the aldehyde (0.4 mmol, 1.0 equiv), the DHP ester (0.6 mmol, 1.5 equiv), methyl 2-((phenylsulfonyl)methyl)acrylate (192 mg, 0.8 mmol, 2.0 equiv), and 4-CzIPN (6.4 mg, 0.008 mmol, 2 mol%) sequentially. Then the vial was closed with a PTFE septum cap, and taken out of the glovebox. Then, the reaction was irradiated with one 20 W 160-440 nm LED for 12 hours (tube 5 cm away from lights, fans for cooling, 30-35 °C). After that, the reaction mixture was concentrated and run through a short silica gel pad with hexanes/EtOAc (3:1) as the eluent. Then the solvent was removed under the reduced pressure. The product **76** was isolated by flash chromatography with 42% yield.

Data for product **76**:

<sup>1</sup>H NMR (500 MHz, CDCl<sub>3</sub>) δ 6.13 (d, *J* = 1.6 Hz, 1H), 5.47 (d, *J* = 1.1 Hz, 1H), 3.73 (s, 3H), 2.18 (d, *J* = 7.0 Hz, 2H), 1.71 – 1.58 (m, 5H), 1.49 – 1.37 (m, 1H), 1.27 – 1.07 (m, 3H), 0.92 – 0.78 (m, 2H).

<sup>13</sup>C NMR (126 MHz, CDCl<sub>3</sub>) δ 168.0, 139.1, 125.7, 51.7, 39.9, 36.5, 33.0, 26.5, 26.2.

HRMS (APCI) *m/z* [M + H]<sup>+</sup> calcd for C<sub>11</sub>H<sub>19</sub>O<sub>2</sub>: 183.1385, found: 183.1389.

### Quantum Yield Analysis

#### Determination of the light intensity at 440 nm:

Following a literature procedure of Yoon (6), the photon flux of the spectrophotometer was determined by standard ferrioxalate actinometry. A 0.15 M solution of ferrioxalate was prepared by dissolving 2.21 g of potassium ferrioxalate hydrate in 30 mL of 0.05 M H<sub>2</sub>SO<sub>4</sub>. A buffered solution of phenanthroline was prepared by dissolving 50 mg of phenanthroline and 11.25 g of sodium acetate in 50 mL of 0.5 M H<sub>2</sub>SO<sub>4</sub>. Both solutions were stored in the



dark. To determine the photon flux of the spectrophotometer, 2.0 mL of the ferrioxalate solution was placed in a cuvette and irradiated for 90.0 seconds at  $\lambda = 440$  nm with an emission slit width at 10.0 nm. After irradiation, 0.35 mL of the phenanthroline solution was added to the cuvette. The solution was then allowed to rest for 1 h to allow the ferrous ions to completely coordinate to the phenanthroline. The absorbance of the solution was measured at 510 nm. A non-irradiated sample was also prepared and the absorbance at 510 nm measured. Conversion was calculated using eq 1.

$$\text{mol Fe}^{2+} = \frac{V \cdot \Delta A}{l \cdot \epsilon} \quad (1)$$

Where  $V$  is the total volume (0.00235 L) of the solution after addition of phenanthroline,  $\Delta A$  is the difference in absorbance at 510 nm between the irradiated and non-irradiated solutions,  $l$  is the path length (1.000 cm), and  $\epsilon$  is the molar absorptivity at 510 nm (11,100 L mol<sup>-1</sup> cm<sup>-1</sup>). The photon flux can be calculated using eq 2.

$$\text{photon flux} = \frac{\text{mol Fe}^{2+}}{\Phi \cdot t \cdot f} \quad (2)$$

Where  $\Phi$  is the quantum yield for the ferrioxalate actinometer (1.01 for a 0.15 M solution at  $\lambda = 436$  nm),  $t$  is the time (90.0 s), and  $f$  is the fraction of light absorbed at  $\lambda = 436$  nm (0.99833, *vide infra*). The photon flux was calculated to be  $4.5936 \times 10^{-9}$  einstein s<sup>-1</sup>.

Sample calculation:

$$\text{mol Fe}^{2+} = \frac{0.00235 \text{ L} \cdot 1.969}{1.0 \text{ cm} \cdot 11100 \text{ L mol}^{-1} \text{ cm}^{-1}} = 4.1686 \times 10^{-7} \text{ mol}$$

$$\text{photon flux} = \frac{4.1686 \times 10^{-7} \text{ mol}}{1.01 \cdot 90.0 \text{ s} \cdot 0.99833} = 4.5936 \times 10^{-9} \text{ einstein s}^{-1}$$

### Determination of the reaction quantum yield:

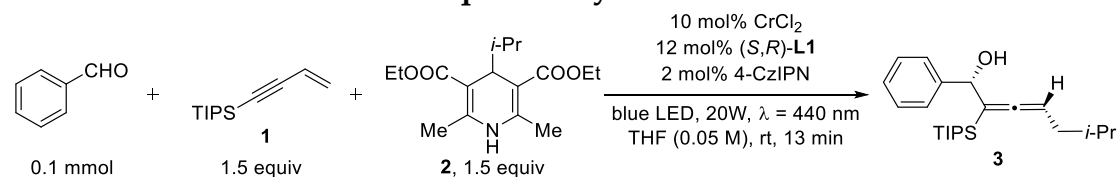

**Preparation of the catalyst solution:** In a nitrogen-filled glovebox, and oven-dried 4 mL vial with a magnetic stir bar, were charged the CrCl<sub>2</sub> (1.3 mg, 0.01 mmol, 10 mol%) and (S,R)-L1 (5.8 mg, 0.012 mmol, 12 mol%). Then 2.0 mL THF was added and the vial was closed with a PTFE septum cap, and then stirred at room temperature for 2 h.

**Catalytic asymmetric radical difunctionalization of 1,3-enynes:** In a nitrogen-filled glovebox, to the prepared catalyst solution were added the 1,3-enyne **1** (0.15 mmol, 1.5 equiv), benzaldehyde (0.1 mmol, 1.0 equiv), the DHP ester **2** (0.15 mmol, 1.5 equiv), and 4-CzIPN (1.6 mg, 0.002 mmol, 2 mol%)

sequentially. Then the vial was closed with a PTFE septum cap, and taken out of the glovebox. The reaction mixture was stirred and irradiated with a single blue LED (20 W,  $\lambda_{\max} = 440$  nm) for 13 min. After irradiation, the yield was determined by GC-FID analysis using dodecane as an internal standard. The yield was determined to be 1.3% ( $1.25 \times 10^{-6}$  mol). The reaction quantum yield ( $\Phi$ ) was determined using eq. 3 where the photon flux is  $4.5936 \times 10^{-9}$  einsteins  $s^{-1}$  (determined by actinometry as described above),  $t$  is the reaction time (780 s) and  $f_R$  is the fraction of incident light absorbed by the reaction mixture. An absorption spectrum of the reaction mixture gave an absorbance value of  $> 3$  at 440 nm, indicating that essentially all the incident light ( $f_R > 0.999$ ) is absorbed by the photocatalyst.

$$\Phi = \frac{n(\text{product})}{\text{photon flux} \cdot t \cdot f} \quad (3)$$

The reaction quantum yield ( $\Phi$ ) was thus determined to be  $\Phi = 0.35$ .

### Light on-off experiments

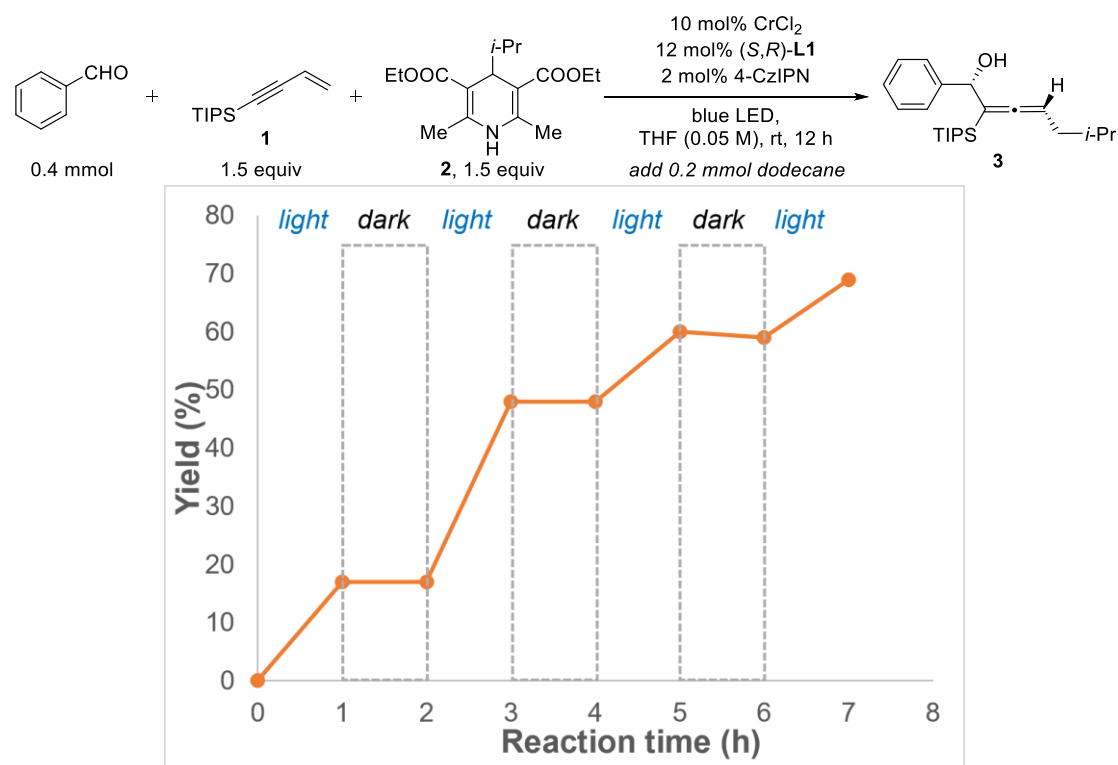

Supplementary Figure 2. Light on-off experiments

**Preparation of the catalyst solution:** In a nitrogen-filled glovebox, and oven-dried 20 mL vial with a magnetic stir bar, were charged the  $\text{CrCl}_2$  (5.0 mg, 0.04 mmol, 10 mol%) and  $(S,R)\text{-L1}$  (23.2 mg, 0.048 mmol, 12 mol%). Then 8.0 mL THF was added and the vial was closed with a PTFE septum cap, and then stirred at room temperature for 2 h.

**Catalytic asymmetric radical difunctionalization of 1,3-enynes:** In a nitrogen-filled glovebox, to the prepared catalyst solution were added the 1,3-enyne **1** (0.6 mmol, 1.5 equiv), benzaldehyde (0.4 mmol, 1.0 equiv), the DHP ester **2** (0.6 mmol, 1.5 equiv), dodecane (0.2 mmol), and 4-CzIPN (6.4 mg, 0.008 mmol, 2 mol%) sequentially. Then the vial was closed with a PTFE septum cap, and taken out of the glovebox. Then, the reaction was irradiated with one 20 W 160-440 nm LED for 1 hour (tube 5 cm away from lights, fans for cooling, 30-35 °C). After that, light was turned off, sample (200  $\mu$ L) was taken with a syringe and analyzed by GC to determine the yields. And the reaction was stirred in the dark for 1 hour. And sample (200  $\mu$ L) was taken with a syringe and analyzed by GC to determine the yields. Above light on-off experiments were conducted for another three times.

### Stern-Volmer fluorescence quenching experiments

A Hitachi F-7000 fluorescence spectrometer was used to record the emission intensities. All 4-CzIPN solutions were excited at 440 nm and the emission intensity at 531 nm was observed. THF was degassed with a stream of N<sub>2</sub> for 30 min. In a typical experiment, the emission spectrum of a  $2 \times 10^{-5}$  M solution of 4-CzIPN in THF was collected. Then, appropriate amount of quencher was added to the measured solution in a quartz cuvette and the emission spectrum of the sample was collected.  $I_0$  and  $I$  represent the intensities of the emission in the absence and presence of the quencher at 531 nm.

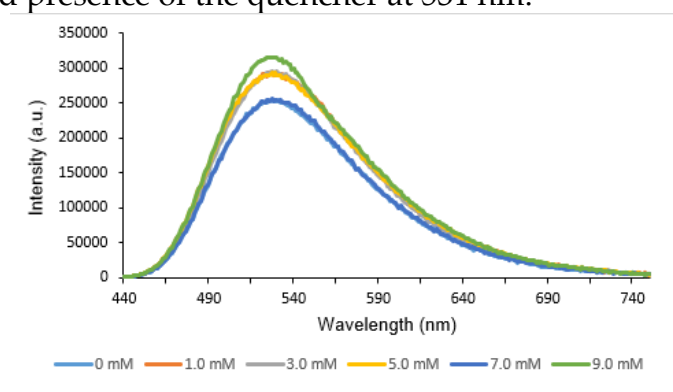

**Supplementary Figure 3.** Emission spectra of  $2 \times 10^{-5}$  M 4-CzIPN at  $\lambda_{\text{ex}} = 440$  nm showing the quenching effect of increasing of enyne **1**.

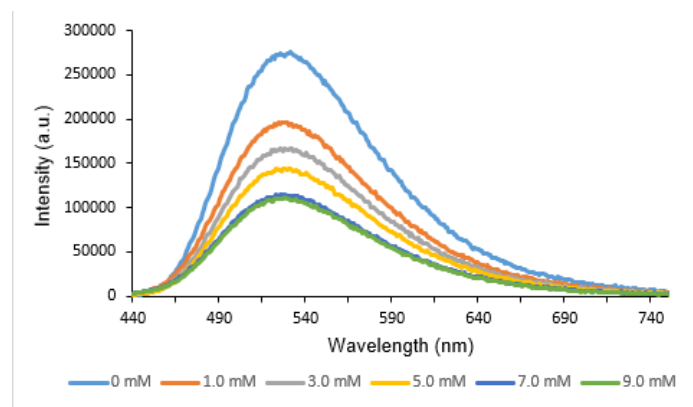

**Supplementary Figure 4.** Emission spectra of  $2 \times 10^{-5}$  M 4-CzIPN at  $\lambda_{ex} = 440$  nm showing the quenching effect of increasing of DHP ester 2.

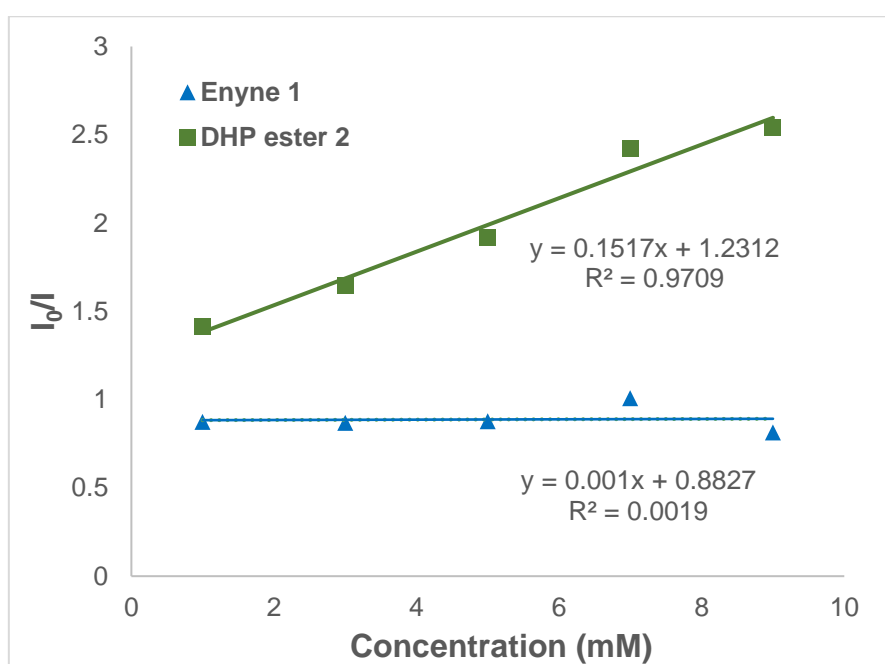

**Supplementary Figure 5.** The Stern-Volmer plot.

## 1.7 Assignment of the Absolute Configuration

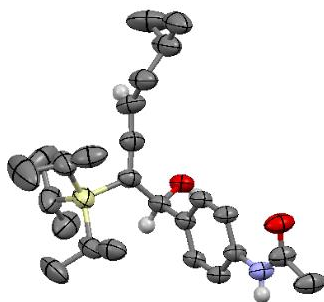

**Supplementary Figure 6.** Thermal ellipsoid plot at the 50% probability level. Hydrogen atoms are omitted for clarity. Metrical parameters for the structure of **12** are available free of charge from the Cambridge Crystallographic Data Centre (<https://www.ccdc.cam.ac.uk/>) under reference number CCDC 2130059.

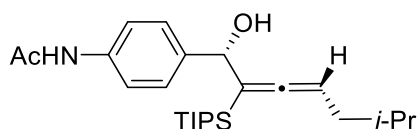

***N*-(4-((1*S*,3*S*)-1-hydroxy-6-methyl-2-(triisopropylsilyl)hepta-2,3-dien-1-yl)phenyl)acetamide (Figure 3, entry 12).** X-ray quality crystals were obtained by slow evaporation of a saturated solution in CH<sub>2</sub>Cl<sub>2</sub>/hexanes of a sample synthesized with (*S,R*)-L1. A single crystal of C<sub>25</sub>H<sub>41</sub>NO<sub>2</sub>Si was selected and mounted in a nylon loop in parabar oil. All measurements were performed on a Bruker Photon III diffractometer with filtered Cu-K $\alpha$  radiation at a temperature of 100 K. Using Olex2 (7), the structure was solved with the ShelXS structure solution program (8) using Direct Methods and refined with the ShelXL refinement package (9) using Least Squares minimization. The absolute stereochemistry was determined on the basis of the absolute structure parameter. Crystal data, data collection parameters, and structure refinement details are given in Supplementary Table 2.

**Supplementary Table 2.** Crystal data and structure refinement for **12**.

|                      |                                                                                             |          |
|----------------------|---------------------------------------------------------------------------------------------|----------|
| Identification code  | cu-full-no7_a                                                                               |          |
| Empirical formula    | C <sub>6.25</sub> H <sub>10.25</sub> N <sub>0.25</sub> O <sub>0.50</sub> Si <sub>0.25</sub> |          |
| Formula weight       | 103.92                                                                                      |          |
| Temperature          | 100(2) K                                                                                    |          |
| Wavelength           | 1.54178 Å                                                                                   |          |
| Crystal system       | Orthorhombic                                                                                |          |
| Space group          | P2 <sub>1</sub> 2 <sub>1</sub> 2 <sub>1</sub>                                               |          |
| Unit cell dimensions | a = 8.5909(3) Å                                                                             | a = 90°. |
|                      | b = 11.9281(5) Å                                                                            | b = 90°. |
|                      | c = 26.4715(13) Å                                                                           | g = 90°. |

|                                   |                                             |
|-----------------------------------|---------------------------------------------|
| Volume                            | 2712.6(2) Å <sup>3</sup>                    |
| Z                                 | 16                                          |
| Density (calculated)              | 1.018 Mg/m <sup>3</sup>                     |
| Absorption coefficient            | 0.888 mm <sup>-1</sup>                      |
| F(000)                            | 912                                         |
| Crystal size                      | 0.54 x 0.08 x 0.065 mm <sup>3</sup>         |
| Theta range for data collection   | 3.339 to 66.797°.                           |
| Index ranges                      | -10<=h<=9, -14<=k<=14, -30<=l<=31           |
| Reflections collected             | 28257                                       |
| Independent reflections           | 4809 [R(int) = 0.1119]                      |
| Completeness to theta = 66.797°   | 99.9 %                                      |
| Absorption correction             | Semi-empirical from equivalents             |
| Max. and min. transmission        | 0.7528 and 0.5118                           |
| Refinement method                 | Full-matrix least-squares on F <sup>2</sup> |
| Data / restraints / parameters    | 4809 / 2 / 278                              |
| Goodness-of-fit on F <sup>2</sup> | 1.048                                       |
| Final R indices [I>2sigma(I)]     | R1 = 0.0647, wR2 = 0.1717                   |
| R indices (all data)              | R1 = 0.0984, wR2 = 0.1981                   |
| Absolute structure parameter      | -0.01(3)                                    |
| Extinction coefficient            | 0.0038(9)                                   |
| Largest diff. peak and hole       | 0.336 and -0.196 e.Å <sup>-3</sup>          |

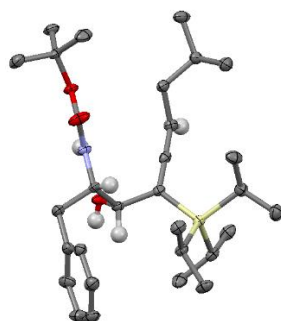

**Supplementary Figure 7.** Thermal ellipsoid plot at the 50% probability level. Hydrogen atoms are omitted for clarity. Metrical parameters for the structure of **42** are available free of charge from the Cambridge Crystallographic Data Centre (<https://www.ccdc.cam.ac.uk/>) under reference number CCDC 2130062.

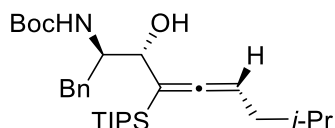

**tert-butyl ((2R,3S,5S)-3-hydroxy-8-methyl-1-phenyl-4-(triisopropylsilyl)nona-4,5-dien-2-yl)carbamate (Figure 3, entry 42).** X-ray quality crystals were obtained by slow evaporation of a saturated solution in CH<sub>2</sub>Cl<sub>2</sub>/hexanes of a sample synthesized with (*S,R*)-L1. A single crystal of

C<sub>30</sub>H<sub>51</sub>NO<sub>3</sub>Si was selected and mounted in a nylon loop in parabar oil. All measurements were performed on a Bruker Photon III diffractometer with filtered Mo-K $\alpha$  radiation at a temperature of 100 K. Using Olex2 (5), the structure was solved with the ShelXS structure solution program (6) using Direct Methods and refined with the ShelXL refinement package (7) using Least Squares minimization. The absolute stereochemistry was determined on the basis of the absolute structure parameter. Crystal data, data collection parameters, and structure refinement details are given in Supplementary Table 3.

**Supplementary Table 3.** Crystal data and structure refinement for **42**.

|                                   |                                                     |          |
|-----------------------------------|-----------------------------------------------------|----------|
| Identification code               | mo_ZFH_0930_3962_0m_a                               |          |
| Empirical formula                 | C <sub>30</sub> H <sub>51</sub> N O <sub>3</sub> Si |          |
| Formula weight                    | 501.80                                              |          |
| Temperature                       | 100(2) K                                            |          |
| Wavelength                        | 0.71073 Å                                           |          |
| Crystal system                    | Orthorhombic                                        |          |
| Space group                       | P2 <sub>1</sub> 2 <sub>1</sub> 2 <sub>1</sub>       |          |
| Unit cell dimensions              | a = 10.7957(7) Å                                    | a = 90°. |
|                                   | b = 11.6038(6) Å                                    | b = 90°. |
|                                   | c = 24.5221(15) Å                                   | g = 90°. |
| Volume                            | 3071.9(3) Å <sup>3</sup>                            |          |
| Z                                 | 4                                                   |          |
| Density (calculated)              | 1.085 Mg/m <sup>3</sup>                             |          |
| Absorption coefficient            | 0.105 mm <sup>-1</sup>                              |          |
| F(000)                            | 1104                                                |          |
| Crystal size                      | 0.1 × 0.04 × 0.03 mm <sup>3</sup>                   |          |
| Theta range for data collection   | 1.942 to 28.278°.                                   |          |
| Index ranges                      | -14 ≤ h ≤ 14, -15 ≤ k ≤ 12, -28 ≤ l ≤ 32            |          |
| Reflections collected             | 58595                                               |          |
| Independent reflections           | 7613 [R(int) = 0.0764]                              |          |
| Completeness to theta = 25.242°   | 99.7 %                                              |          |
| Absorption correction             | Semi-empirical from equivalents                     |          |
| Max. and min. transmission        | 0.7457 and 0.6649                                   |          |
| Refinement method                 | Full-matrix least-squares on F <sup>2</sup>         |          |
| Data / restraints / parameters    | 7613 / 2 / 333                                      |          |
| Goodness-of-fit on F <sup>2</sup> | 0.998                                               |          |
| Final R indices [I > 2σ(I)]       | R1 = 0.0356, wR2 = 0.0814                           |          |
| R indices (all data)              | R1 = 0.0439, wR2 = 0.0869                           |          |
| Absolute structure parameter      | -0.02(5)                                            |          |
| Extinction coefficient            | n/a                                                 |          |
| Largest diff. peak and hole       | 0.227 and -0.222 e.Å <sup>-3</sup>                  |          |

## 1.8 NMR Spectra

$^1\text{H}$  NMR (500 MHz, room temperature,  $\text{CDCl}_3$ )

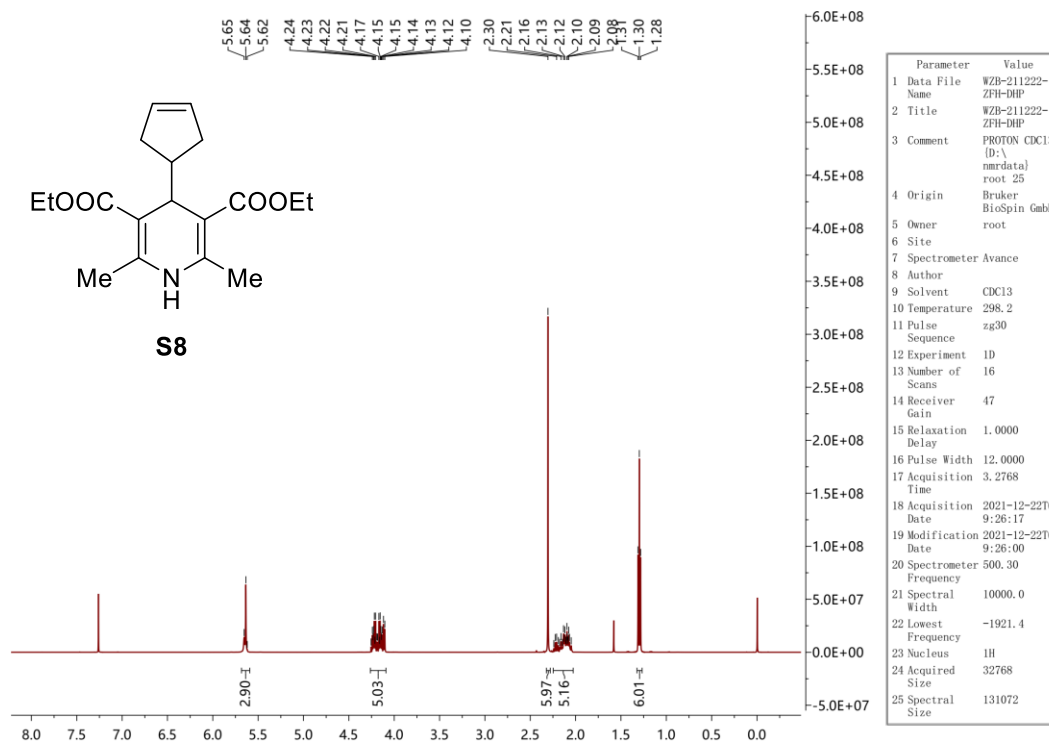

Supplementary Figure 8.  $^1\text{H}$  NMR spectrum of compound S8

$^{13}\text{C}$  NMR (126 MHz, room temperature,  $\text{CDCl}_3$ )

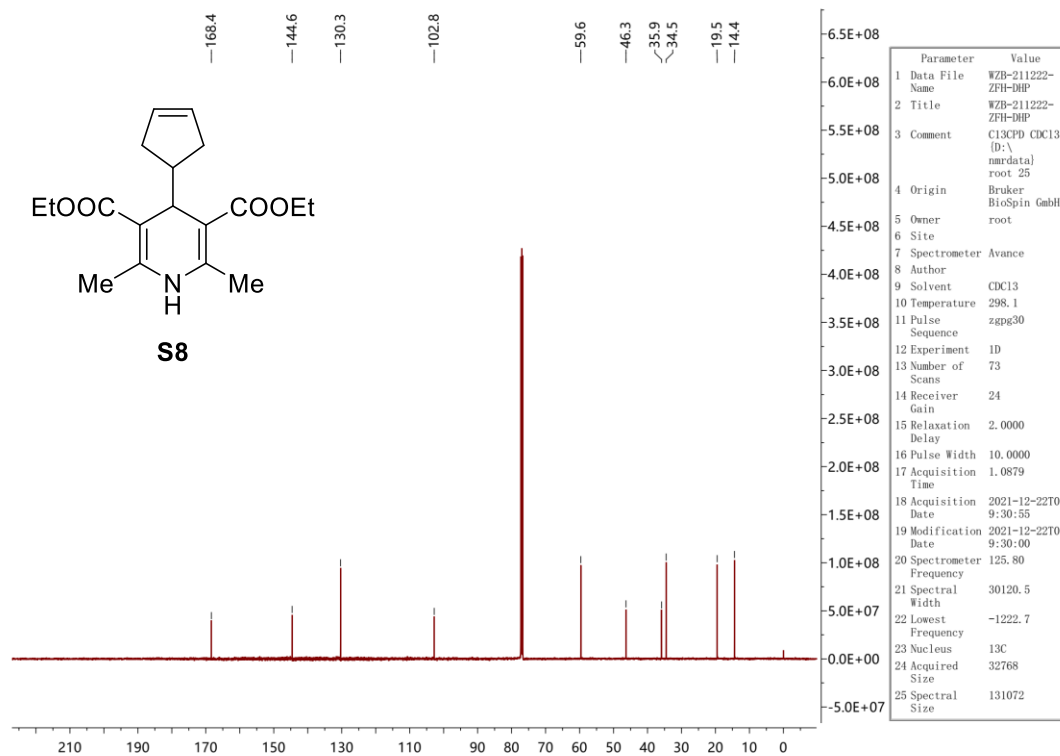

Supplementary Figure 9.  $^{13}\text{C}$  NMR spectrum of compound S8



$^1\text{H}$  NMR (500 MHz, room temperature,  $\text{CDCl}_3$ )

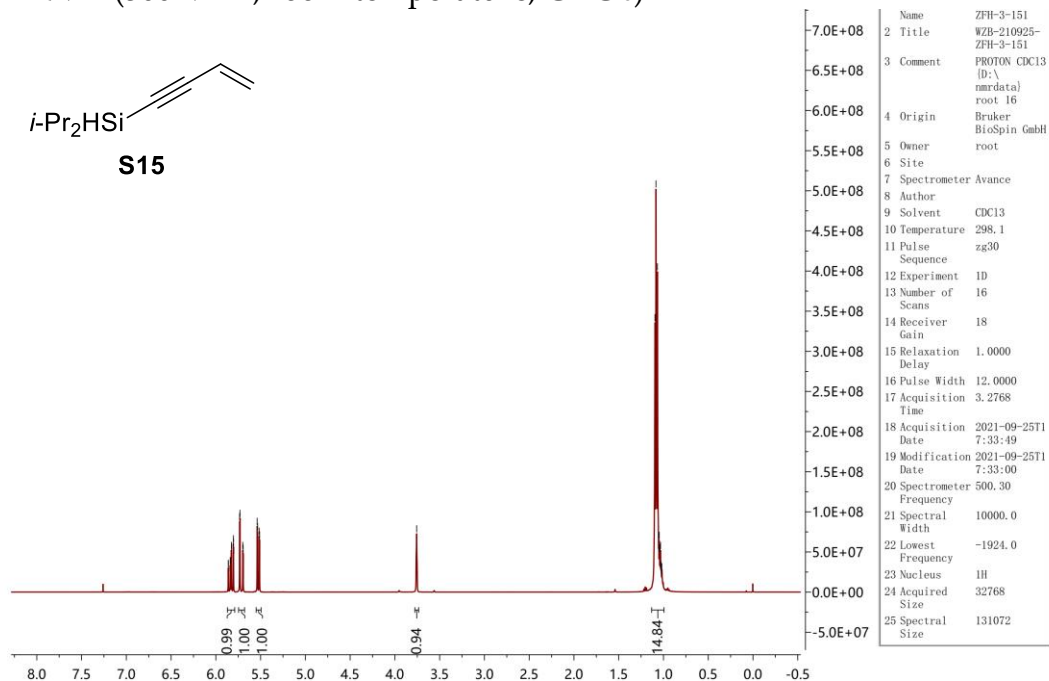

**Supplementary Figure 10.**  $^1\text{H}$  NMR spectrum of compound **S15**

$^{13}\text{C}$  NMR (126 MHz, room temperature,  $\text{CDCl}_3$ )

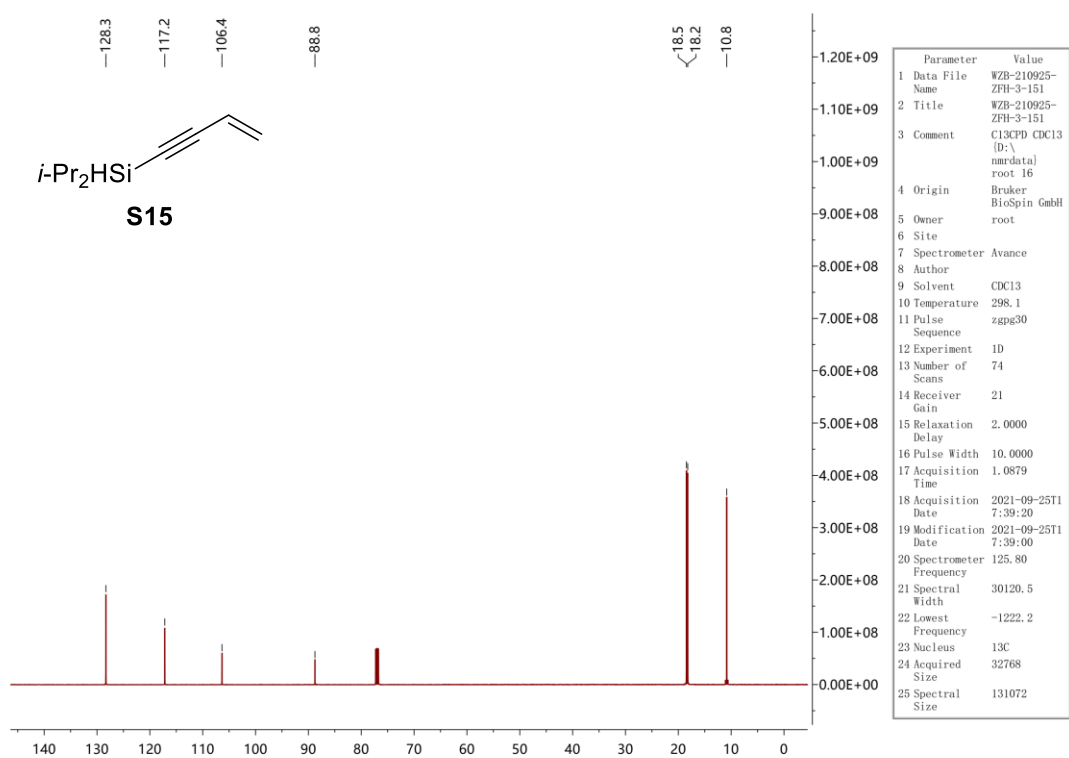

**Supplementary Figure 11.**  $^{13}\text{C}$  NMR spectrum of compound **S15**

<sup>1</sup>H NMR (500 MHz, room temperature, CDCl<sub>3</sub>)

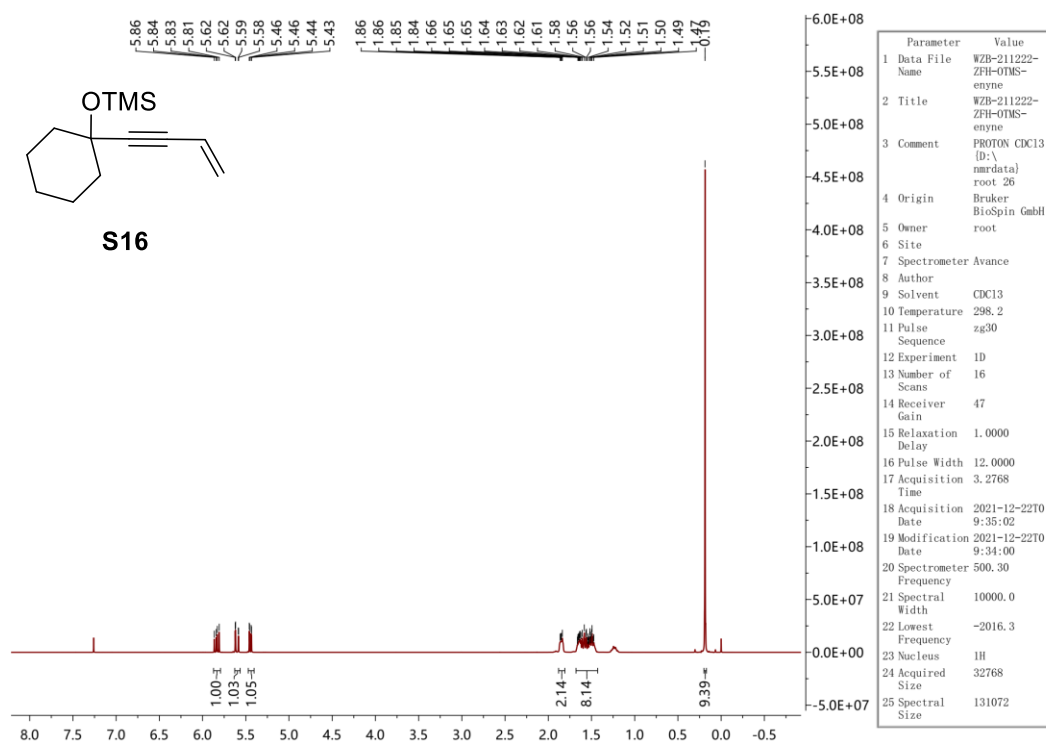

**Supplementary Figure 12.** <sup>1</sup>H NMR spectrum of compound **S16**

<sup>13</sup>C NMR (126 MHz, room temperature, CDCl<sub>3</sub>)

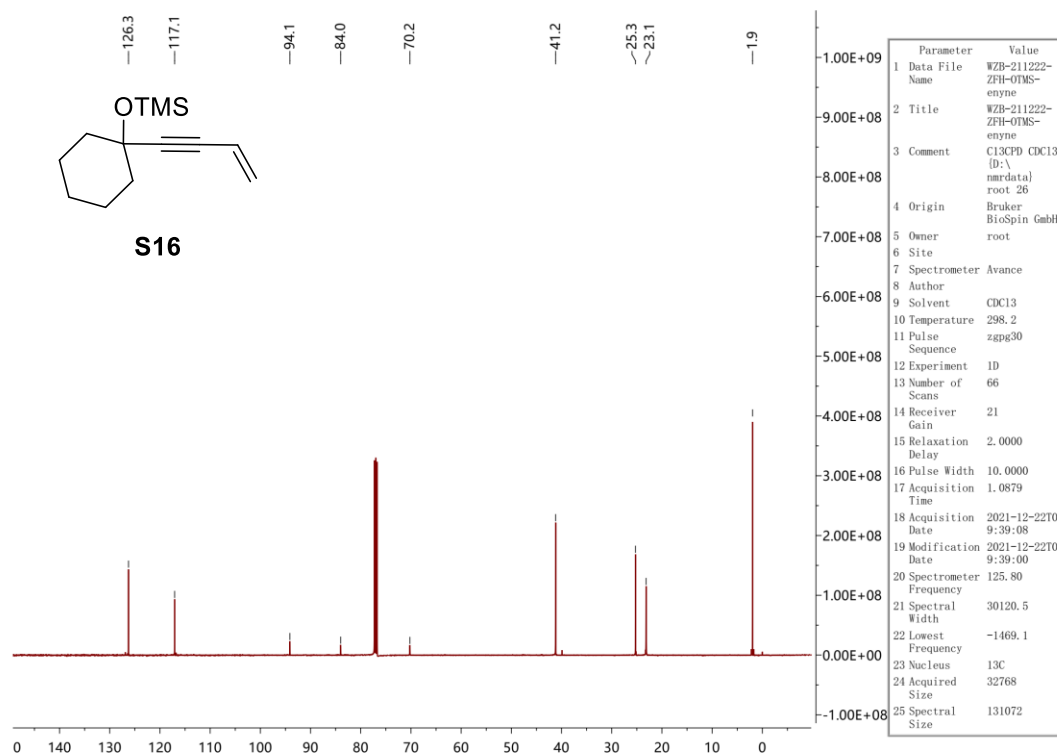

**Supplementary Figure 13.** <sup>13</sup>C NMR spectrum of compound **S16**

<sup>1</sup>H NMR (500 MHz, room temperature, CDCl<sub>3</sub>)

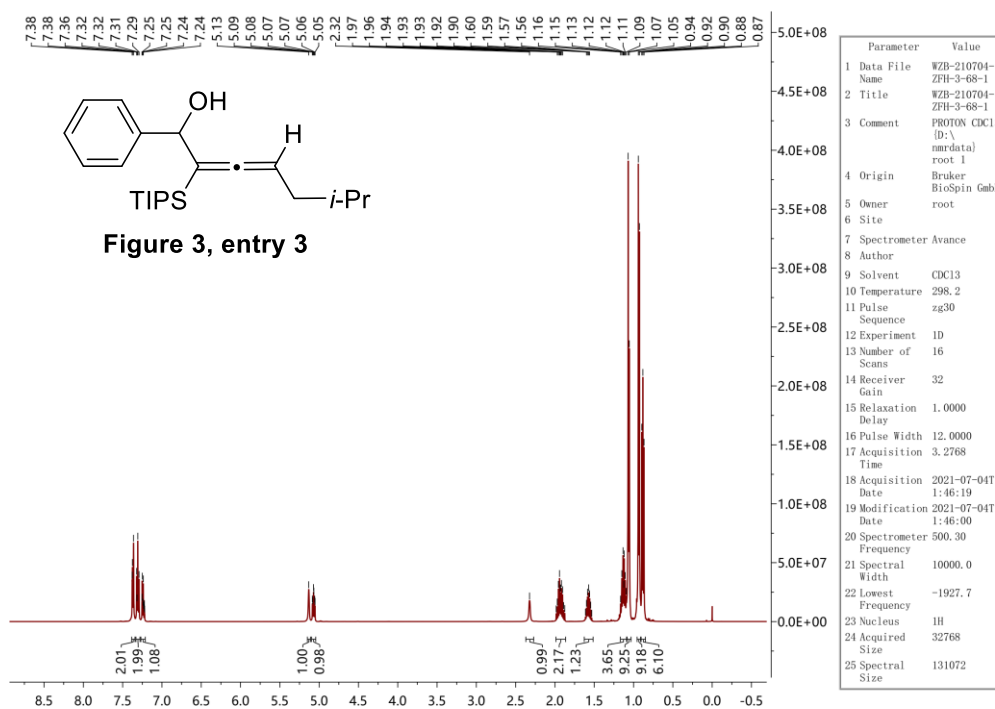

**Supplementary Figure 14.** <sup>1</sup>H NMR spectrum of compound 3

<sup>13</sup>C NMR (126 MHz, room temperature, CDCl<sub>3</sub>)

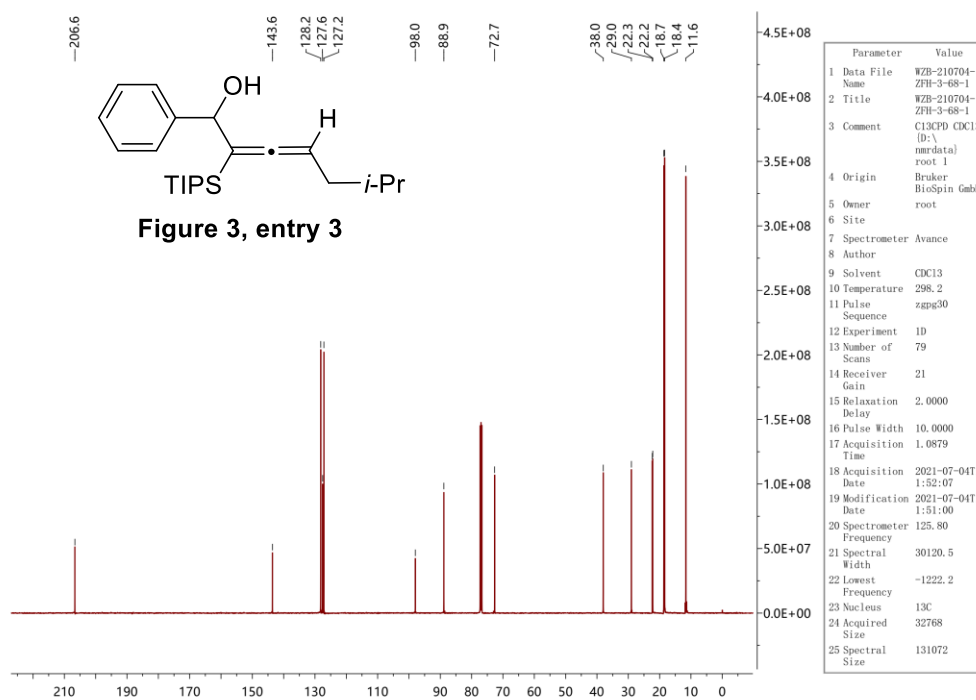

**Supplementary Figure 15.** <sup>13</sup>C NMR spectrum of compound 3

<sup>1</sup>H NMR (500 MHz, room temperature, CDCl<sub>3</sub>)

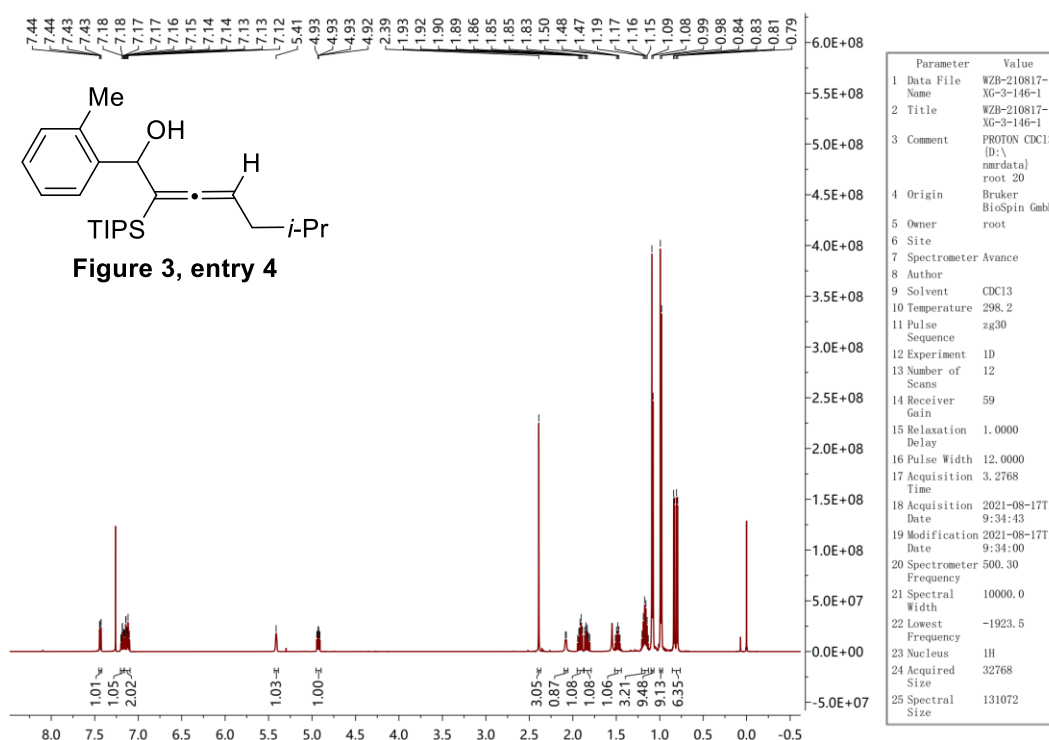

**Supplementary Figure 16.** <sup>1</sup>H NMR spectrum of compound 4

<sup>13</sup>C NMR (126 MHz, room temperature, CDCl<sub>3</sub>)

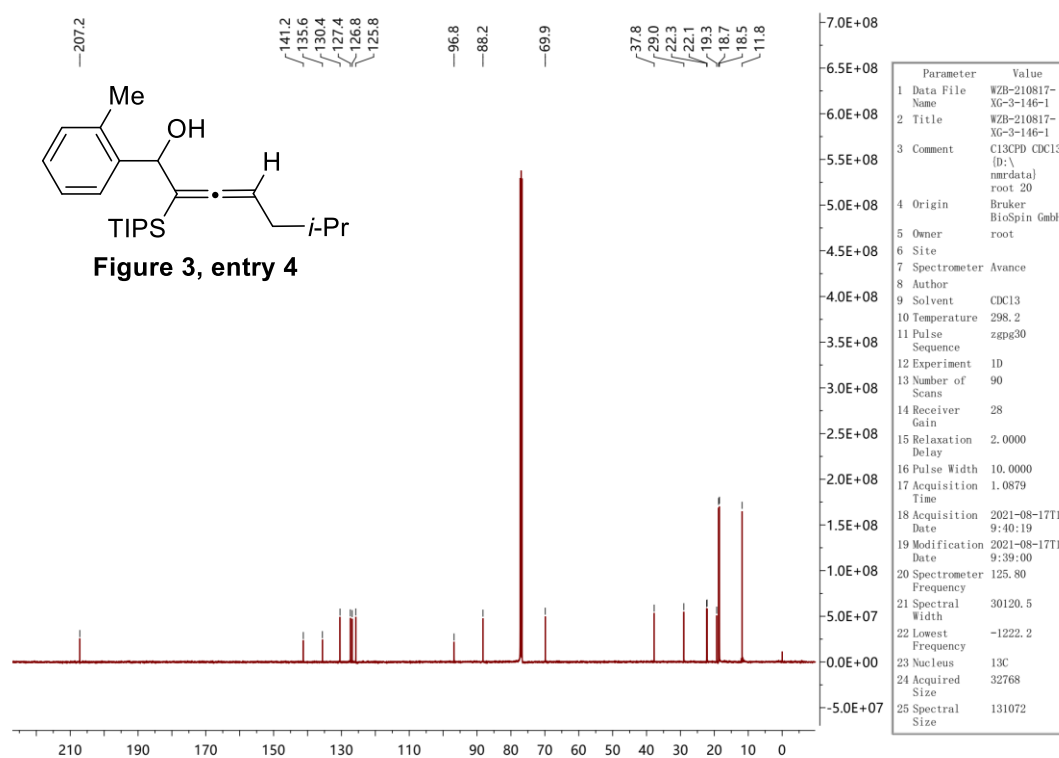

**Supplementary Figure 17.** <sup>13</sup>C NMR spectrum of compound 4

<sup>1</sup>H NMR (500 MHz, room temperature, CDCl<sub>3</sub>)

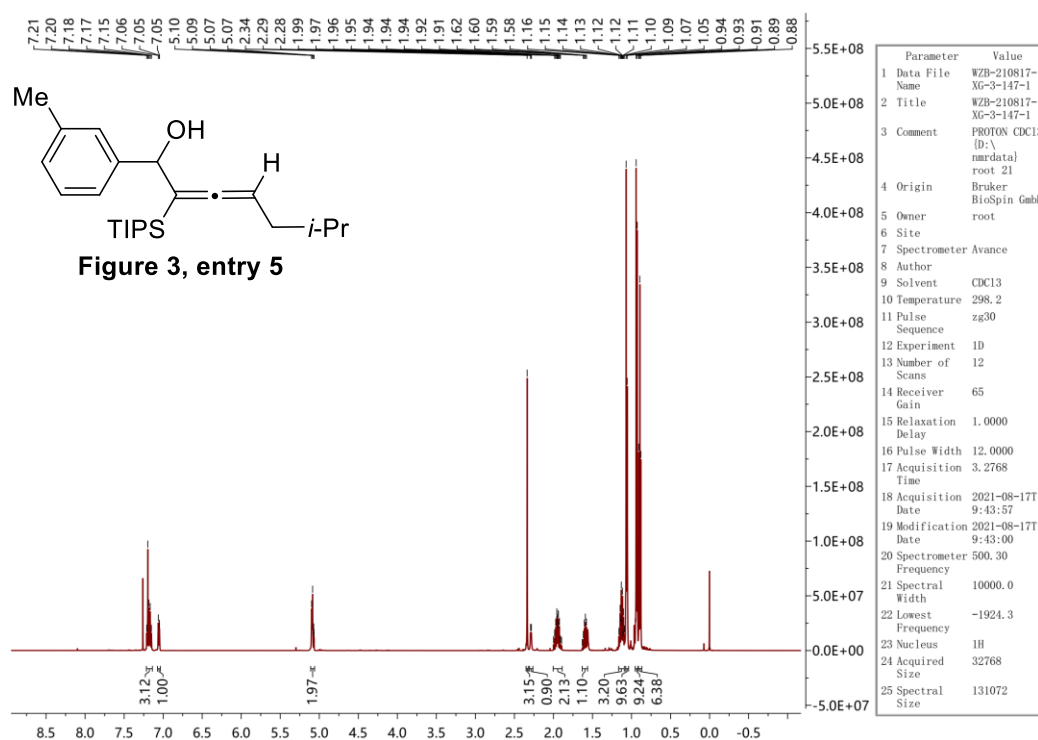

Supplementary Figure 18. <sup>1</sup>H NMR spectrum of compound 5

<sup>13</sup>C NMR (126 MHz, room temperature, CDCl<sub>3</sub>)

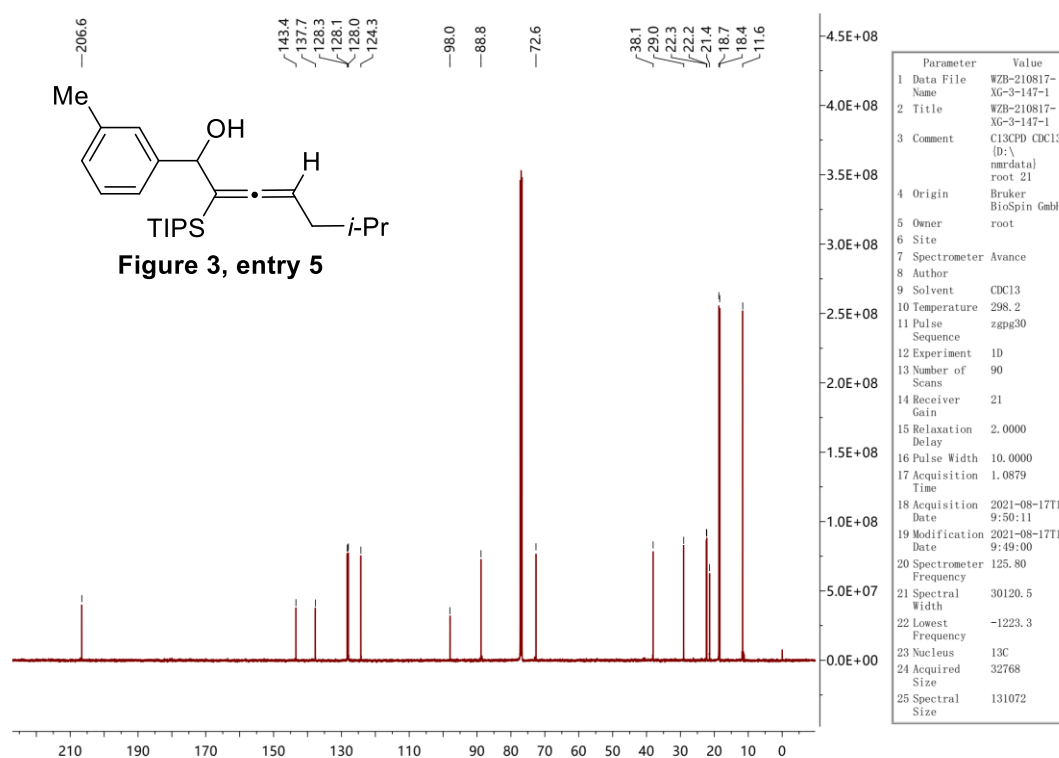

Supplementary Figure 19. <sup>13</sup>C NMR spectrum of compound 5

<sup>1</sup>H NMR (500 MHz, room temperature, CDCl<sub>3</sub>)

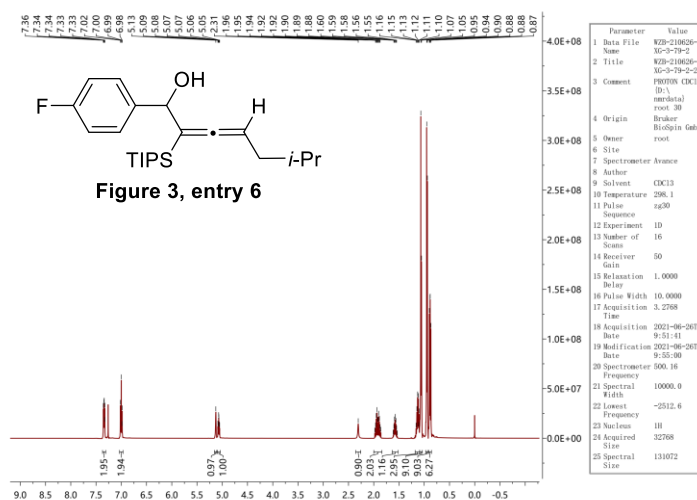

**Supplementary Figure 20.** <sup>1</sup>H NMR spectrum of compound 6  
<sup>13</sup>C NMR (126 MHz, room temperature, CDCl<sub>3</sub>)

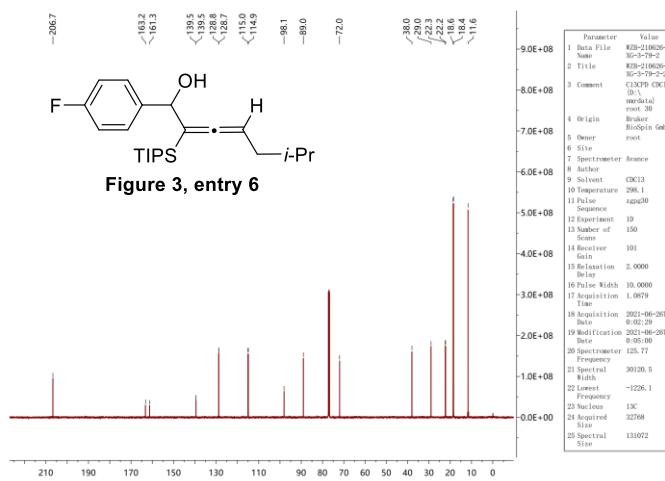

**Supplementary Figure 21.** <sup>13</sup>C NMR spectrum of compound 6  
<sup>19</sup>F NMR (471 MHz, room temperature, CDCl<sub>3</sub>)

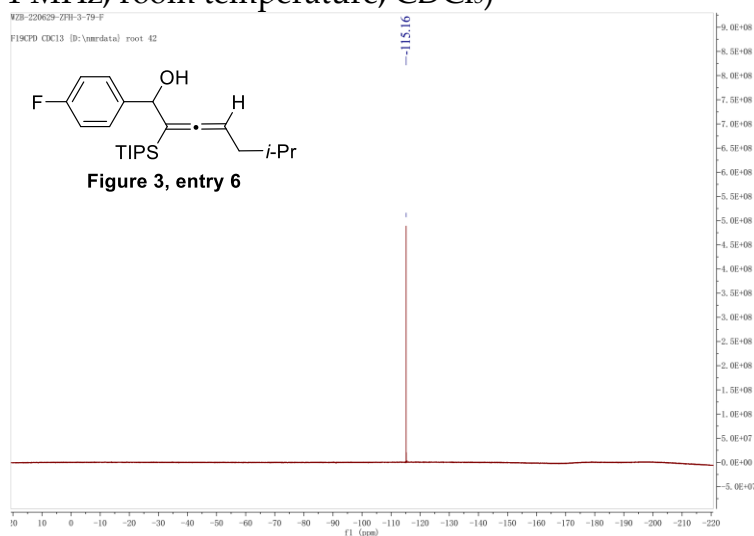

**Supplementary Figure 22.** <sup>19</sup>F NMR spectrum of compound 6

<sup>1</sup>H NMR (500 MHz, room temperature, CDCl<sub>3</sub>)

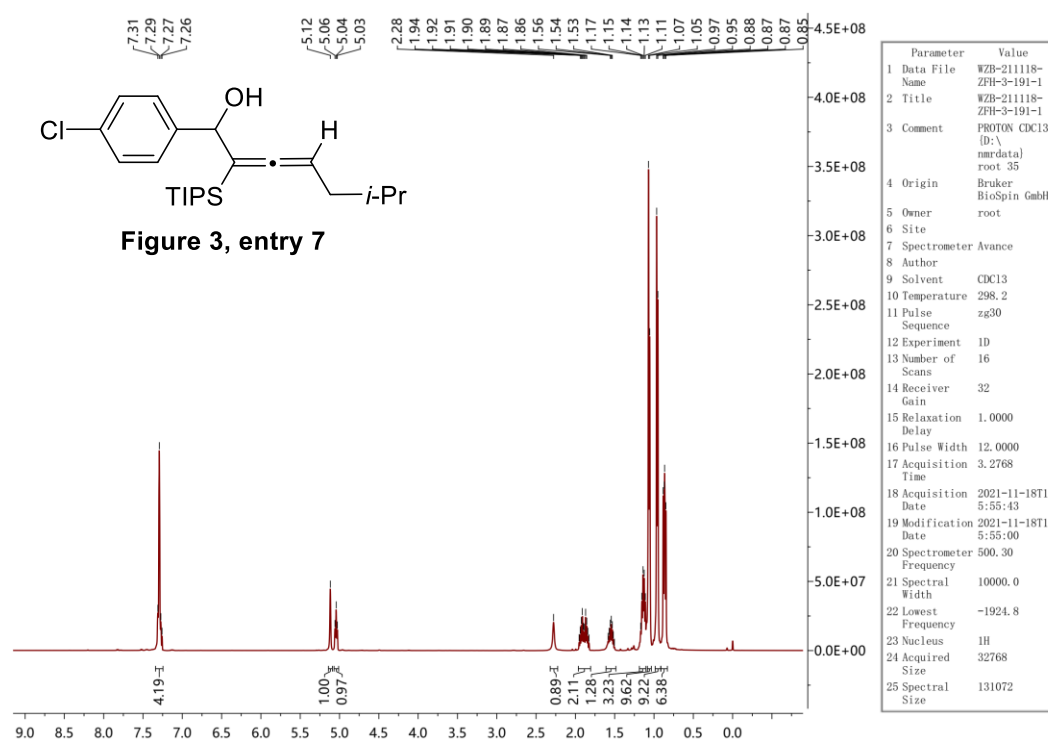

**Supplementary Figure 23.** <sup>1</sup>H NMR spectrum of compound 7

<sup>13</sup>C NMR (126 MHz, room temperature, CDCl<sub>3</sub>)

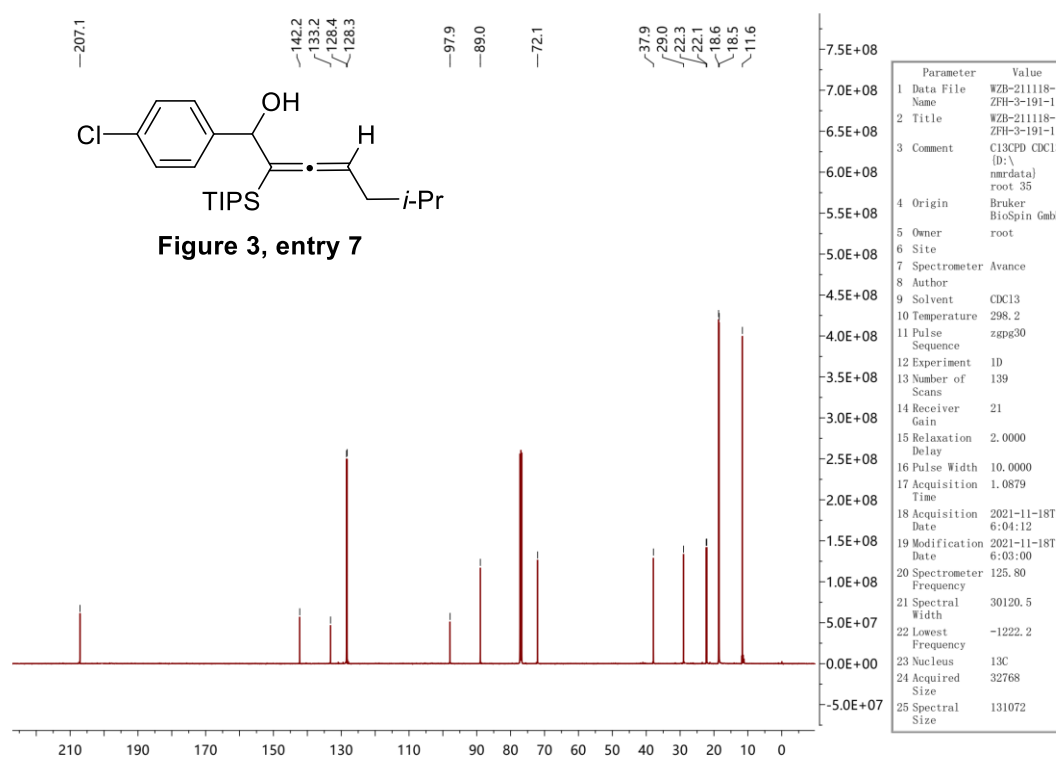

**Supplementary Figure 24.** <sup>13</sup>C NMR spectrum of compound 7

<sup>1</sup>H NMR (500 MHz, room temperature, CDCl<sub>3</sub>)

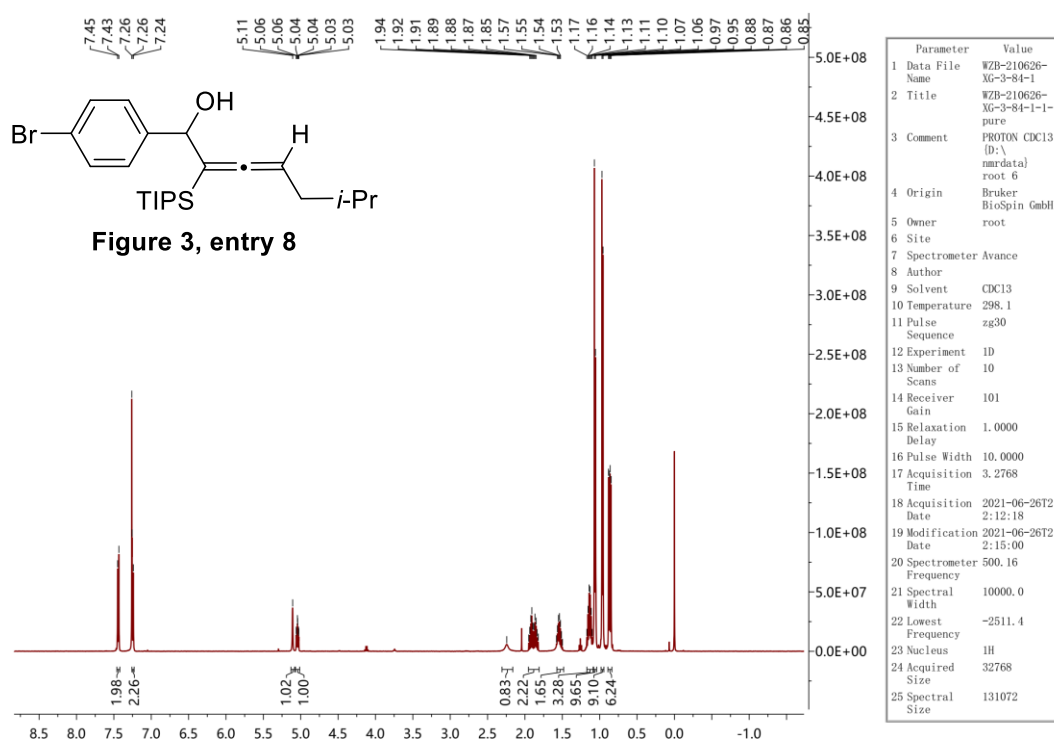

**Supplementary Figure 25.** <sup>1</sup>H NMR spectrum of compound 8

<sup>13</sup>C NMR (126 MHz, room temperature, CDCl<sub>3</sub>)

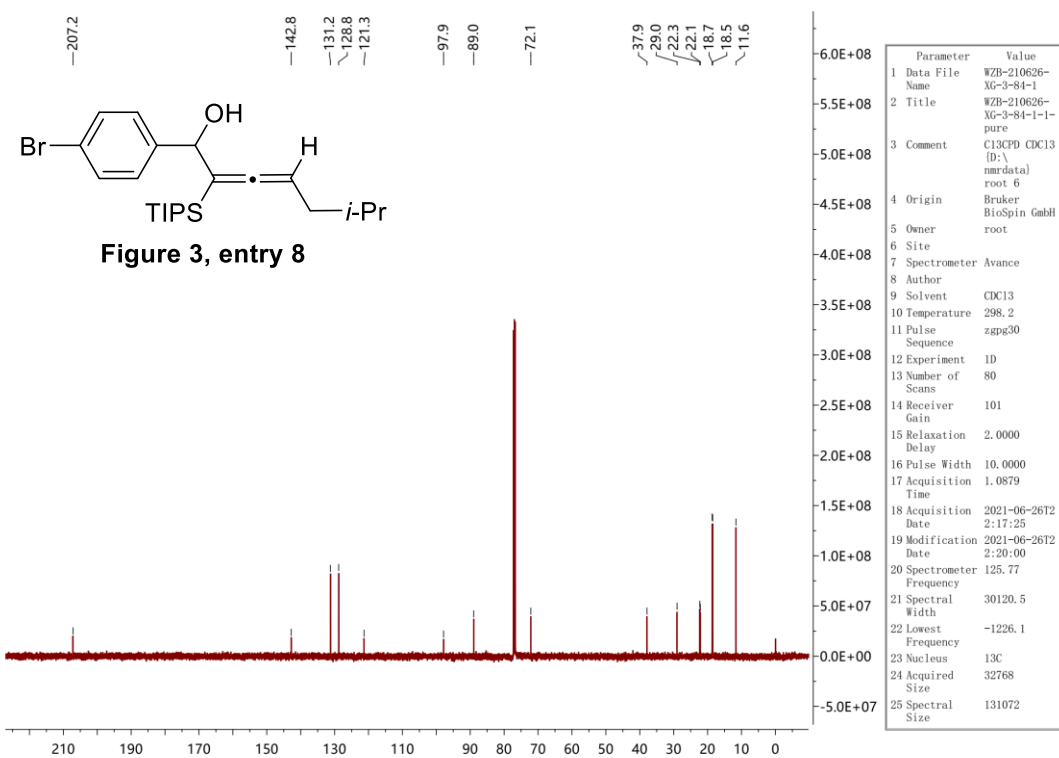

**Supplementary Figure 26.** <sup>13</sup>C NMR spectrum of compound 8



$^1\text{H}$  NMR (500 MHz, room temperature,  $\text{CDCl}_3$ )

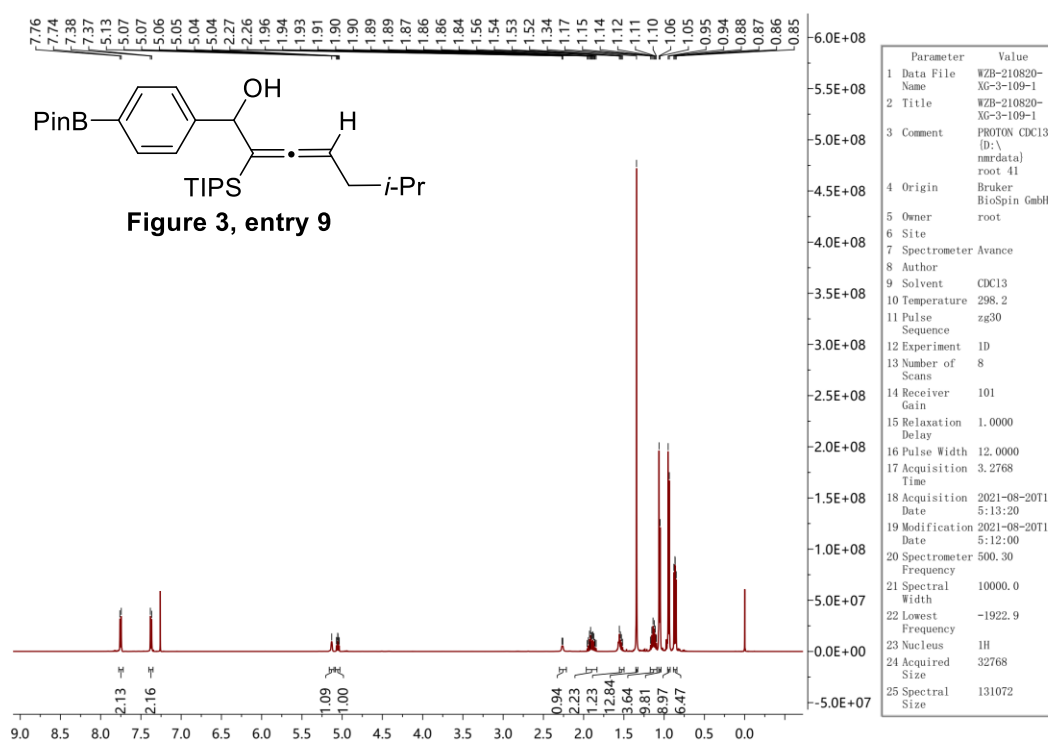

**Supplementary Figure 27.**  $^1\text{H}$  NMR spectrum of compound 9

$^{13}\text{C}$  NMR (126 MHz, room temperature,  $\text{CDCl}_3$ )

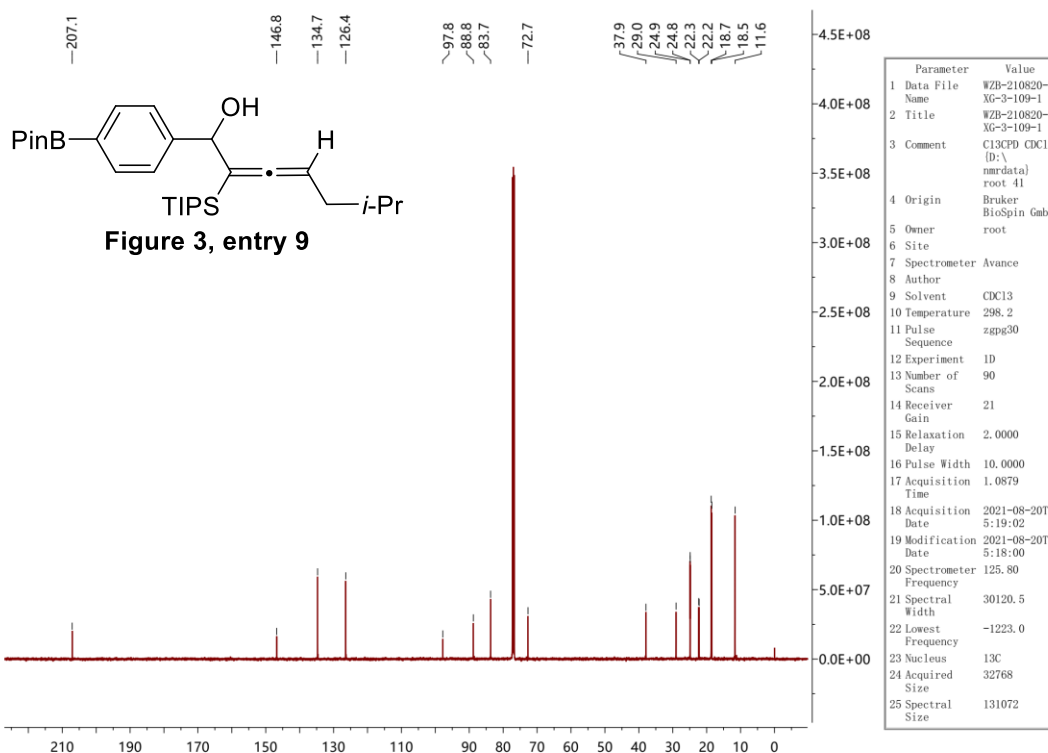

**Supplementary Figure 28.**  $^{13}\text{C}$  NMR spectrum of compound 9

<sup>1</sup>H NMR (500 MHz, room temperature, CDCl<sub>3</sub>)

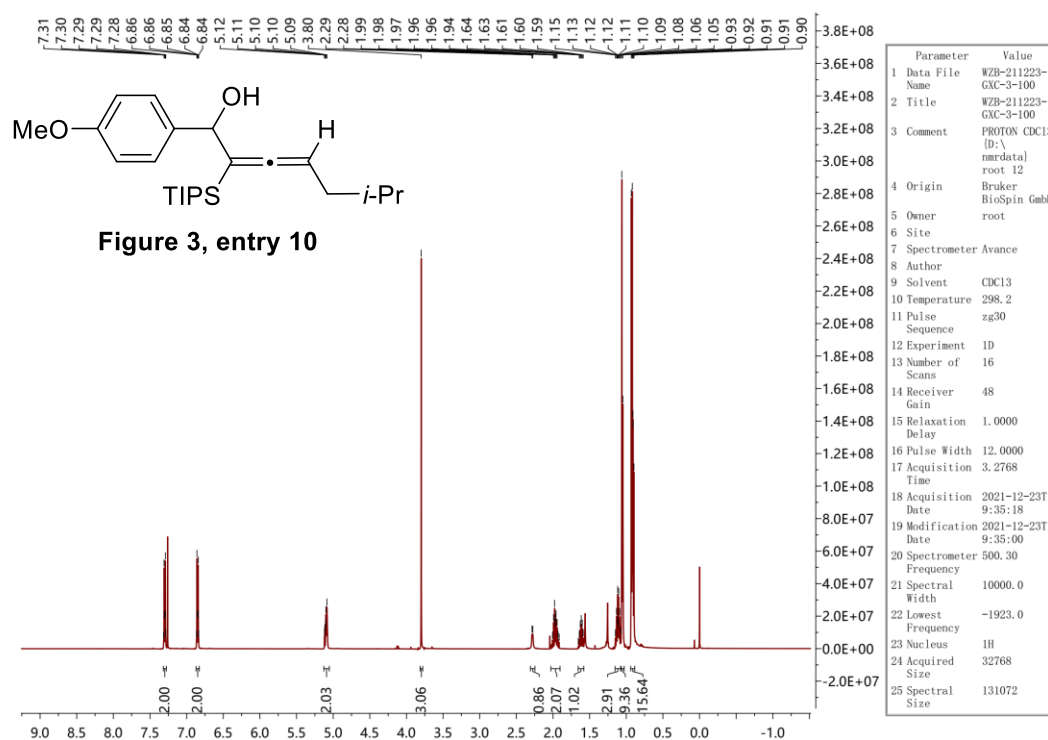

**Supplementary Figure 29.** <sup>1</sup>H NMR spectrum of compound 10

<sup>13</sup>C NMR (126 MHz, room temperature, CDCl<sub>3</sub>)

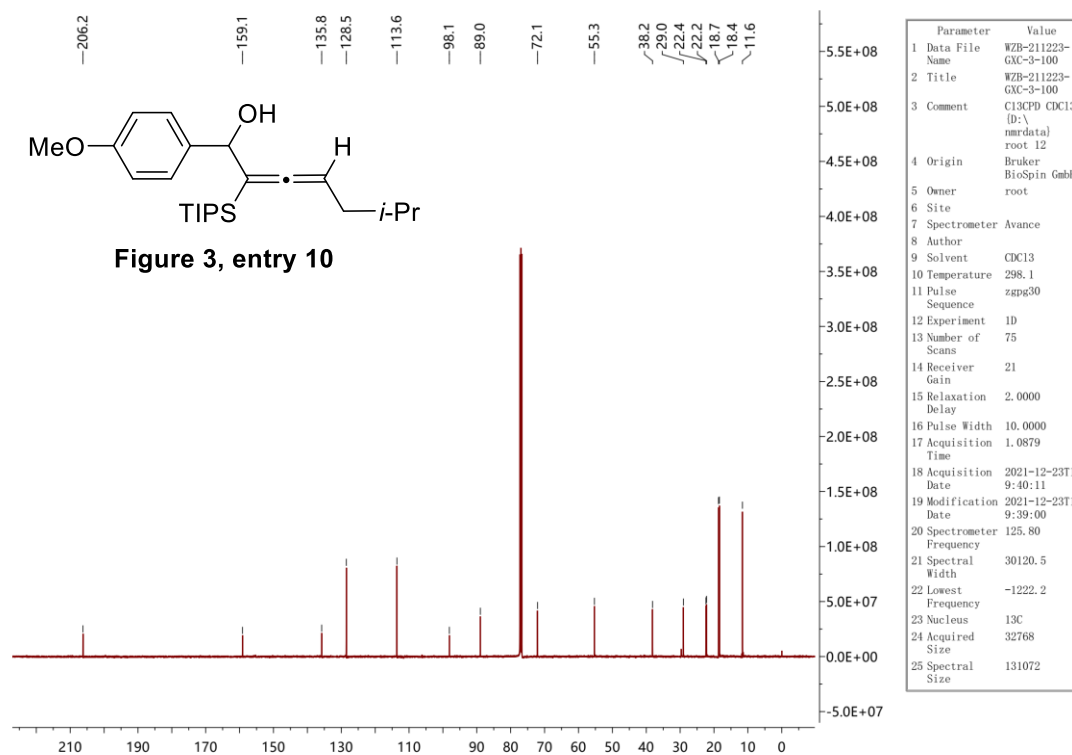

**Supplementary Figure 30.** <sup>13</sup>C NMR spectrum of compound 10

$^1\text{H}$  NMR (500 MHz, room temperature,  $\text{CDCl}_3$ )

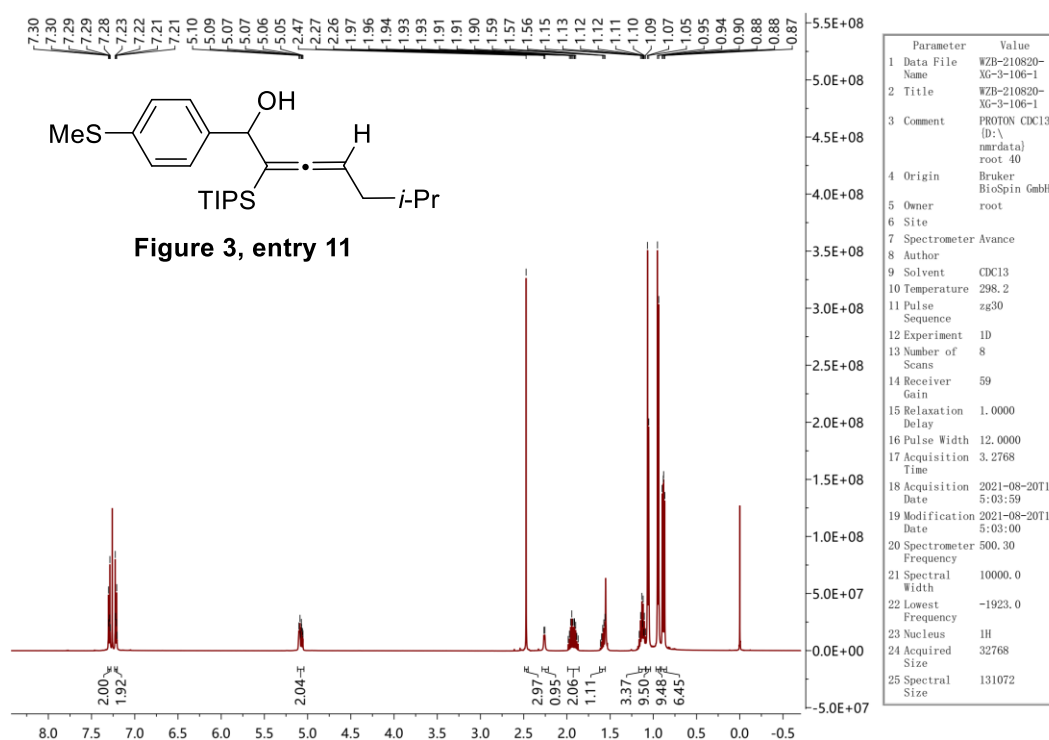

**Supplementary Figure 31.**  $^1\text{H}$  NMR spectrum of compound 11

$^{13}\text{C}$  NMR (126 MHz, room temperature,  $\text{CDCl}_3$ )

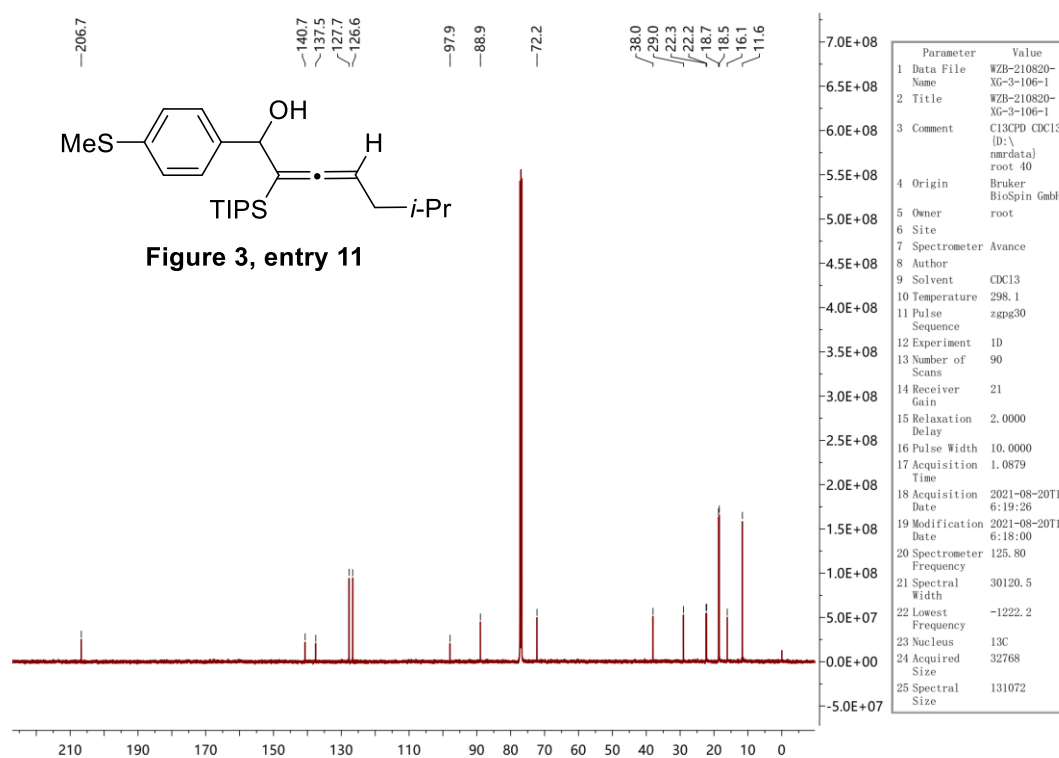

**Supplementary Figure 32.**  $^{13}\text{C}$  NMR spectrum of compound 11

$^1\text{H}$  NMR (500 MHz, room temperature,  $\text{CDCl}_3$ )

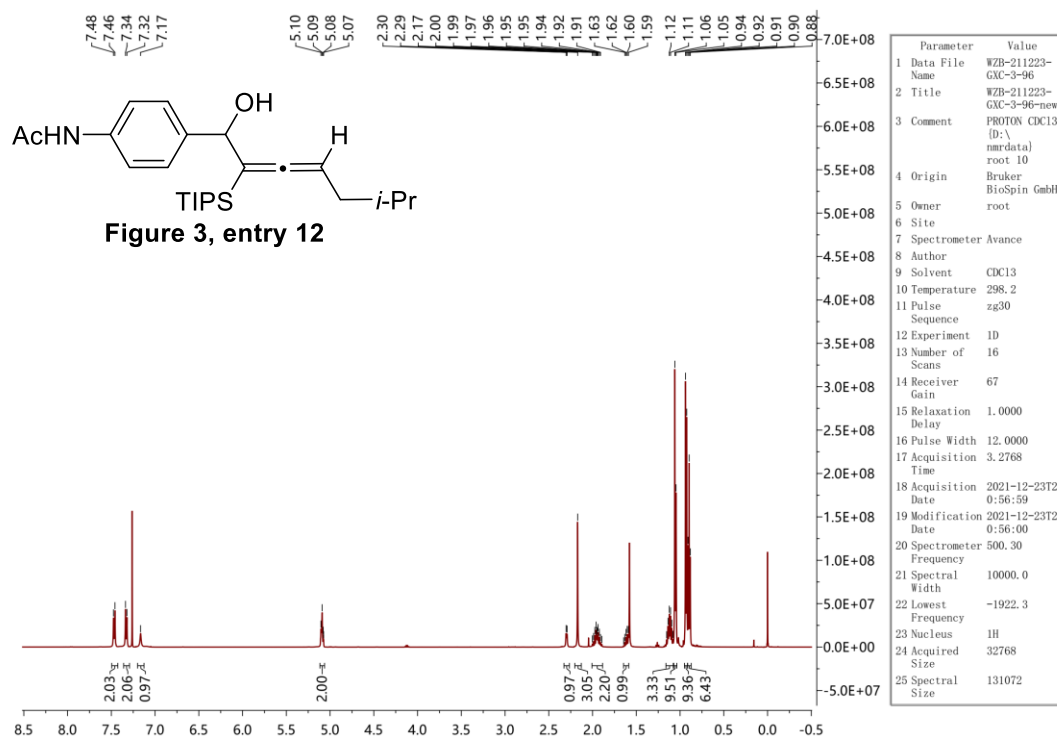

**Supplementary Figure 33.**  $^1\text{H}$  NMR spectrum of compound 12

$^{13}\text{C}$  NMR (126 MHz, room temperature,  $\text{CDCl}_3$ )

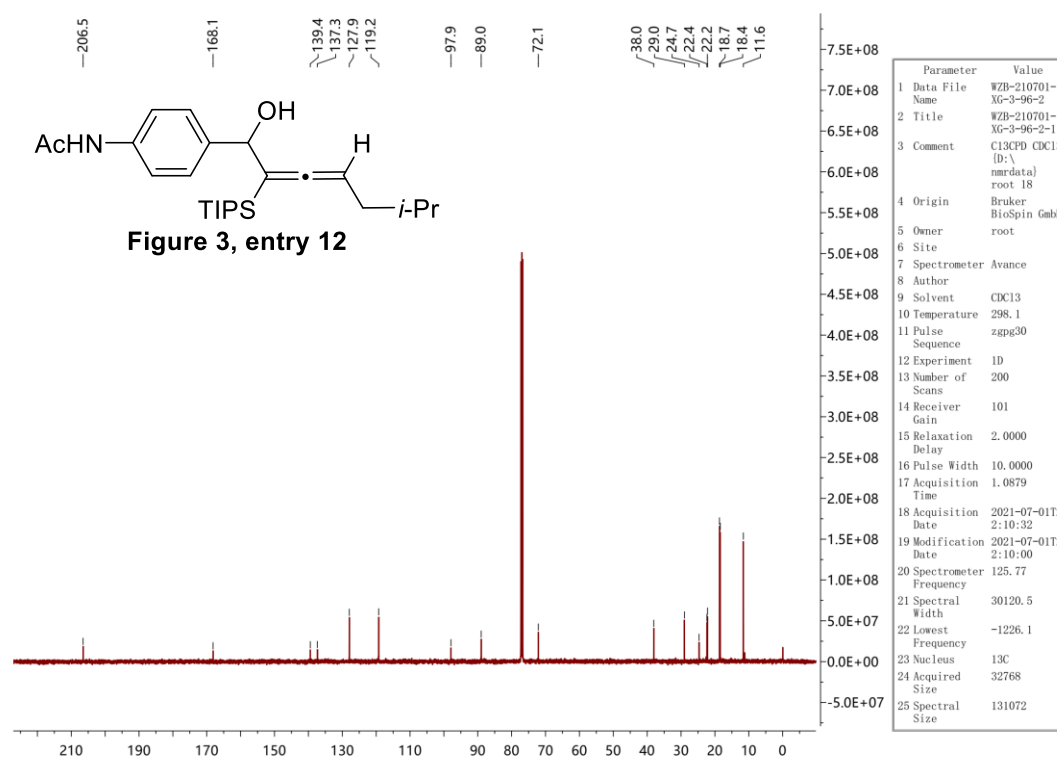

**Supplementary Figure 34.**  $^{13}\text{C}$  NMR spectrum of compound 12

<sup>1</sup>H NMR (500 MHz, room temperature, CDCl<sub>3</sub>)

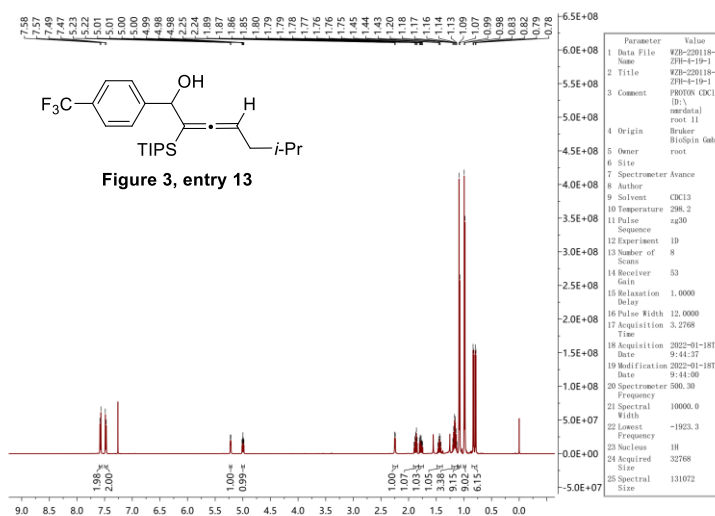

Supplementary Figure 35. <sup>1</sup>H NMR spectrum of compound 13

<sup>13</sup>C NMR (126 MHz, room temperature, CDCl<sub>3</sub>)

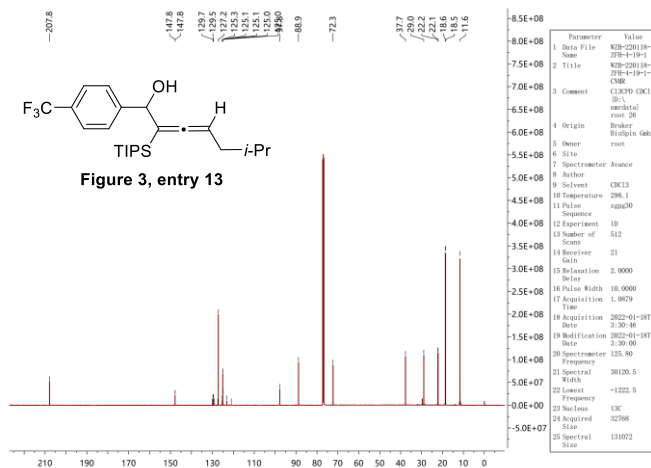

Supplementary Figure 36. <sup>13</sup>C NMR spectrum of compound 13

<sup>19</sup>F NMR (471 MHz, room temperature, CDCl<sub>3</sub>)

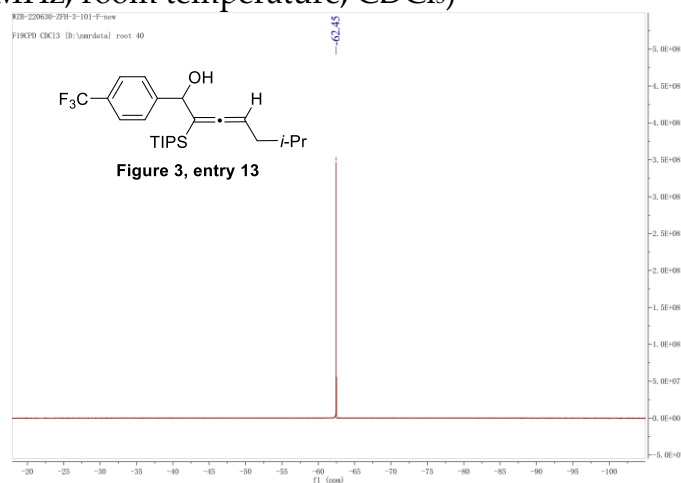

Supplementary Figure 37. <sup>19</sup>F NMR spectrum of compound 13

<sup>1</sup>H NMR (500 MHz, room temperature, CDCl<sub>3</sub>)

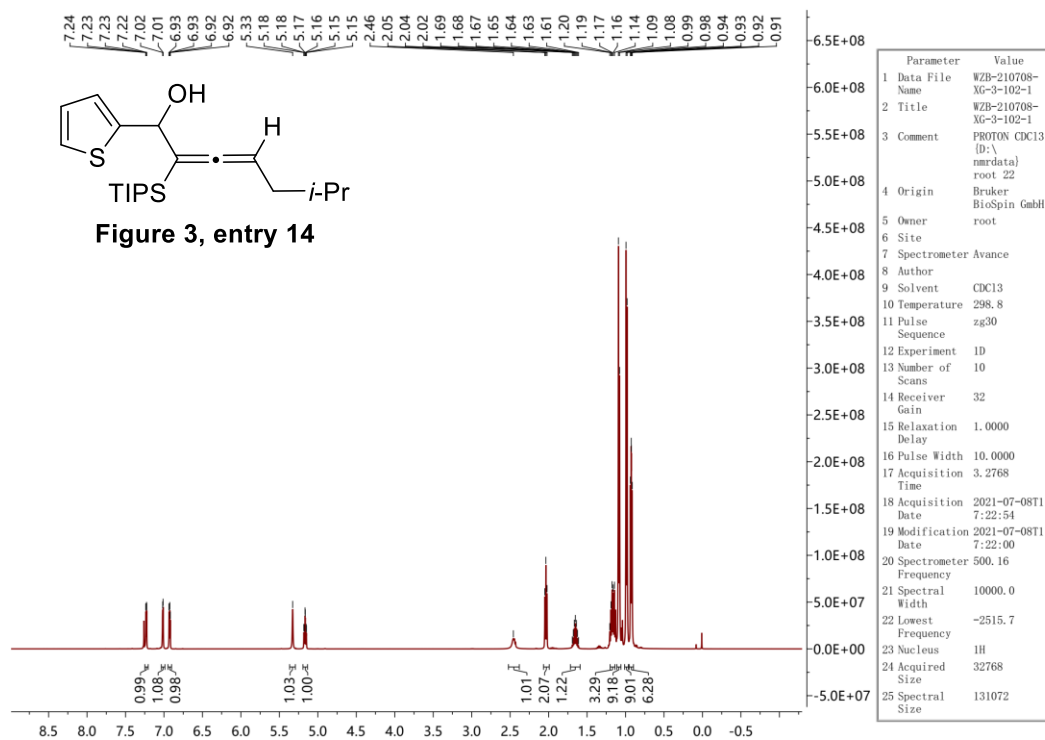

**Supplementary Figure 38.** <sup>1</sup>H NMR spectrum of compound 14

<sup>13</sup>C NMR (126 MHz, room temperature, CDCl<sub>3</sub>)

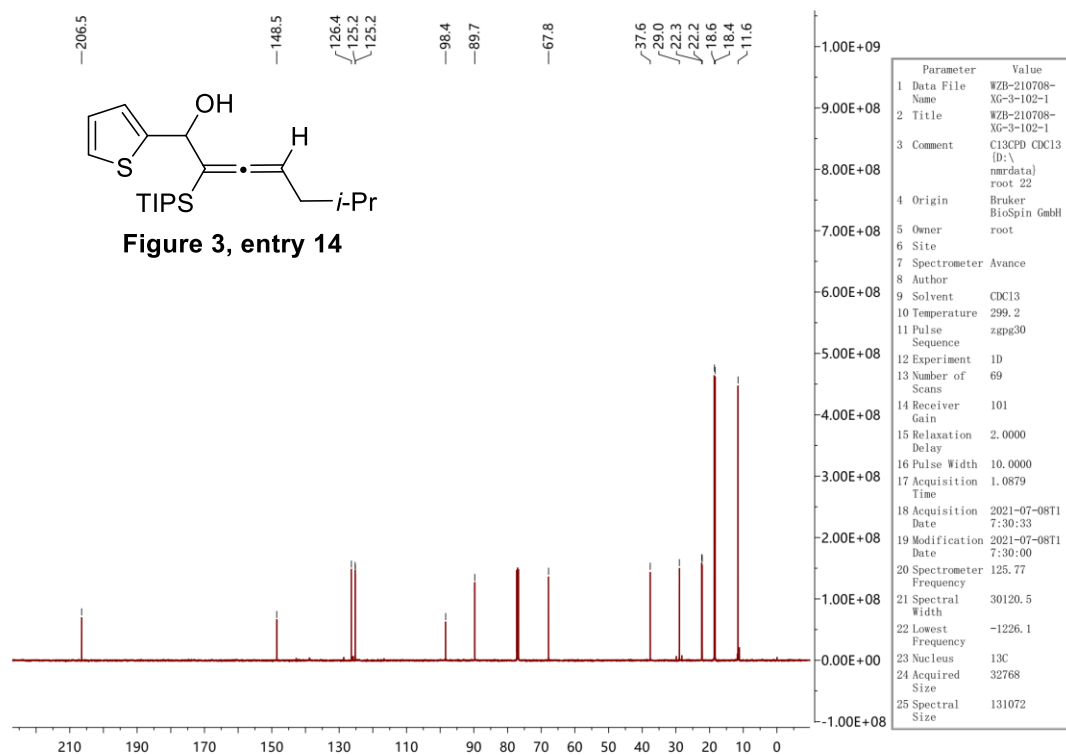

**Supplementary Figure 39.** <sup>13</sup>C NMR spectrum of compound 14

<sup>1</sup>H NMR (500 MHz, room temperature, CDCl<sub>3</sub>)

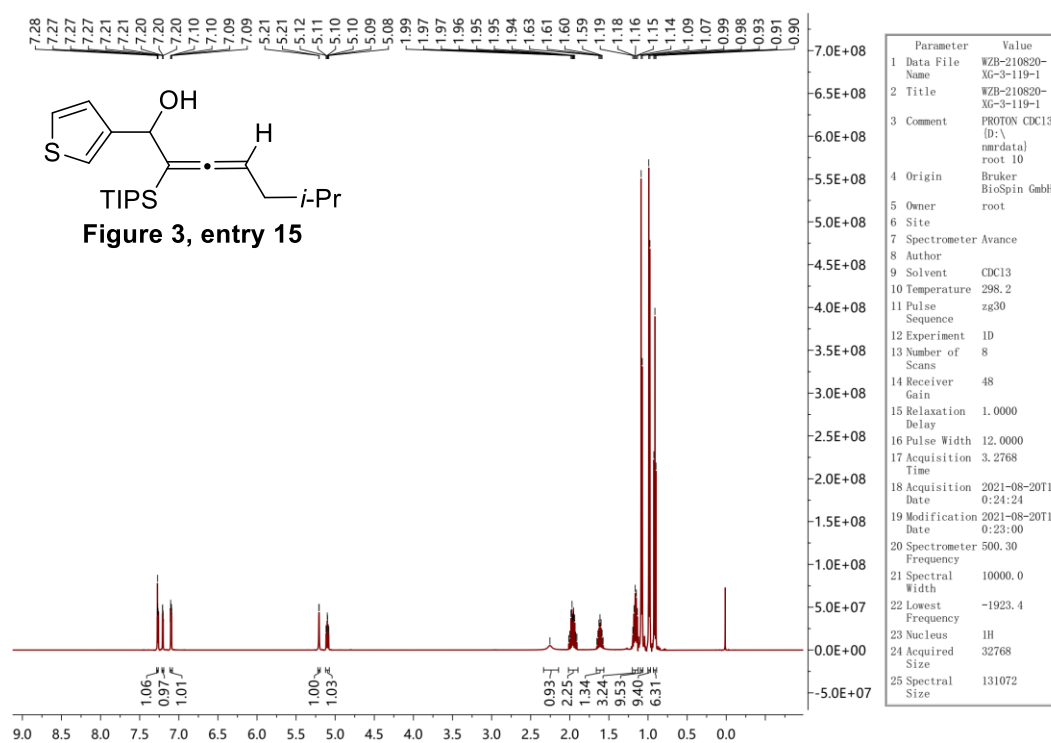

**Supplementary Figure 40.** <sup>1</sup>H NMR spectrum of compound 15

<sup>13</sup>C NMR (126 MHz, room temperature, CDCl<sub>3</sub>)

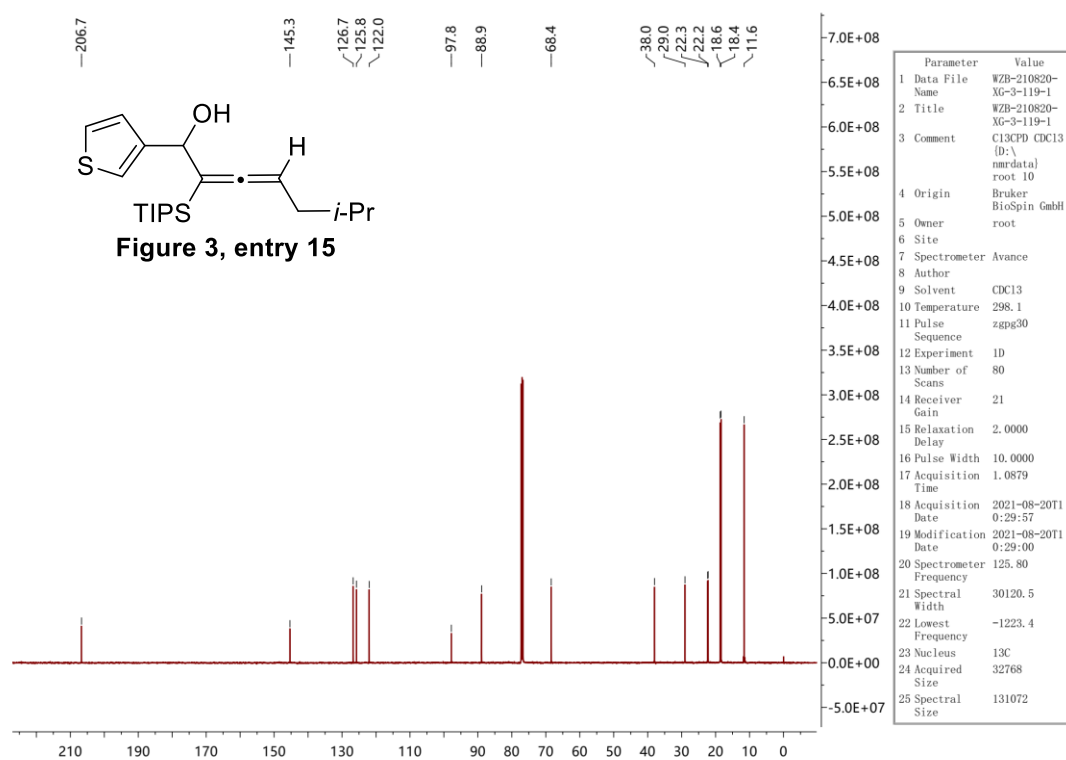

**Supplementary Figure 41.** <sup>13</sup>C NMR spectrum of compound 15

$^1\text{H}$  NMR (500 MHz, room temperature,  $\text{CDCl}_3$ )

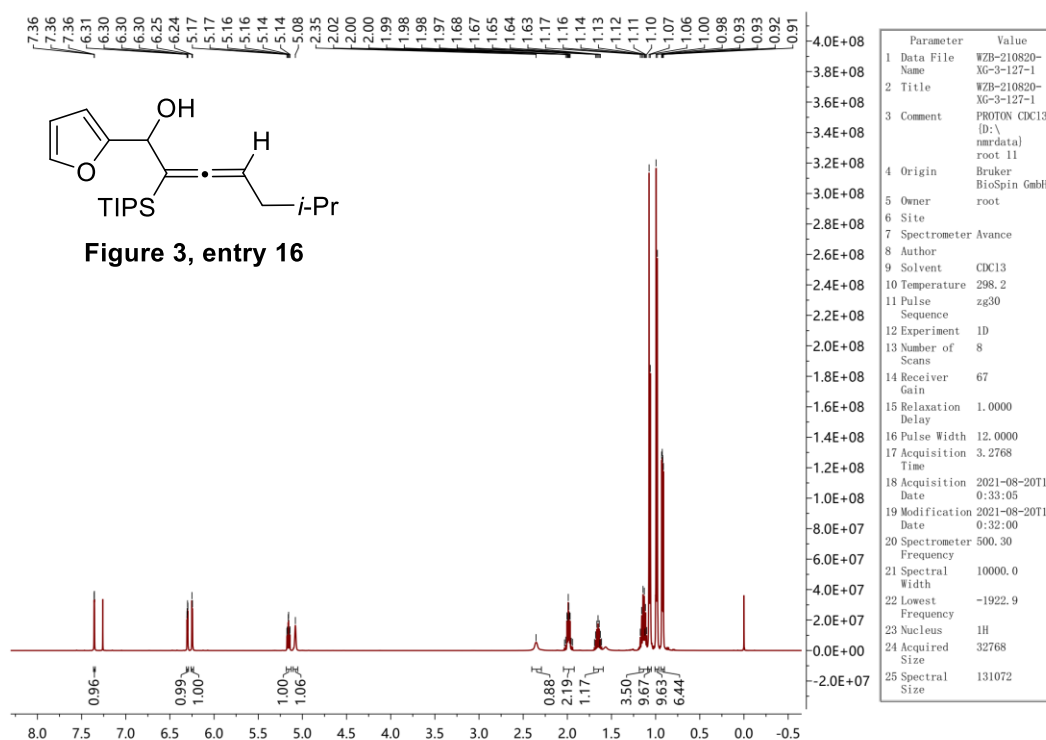

**Supplementary Figure 42.**  $^1\text{H}$  NMR spectrum of compound 16

$^{13}\text{C}$  NMR (126 MHz, room temperature,  $\text{CDCl}_3$ )

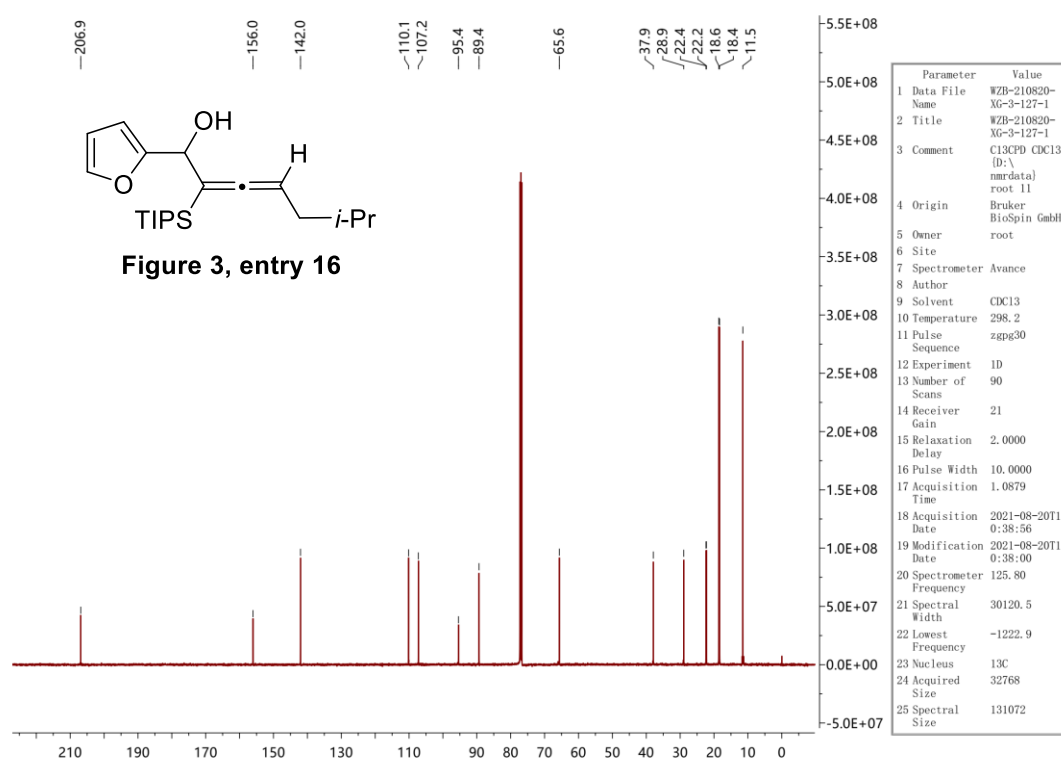

**Supplementary Figure 43.**  $^{13}\text{C}$  NMR spectrum of compound 16



<sup>1</sup>H NMR (500 MHz, room temperature, CDCl<sub>3</sub>)

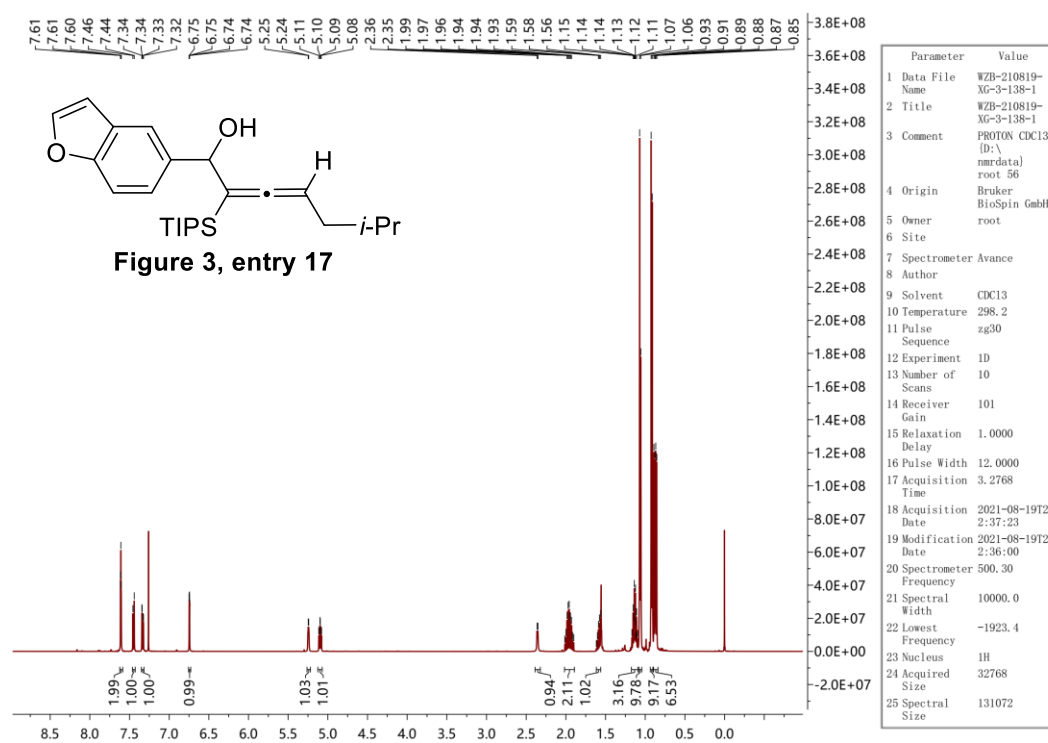

**Supplementary Figure 44.** <sup>1</sup>H NMR spectrum of compound 17

<sup>13</sup>C NMR (126 MHz, room temperature, CDCl<sub>3</sub>)

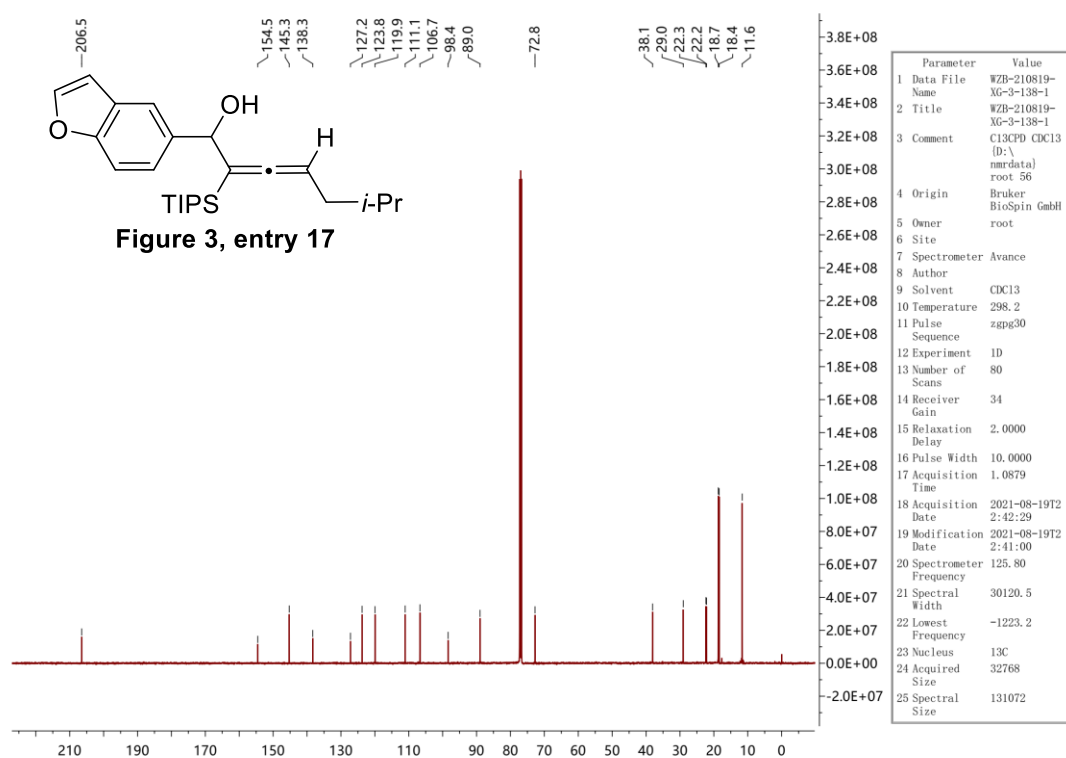

**Supplementary Figure 45.** <sup>13</sup>C NMR spectrum of compound 17

<sup>1</sup>H NMR (500 MHz, room temperature, CDCl<sub>3</sub>)

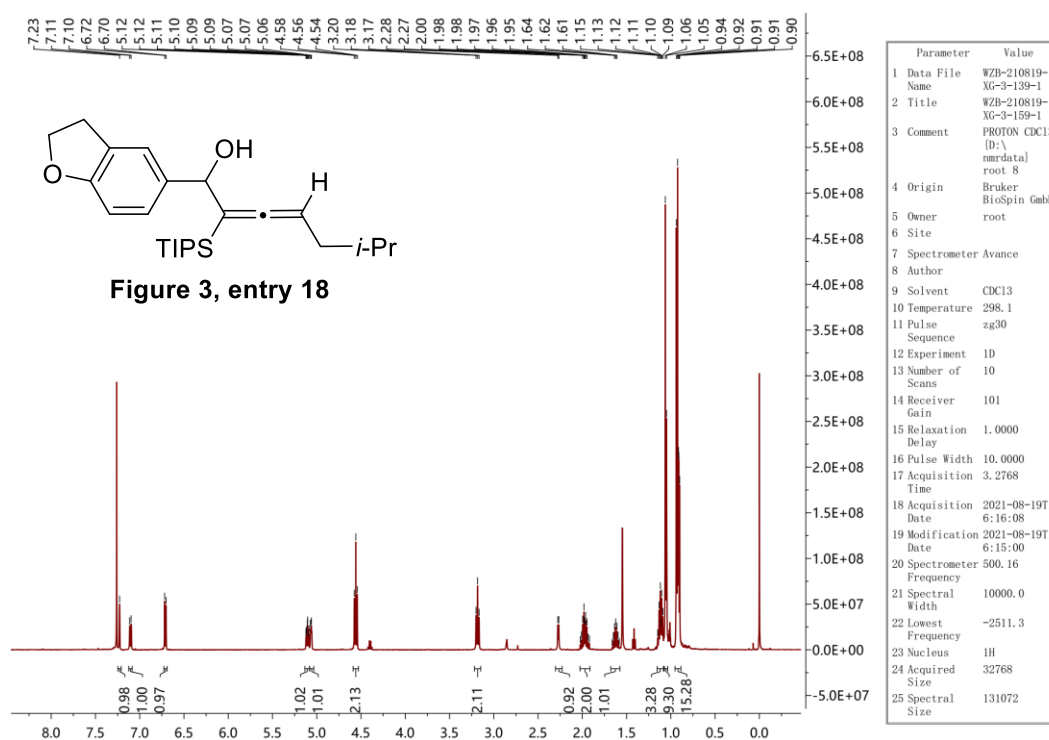

**Supplementary Figure 46.** <sup>1</sup>H NMR spectrum of compound 18

<sup>13</sup>C NMR (126 MHz, room temperature, CDCl<sub>3</sub>)

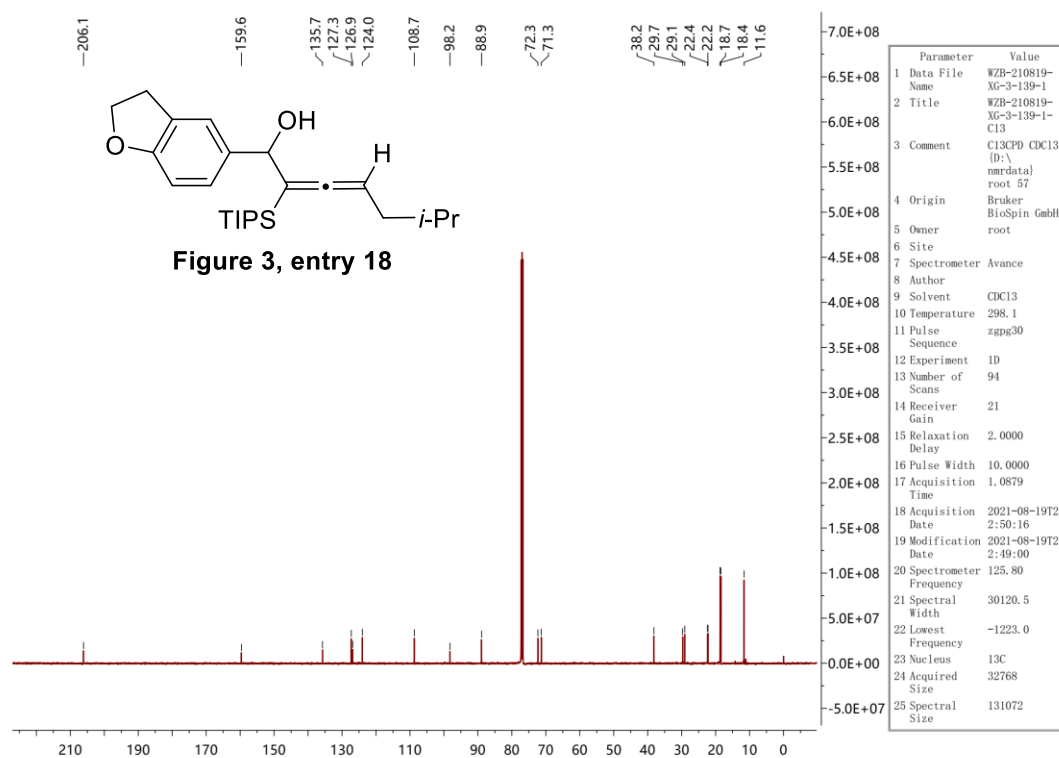

**Supplementary Figure 47.** <sup>13</sup>C NMR spectrum of compound 18

$^1\text{H}$  NMR (500 MHz, room temperature,  $\text{CDCl}_3$ )

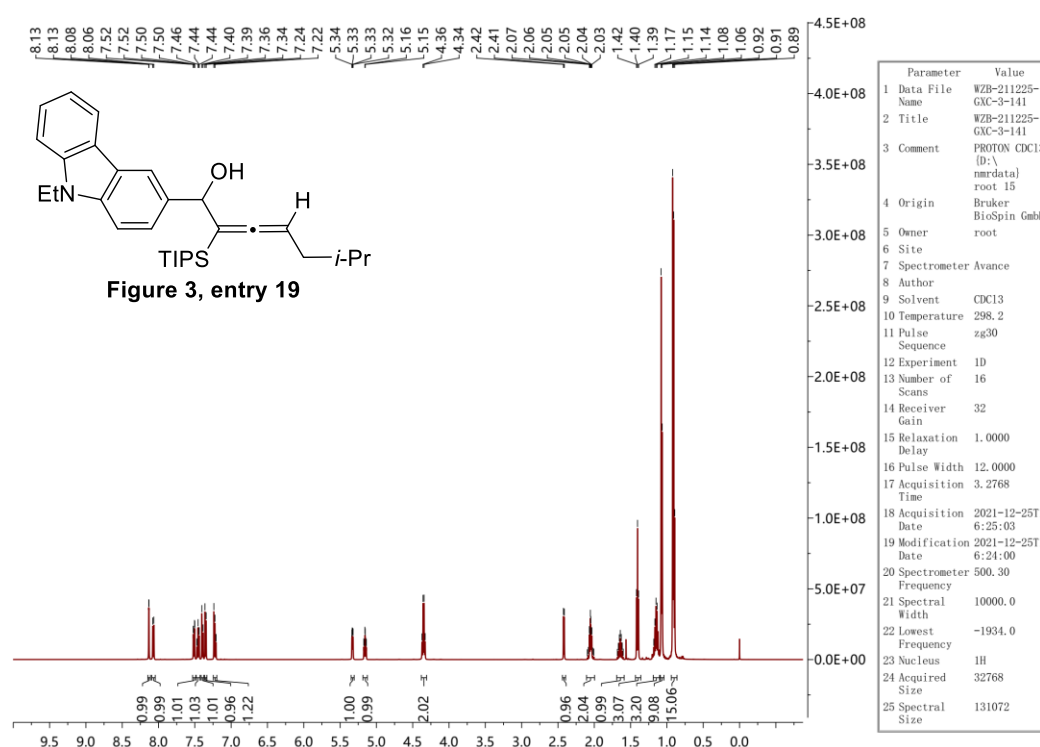

**Supplementary Figure 48.**  $^1\text{H}$  NMR spectrum of compound 19

$^{13}\text{C}$  NMR (126 MHz, room temperature,  $\text{CDCl}_3$ )

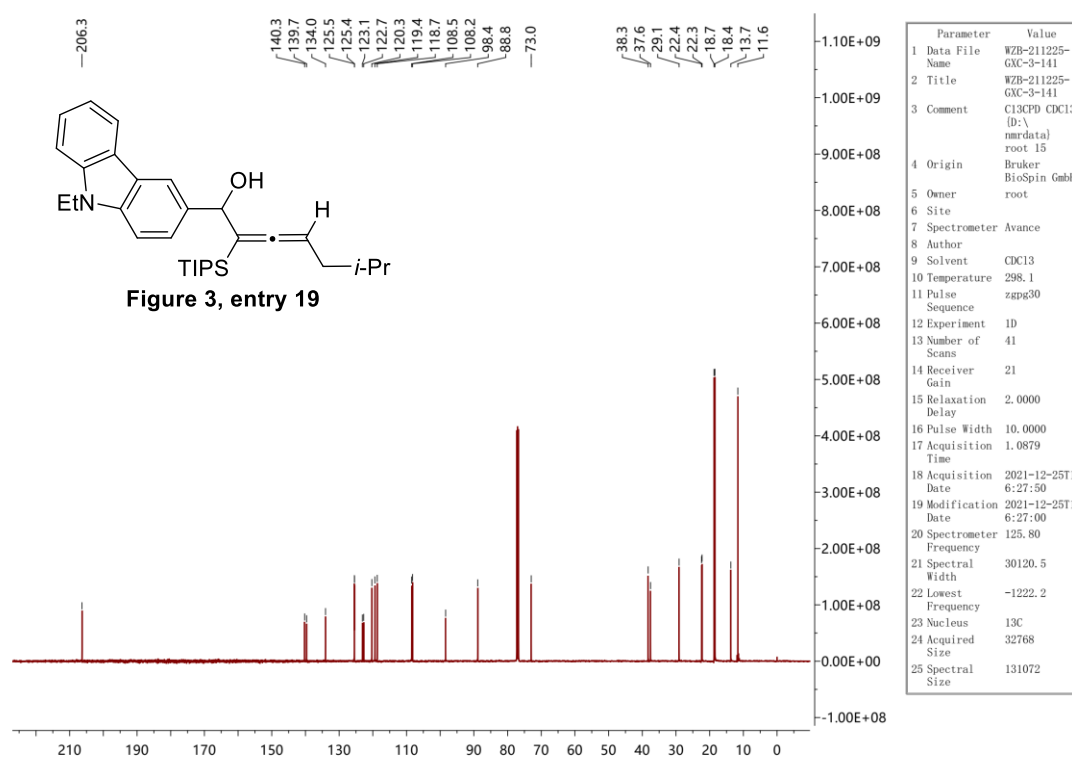

**Supplementary Figure 49.**  $^{13}\text{C}$  NMR spectrum of compound 19

<sup>1</sup>H NMR (500 MHz, room temperature, CDCl<sub>3</sub>)

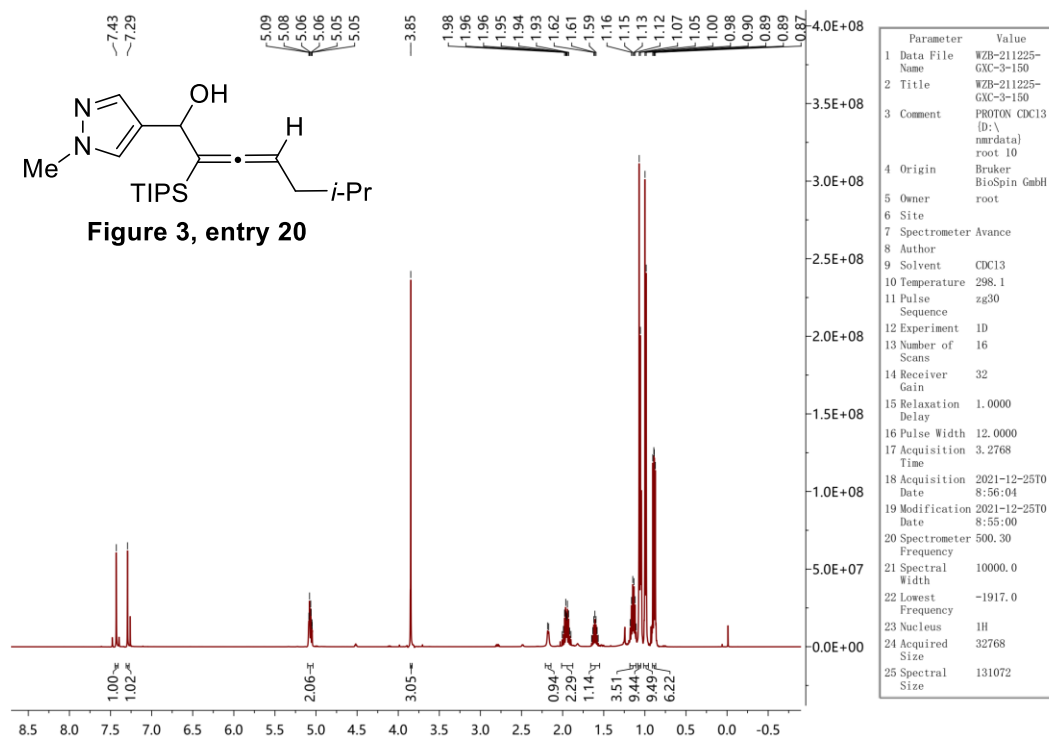

**Supplementary Figure 50.** <sup>1</sup>H NMR spectrum of compound 20

<sup>13</sup>C NMR (126 MHz, room temperature, CDCl<sub>3</sub>)

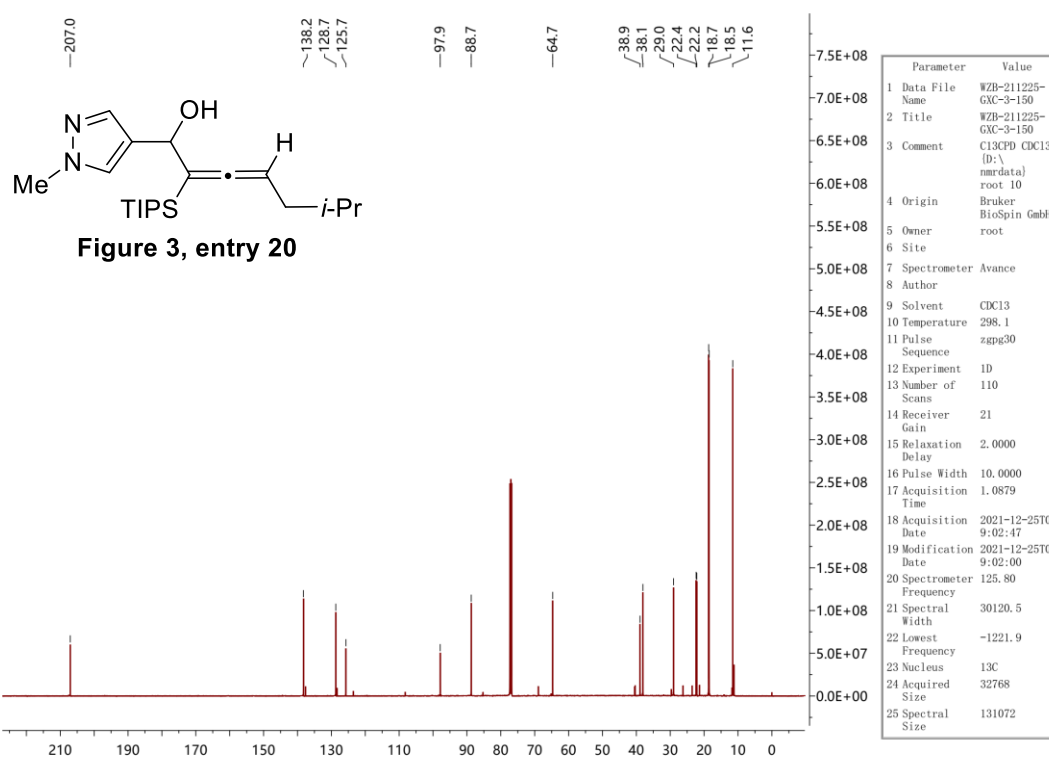

**Supplementary Figure 51.** <sup>13</sup>C NMR spectrum of compound 20

<sup>1</sup>H NMR (500 MHz, room temperature, CDCl<sub>3</sub>)

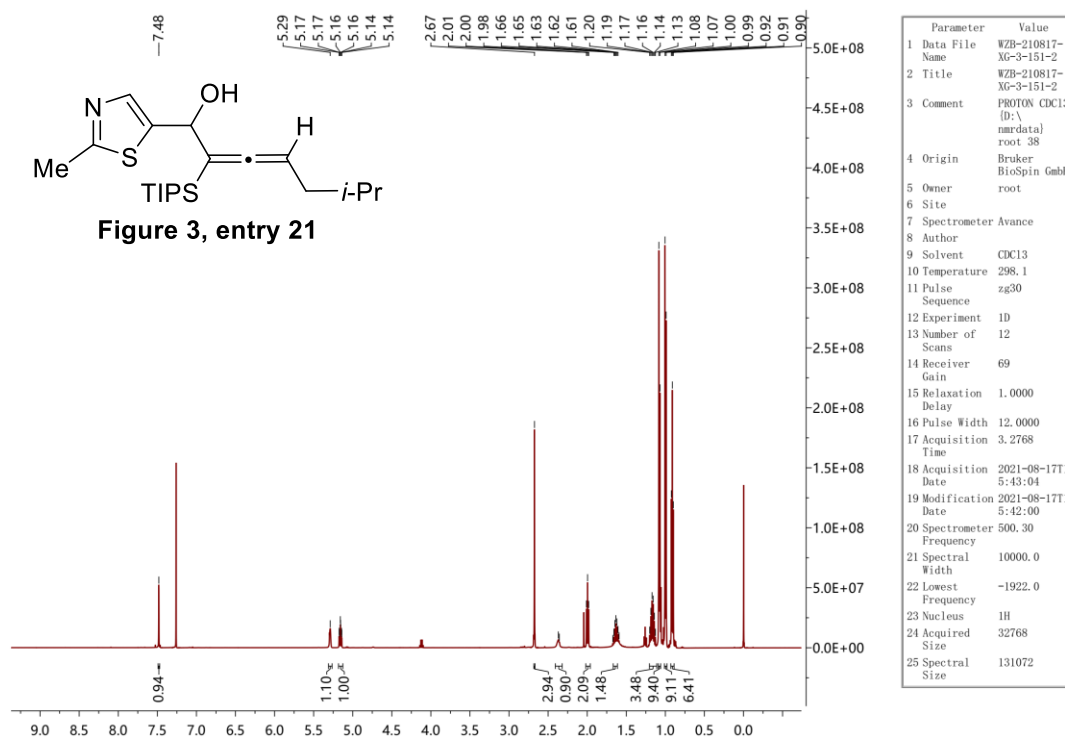

**Supplementary Figure 52.** <sup>1</sup>H NMR spectrum of compound 21

<sup>13</sup>C NMR (126 MHz, room temperature, CDCl<sub>3</sub>)

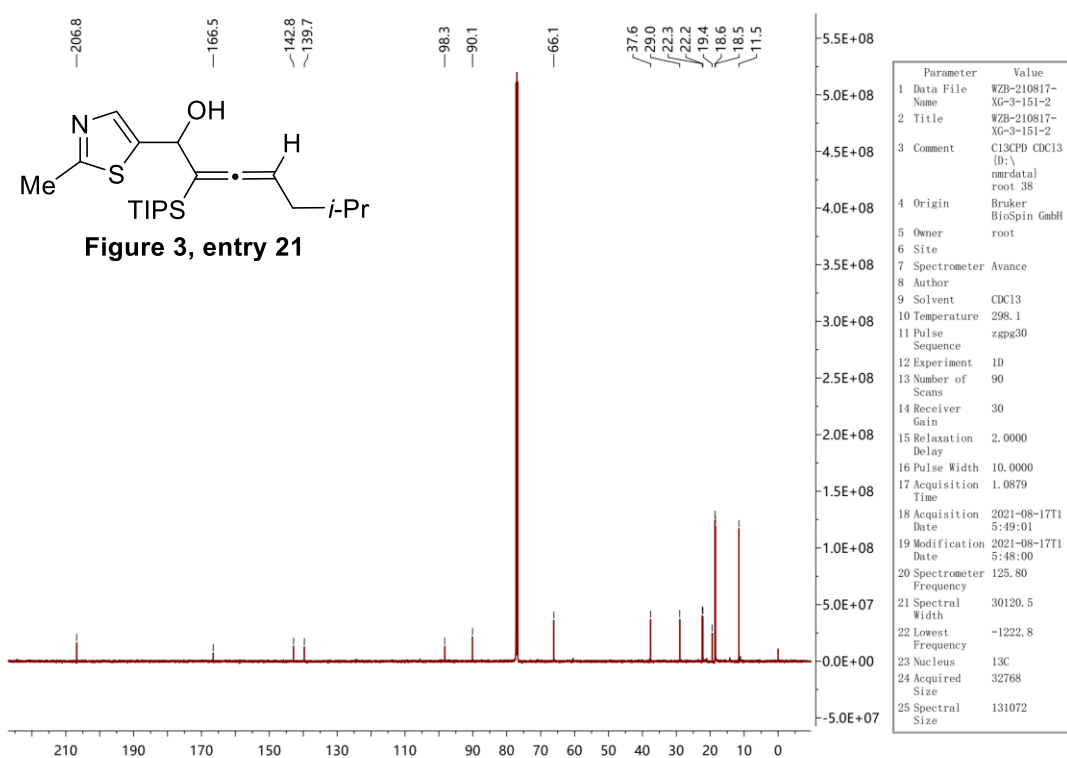

**Supplementary Figure 53.** <sup>13</sup>C NMR spectrum of compound 21

<sup>1</sup>H NMR (500 MHz, room temperature, CDCl<sub>3</sub>)

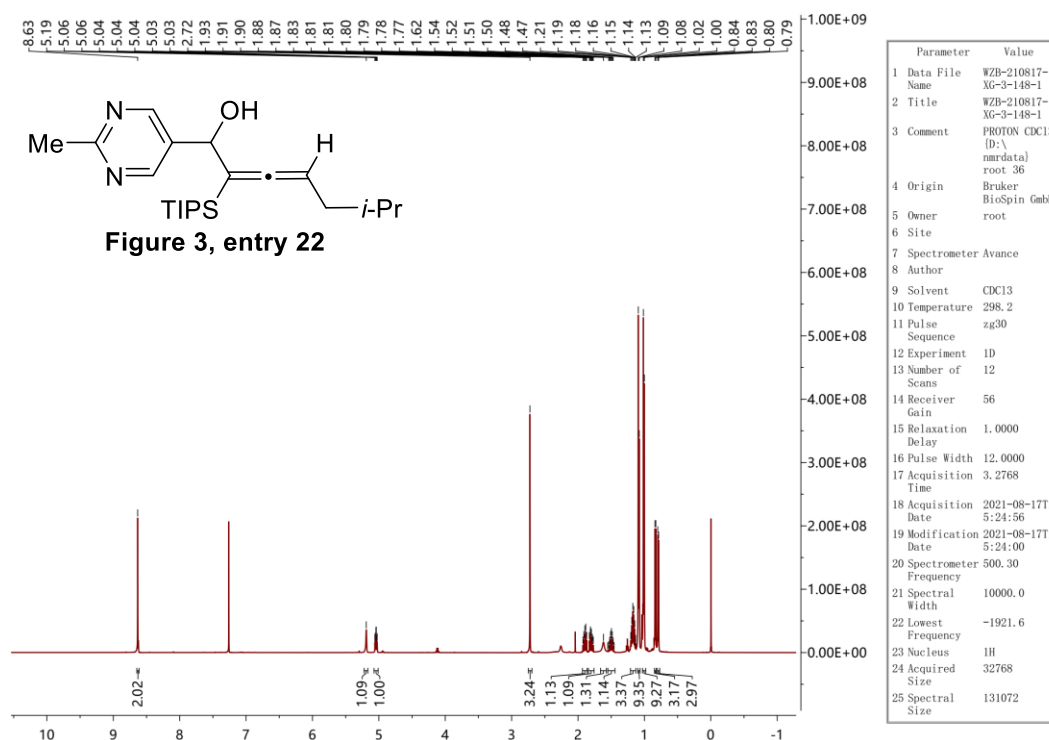

**Supplementary Figure 54.** <sup>1</sup>H NMR spectrum of compound 22

<sup>13</sup>C NMR (126 MHz, room temperature, CDCl<sub>3</sub>)

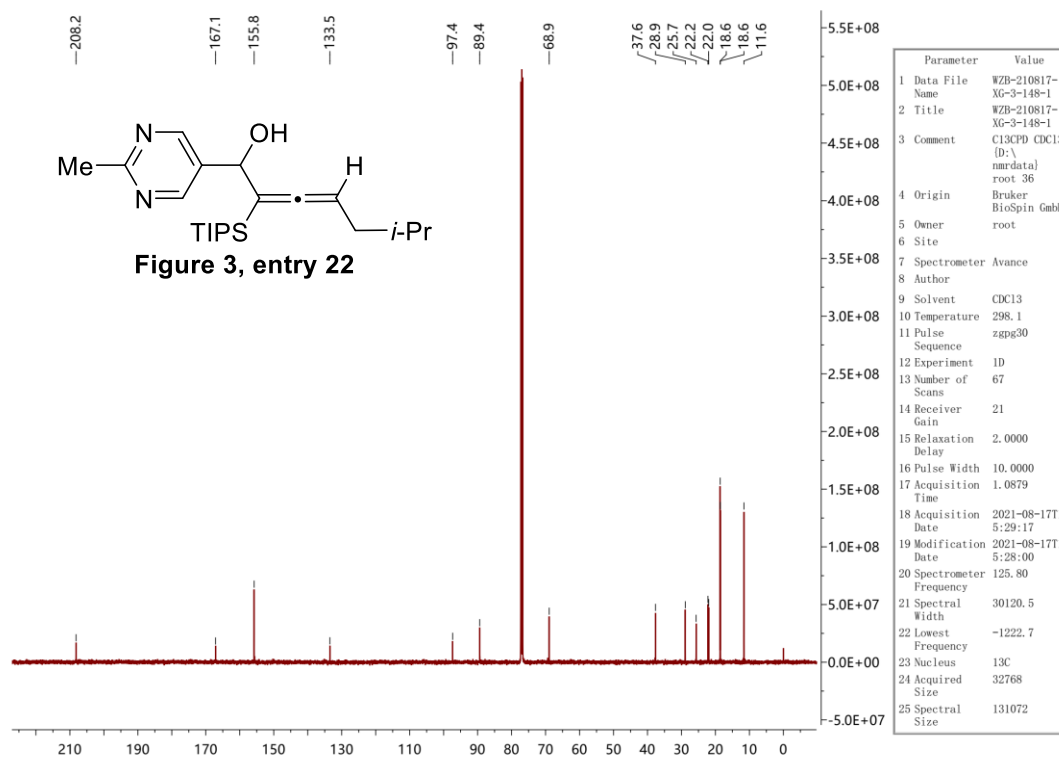

**Supplementary Figure 55.** <sup>13</sup>C NMR spectrum of compound 22

<sup>1</sup>H NMR (500 MHz, room temperature, CDCl<sub>3</sub>)

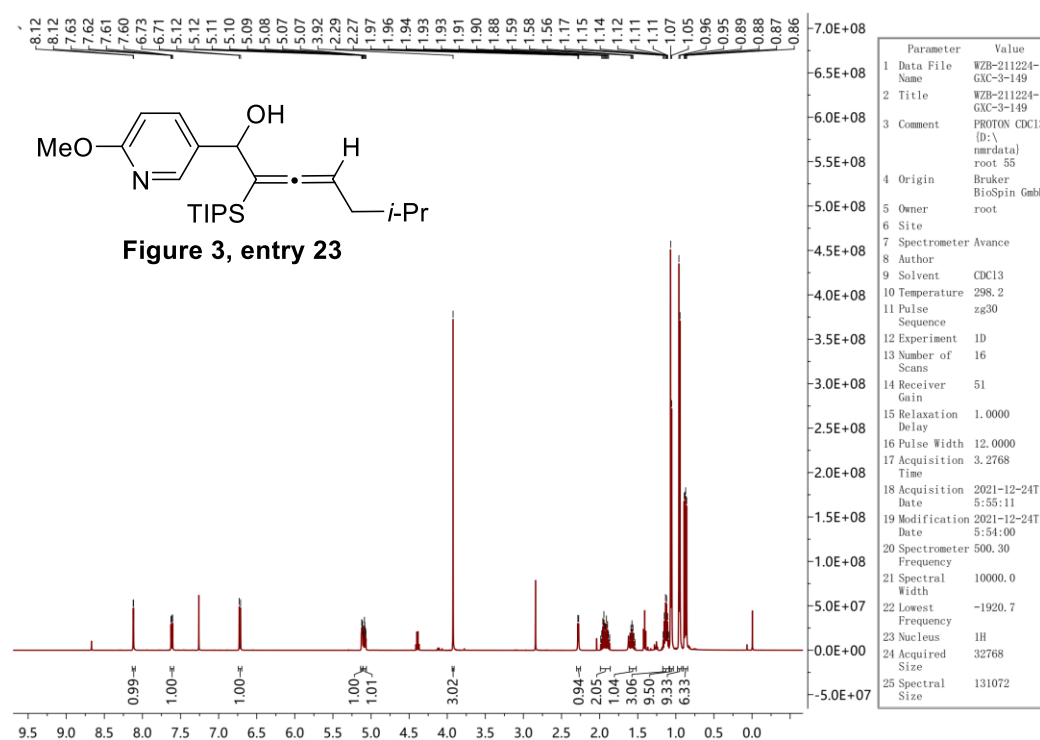

**Supplementary Figure 56.** <sup>1</sup>H NMR spectrum of compound 23

<sup>13</sup>C NMR (126 MHz, room temperature, CDCl<sub>3</sub>)

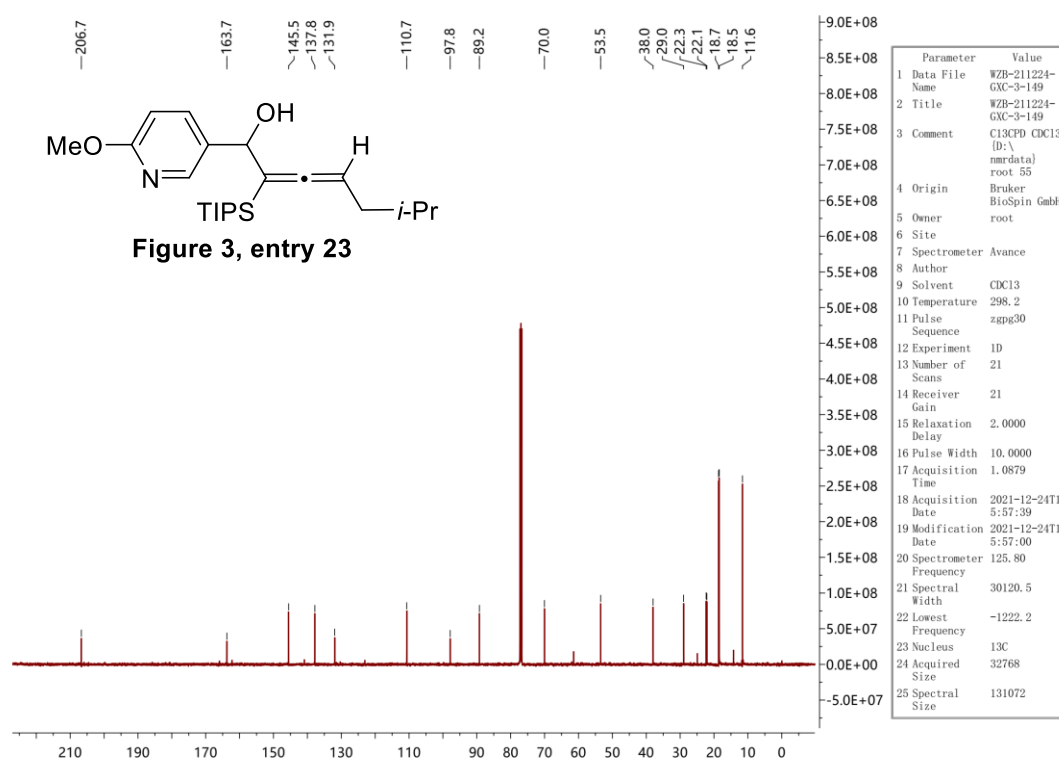

**Supplementary Figure 57.** <sup>13</sup>C NMR spectrum of compound 23

<sup>1</sup>H NMR (500 MHz, room temperature, CDCl<sub>3</sub>)

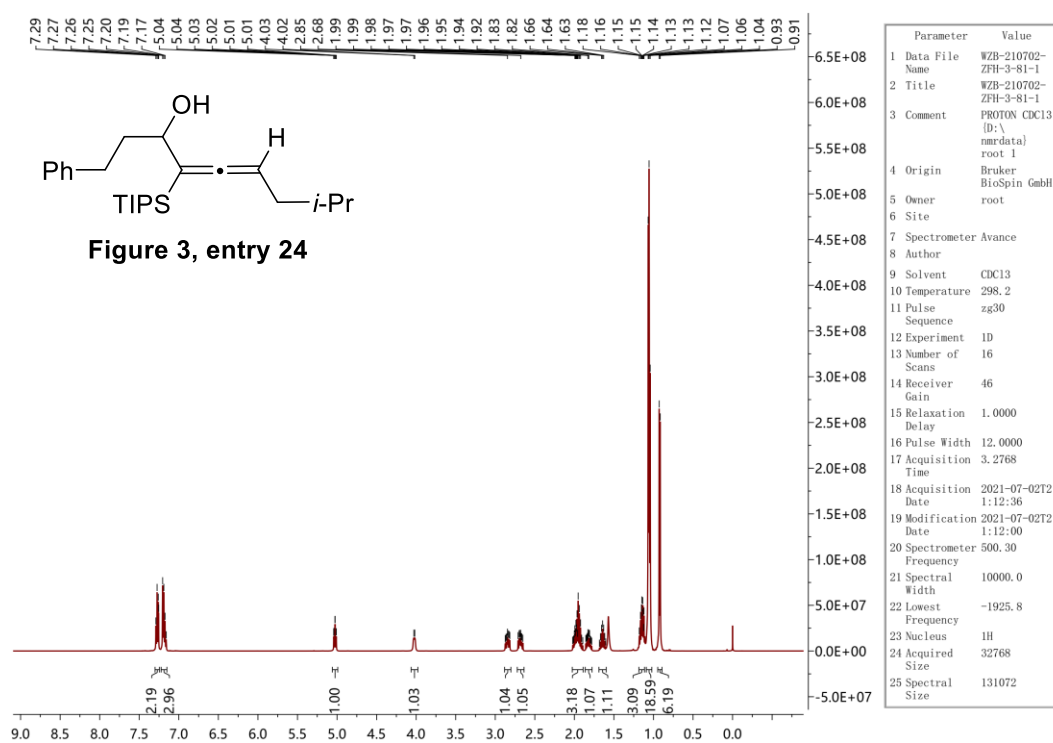

**Supplementary Figure 58.** <sup>1</sup>H NMR spectrum of compound 24

<sup>13</sup>C NMR (126 MHz, room temperature, CDCl<sub>3</sub>)

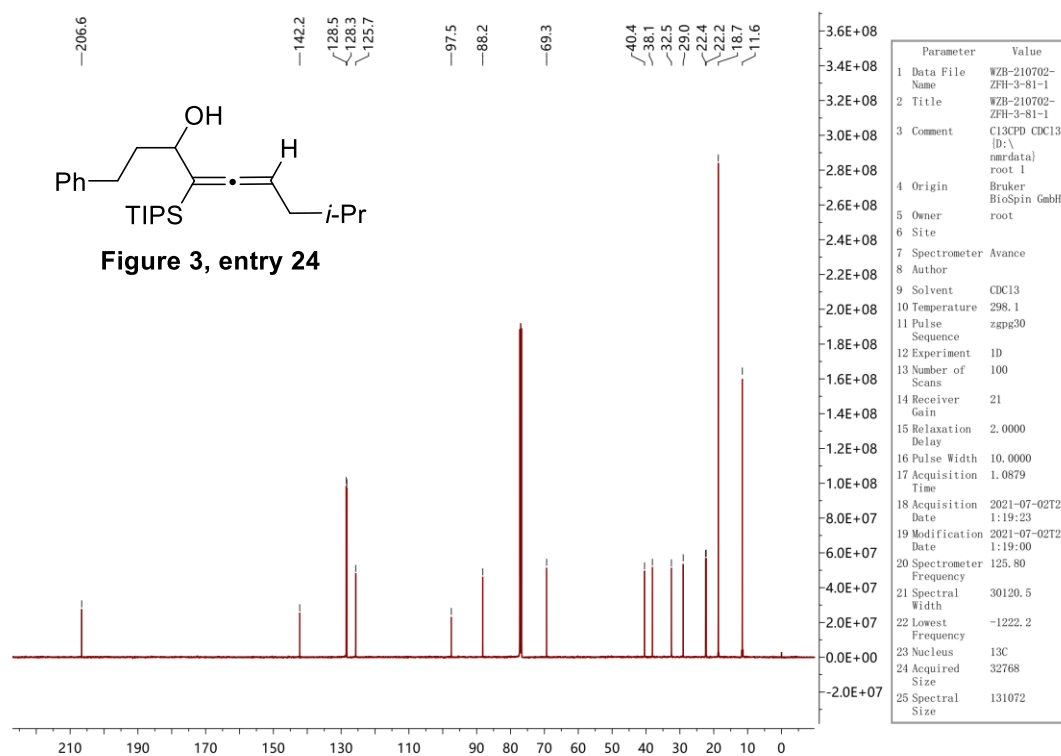

**Supplementary Figure 59.** <sup>13</sup>C NMR spectrum of compound 24



<sup>1</sup>H NMR (500 MHz, room temperature, CDCl<sub>3</sub>)

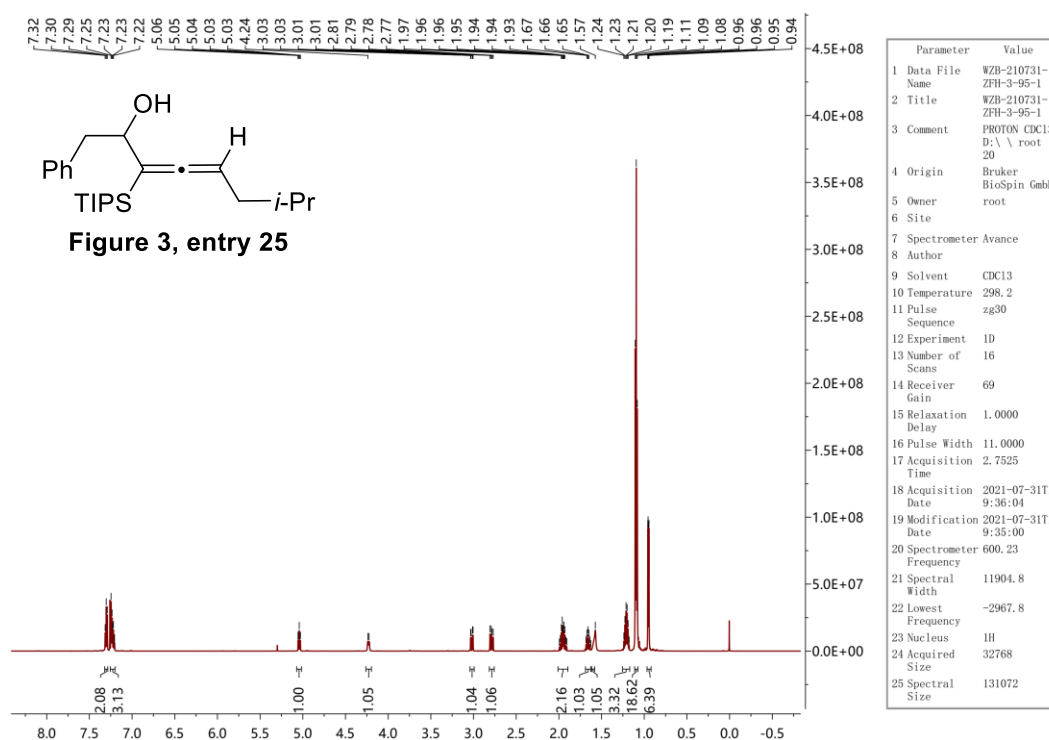

**Supplementary Figure 60.** <sup>1</sup>H NMR spectrum of compound 25

<sup>13</sup>C NMR (126 MHz, room temperature, CDCl<sub>3</sub>)

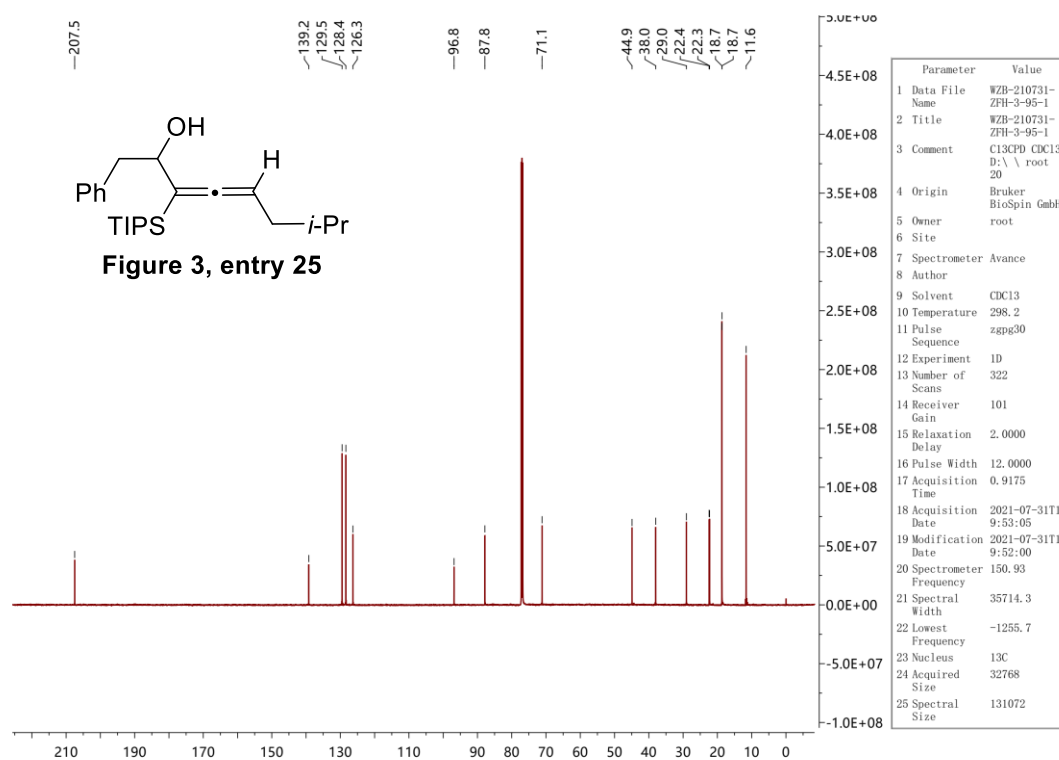

**Supplementary Figure 61.** <sup>13</sup>C NMR spectrum of compound 25

<sup>1</sup>H NMR (500 MHz, room temperature, CDCl<sub>3</sub>)

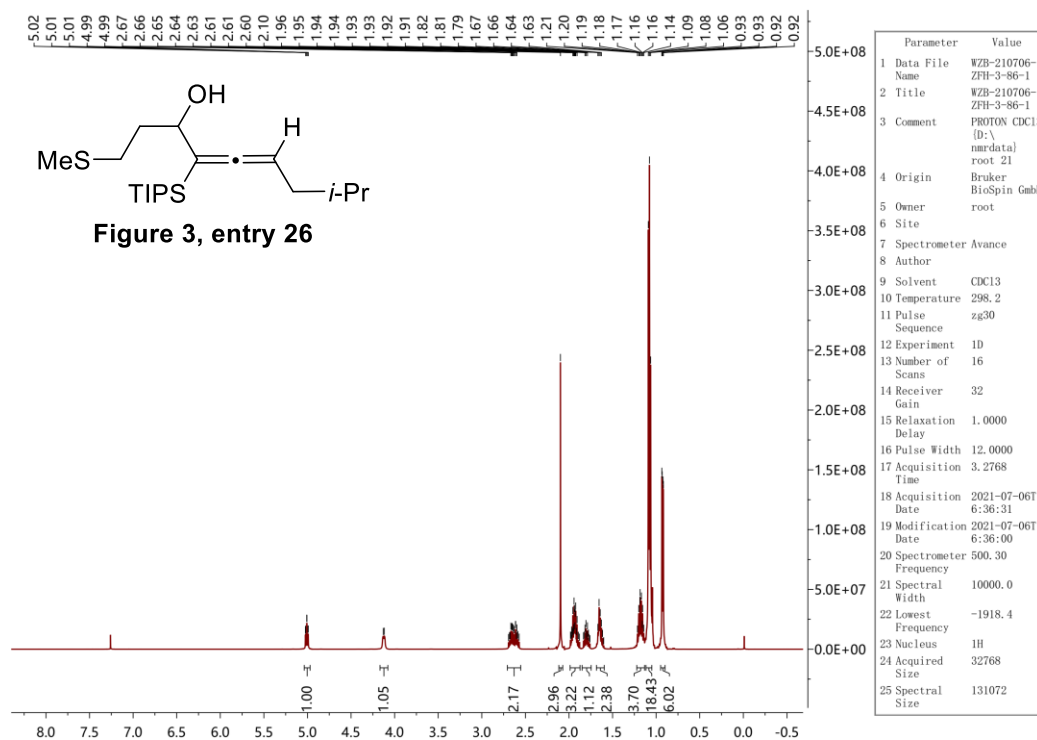

**Supplementary Figure 62.** <sup>1</sup>H NMR spectrum of compound 26

<sup>13</sup>C NMR (126 MHz, room temperature, CDCl<sub>3</sub>)

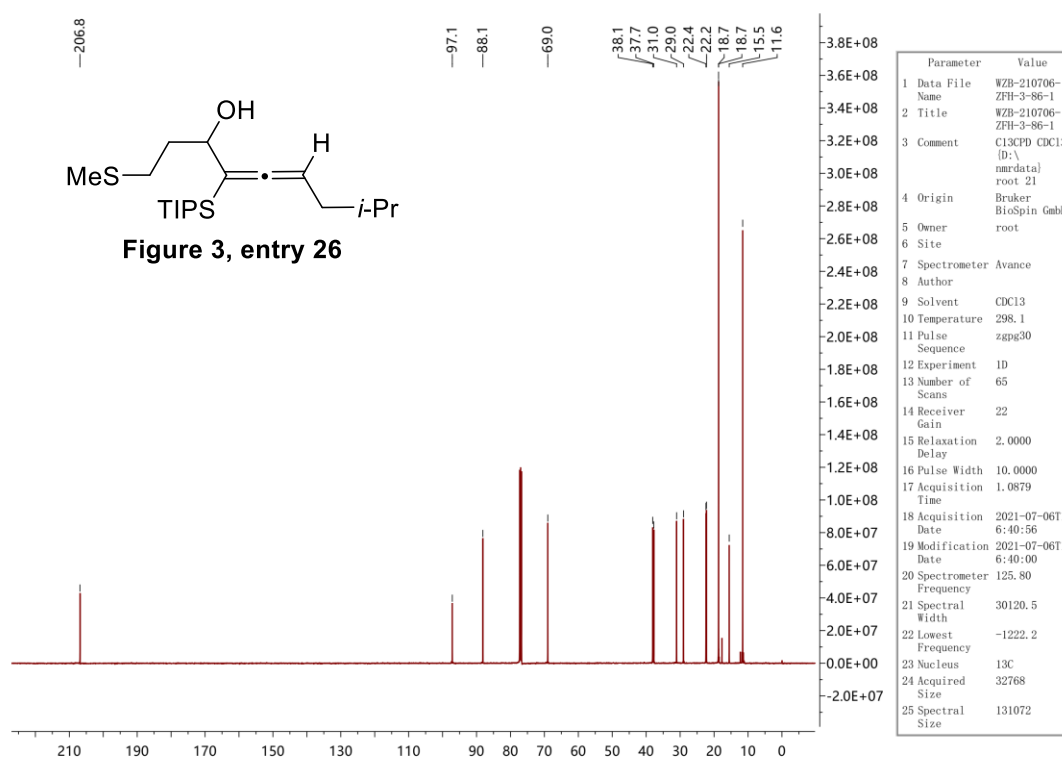

**Supplementary Figure 63.** <sup>13</sup>C NMR spectrum of compound 26

<sup>1</sup>H NMR (500 MHz, room temperature, CDCl<sub>3</sub>)

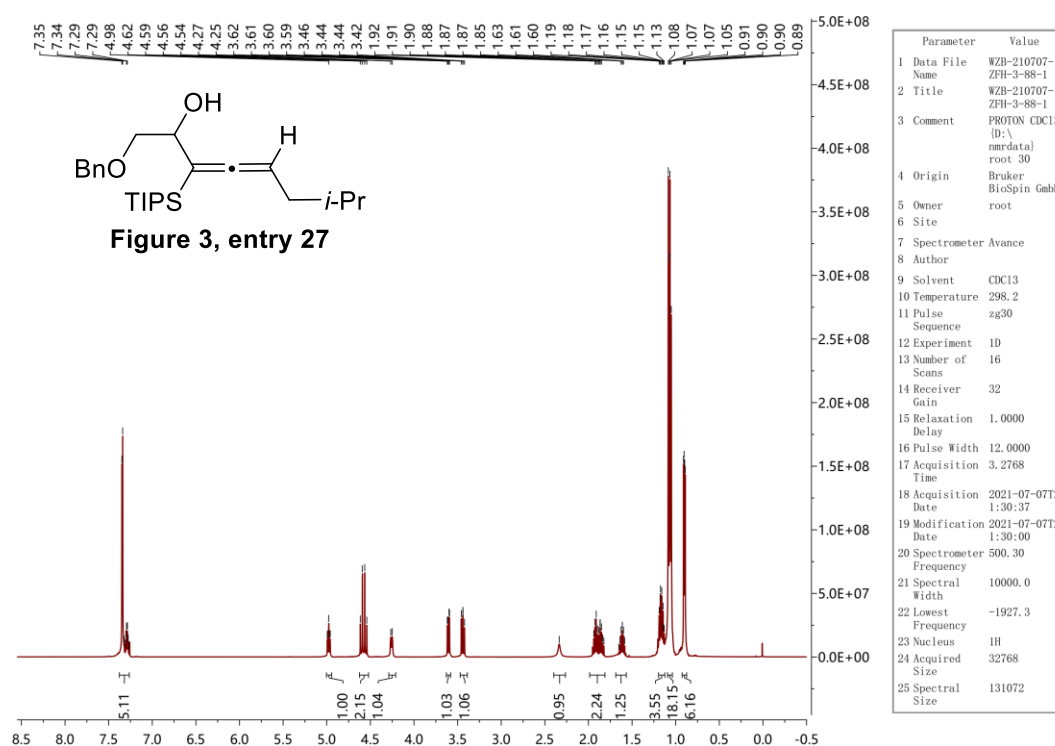

**Supplementary Figure 64.** <sup>1</sup>H NMR spectrum of compound 27

<sup>13</sup>C NMR (126 MHz, room temperature, CDCl<sub>3</sub>)

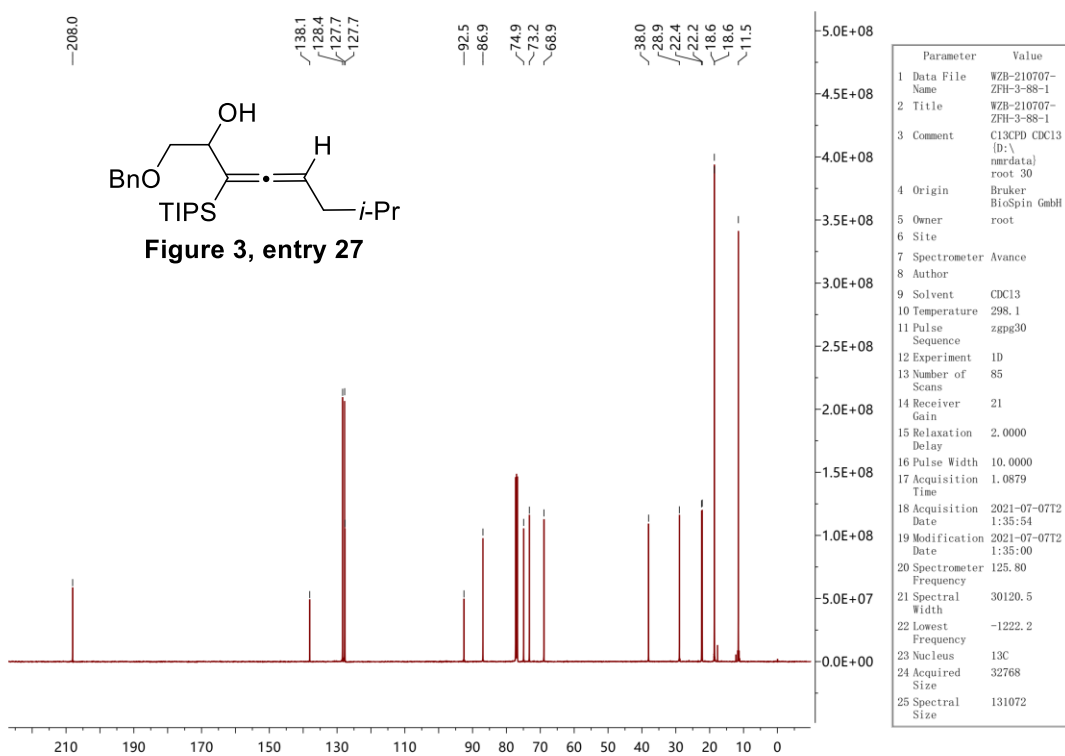

**Supplementary Figure 65.** <sup>13</sup>C NMR spectrum of compound 27

<sup>1</sup>H NMR (500 MHz, room temperature, CDCl<sub>3</sub>)

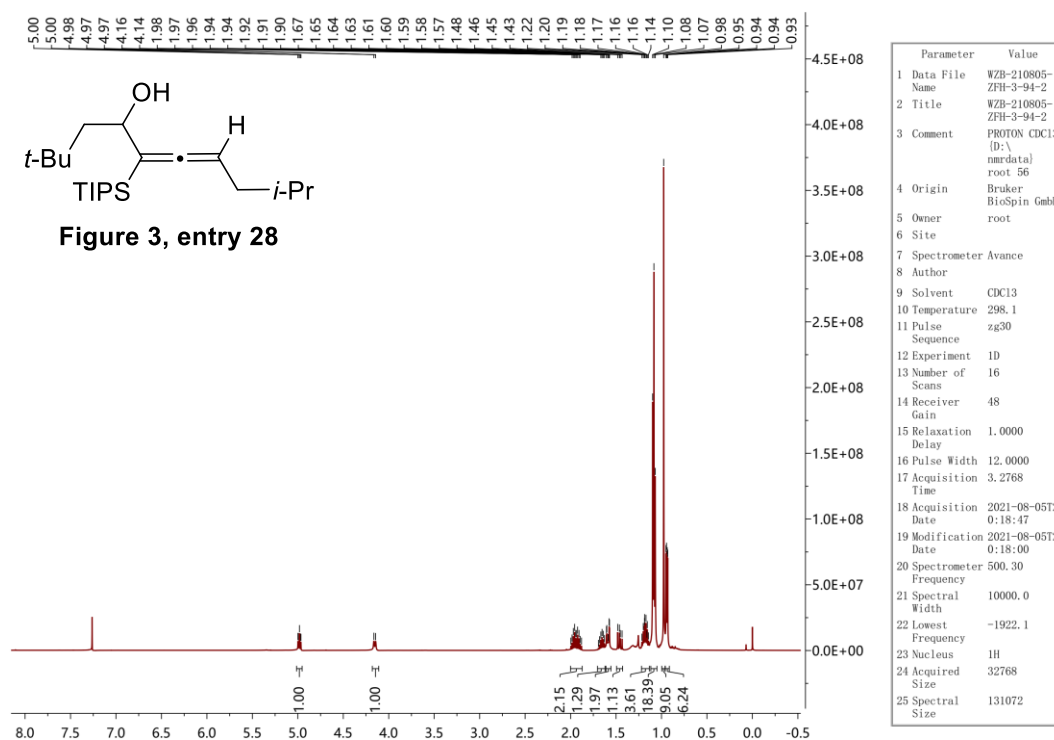

**Supplementary Figure 66.** <sup>1</sup>H NMR spectrum of compound 28

<sup>13</sup>C NMR (126 MHz, room temperature, CDCl<sub>3</sub>)

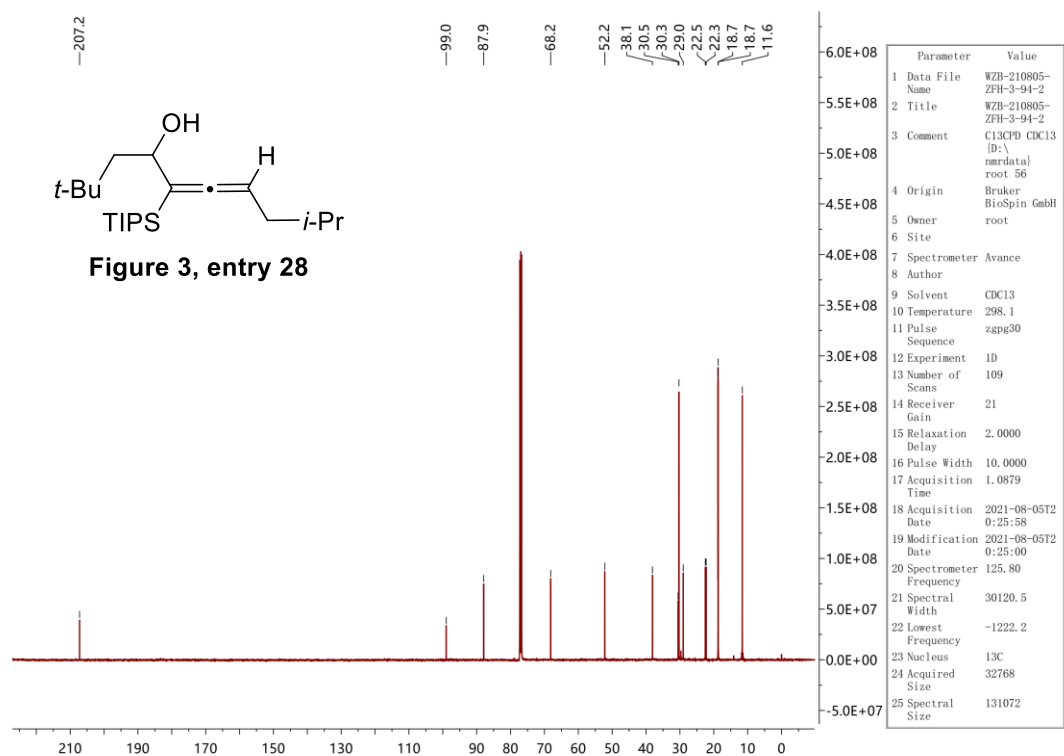

**Supplementary Figure 67.** <sup>13</sup>C NMR spectrum of compound 28

<sup>1</sup>H NMR (500 MHz, room temperature, CDCl<sub>3</sub>)

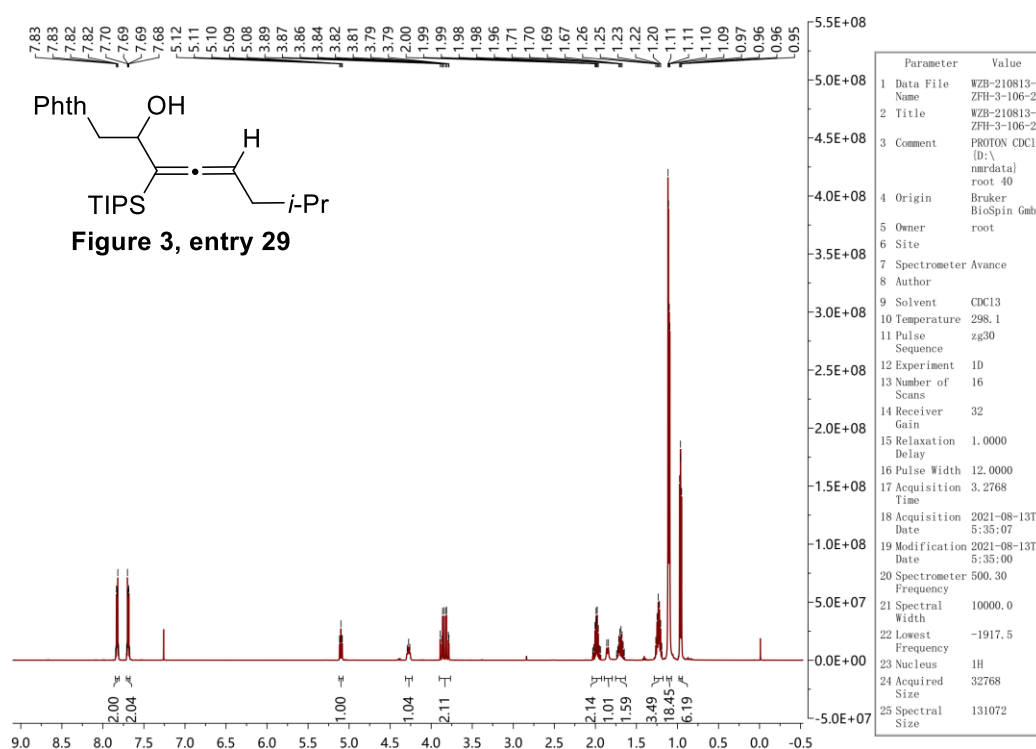

**Supplementary Figure 68.** <sup>1</sup>H NMR spectrum of compound 29

<sup>13</sup>C NMR (126 MHz, room temperature, CDCl<sub>3</sub>)

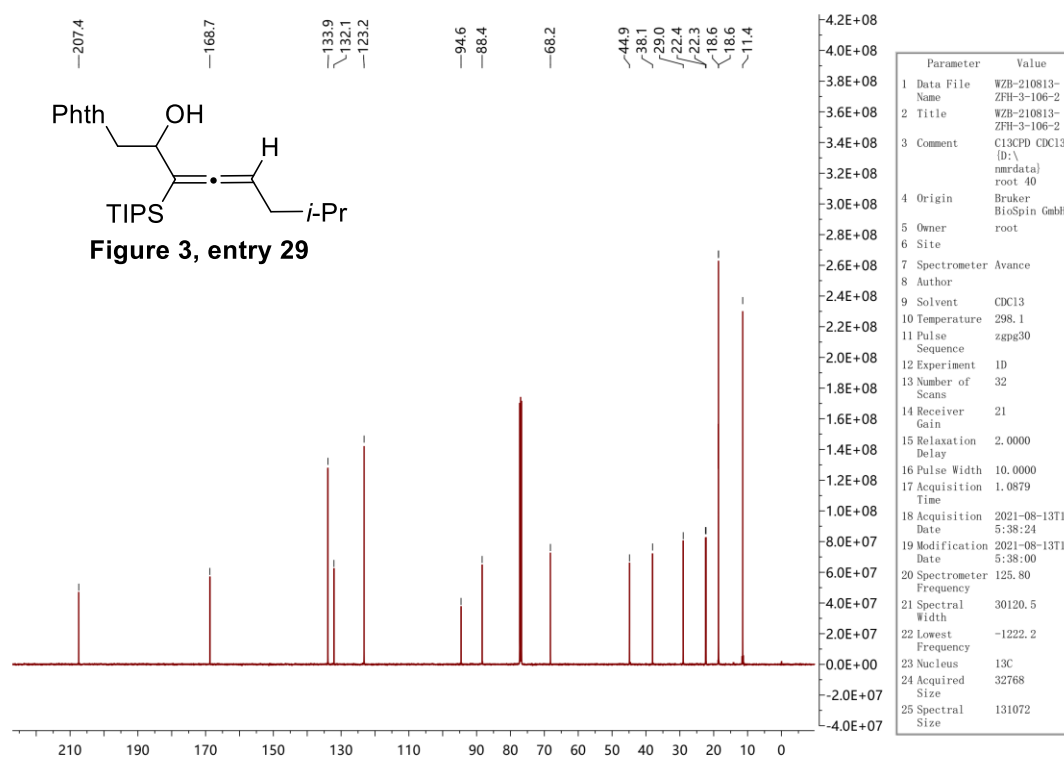

**Supplementary Figure 69.** <sup>13</sup>C NMR spectrum of compound 29

$^1\text{H}$  NMR (500 MHz, room temperature,  $\text{CDCl}_3$ )

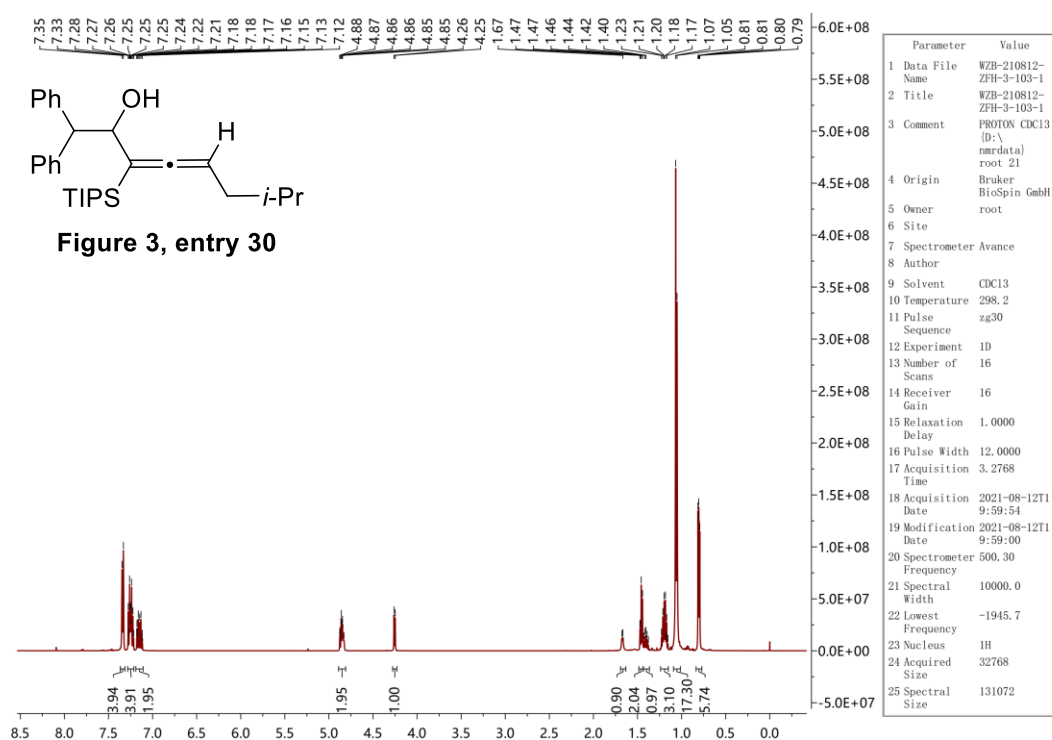

**Supplementary Figure 70.**  $^1\text{H}$  NMR spectrum of compound 30

$^{13}\text{C}$  NMR (126 MHz, room temperature,  $\text{CDCl}_3$ )

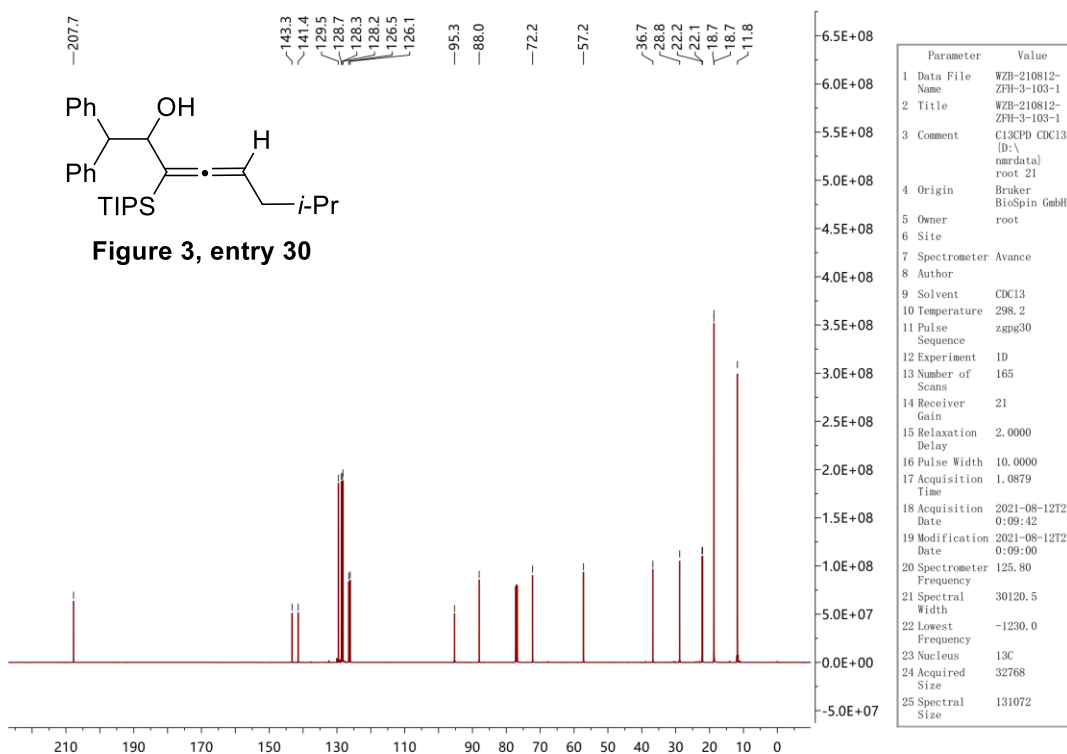

**Supplementary Figure 71.**  $^{13}\text{C}$  NMR spectrum of compound 30

<sup>1</sup>H NMR (500 MHz, room temperature, CDCl<sub>3</sub>)

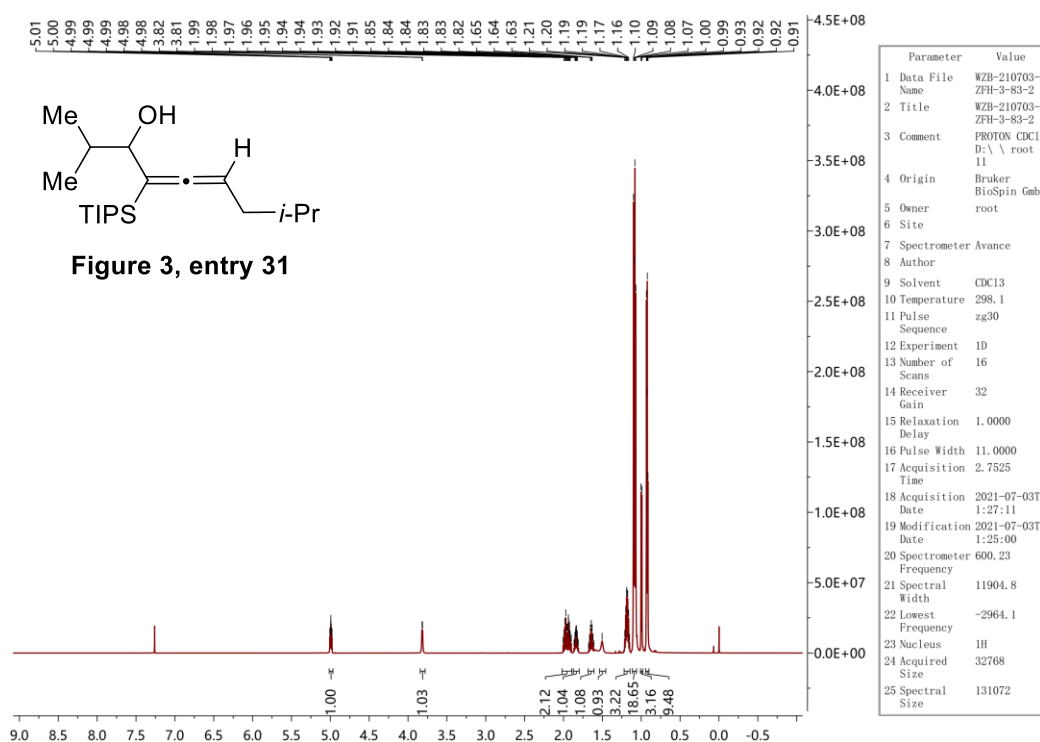

**Supplementary Figure 72.** <sup>1</sup>H NMR spectrum of compound 31

<sup>13</sup>C NMR (126 MHz, room temperature, CDCl<sub>3</sub>)

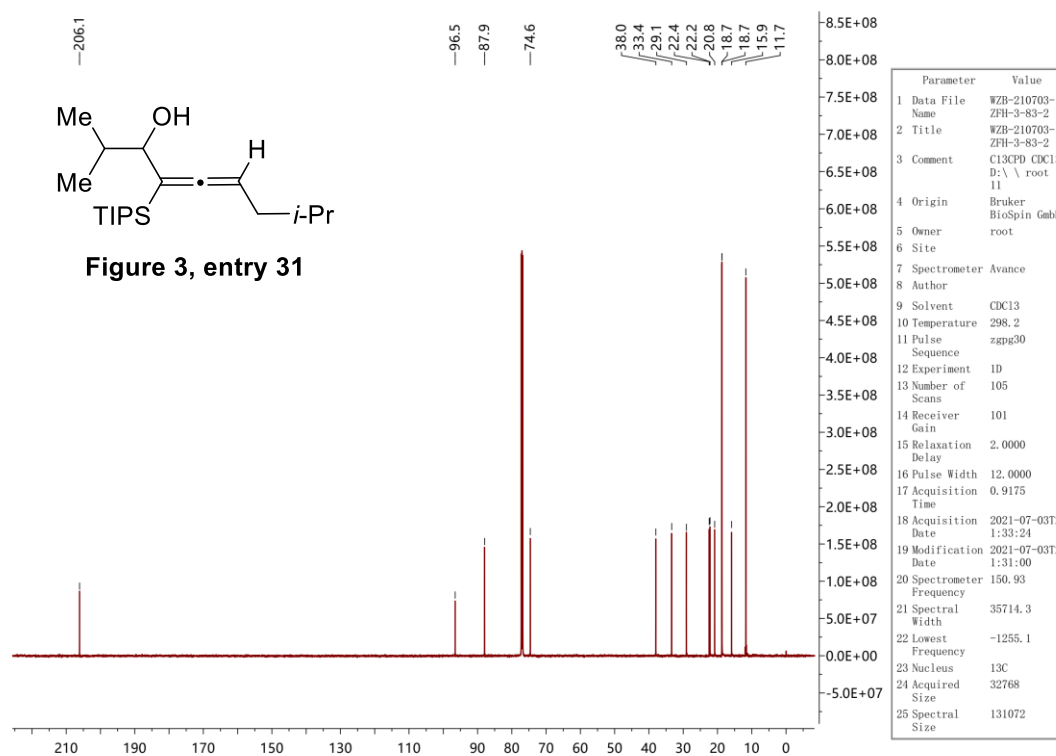

**Supplementary Figure 73.** <sup>13</sup>C NMR spectrum of compound 31

$^1\text{H}$  NMR (500 MHz, room temperature,  $\text{CDCl}_3$ )

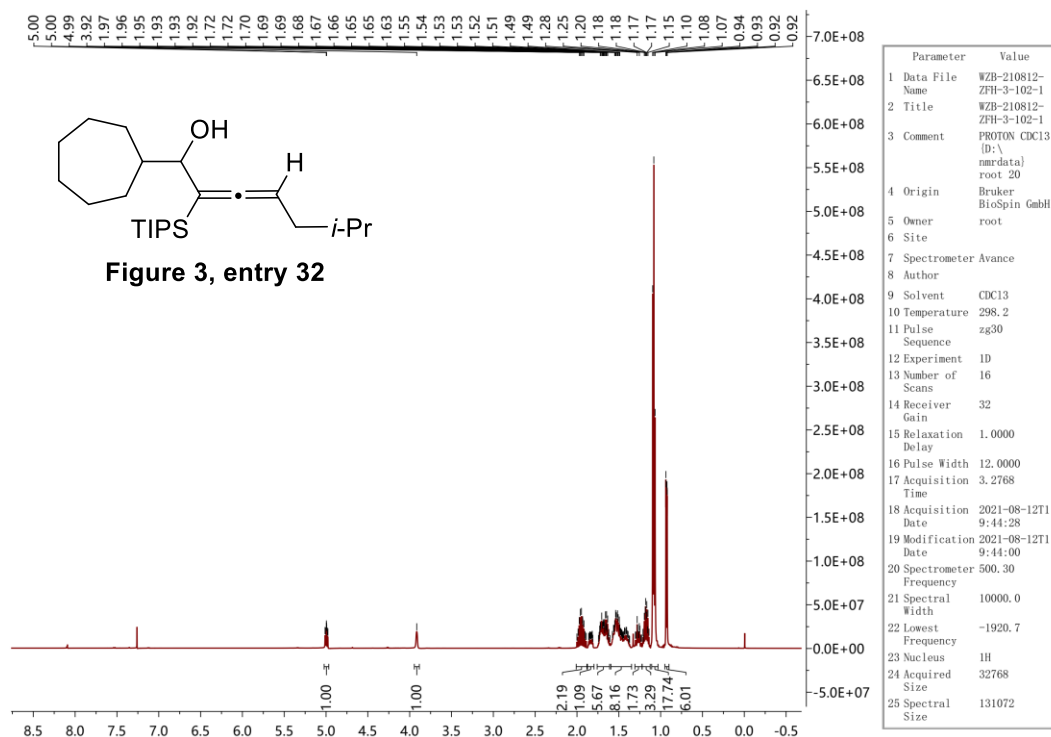

**Supplementary Figure 74.**  $^1\text{H}$  NMR spectrum of compound 32

$^{13}\text{C}$  NMR (126 MHz, room temperature,  $\text{CDCl}_3$ )

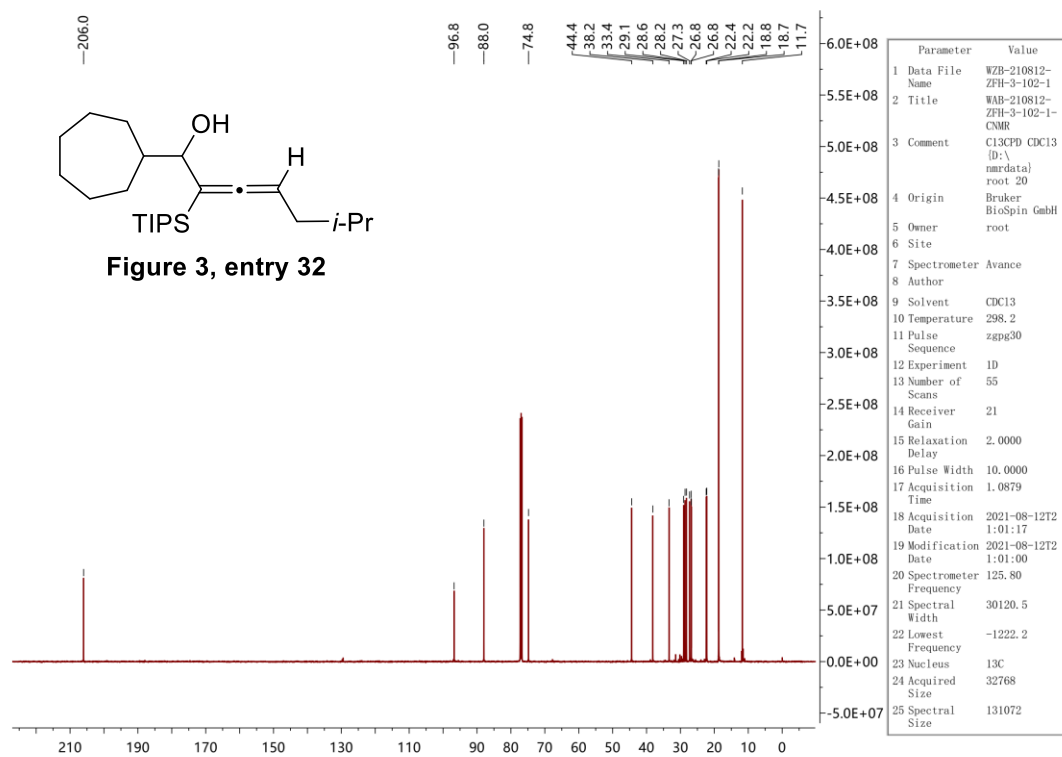

**Supplementary Figure 75.**  $^{13}\text{C}$  NMR spectrum of compound 32



<sup>1</sup>H NMR (500 MHz, room temperature, CDCl<sub>3</sub>)

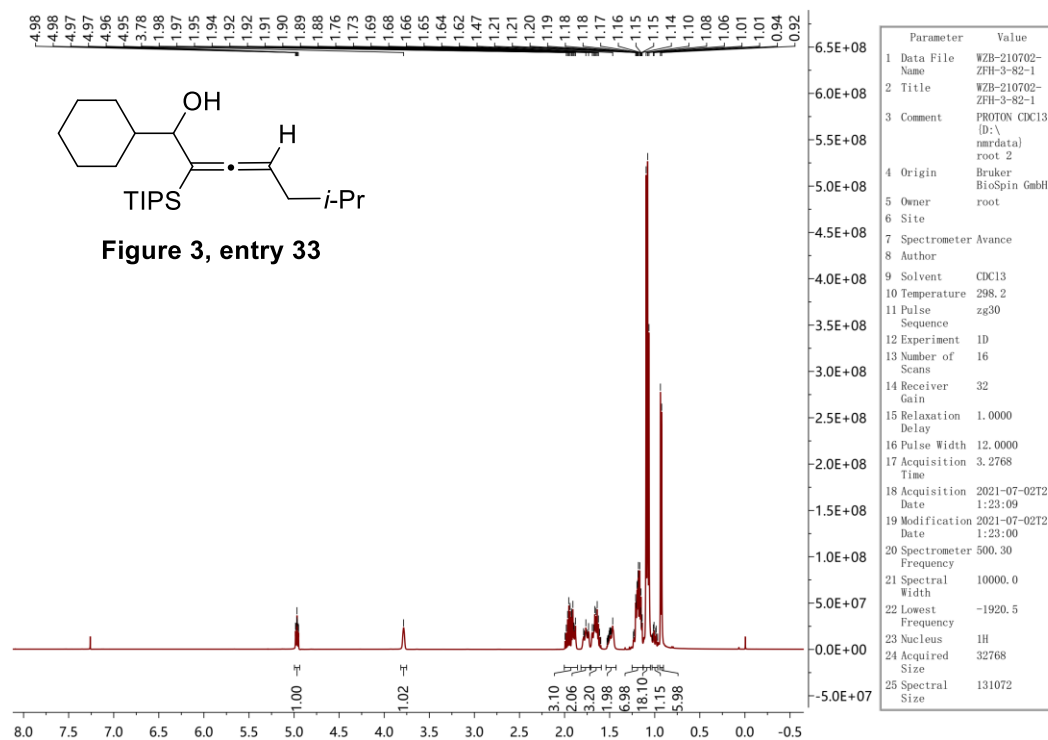

**Supplementary Figure 76.** <sup>1</sup>H NMR spectrum of compound 33

<sup>13</sup>C NMR (126 MHz, room temperature, CDCl<sub>3</sub>)

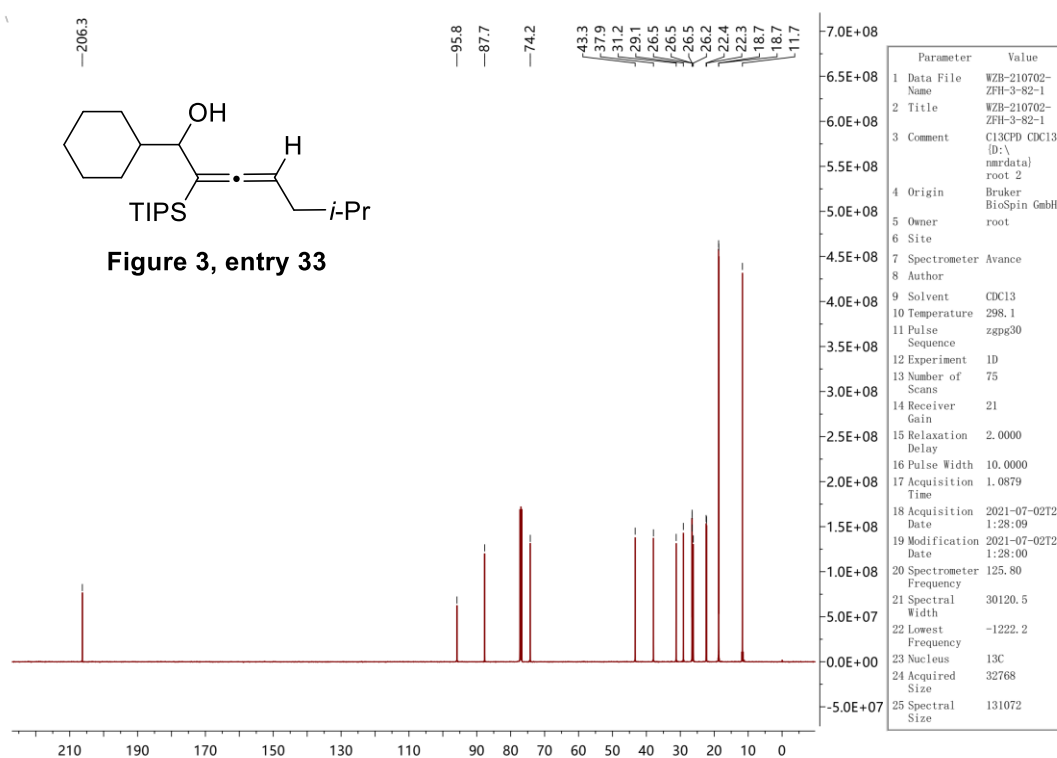

**Supplementary Figure 77.** <sup>13</sup>C NMR spectrum of compound 33

$^1\text{H}$  NMR (500 MHz, room temperature,  $\text{CDCl}_3$ )

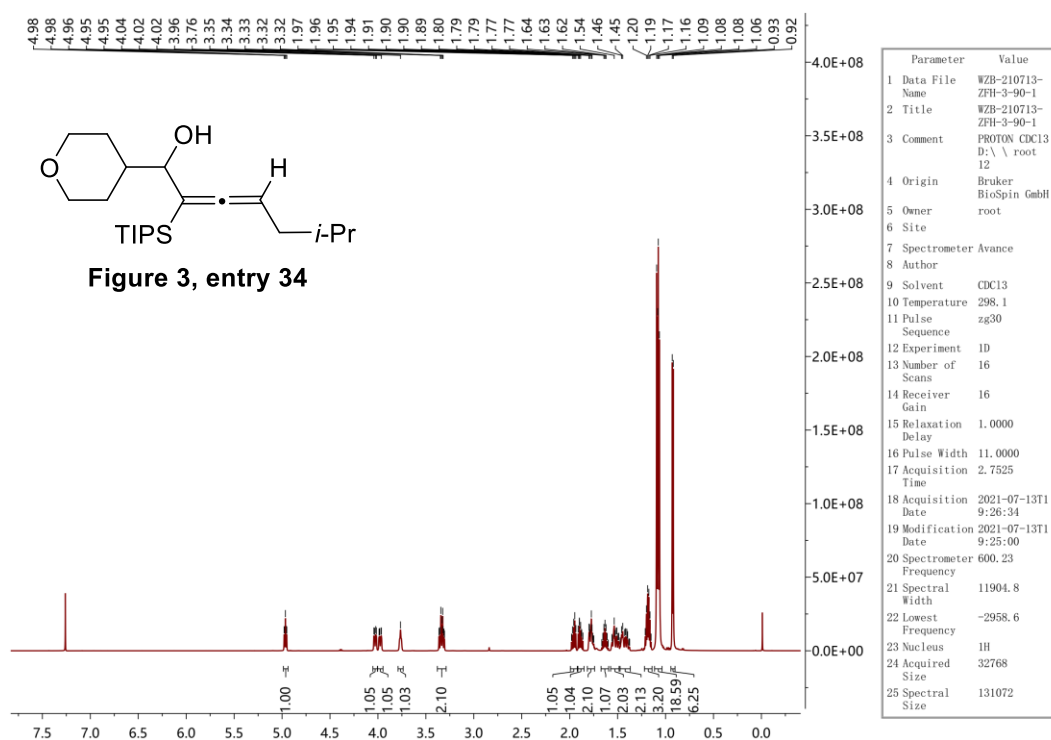

**Supplementary Figure 78.**  $^1\text{H}$  NMR spectrum of compound 34

$^{13}\text{C}$  NMR (126 MHz, room temperature,  $\text{CDCl}_3$ )

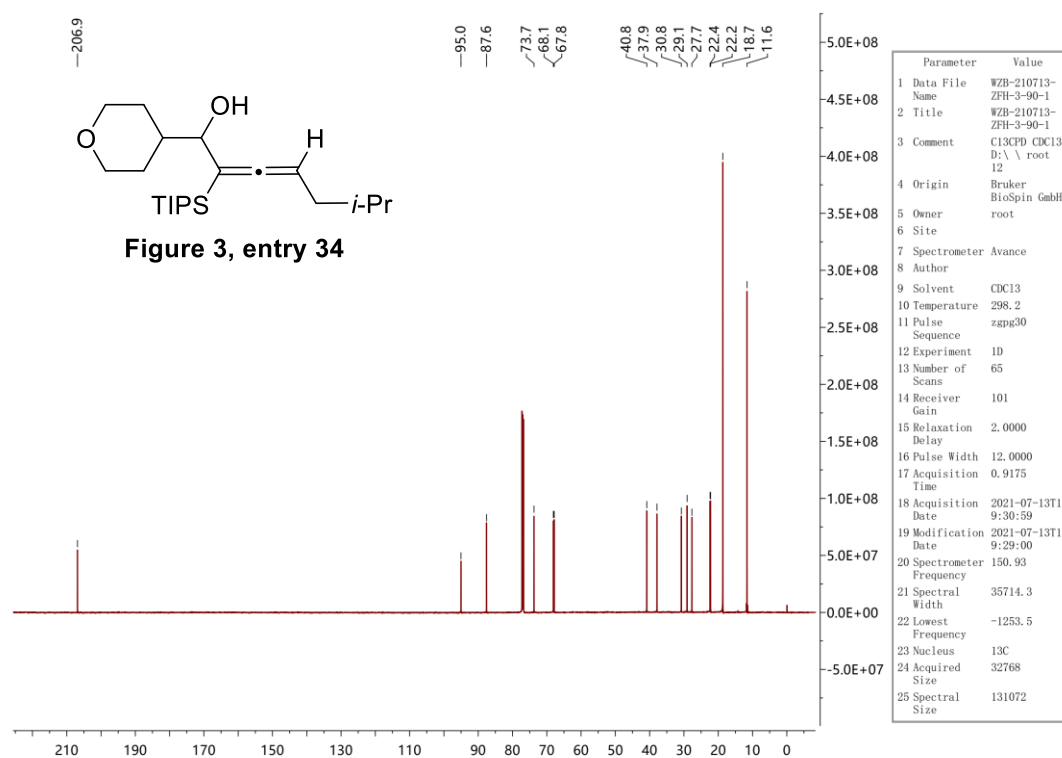

**Supplementary Figure 79.**  $^{13}\text{C}$  NMR spectrum of compound 34

<sup>1</sup>H NMR (500 MHz, room temperature, CDCl<sub>3</sub>)

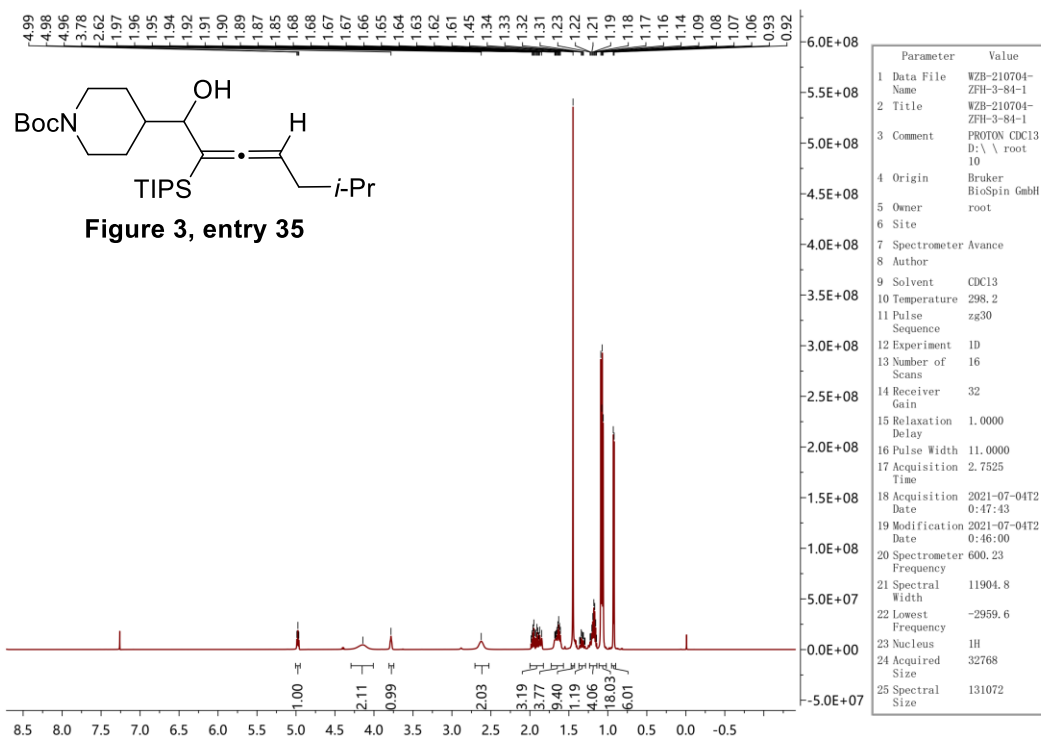

**Supplementary Figure 80.** <sup>1</sup>H NMR spectrum of compound 35

<sup>13</sup>C NMR (126 MHz, room temperature, CDCl<sub>3</sub>)

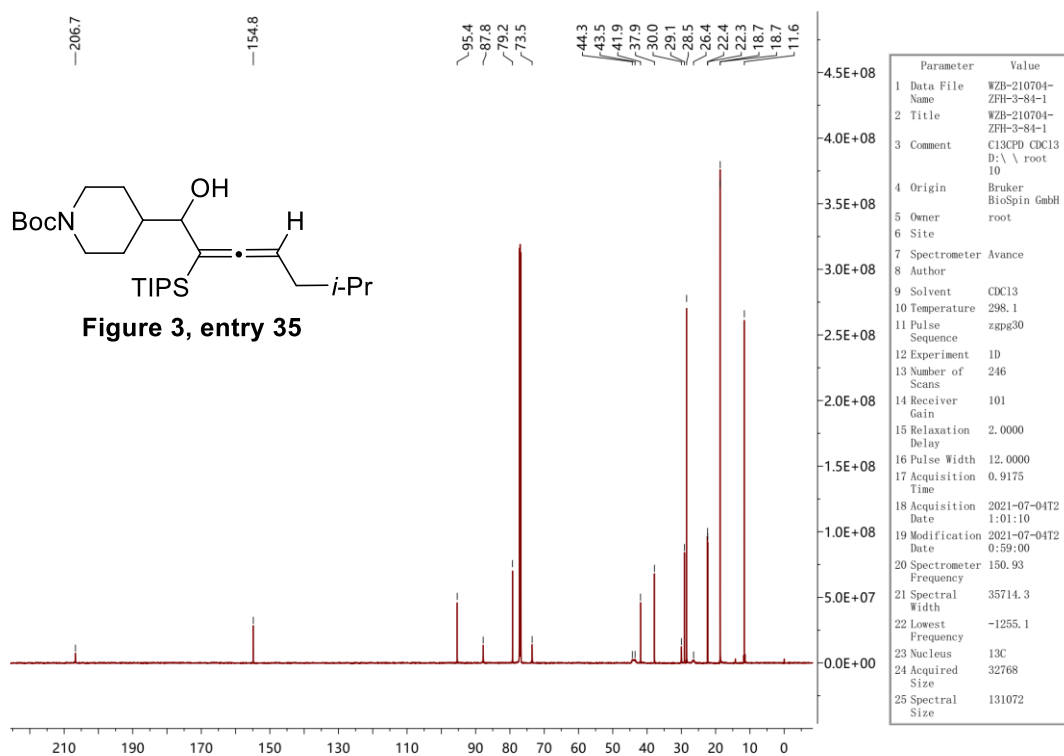

**Supplementary Figure 81.** <sup>13</sup>C NMR spectrum of compound 35

$^1\text{H}$  NMR (500 MHz, room temperature,  $\text{CDCl}_3$ )

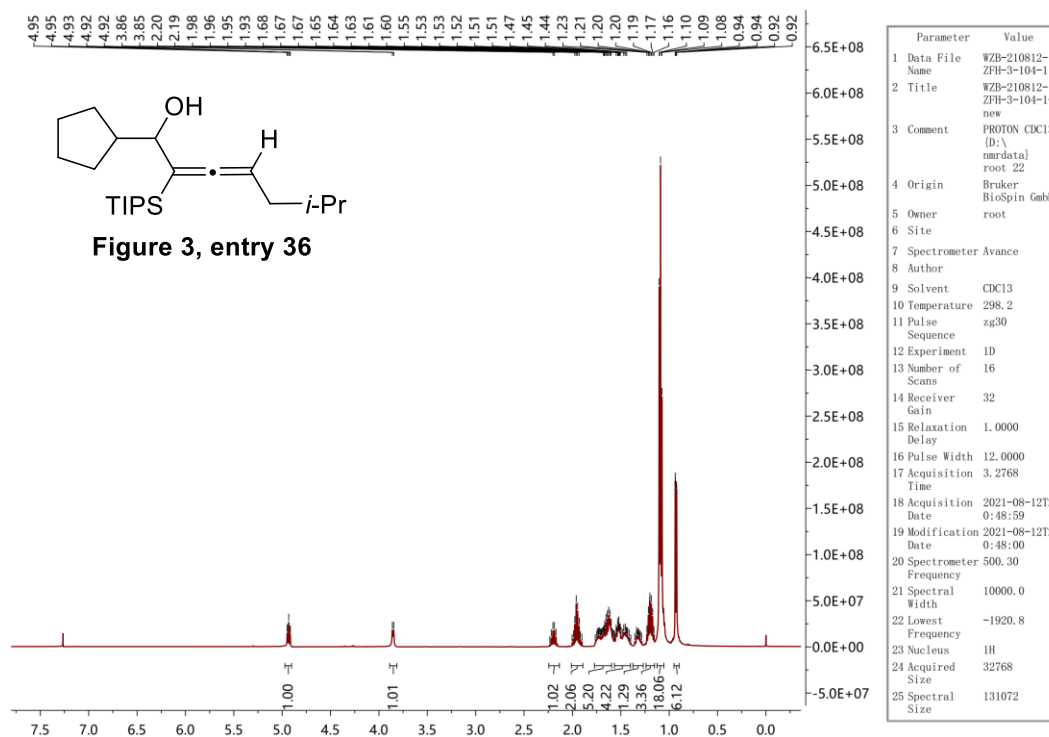

**Supplementary Figure 82.**  $^1\text{H}$  NMR spectrum of compound 36

$^{13}\text{C}$  NMR (126 MHz, room temperature,  $\text{CDCl}_3$ )

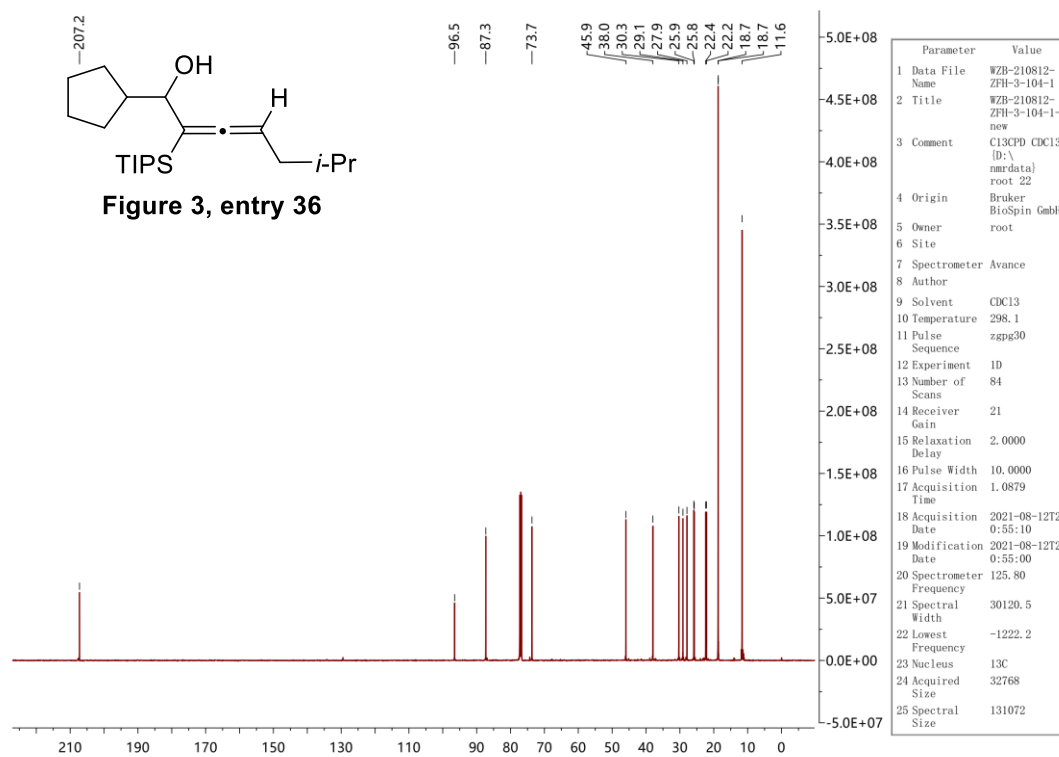

**Supplementary Figure 83.**  $^{13}\text{C}$  NMR spectrum of compound 36

<sup>1</sup>H NMR (500 MHz, room temperature, CDCl<sub>3</sub>)

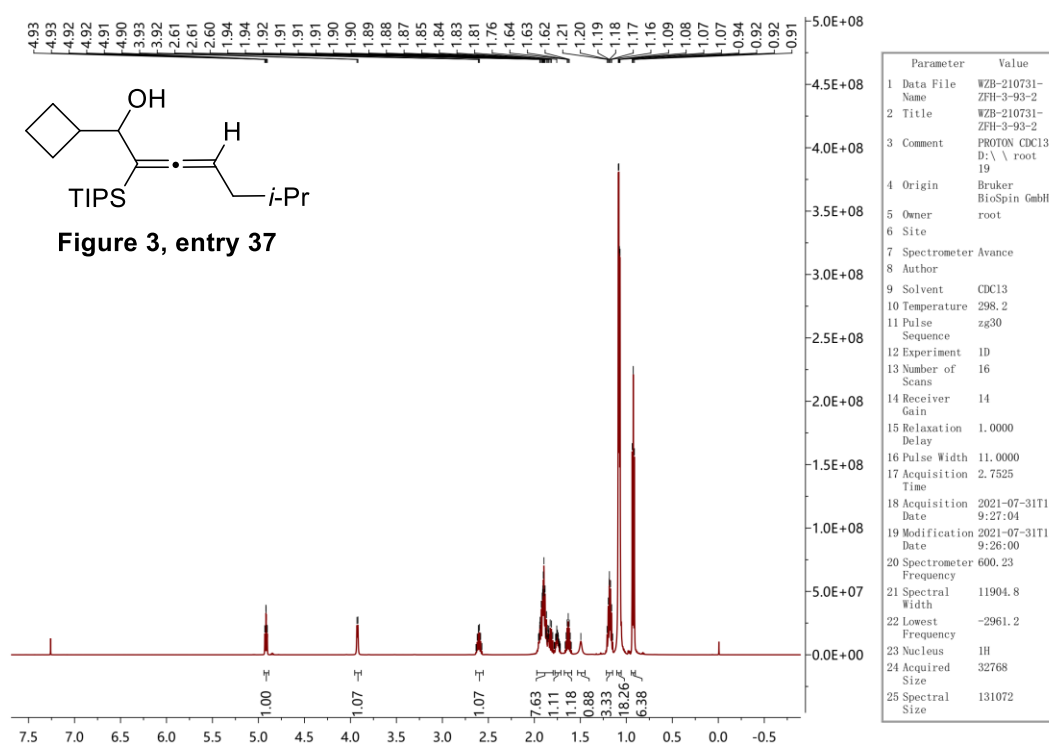

**Supplementary Figure 84.** <sup>1</sup>H NMR spectrum of compound 37

<sup>13</sup>C NMR (126 MHz, room temperature, CDCl<sub>3</sub>)

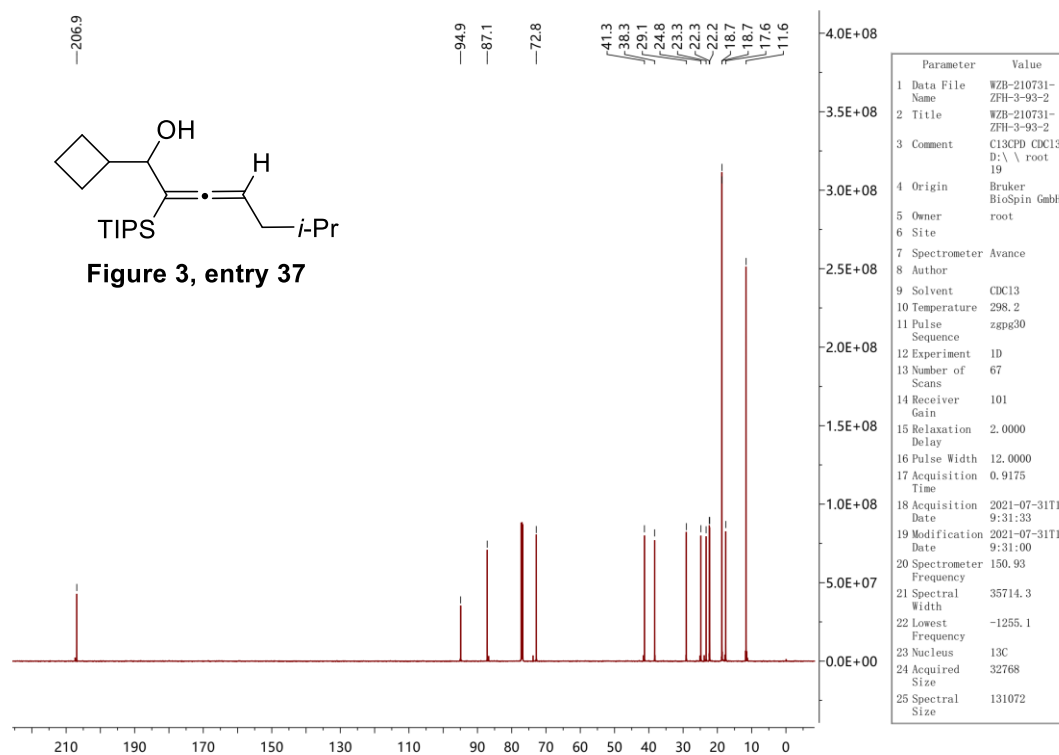

**Supplementary Figure 85.** <sup>13</sup>C NMR spectrum of compound 37

<sup>1</sup>H NMR (500 MHz, room temperature, CDCl<sub>3</sub>)

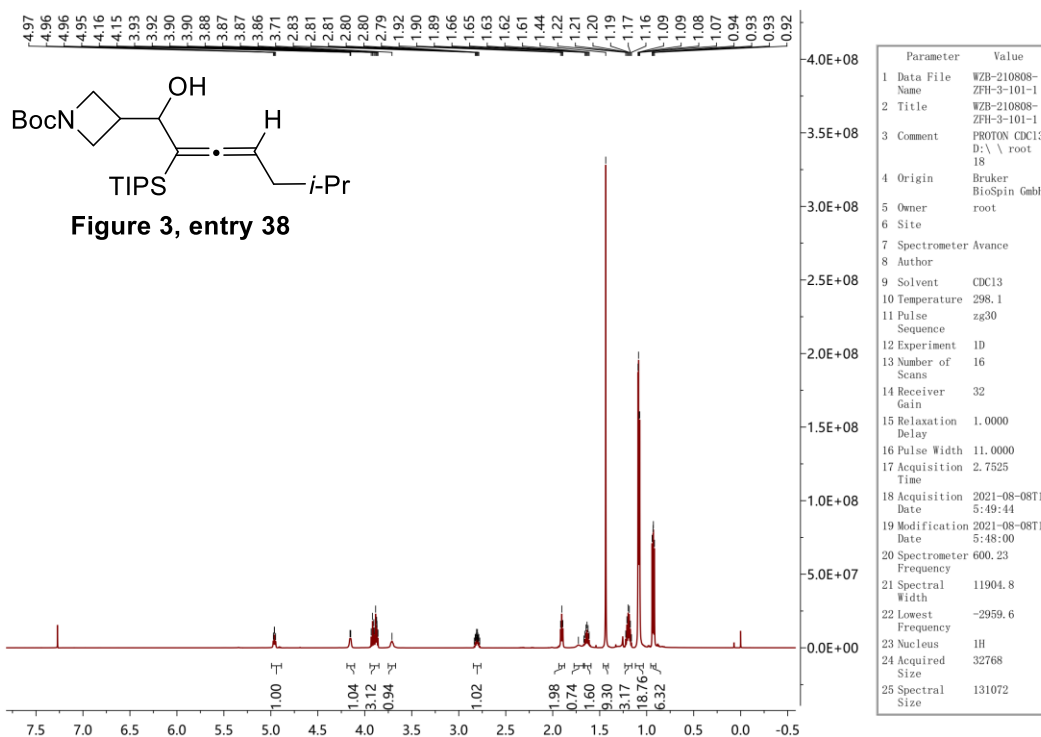

**Supplementary Figure 86.** <sup>1</sup>H NMR spectrum of compound 38

<sup>13</sup>C NMR (126 MHz, room temperature, CDCl<sub>3</sub>)

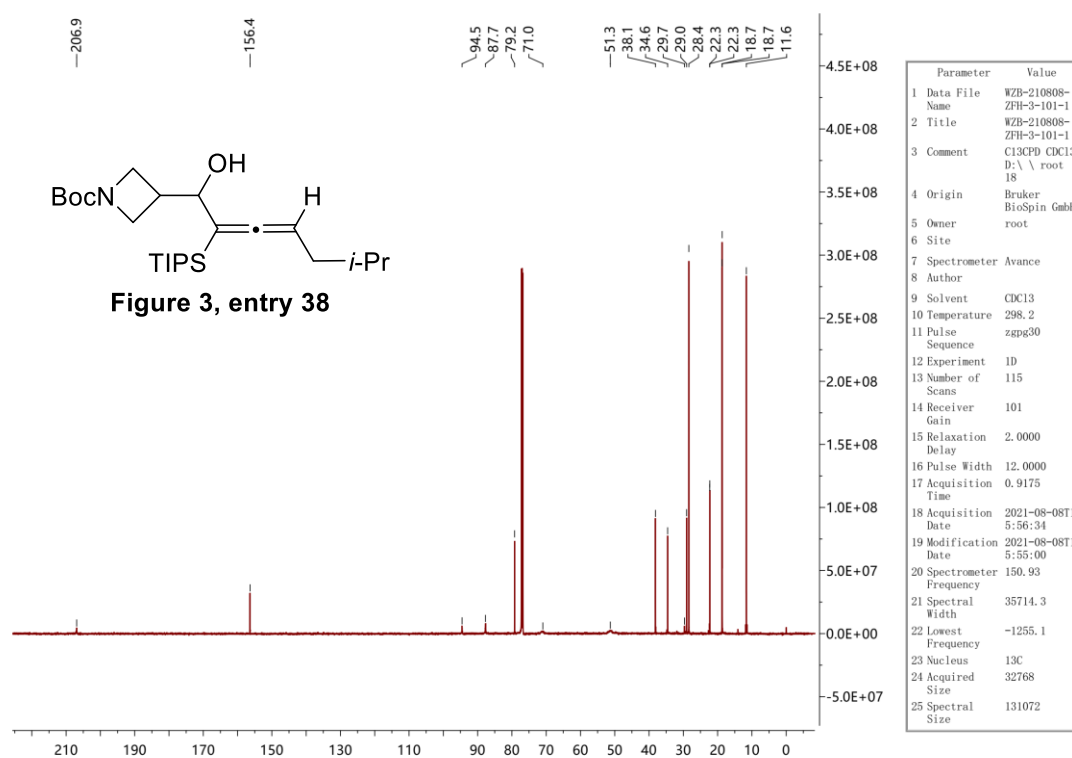

**Supplementary Figure 87.** <sup>13</sup>C NMR spectrum of compound 38

<sup>1</sup>H NMR (500 MHz, room temperature, CDCl<sub>3</sub>)

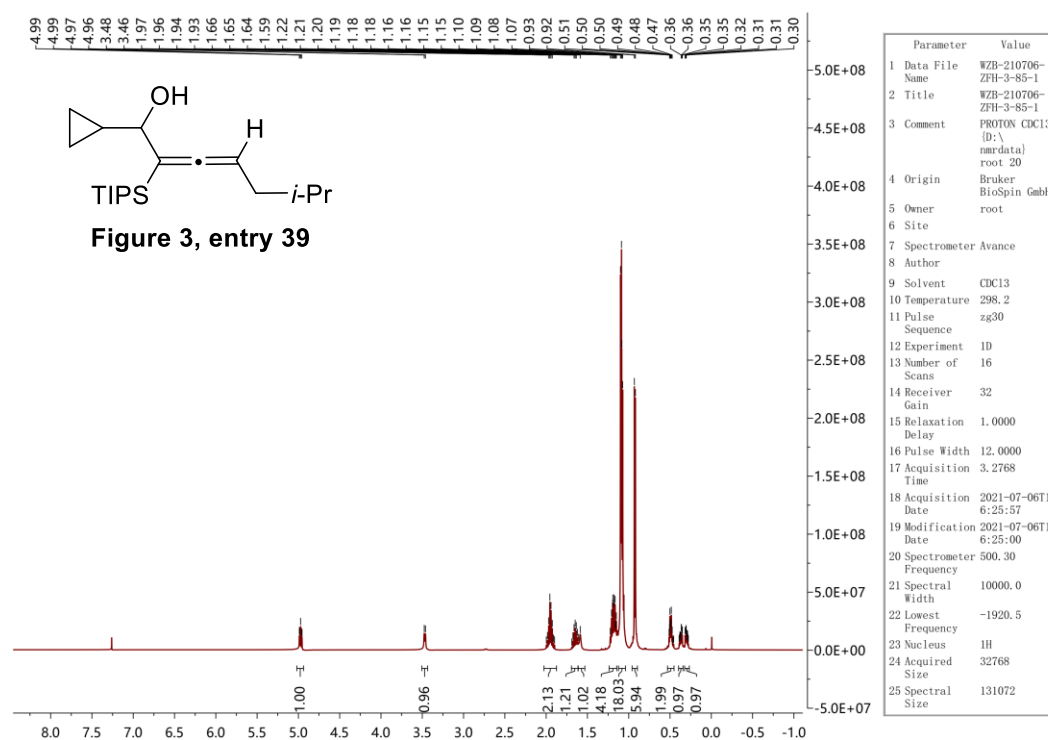

**Supplementary Figure 88.** <sup>1</sup>H NMR spectrum of compound 39

<sup>13</sup>C NMR (126 MHz, room temperature, CDCl<sub>3</sub>)

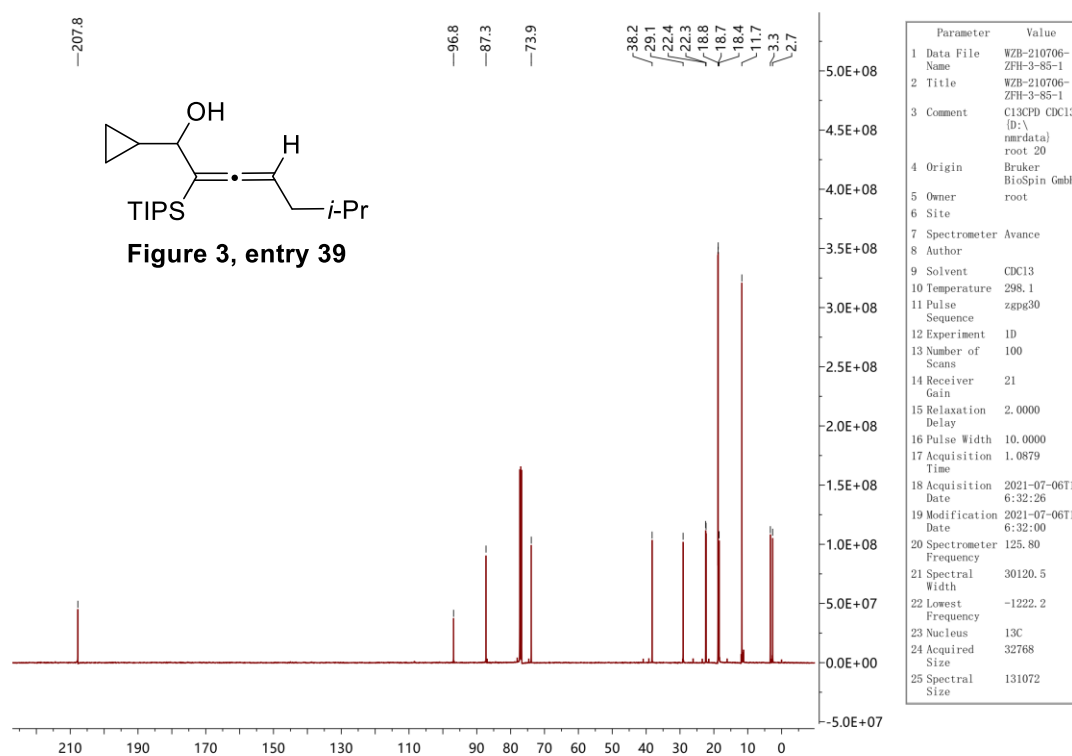

**Supplementary Figure 89.** <sup>13</sup>C NMR spectrum of compound 39

$^1\text{H}$  NMR (500 MHz, 60 °C,  $\text{C}_6\text{D}_6$ )

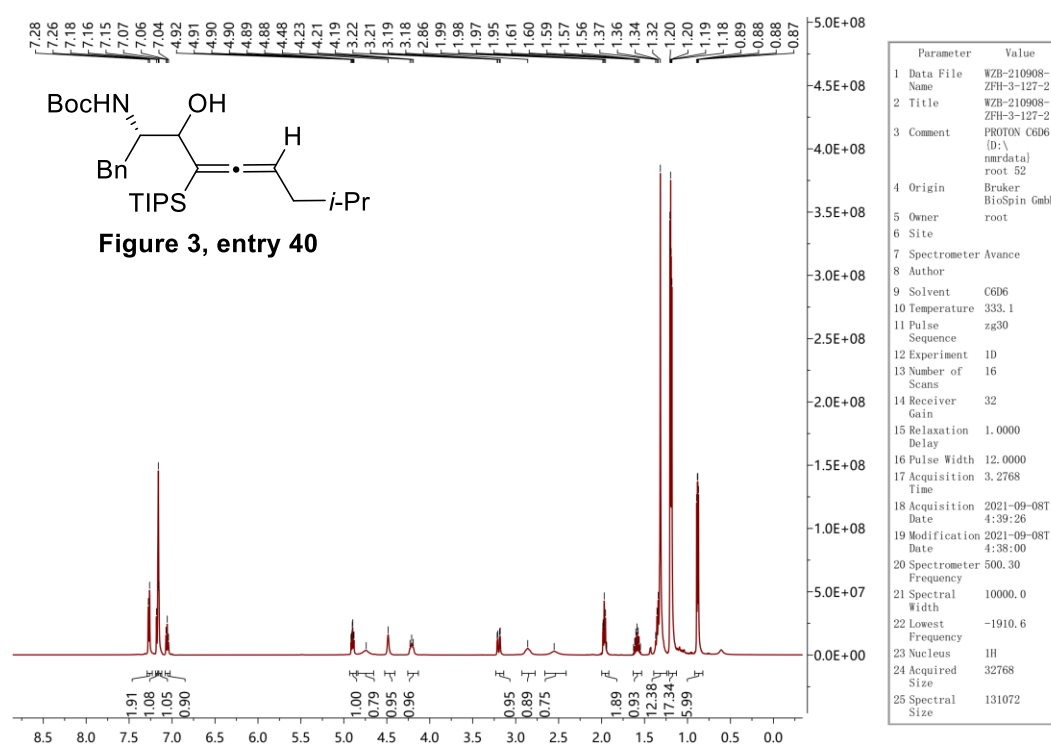

**Supplementary Figure 90.**  $^1\text{H}$  NMR spectrum of compound 40

$^{13}\text{C}$  NMR (126 MHz, 60 °C,  $\text{C}_6\text{D}_6$ )

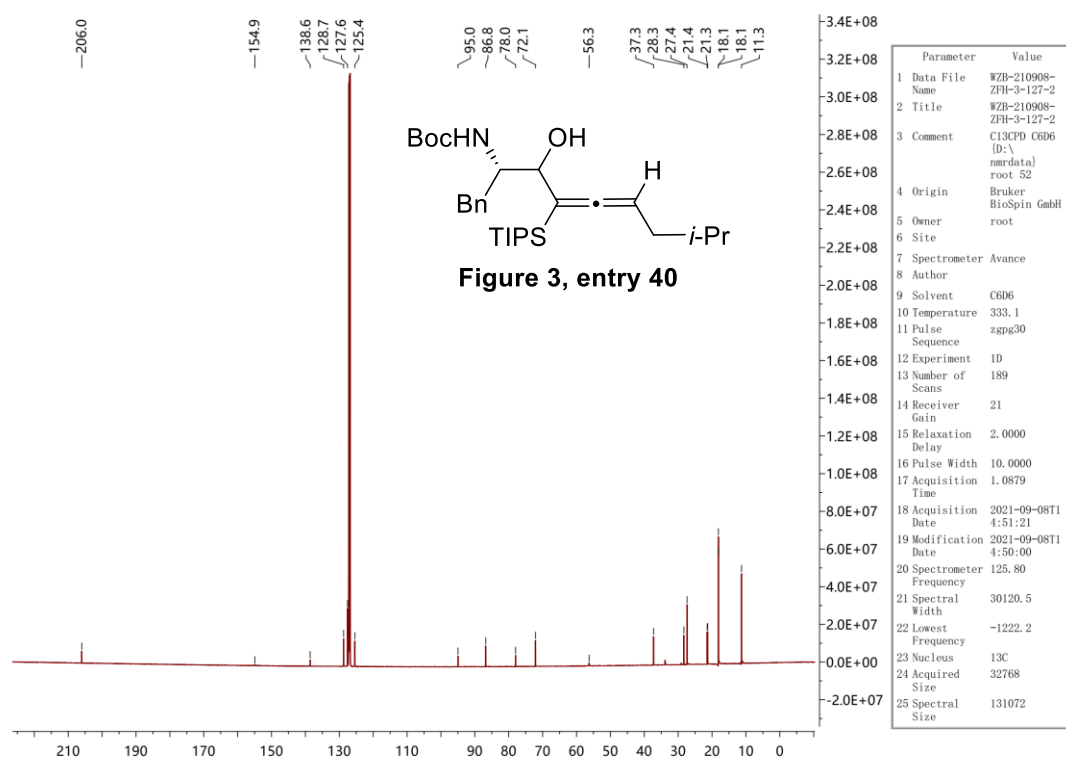

**Supplementary Figure 91.**  $^{13}\text{C}$  NMR spectrum of compound 40



$^1\text{H}$  NMR (500 MHz, 60 °C,  $\text{C}_6\text{D}_6$ )

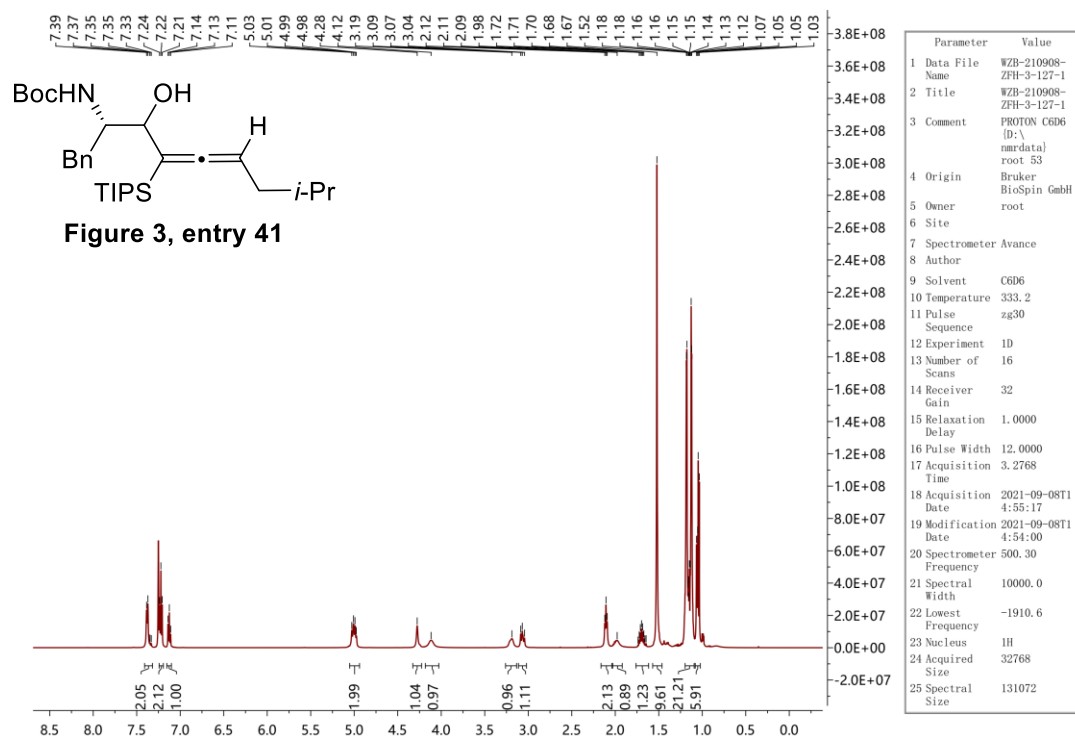

**Supplementary Figure 92.**  $^1\text{H}$  NMR spectrum of compound 41

$^{13}\text{C}$  NMR (126 MHz, 60 °C,  $\text{C}_6\text{D}_6$ )

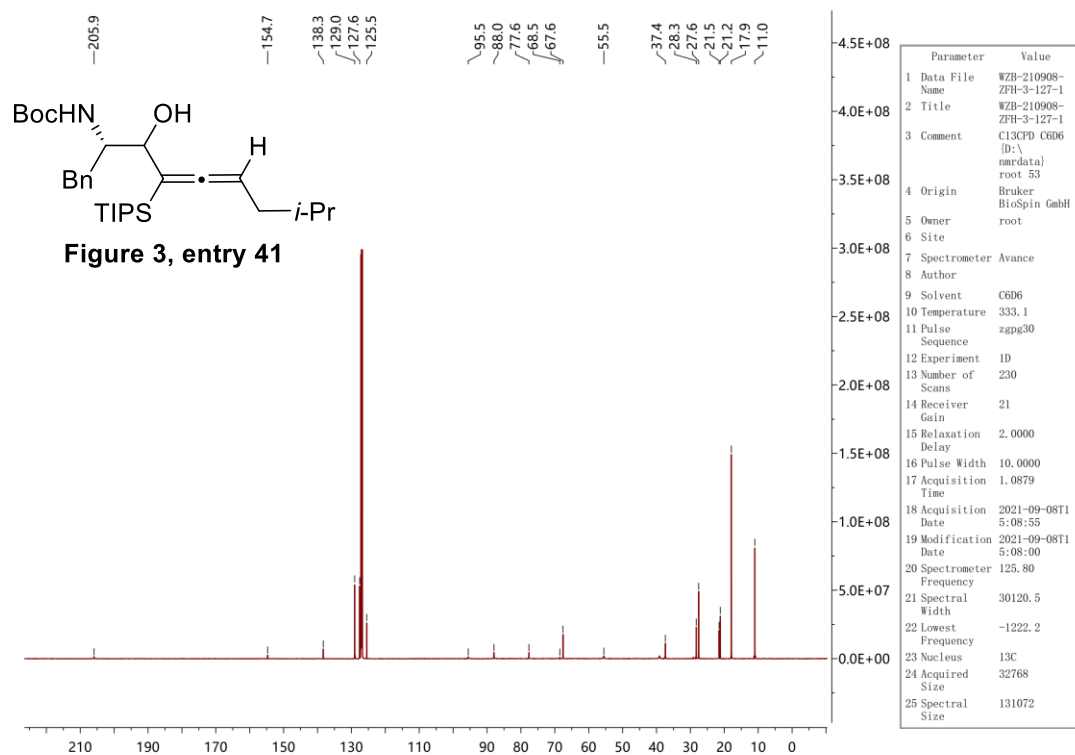

**Supplementary Figure 93.**  $^{13}\text{C}$  NMR spectrum of compound 41

<sup>1</sup>H NMR (500 MHz, 60 °C, C<sub>6</sub>D<sub>6</sub>)

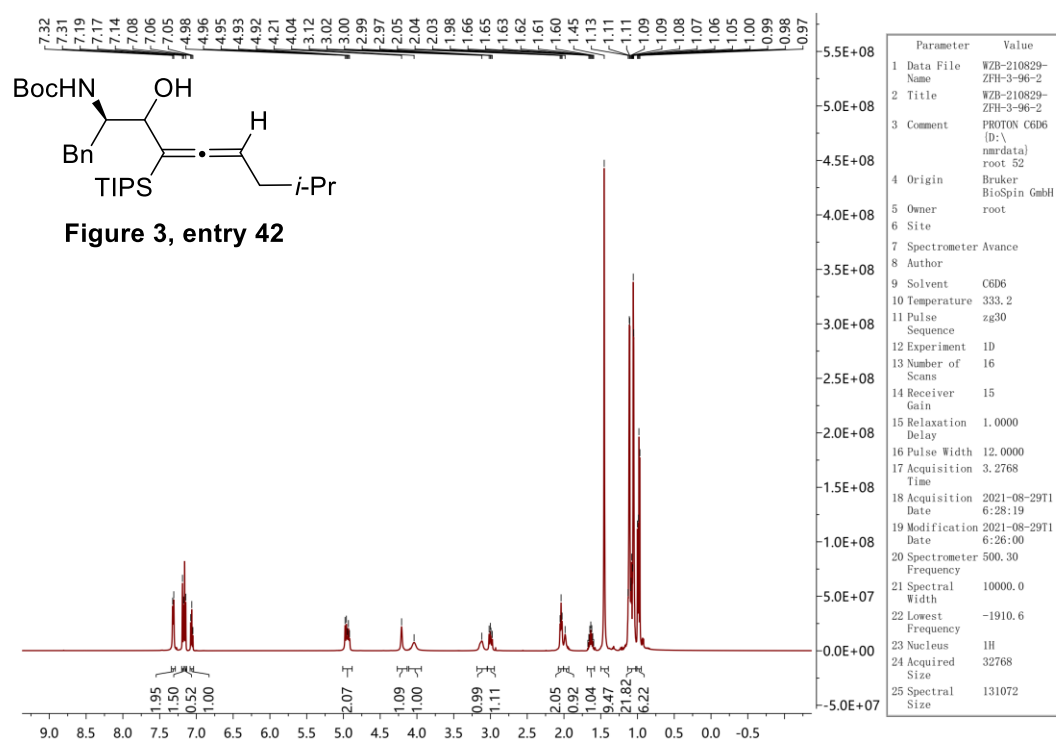

**Supplementary Figure 94.** <sup>1</sup>H NMR spectrum of compound **42**

<sup>13</sup>C NMR (126 MHz, 60 °C, C<sub>6</sub>D<sub>6</sub>)

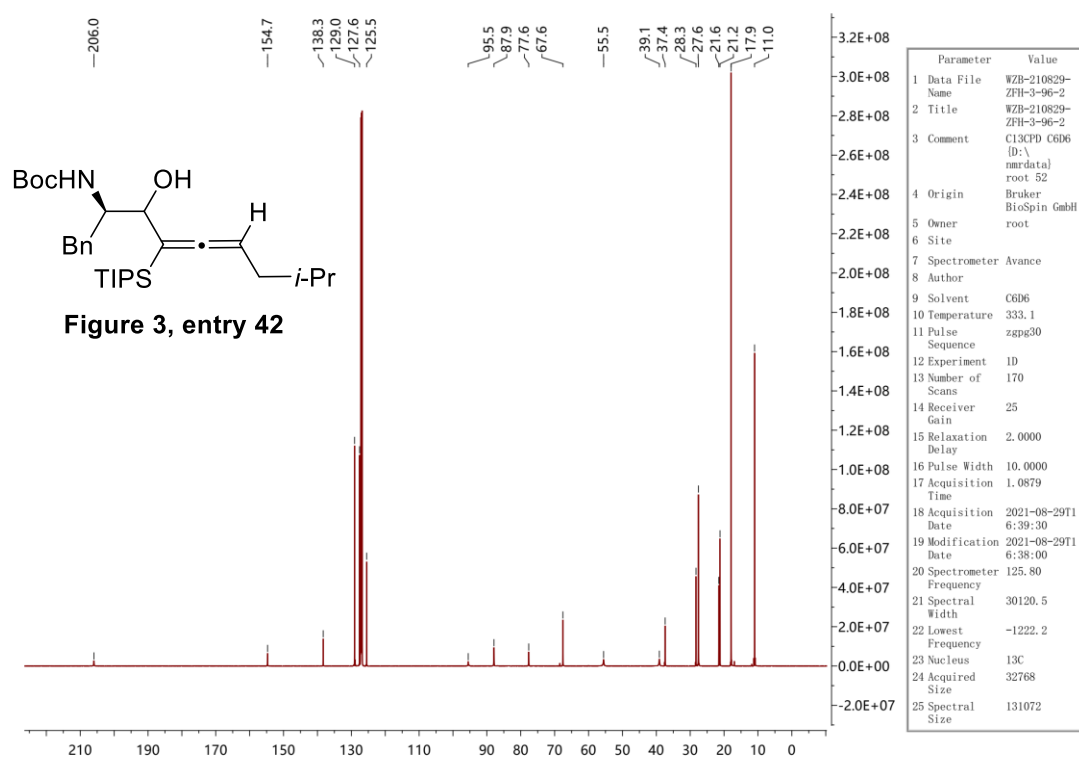

**Supplementary Figure 95** <sup>13</sup>C NMR spectrum of compound **42**

$^1\text{H}$  NMR (500 MHz, 60 °C,  $\text{C}_6\text{D}_6$ )

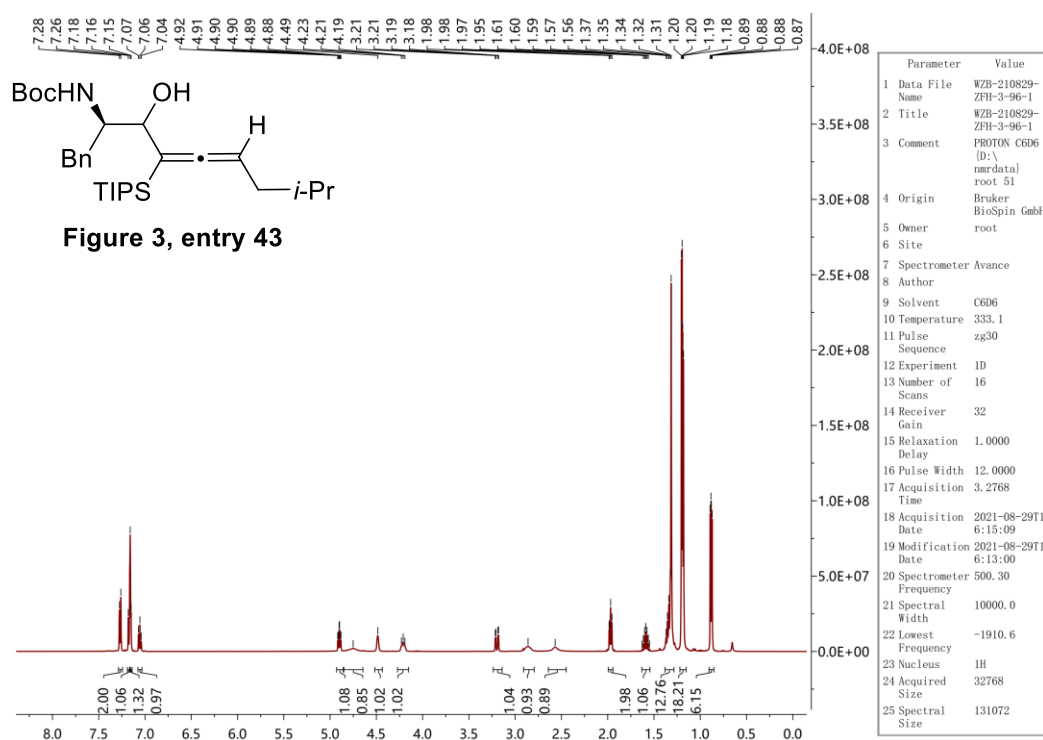

**Supplementary Figure 96.**  $^1\text{H}$  NMR spectrum of compound 43

$^{13}\text{C}$  NMR (126 MHz, 60 °C,  $\text{C}_6\text{D}_6$ )

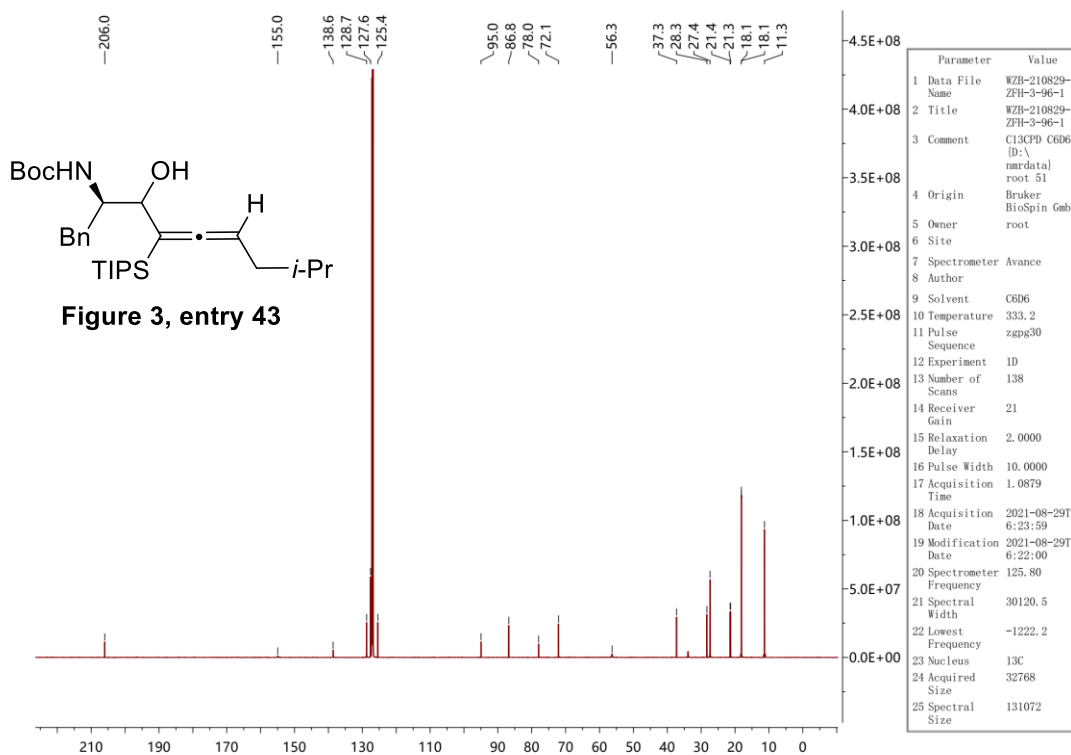

**Supplementary Figure 97.**  $^{13}\text{C}$  NMR spectrum of compound 43

$^1\text{H}$  NMR (500 MHz, 60 °C,  $\text{C}_6\text{D}_6$ )

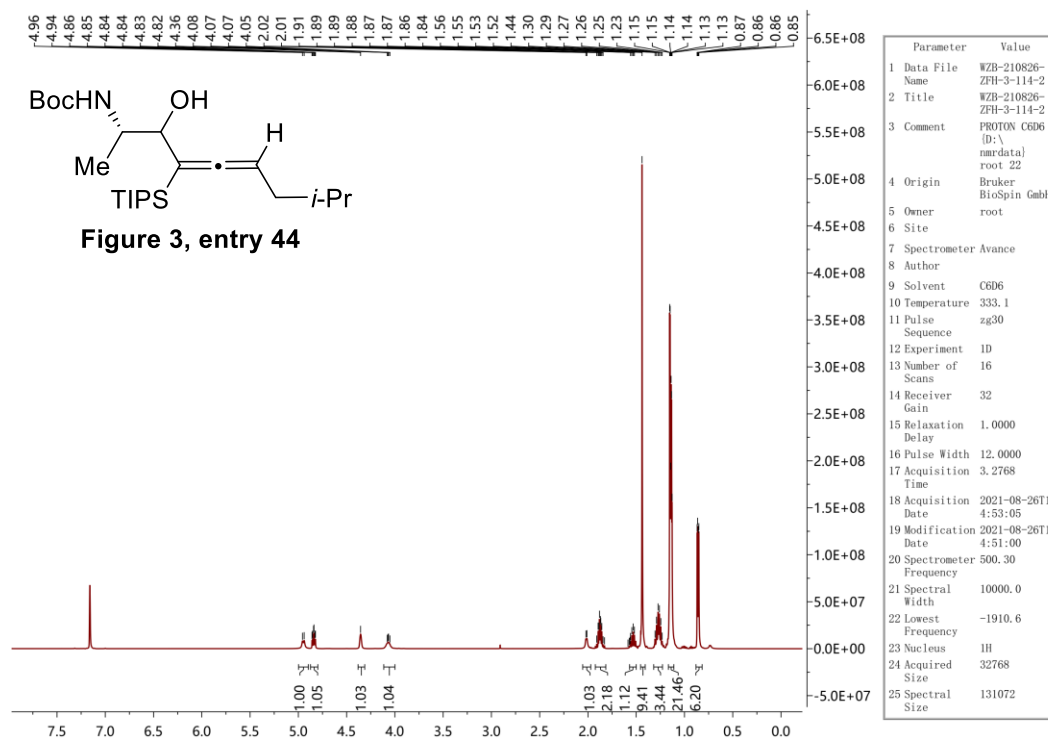

**Supplementary Figure 98.**  $^1\text{H}$  NMR spectrum of compound 44

$^{13}\text{C}$  NMR (126 MHz, 60 °C,  $\text{C}_6\text{D}_6$ )

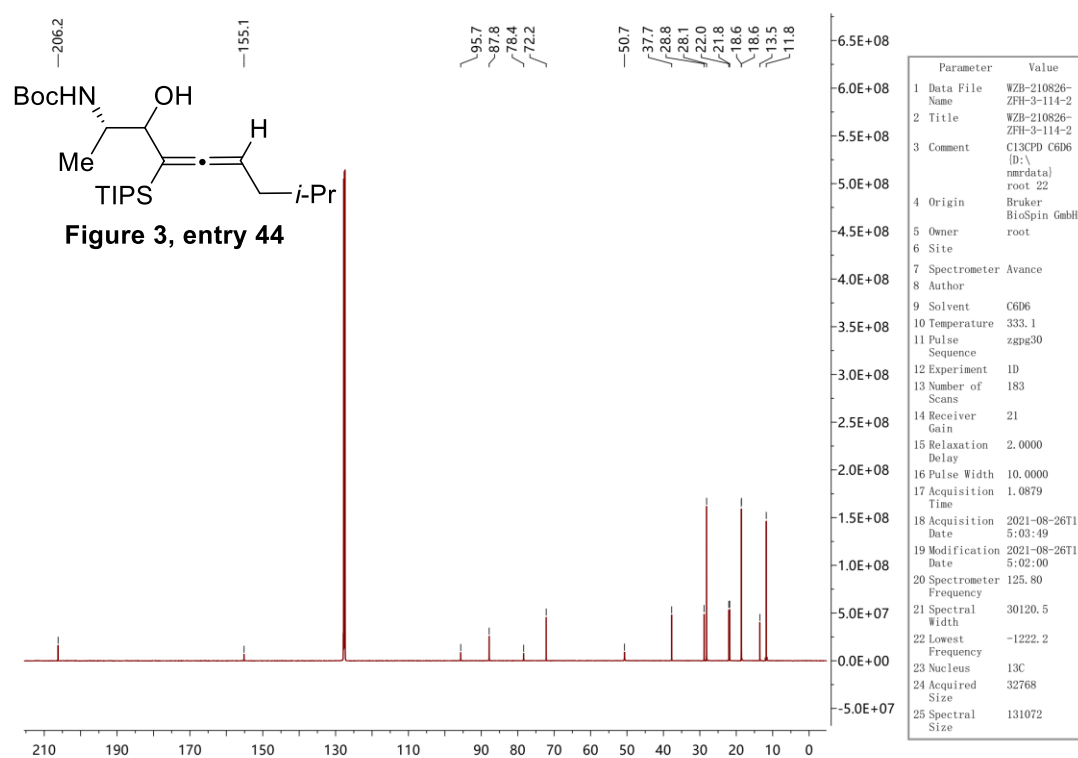

**Supplementary Figure 99.**  $^{13}\text{C}$  NMR spectrum of compound 44

$^1\text{H}$  NMR (500 MHz, 60 °C,  $\text{C}_6\text{D}_6$ )

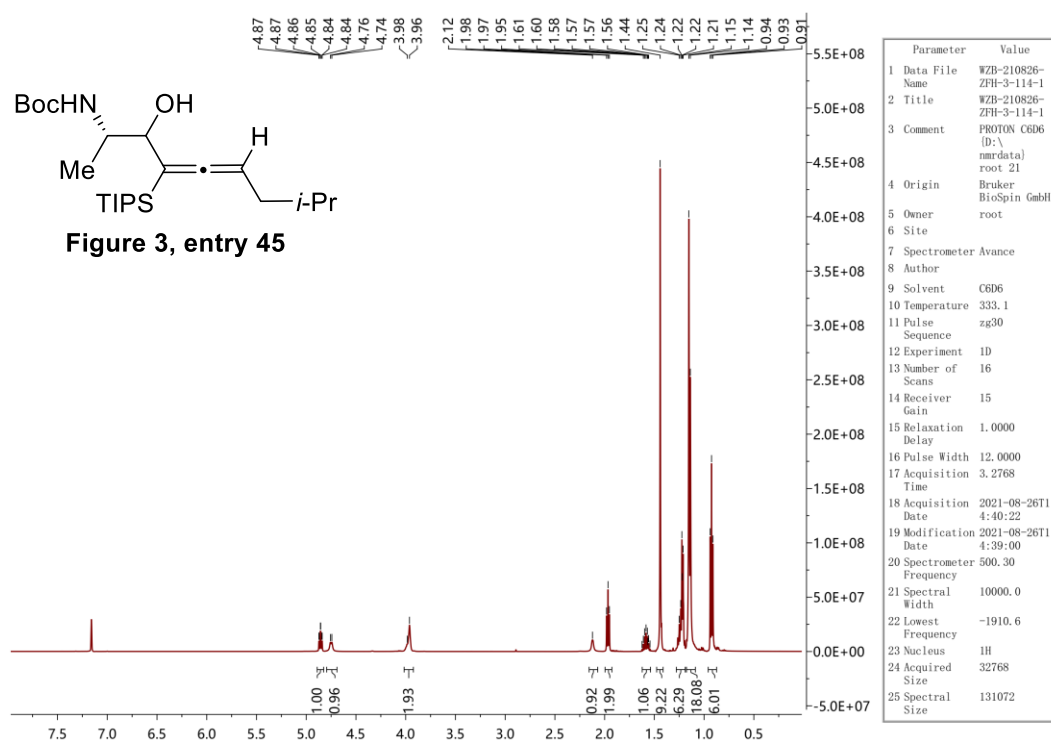

**Supplementary Figure 100.**  $^1\text{H}$  NMR spectrum of compound 45

$^{13}\text{C}$  NMR (126 MHz, 60 °C,  $\text{C}_6\text{D}_6$ )

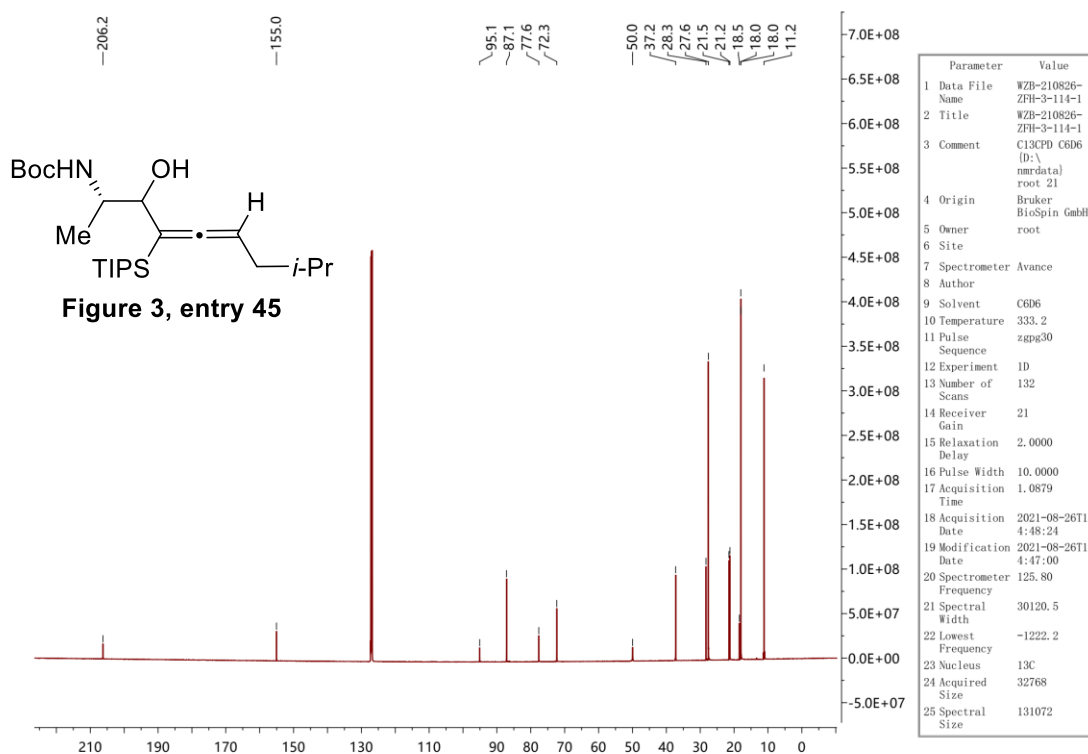

**Supplementary Figure 101.**  $^{13}\text{C}$  NMR spectrum of compound 45

$^1\text{H}$  NMR (500 MHz, 60 °C,  $\text{C}_6\text{D}_6$ )

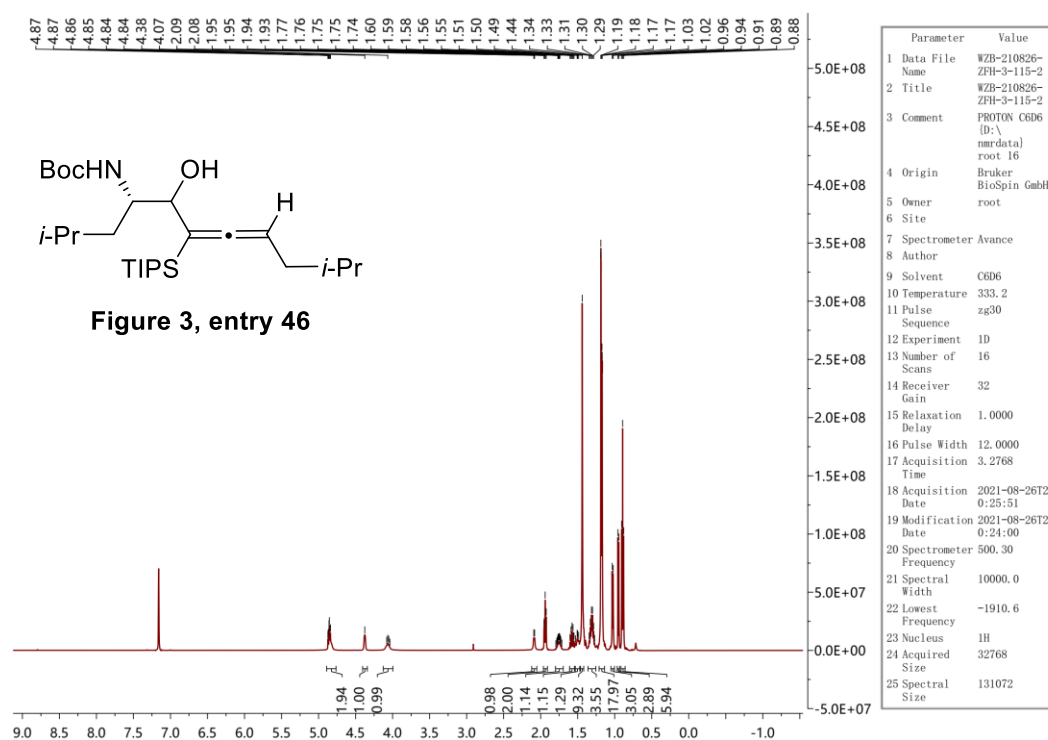

**Supplementary Figure 102.**  $^1\text{H}$  NMR spectrum of compound 46

$^{13}\text{C}$  NMR (126 MHz, 60 °C,  $\text{C}_6\text{D}_6$ )

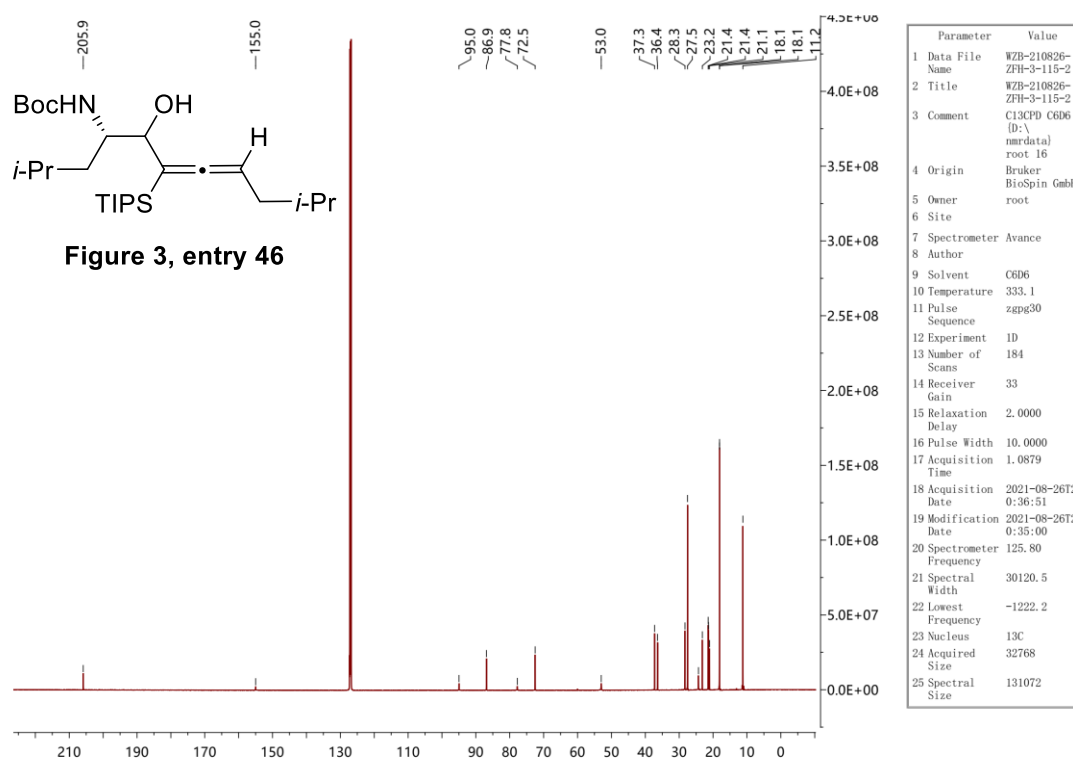

**Supplementary Figure 103.**  $^{13}\text{C}$  NMR spectrum of compound 46

$^1\text{H}$  NMR (500 MHz, 60 °C,  $\text{C}_6\text{D}_6$ )

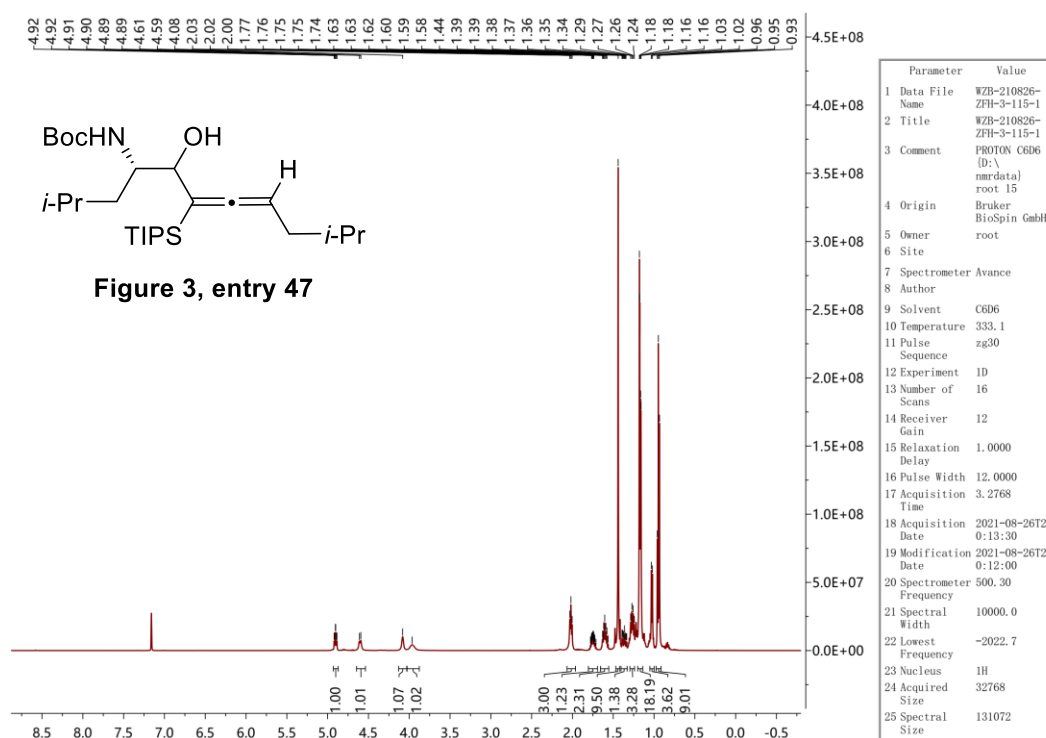

**Supplementary Figure 104.**  $^1\text{H}$  NMR spectrum of compound 47

$^{13}\text{C}$  NMR (126 MHz, 60 °C,  $\text{C}_6\text{D}_6$ )

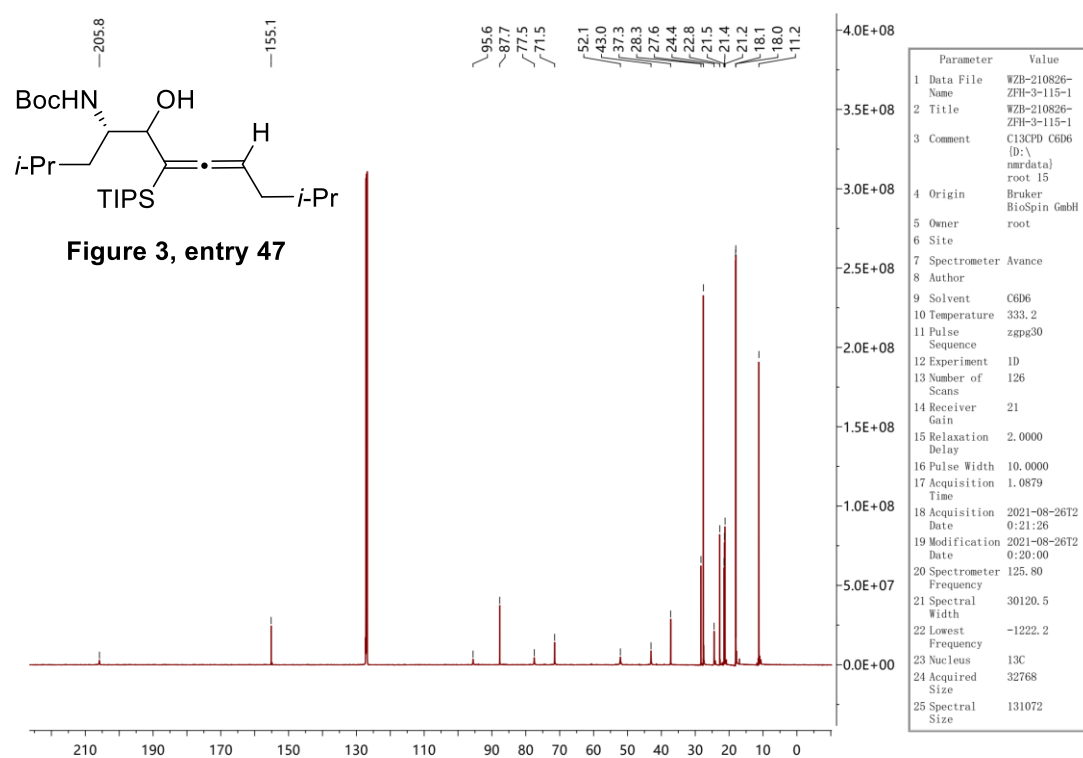

**Supplementary Figure 105.**  $^{13}\text{C}$  NMR spectrum of compound 47

$^1\text{H}$  NMR (500 MHz, 60 °C,  $\text{C}_6\text{D}_6$ )

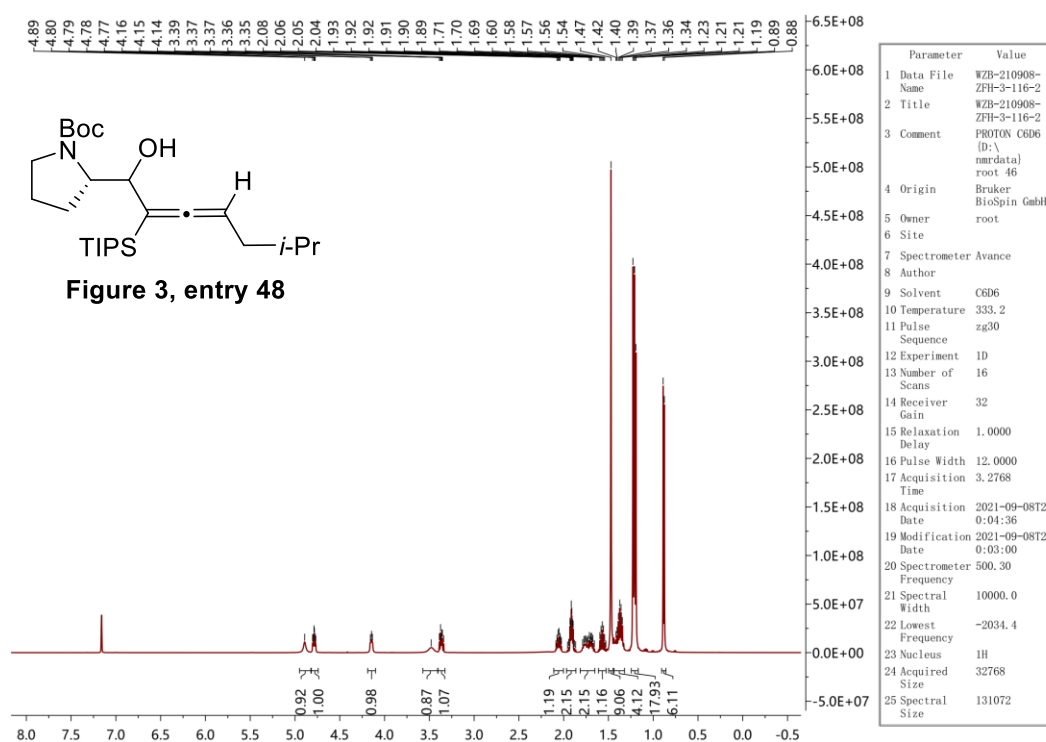

**Supplementary Figure 106.**  $^1\text{H}$  NMR spectrum of compound 48

$^{13}\text{C}$  NMR (126 MHz, 60 °C,  $\text{C}_6\text{D}_6$ )

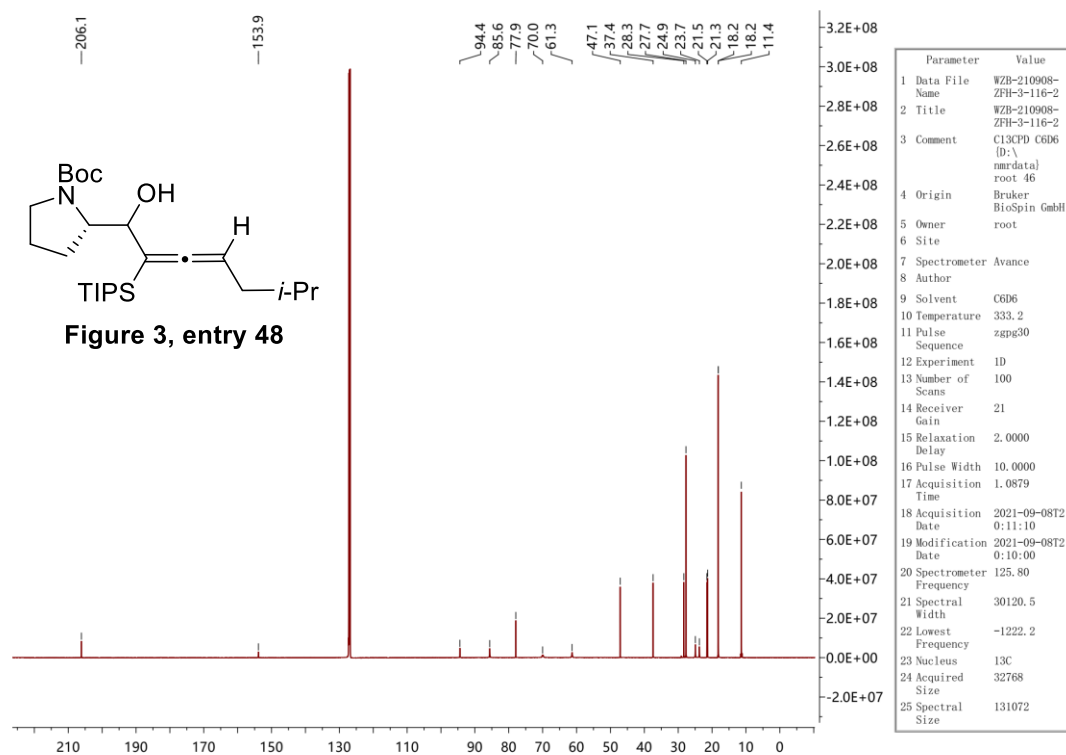

**Supplementary Figure 107.**  $^{13}\text{C}$  NMR spectrum of compound 48



$^1\text{H}$  NMR (500 MHz, 60 °C,  $\text{C}_6\text{D}_6$ )

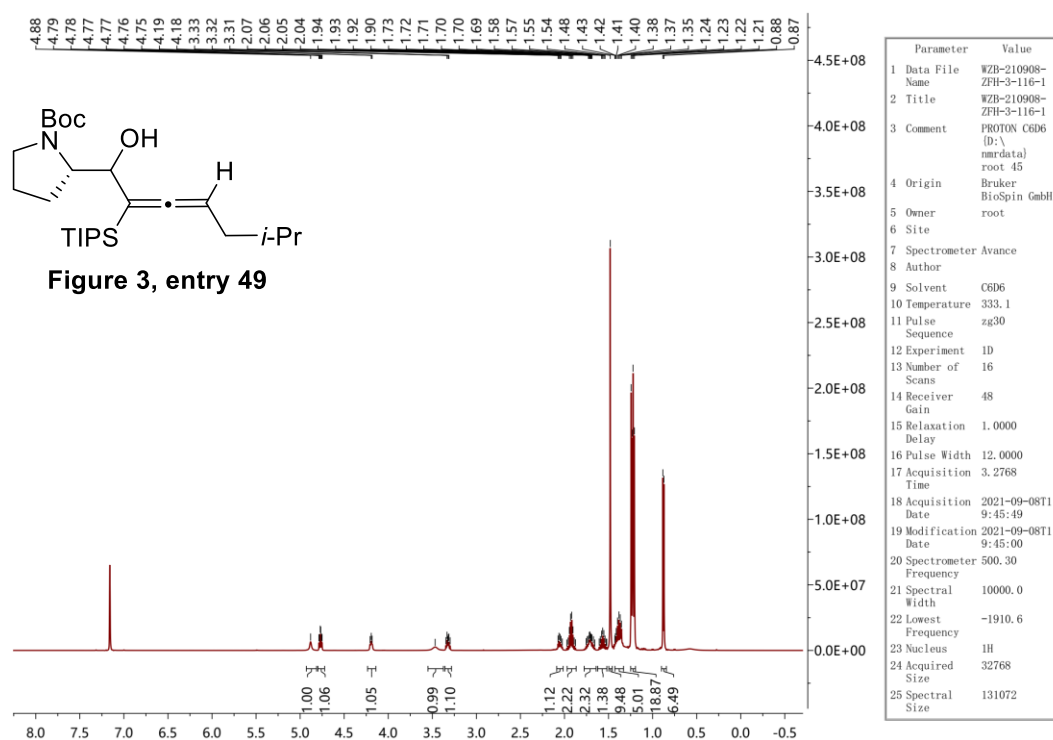

Supplementary Figure 108.  $^1\text{H}$  NMR spectrum of compound 49

$^{13}\text{C}$  NMR (126 MHz, 60 °C,  $\text{C}_6\text{D}_6$ )

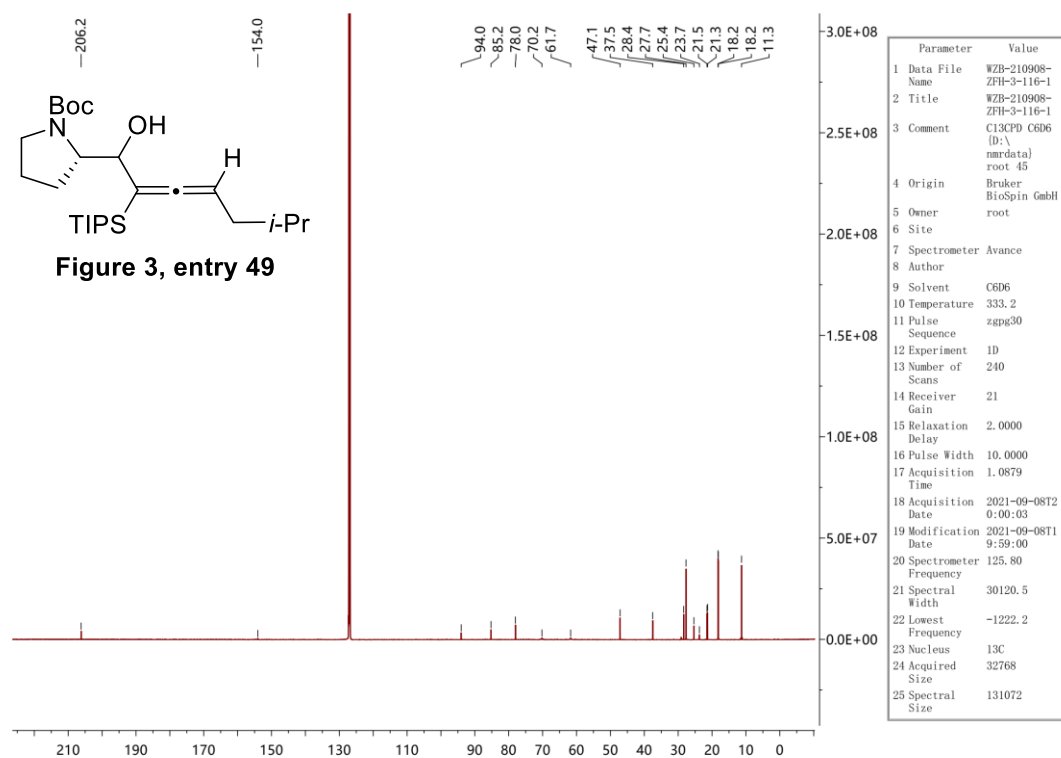

Supplementary Figure 109.  $^{13}\text{C}$  NMR spectrum of compound 49

<sup>1</sup>H NMR (500 MHz, room temperature, CDCl<sub>3</sub>)

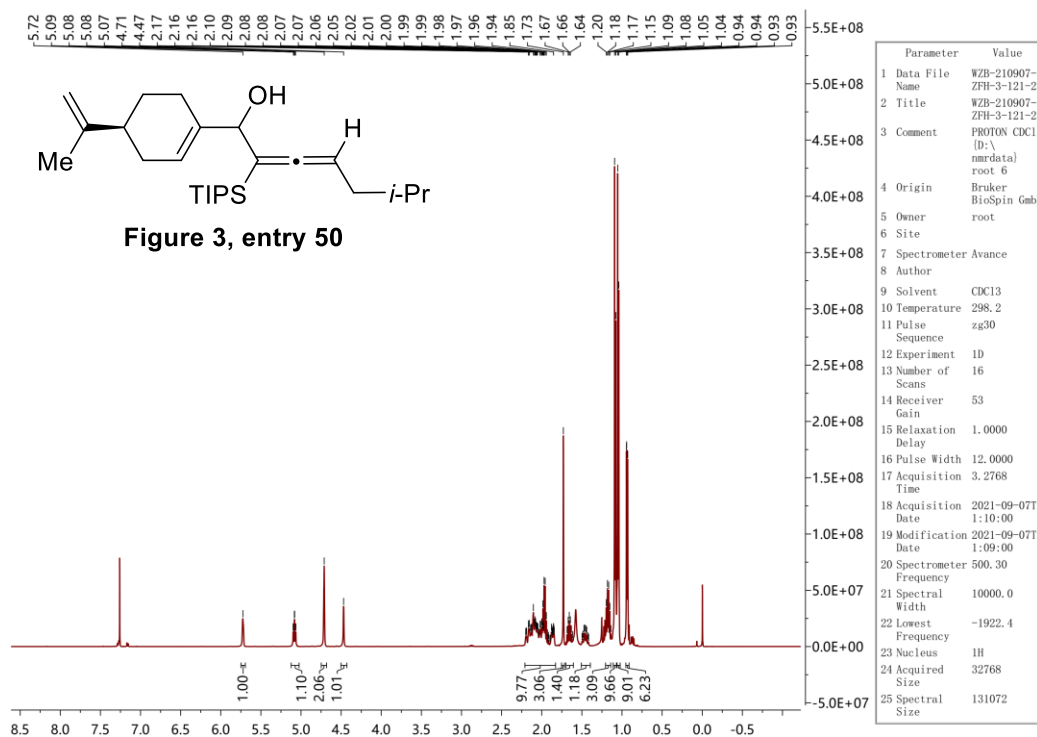

**Supplementary Figure 110.** <sup>1</sup>H NMR spectrum of compound 50

<sup>13</sup>C NMR (126 MHz, room temperature, CDCl<sub>3</sub>)

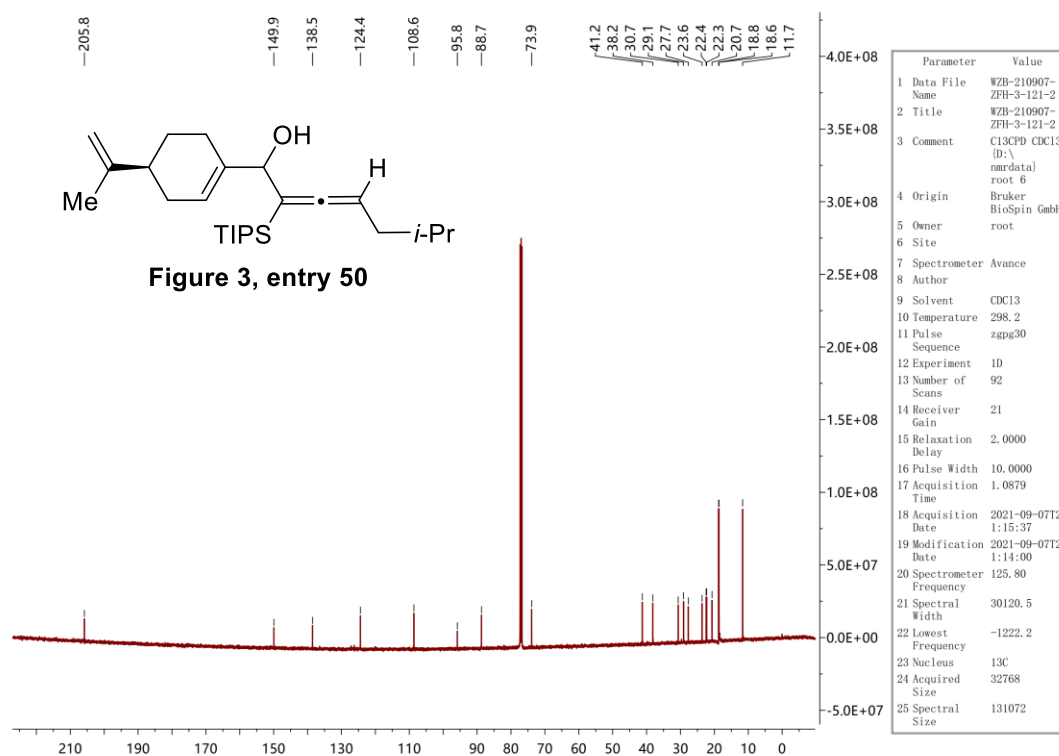

**Supplementary Figure 111.** <sup>13</sup>C NMR spectrum of compound 50

<sup>1</sup>H NMR (500 MHz, room temperature, CDCl<sub>3</sub>)

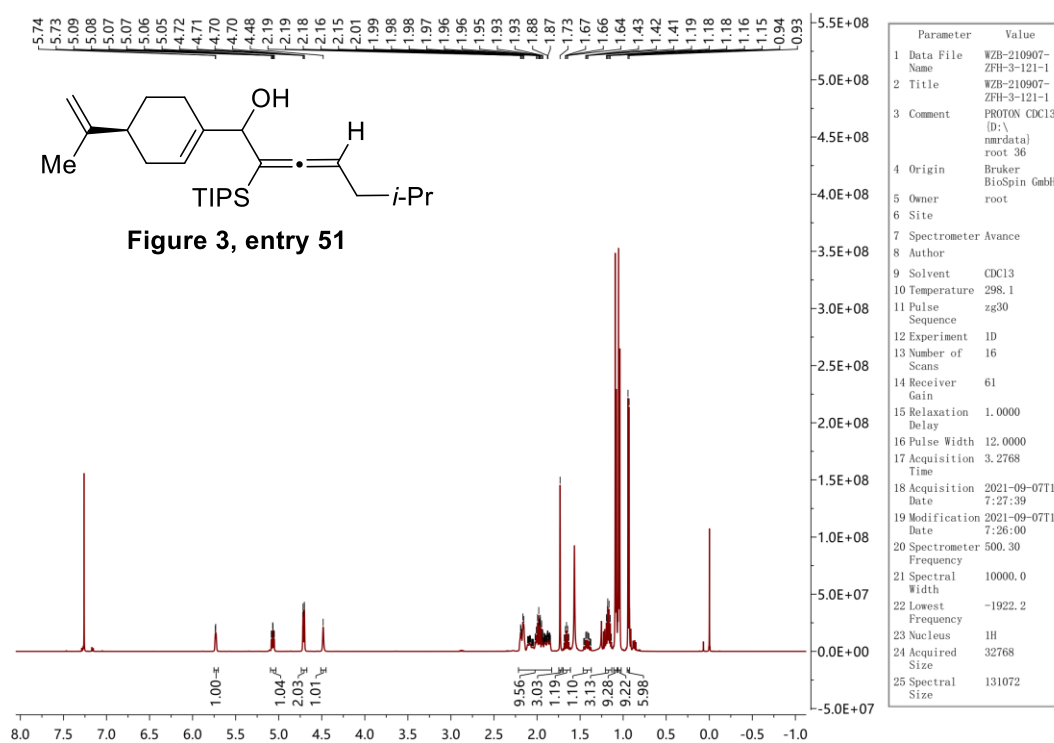

**Supplementary Figure 112.** <sup>1</sup>H NMR spectrum of compound 51

<sup>13</sup>C NMR (126 MHz, room temperature, CDCl<sub>3</sub>)

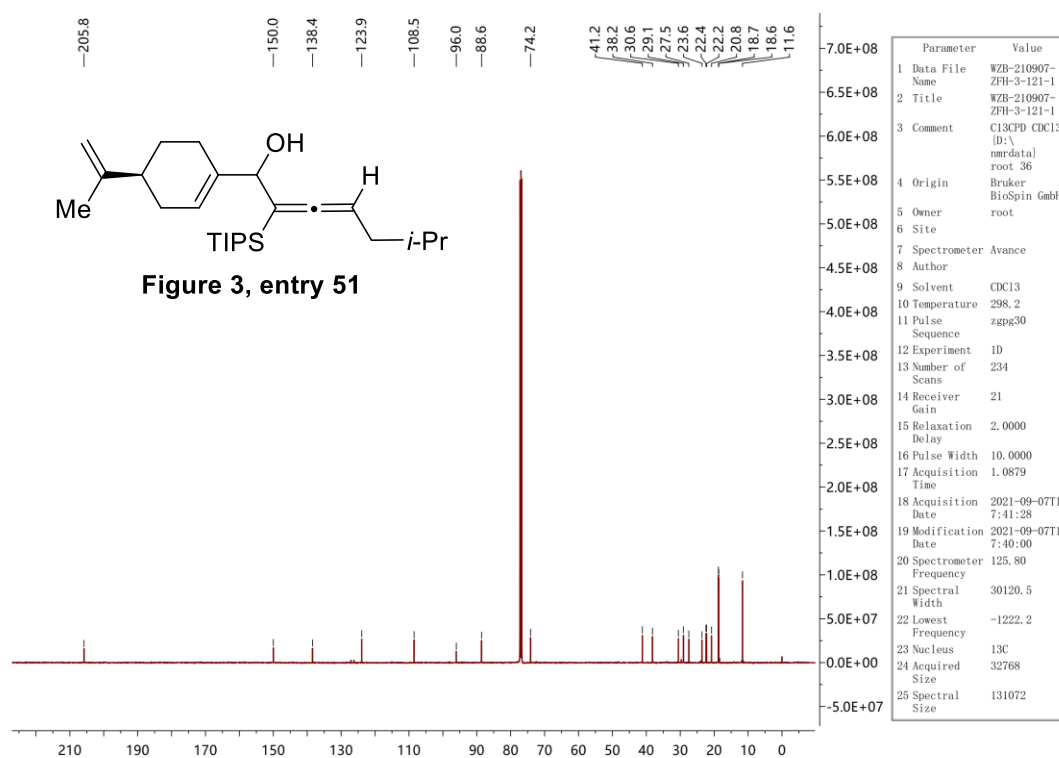

**Supplementary Figure 113.** <sup>13</sup>C NMR spectrum of compound 51

<sup>1</sup>H NMR (500 MHz, room temperature, CDCl<sub>3</sub>)

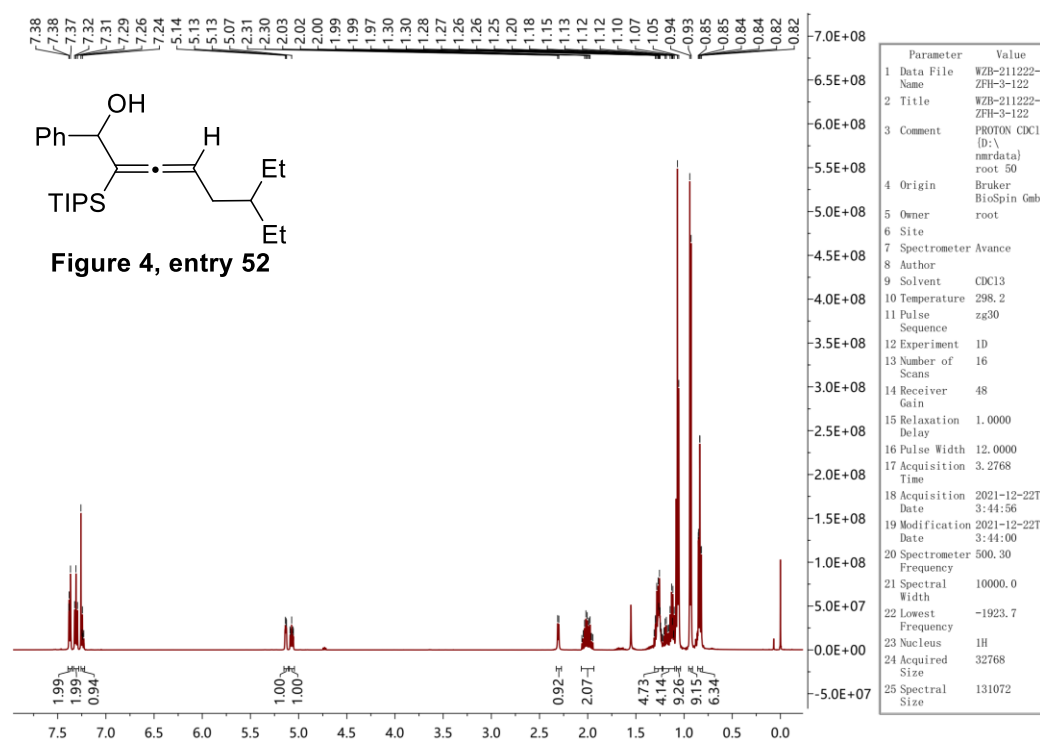

**Supplementary Figure 114.** <sup>1</sup>H NMR spectrum of compound 52

<sup>13</sup>C NMR (126 MHz, room temperature, CDCl<sub>3</sub>)

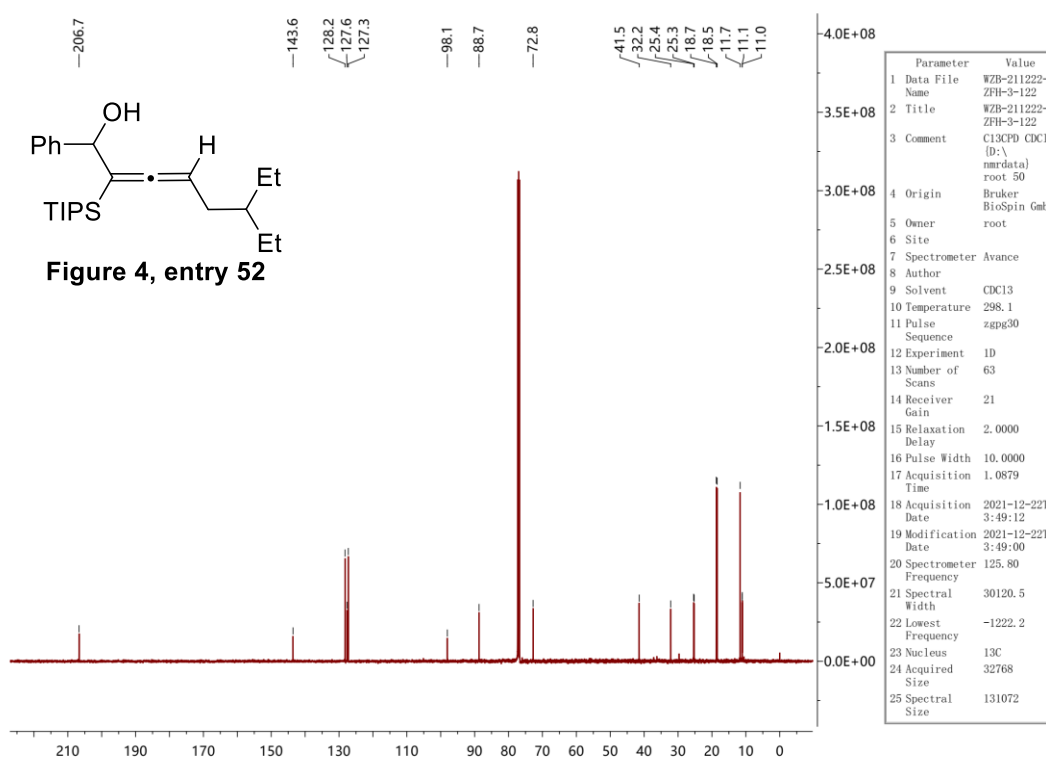

**Supplementary Figure 115.** <sup>13</sup>C NMR spectrum of compound 52

<sup>1</sup>H NMR (500 MHz, room temperature, CDCl<sub>3</sub>)

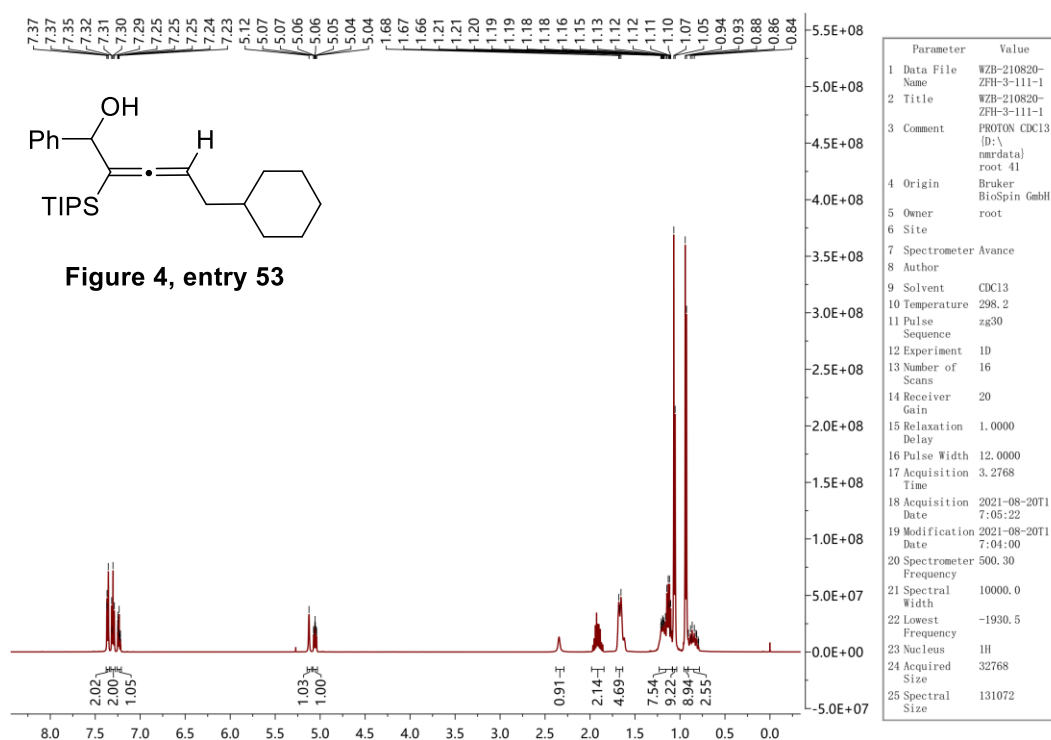

**Supplementary Figure 116.** <sup>1</sup>H NMR spectrum of compound 53

<sup>13</sup>C NMR (126 MHz, room temperature, CDCl<sub>3</sub>)

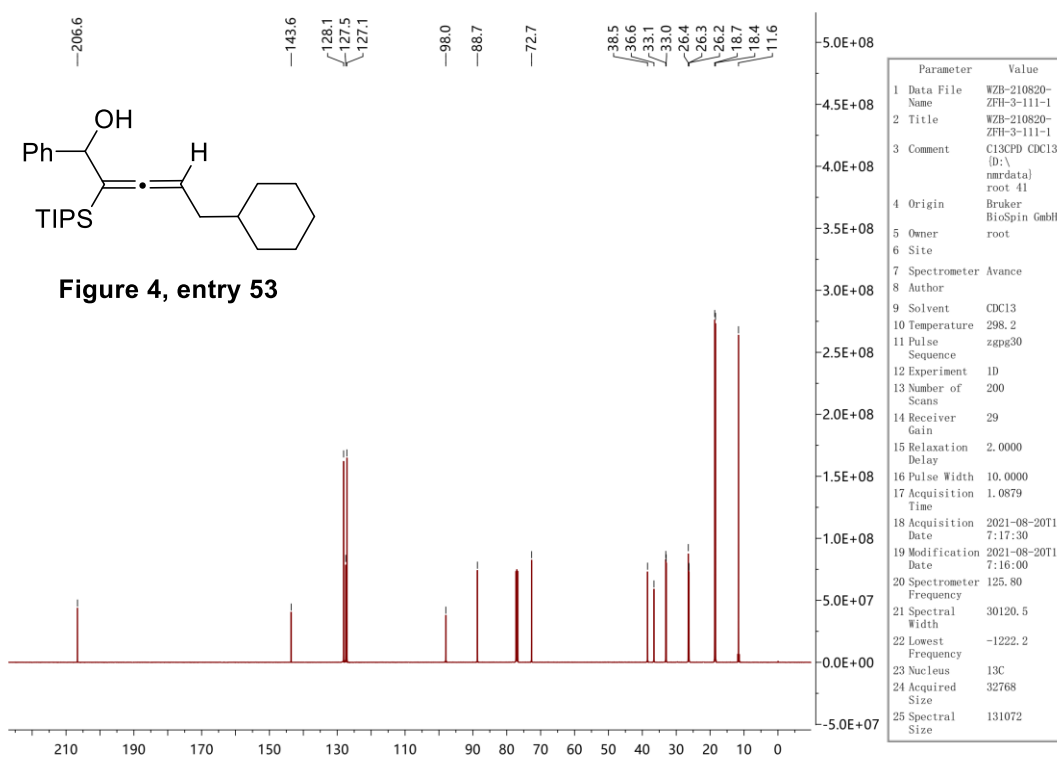

**Supplementary Figure 117.** <sup>13</sup>C NMR spectrum of compound 53

<sup>1</sup>H NMR (500 MHz, room temperature, CDCl<sub>3</sub>)

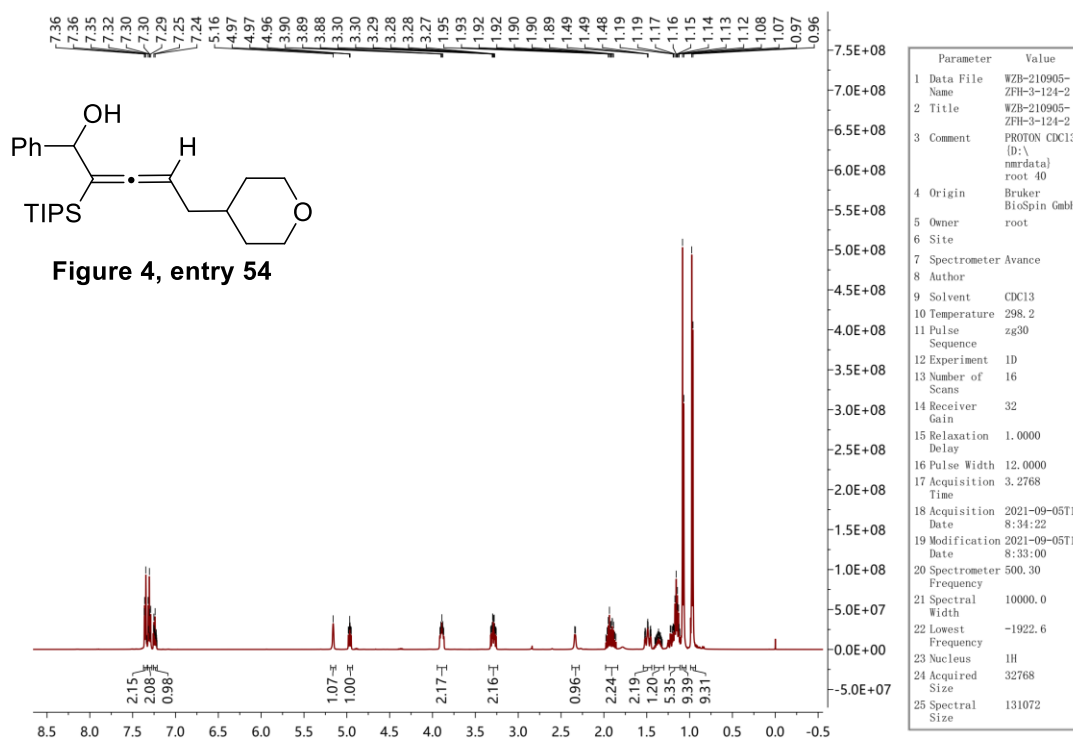

**Supplementary Figure 118.** <sup>1</sup>H NMR spectrum of compound 54

<sup>13</sup>C NMR (126 MHz, room temperature, CDCl<sub>3</sub>)

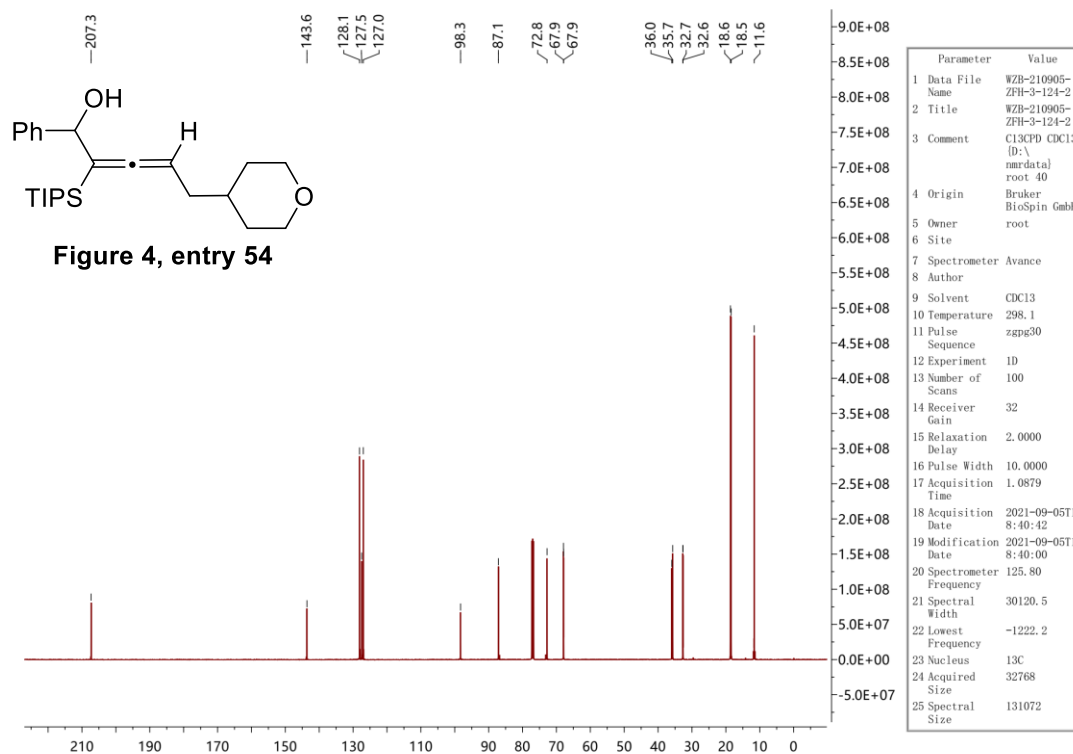

**Supplementary Figure 119.** <sup>13</sup>C NMR spectrum of compound 54

<sup>1</sup>H NMR (500 MHz, room temperature, CDCl<sub>3</sub>)

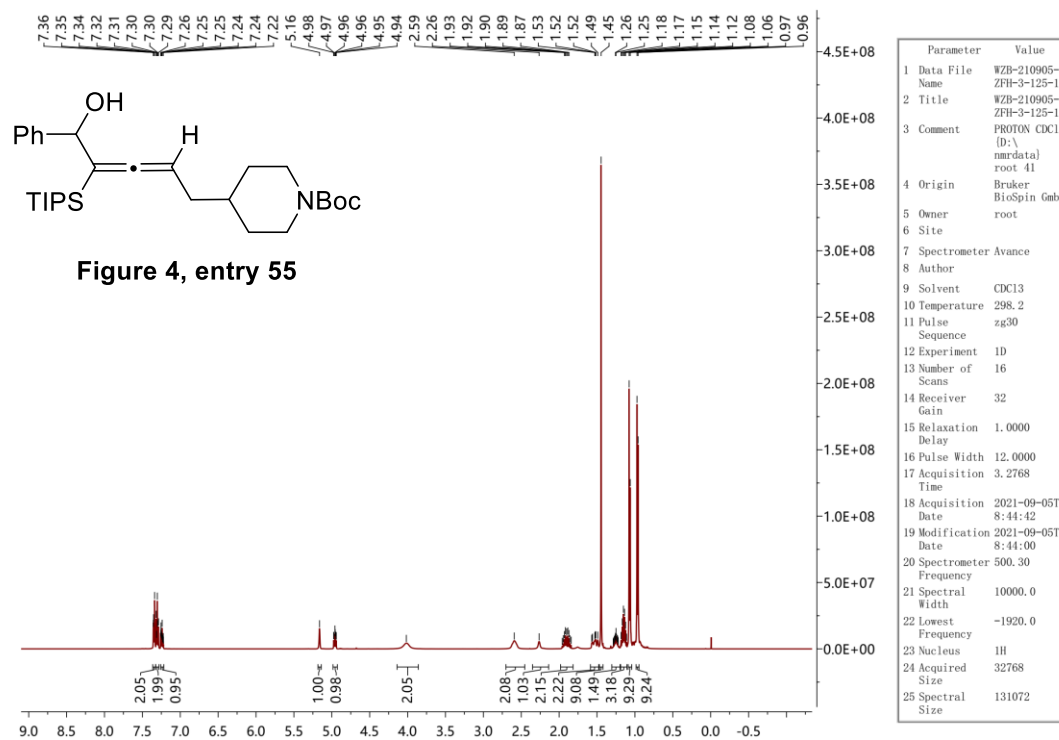

**Supplementary Figure 120.** <sup>1</sup>H NMR spectrum of compound 55

<sup>13</sup>C NMR (126 MHz, room temperature, CDCl<sub>3</sub>)

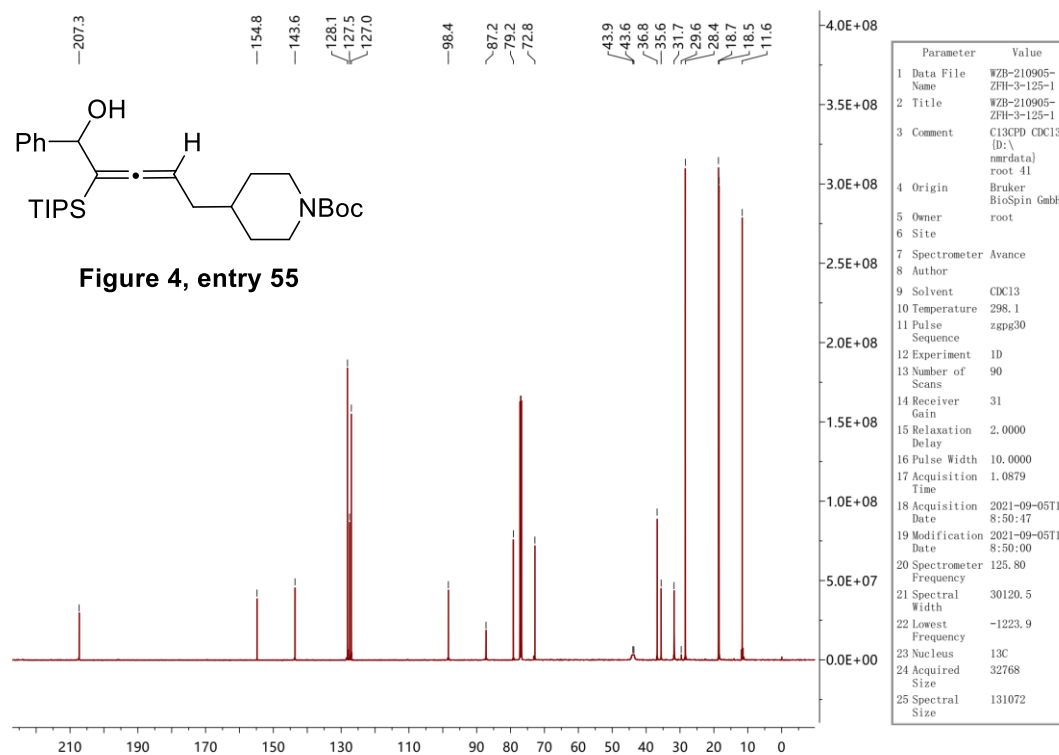

**Supplementary Figure 121.** <sup>13</sup>C NMR spectrum of compound 55

<sup>1</sup>H NMR (500 MHz, room temperature, CDCl<sub>3</sub>)

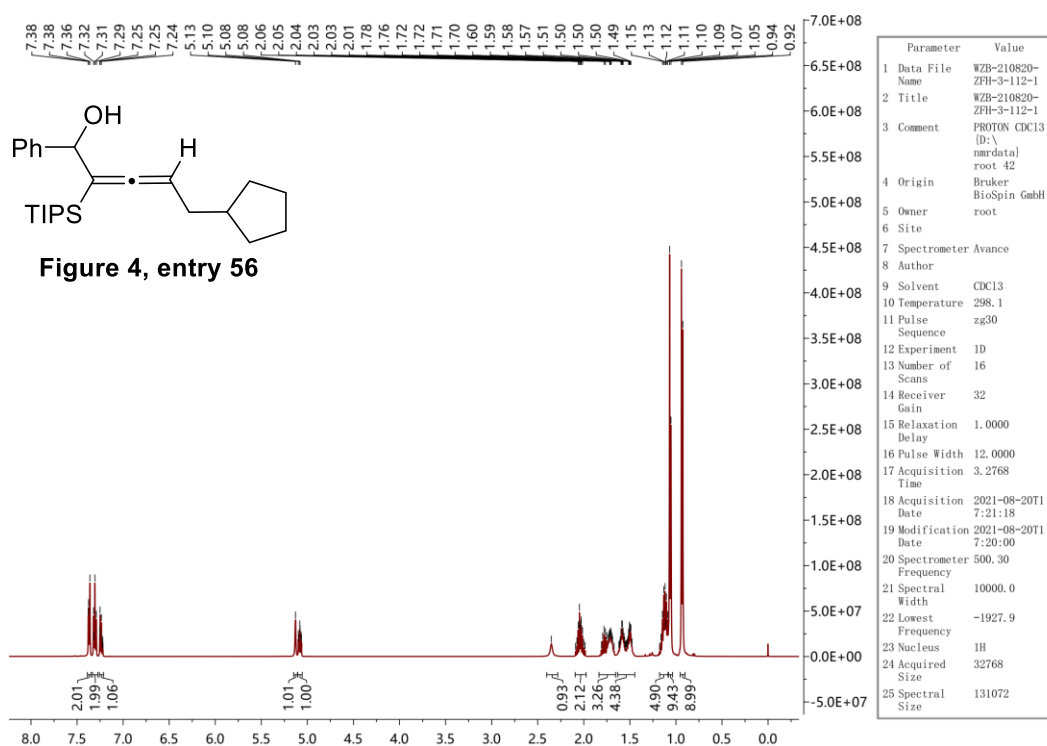

**Supplementary Figure 122.** <sup>1</sup>H NMR spectrum of compound 56

<sup>13</sup>C NMR (126 MHz, room temperature, CDCl<sub>3</sub>)

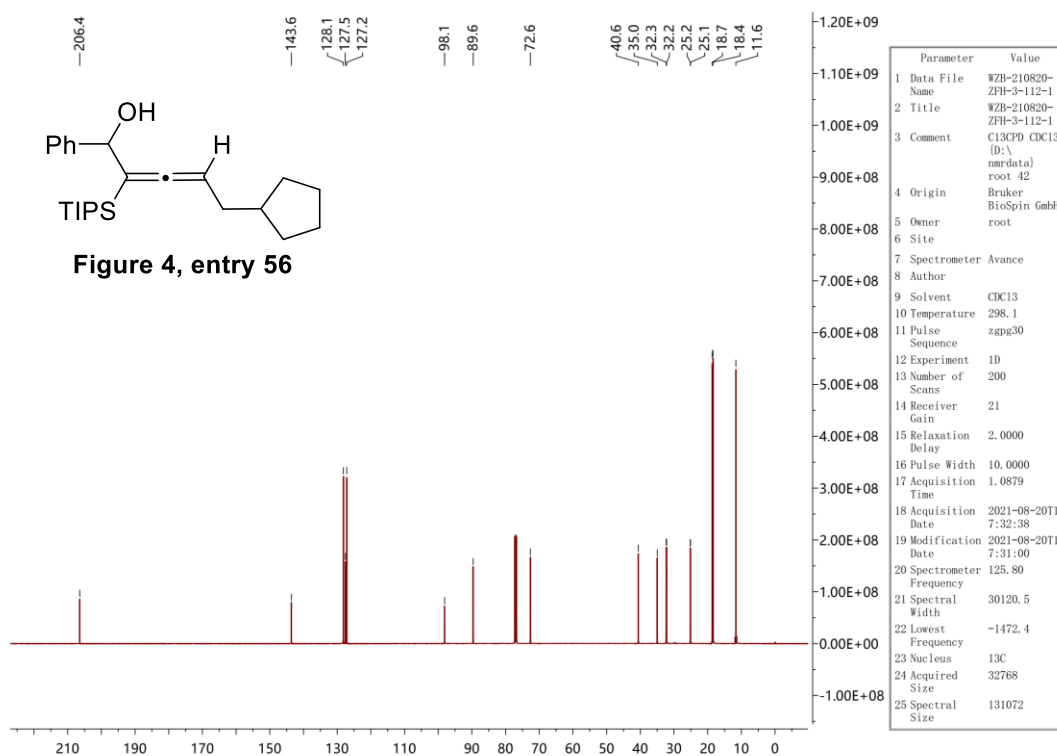

**Supplementary Figure 123.** <sup>13</sup>C NMR spectrum of compound 56



<sup>1</sup>H NMR (500 MHz, room temperature, CDCl<sub>3</sub>)

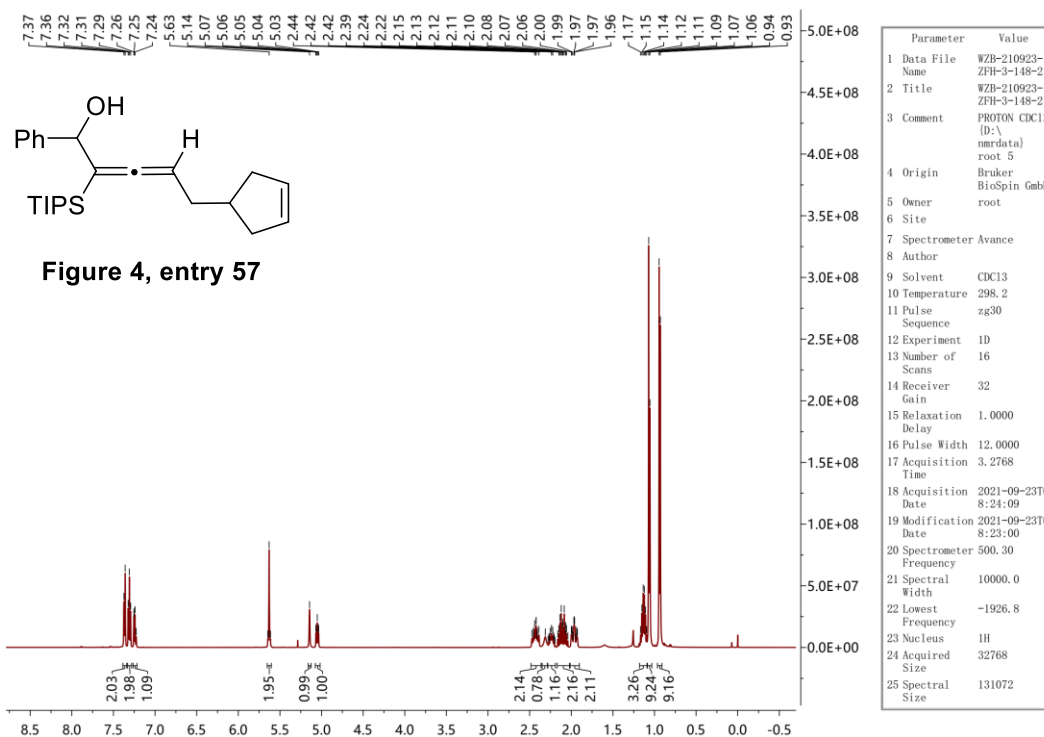

**Supplementary Figure 124.** <sup>1</sup>H NMR spectrum of compound 57

<sup>13</sup>C NMR (126 MHz, room temperature, CDCl<sub>3</sub>)

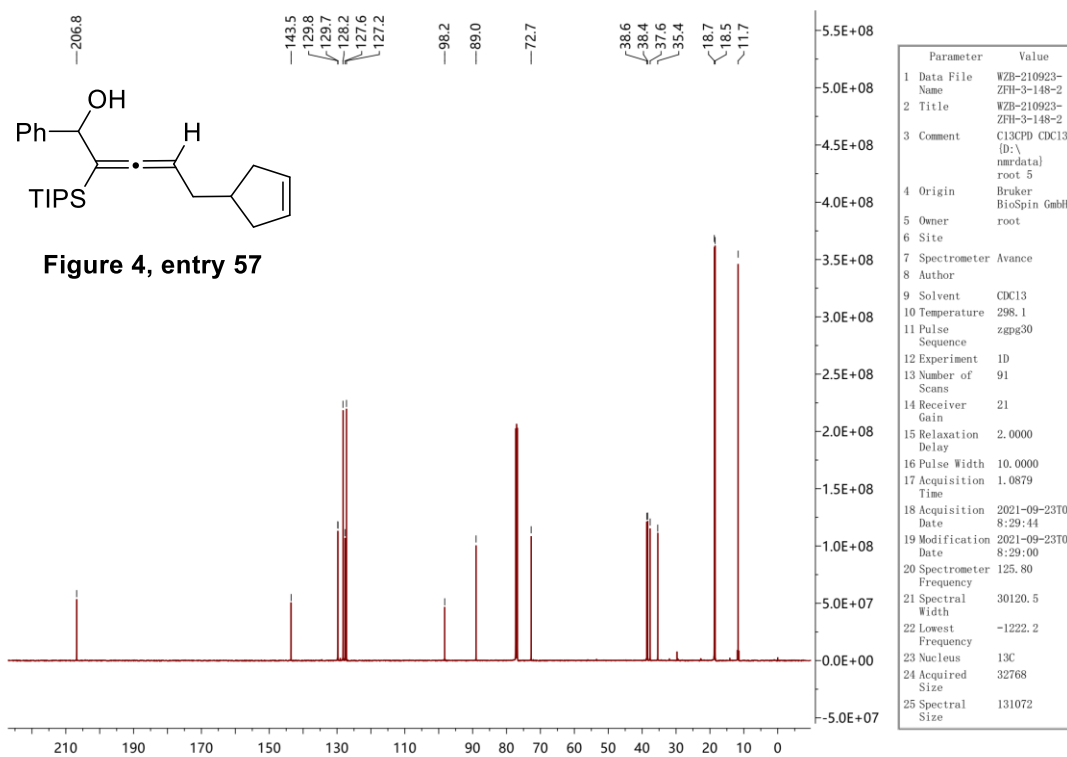

**Supplementary Figure 125.** <sup>13</sup>C NMR spectrum of compound 57

<sup>1</sup>H NMR (500 MHz, room temperature, CDCl<sub>3</sub>)

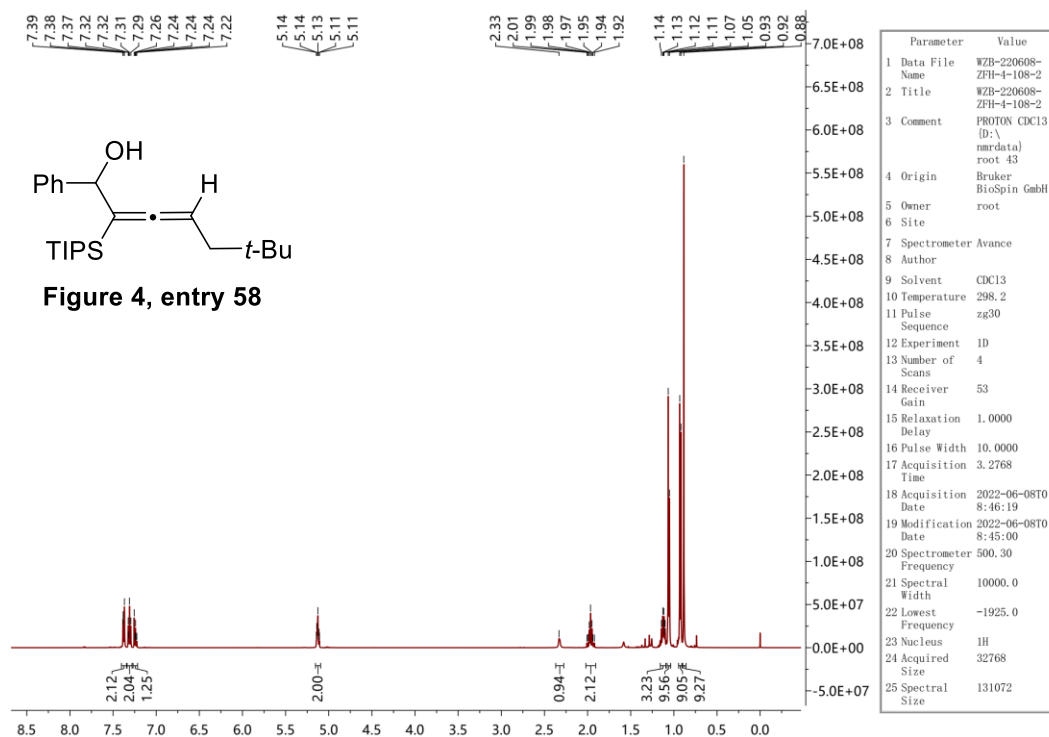

**Supplementary Figure 126.** <sup>1</sup>H NMR spectrum of compound 58

<sup>13</sup>C NMR (126 MHz, room temperature, CDCl<sub>3</sub>)

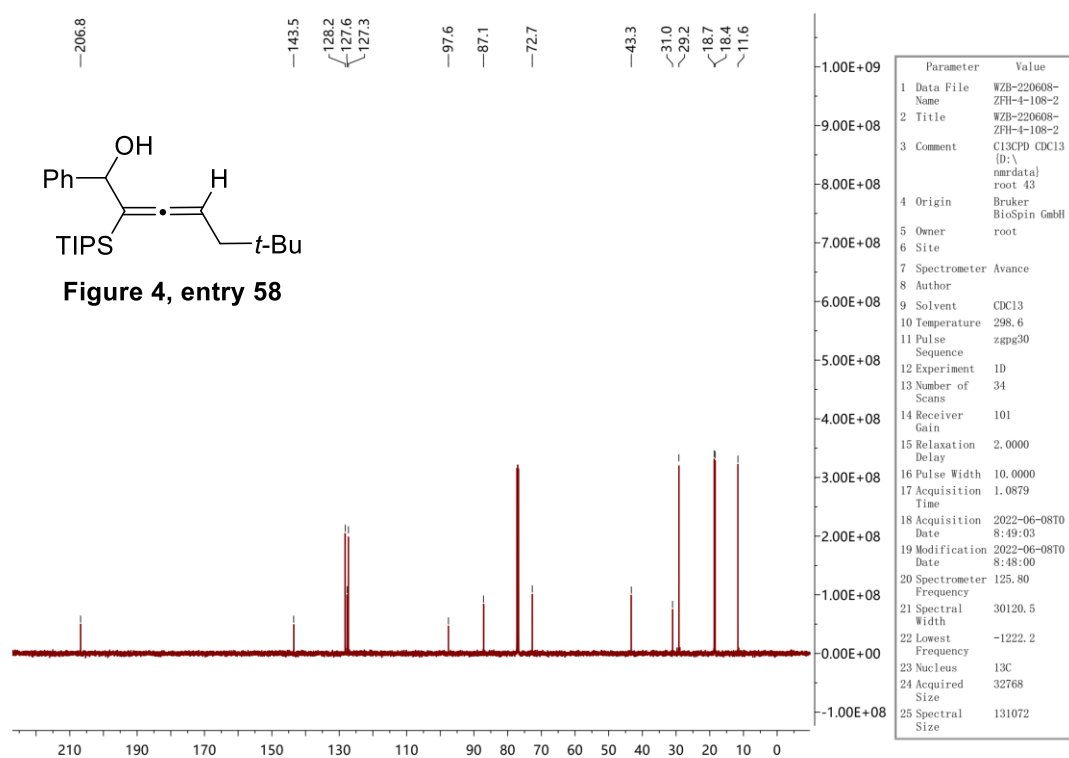

**Supplementary Figure 127.** <sup>13</sup>C NMR spectrum of compound 58

$^1\text{H}$  NMR (500 MHz, room temperature,  $\text{CDCl}_3$ )

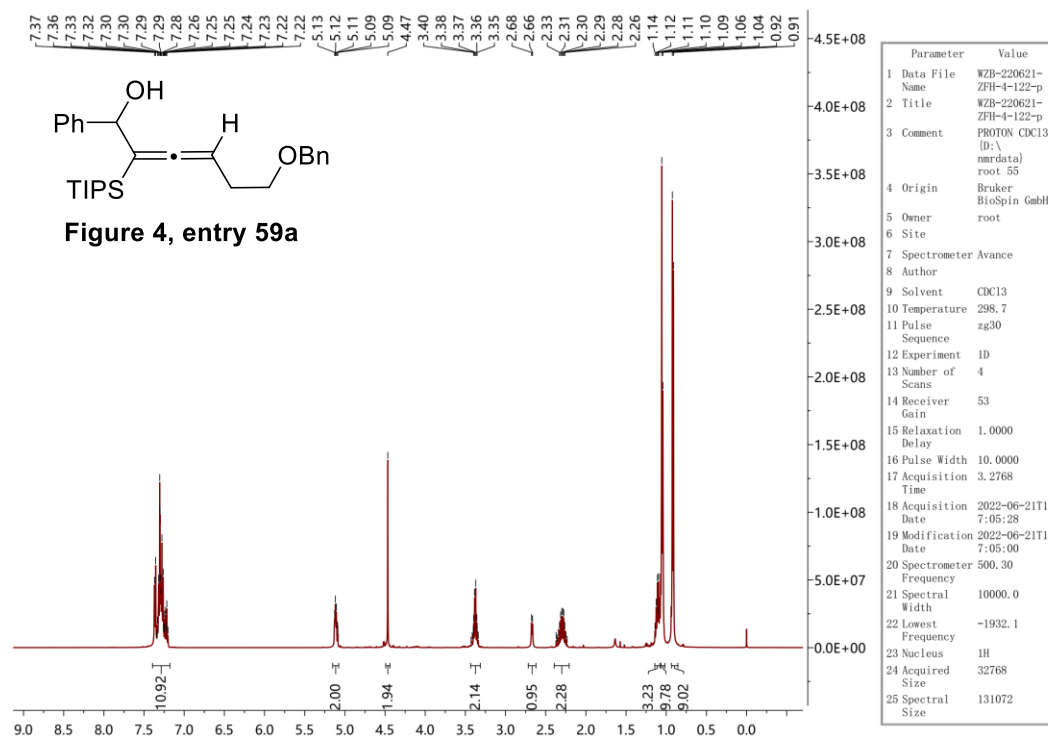

**Supplementary Figure 128.**  $^1\text{H}$  NMR spectrum of compound 59a

$^{13}\text{C}$  NMR (126 MHz, room temperature,  $\text{CDCl}_3$ )

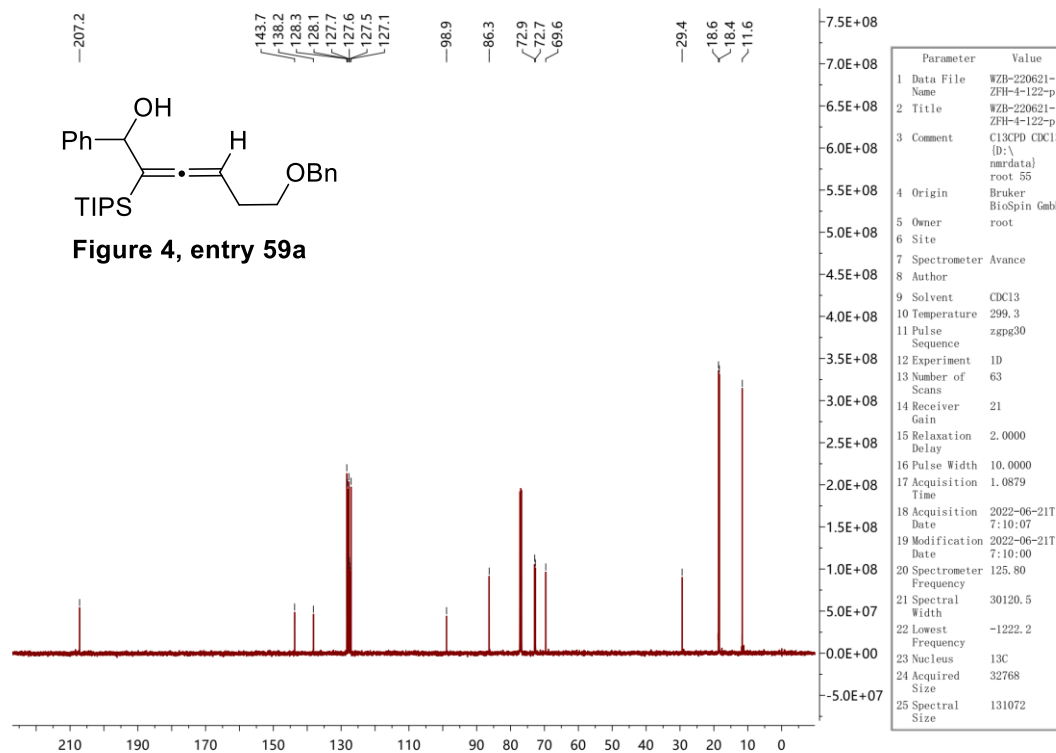

**Supplementary Figure 129.**  $^{13}\text{C}$  NMR spectrum of compound 59a

<sup>1</sup>H NMR (500 MHz, room temperature, CDCl<sub>3</sub>)

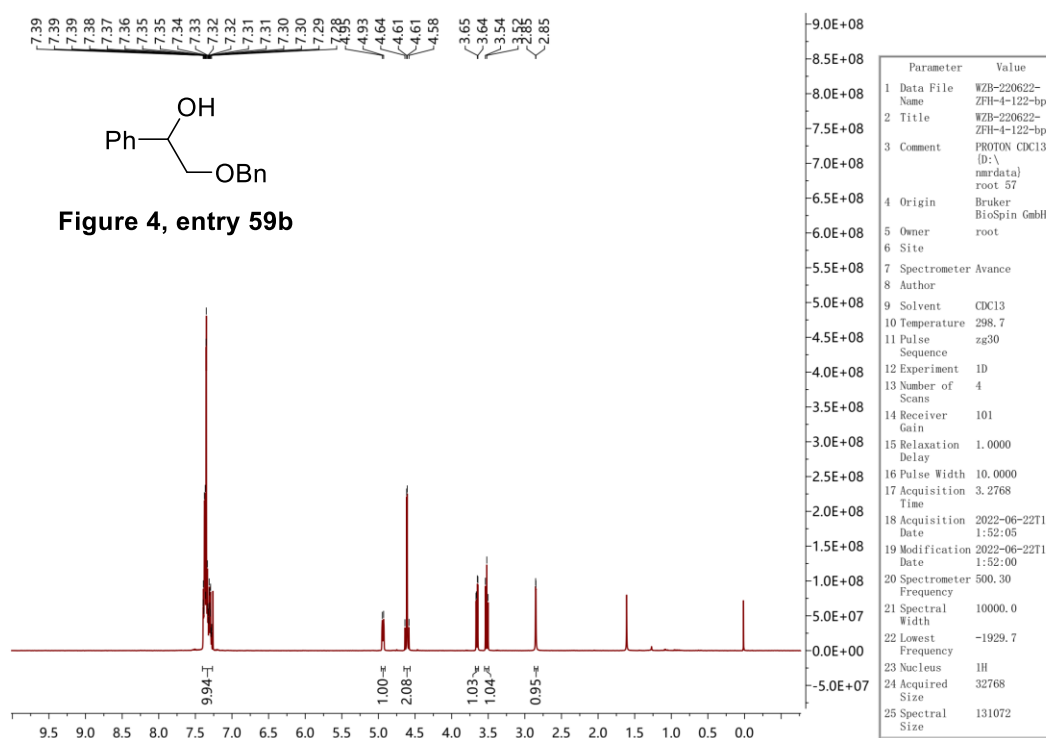

**Supplementary Figure 130.** <sup>1</sup>H NMR spectrum of compound **59a**

<sup>13</sup>C NMR (126 MHz, room temperature, CDCl<sub>3</sub>)

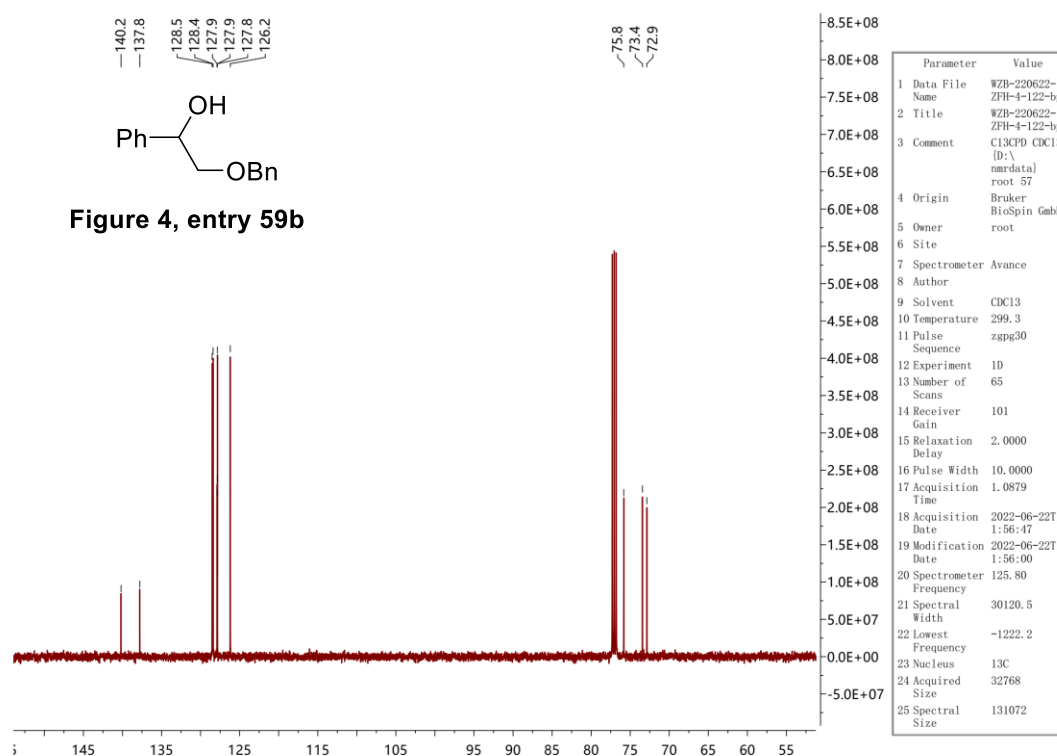

**Supplementary Figure 131.** <sup>13</sup>C NMR spectrum of compound **59b**

$^1\text{H}$  NMR (500 MHz, room temperature,  $\text{CDCl}_3$ )

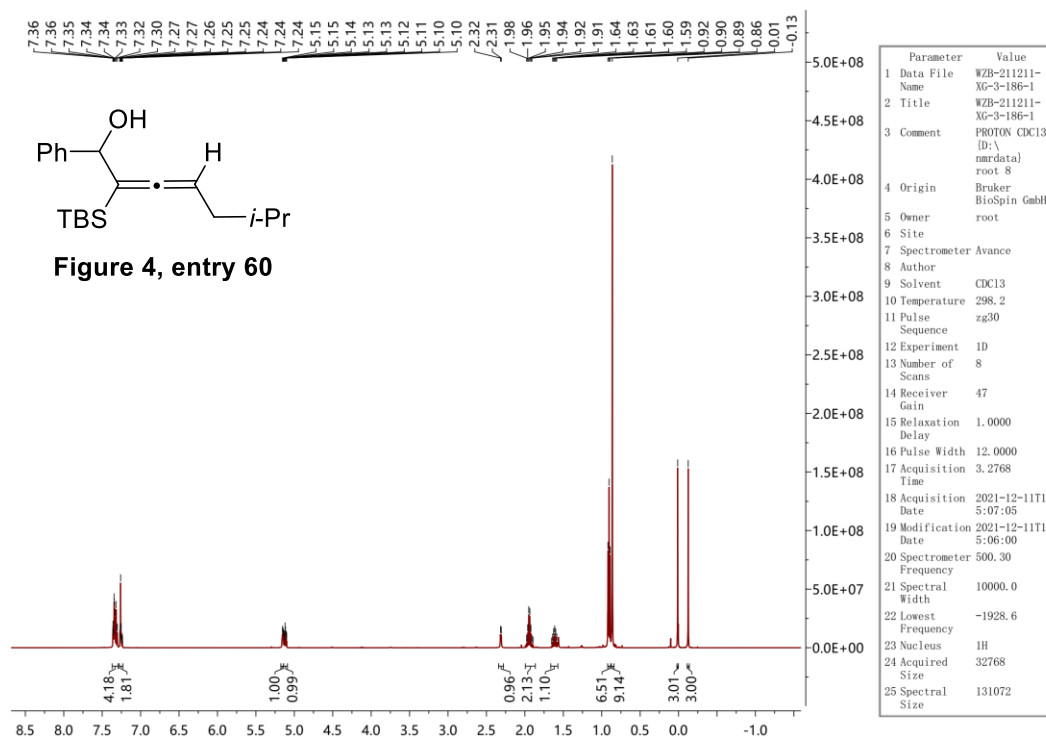

**Supplementary Figure 132.**  $^1\text{H}$  NMR spectrum of compound 60

$^{13}\text{C}$  NMR (126 MHz, room temperature,  $\text{CDCl}_3$ )

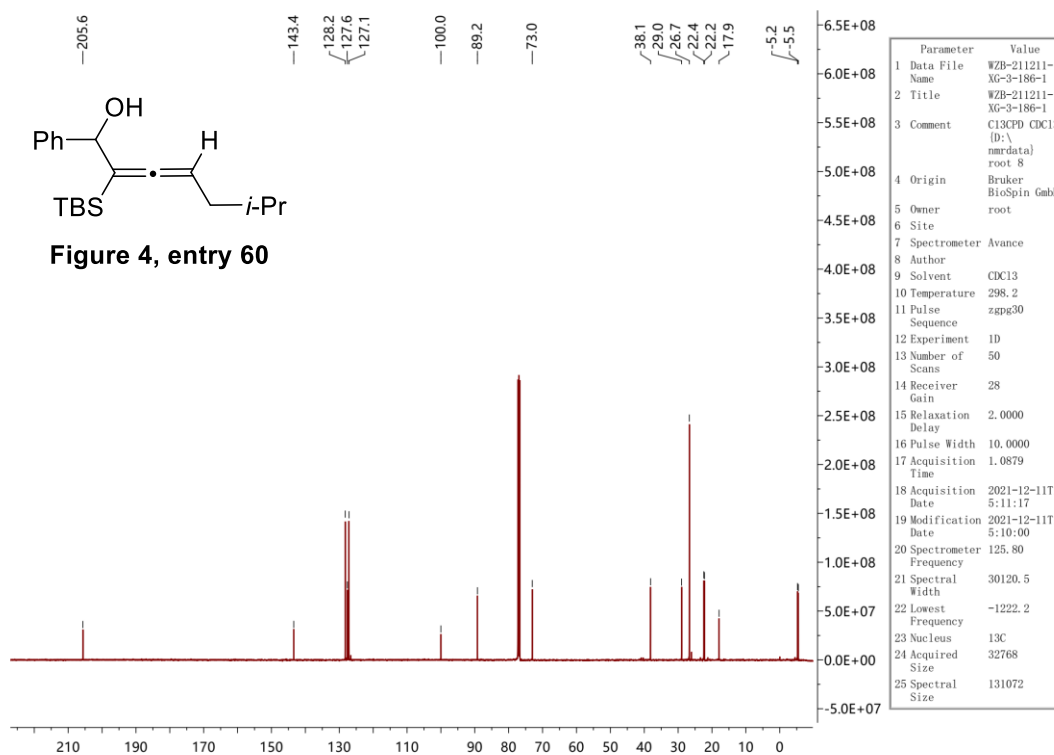

**Supplementary Figure 133.**  $^{13}\text{C}$  NMR spectrum of compound 60

<sup>1</sup>H NMR (500 MHz, room temperature, CDCl<sub>3</sub>)

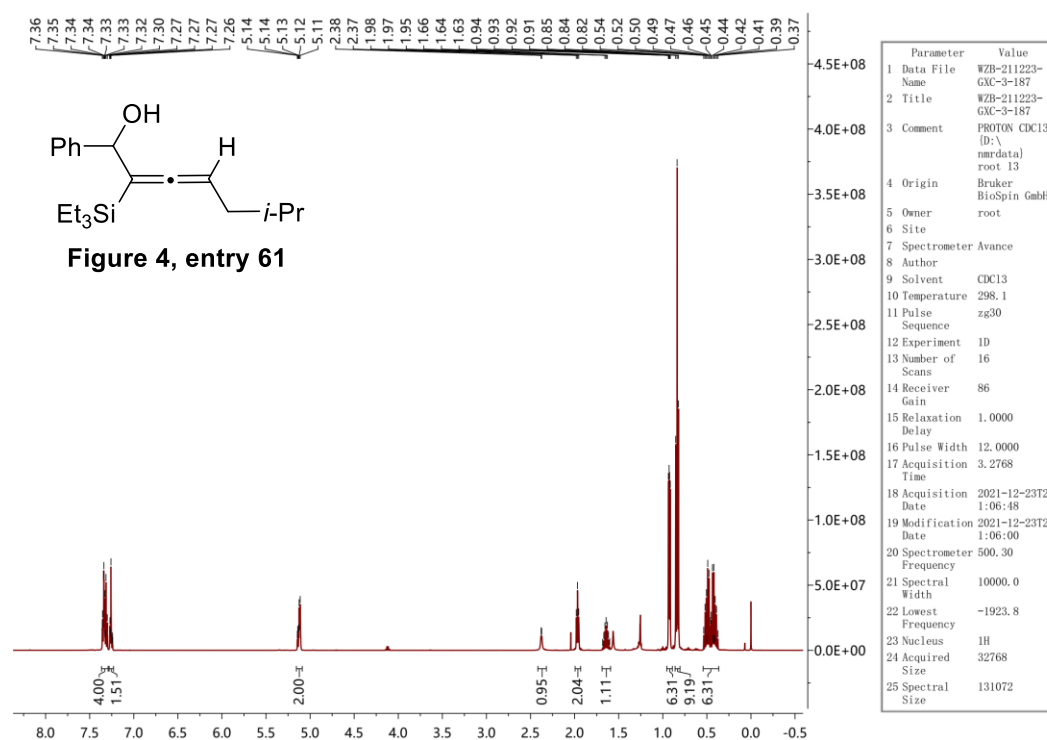

**Supplementary Figure 134.** <sup>1</sup>H NMR spectrum of compound 61

<sup>13</sup>C NMR (126 MHz, room temperature, CDCl<sub>3</sub>)

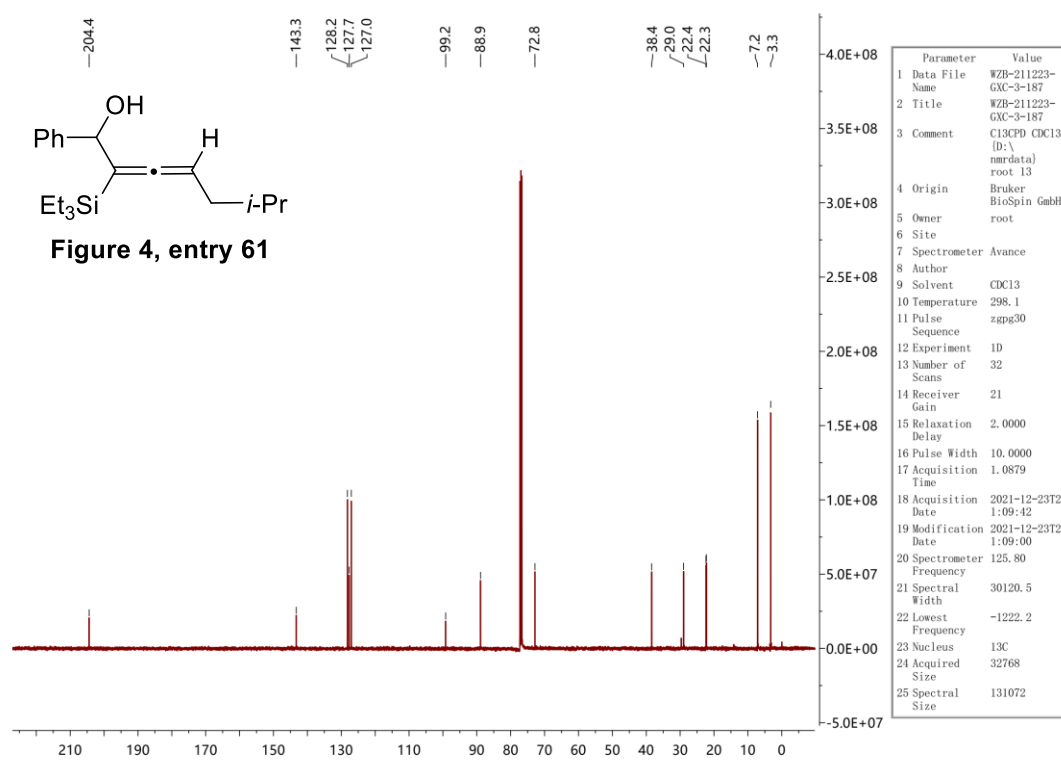

**Supplementary Figure 135.** <sup>13</sup>C NMR spectrum of compound 61

<sup>1</sup>H NMR (500 MHz, room temperature, CDCl<sub>3</sub>)

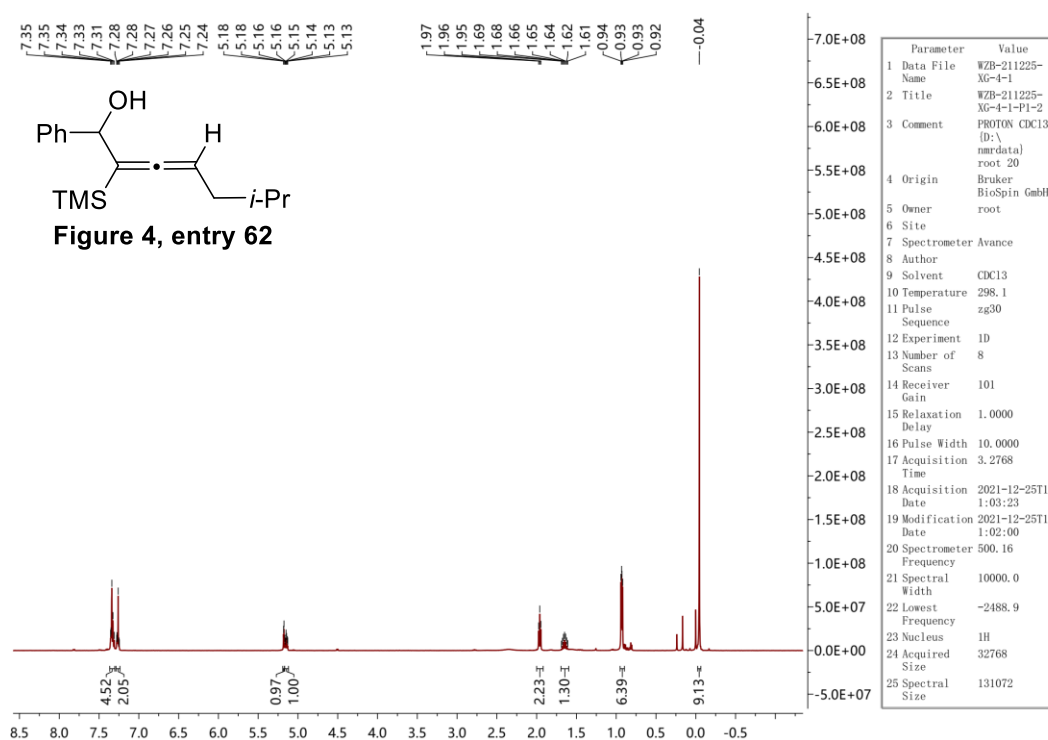

**Supplementary Figure 136.** <sup>1</sup>H NMR spectrum of compound 62

<sup>13</sup>C NMR (126 MHz, room temperature, CDCl<sub>3</sub>)

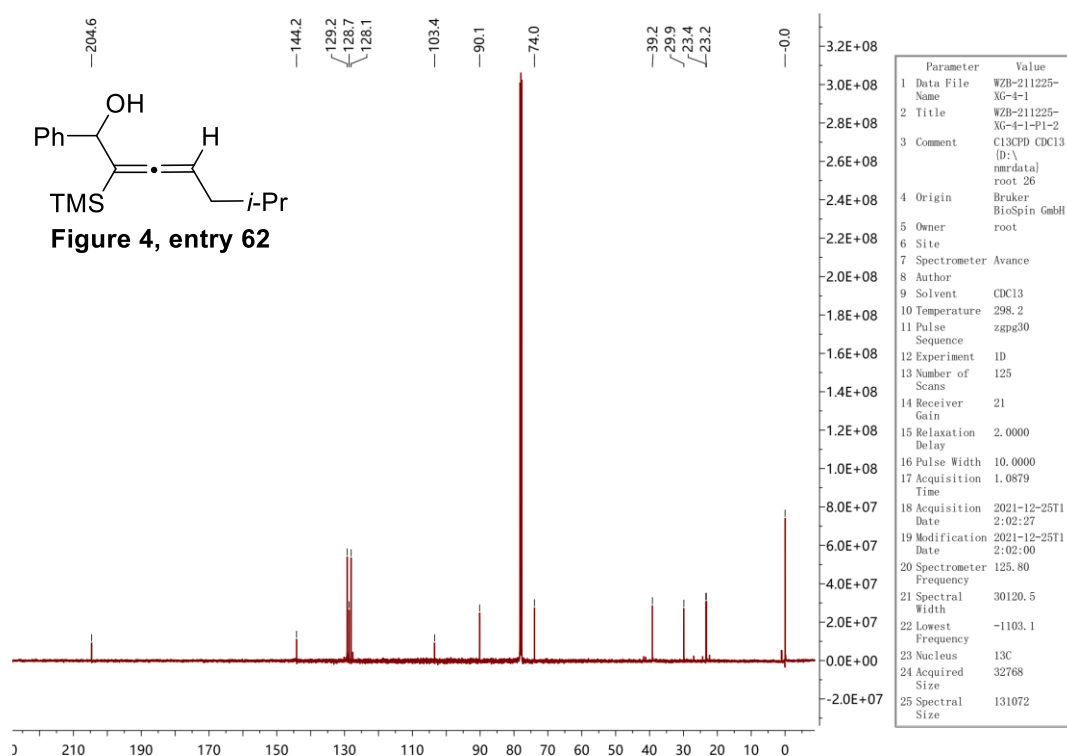

**Supplementary Figure 137.** <sup>13</sup>C NMR spectrum of compound 62

<sup>1</sup>H NMR (500 MHz, room temperature, CDCl<sub>3</sub>)

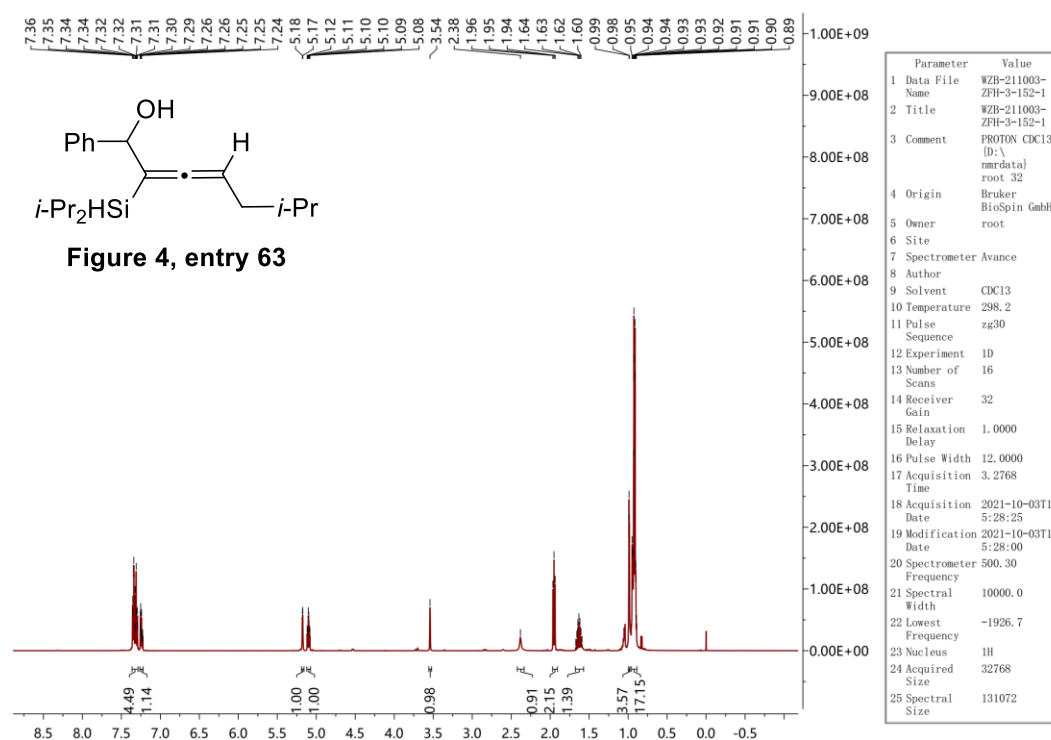

**Supplementary Figure 138.** <sup>1</sup>H NMR spectrum of compound 63

<sup>13</sup>C NMR (126 MHz, room temperature, CDCl<sub>3</sub>)

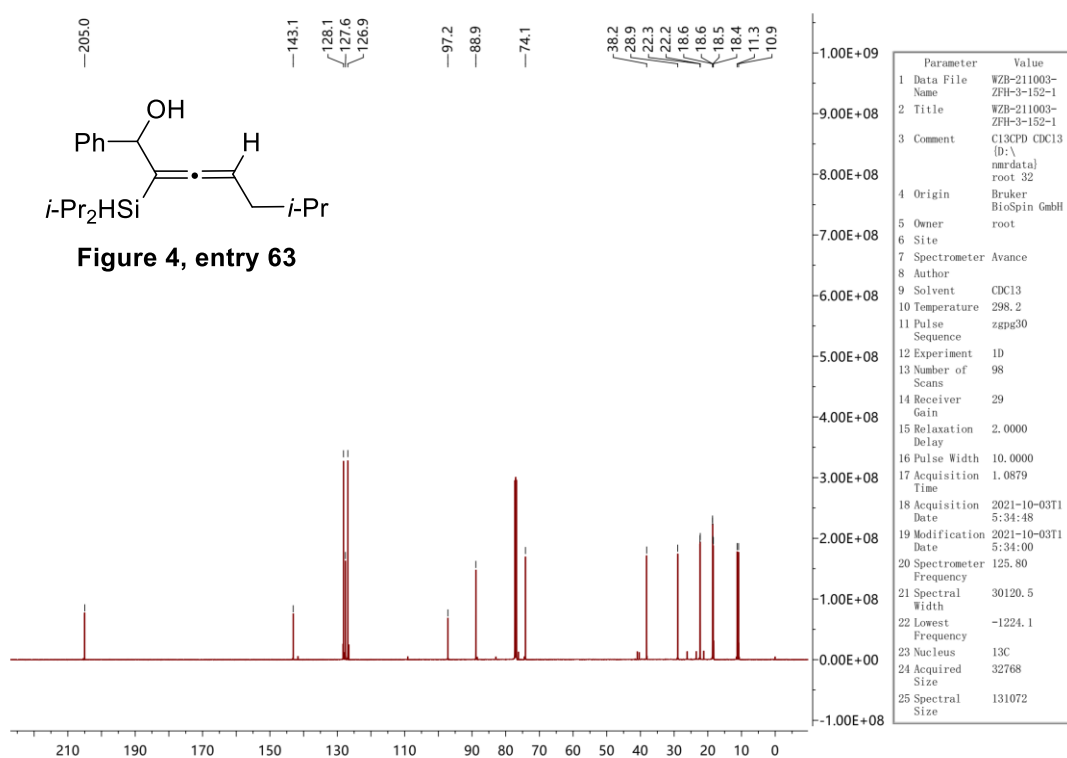

**Supplementary Figure 139.** <sup>13</sup>C NMR spectrum of compound 63



<sup>1</sup>H NMR (500 MHz, room temperature, CDCl<sub>3</sub>)

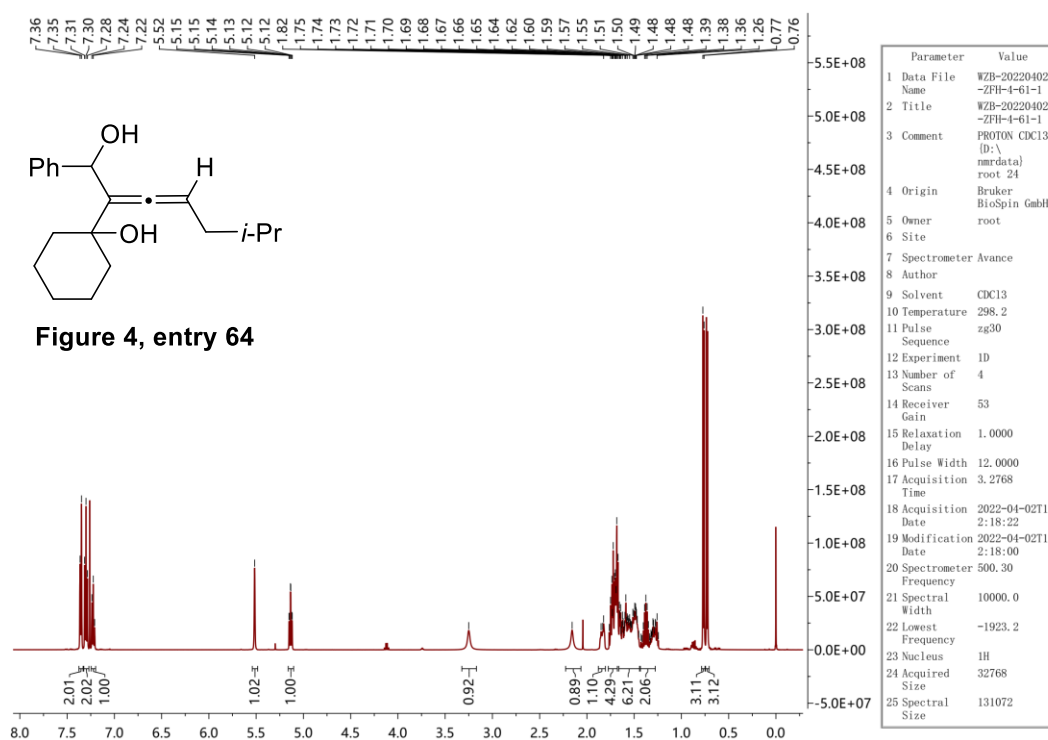

**Supplementary Figure 140.** <sup>1</sup>H NMR spectrum of compound 64

<sup>13</sup>C NMR (126 MHz, room temperature, CDCl<sub>3</sub>)

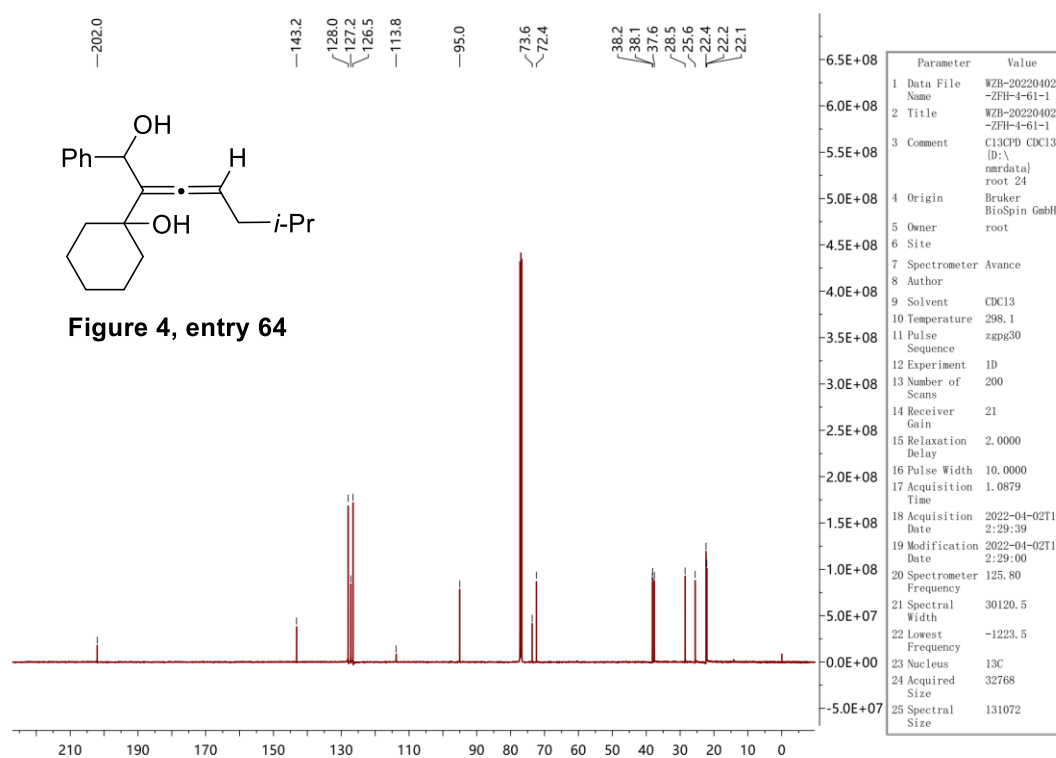

**Supplementary Figure 141.** <sup>13</sup>C NMR spectrum of compound 64

$^1\text{H}$  NMR (500 MHz, room temperature,  $\text{CDCl}_3$ )

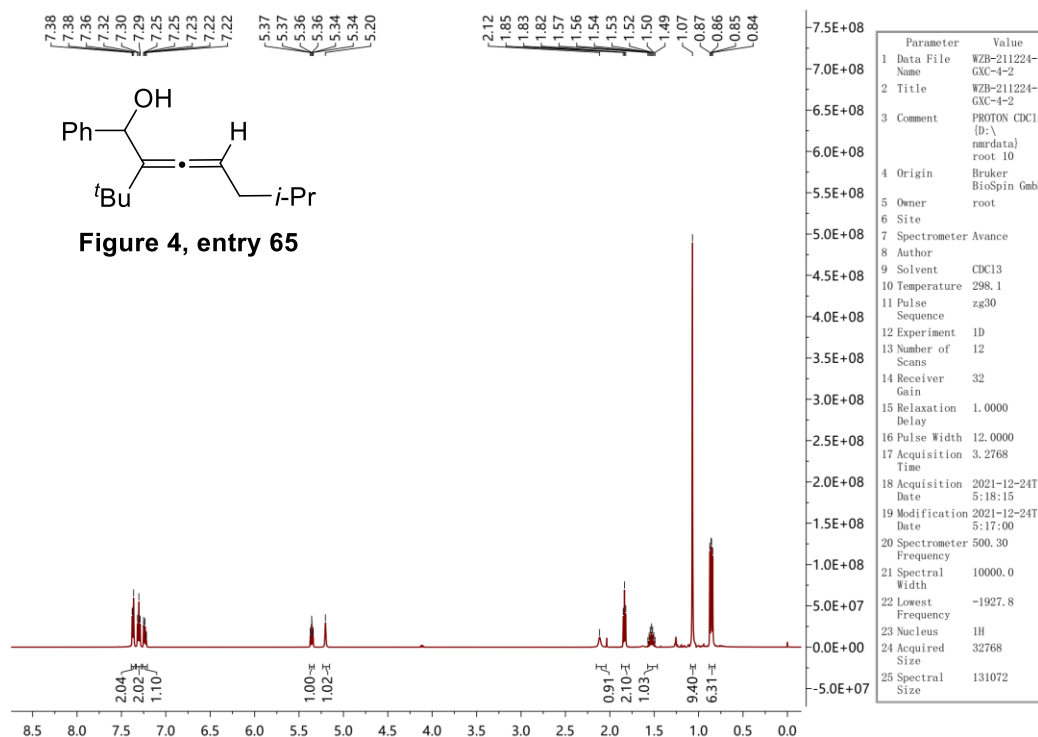

**Supplementary Figure 142.**  $^1\text{H}$  NMR spectrum of compound 65

$^{13}\text{C}$  NMR (126 MHz, room temperature,  $\text{CDCl}_3$ )

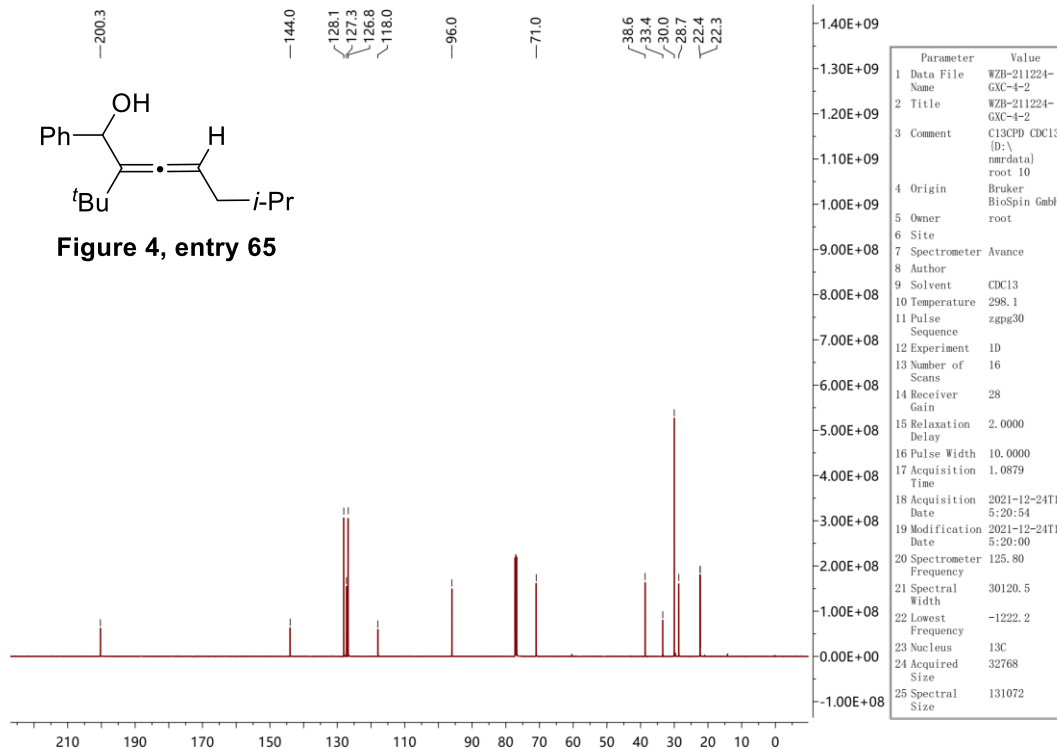

**Supplementary Figure 143.**  $^{13}\text{C}$  NMR spectrum of compound 65

<sup>1</sup>H NMR (500 MHz, room temperature, CDCl<sub>3</sub>)

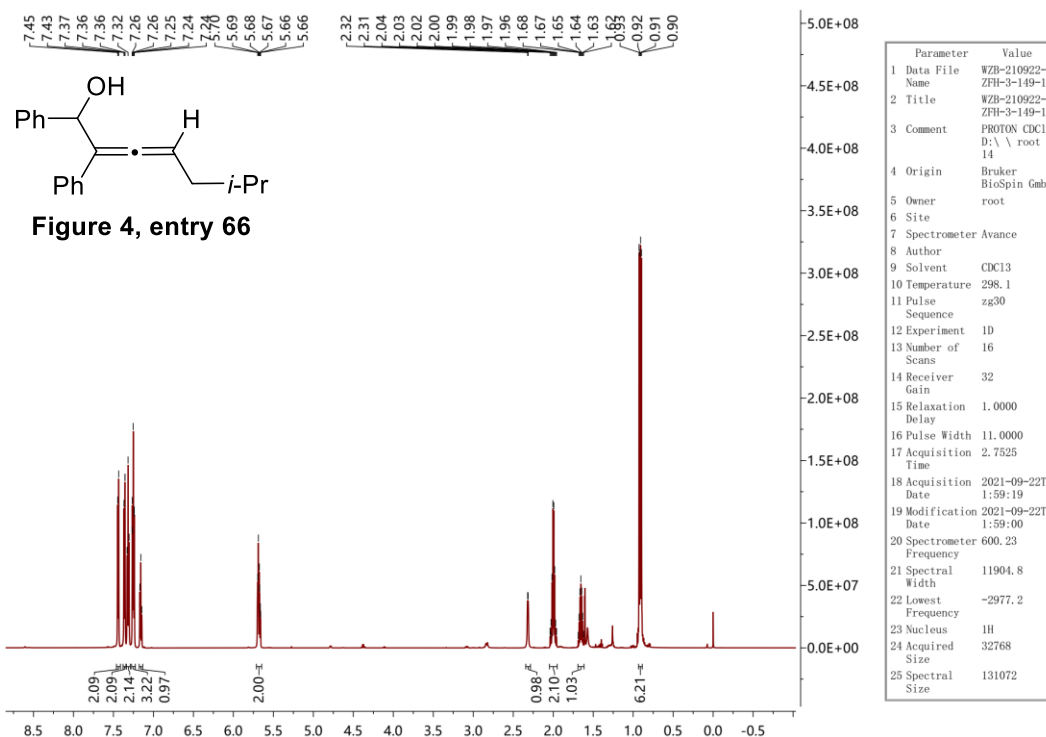

**Supplementary Figure 144.** <sup>1</sup>H NMR spectrum of compound 66

<sup>13</sup>C NMR (126 MHz, room temperature, CDCl<sub>3</sub>)

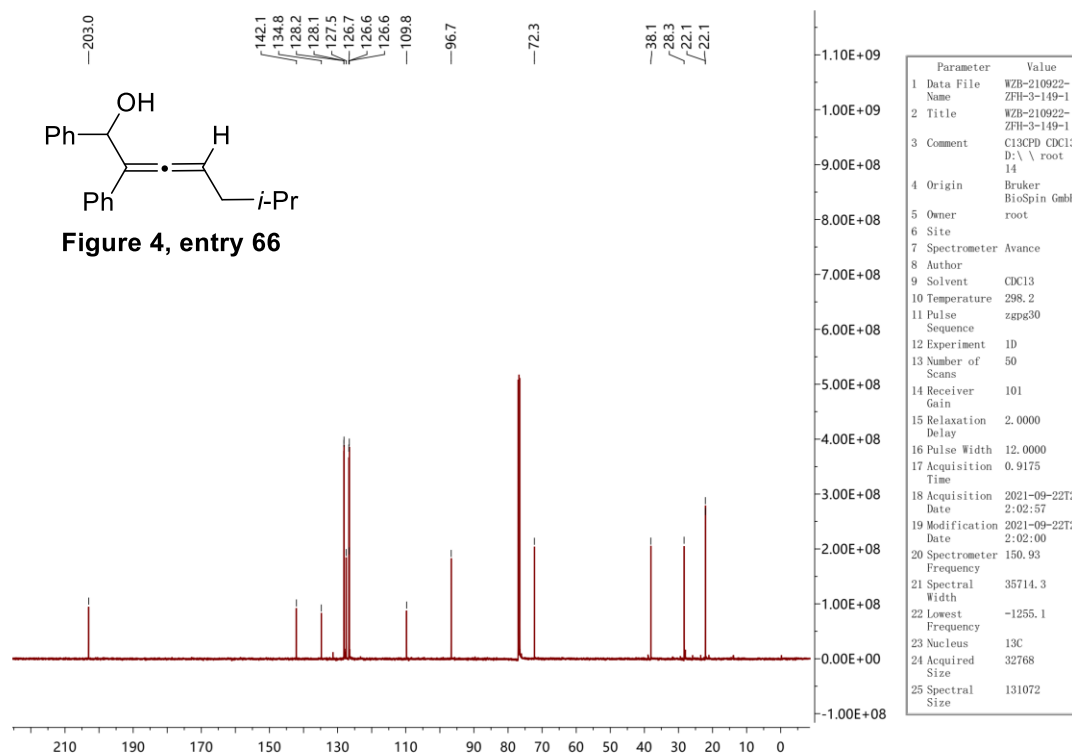

**Supplementary Figure 145.** <sup>13</sup>C NMR spectrum of compound 66

<sup>1</sup>H NMR (500 MHz, room temperature, CDCl<sub>3</sub>)

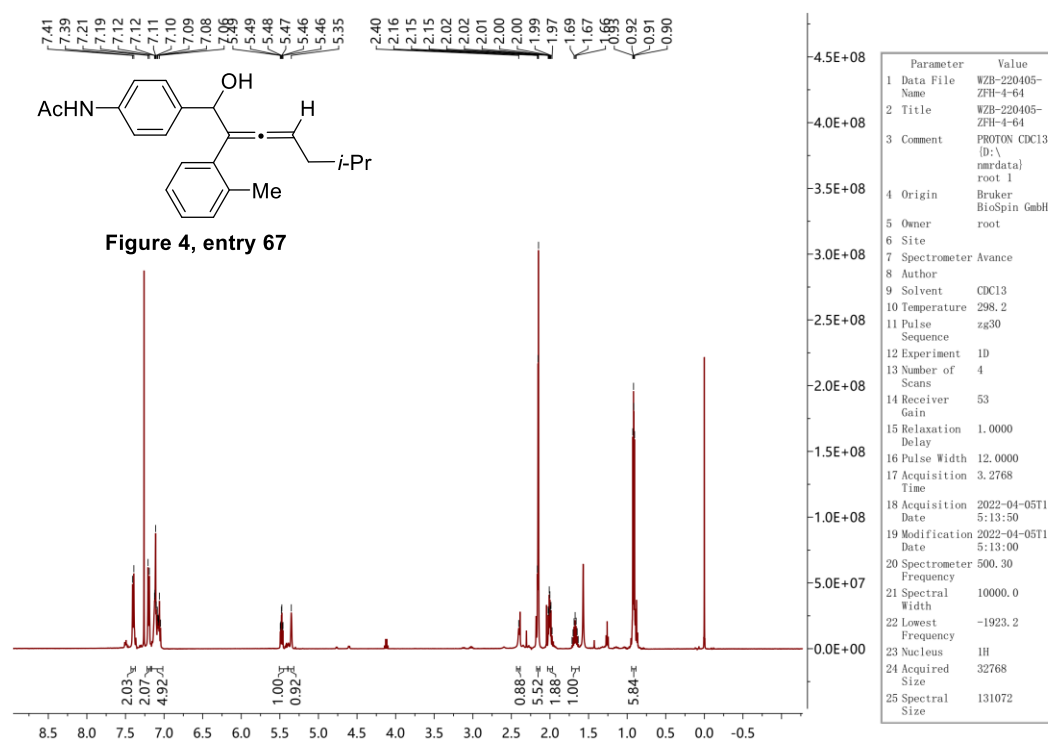

**Supplementary Figure 146.** <sup>1</sup>H NMR spectrum of compound 67

<sup>13</sup>C NMR (126 MHz, room temperature, CDCl<sub>3</sub>)

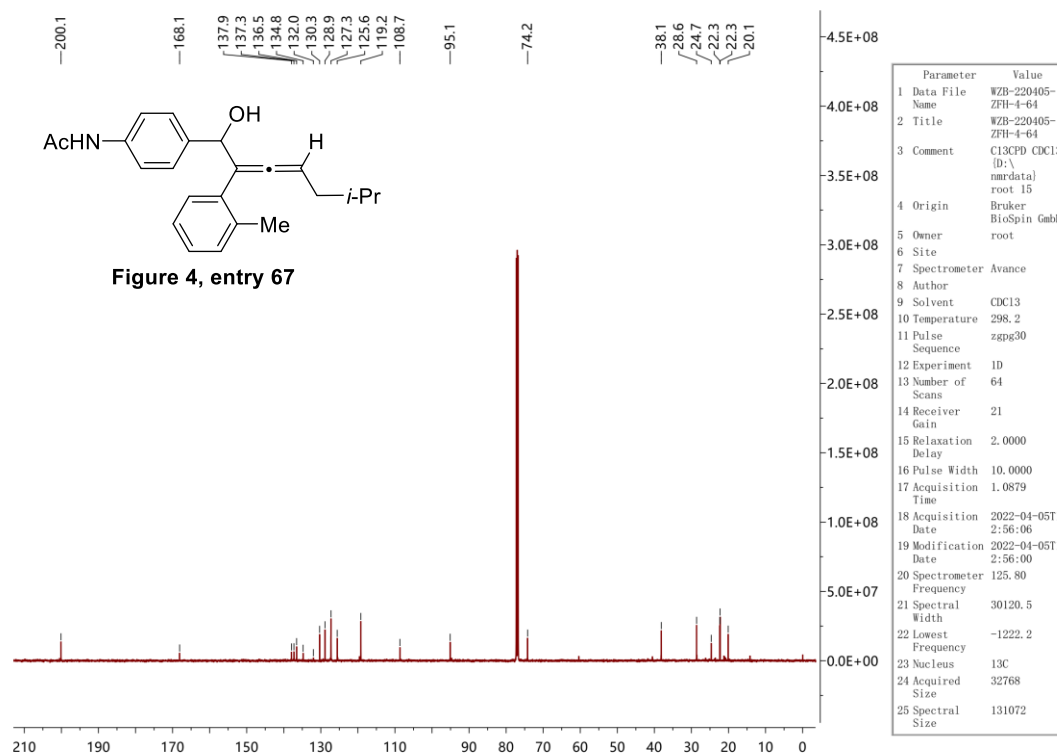

**Supplementary Figure 147.** <sup>13</sup>C NMR spectrum of compound 67

<sup>1</sup>H NMR (500 MHz, room temperature, CDCl<sub>3</sub>)

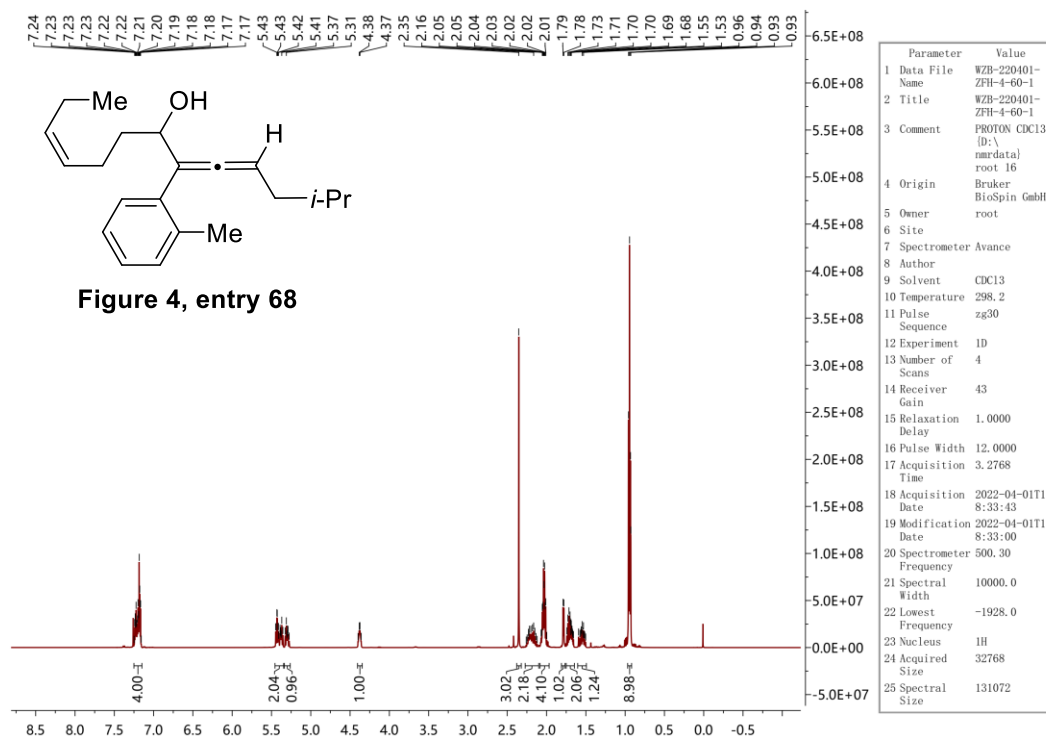

**Supplementary Figure 148.** <sup>1</sup>H NMR spectrum of compound 68

<sup>13</sup>C NMR (126 MHz, room temperature, CDCl<sub>3</sub>)

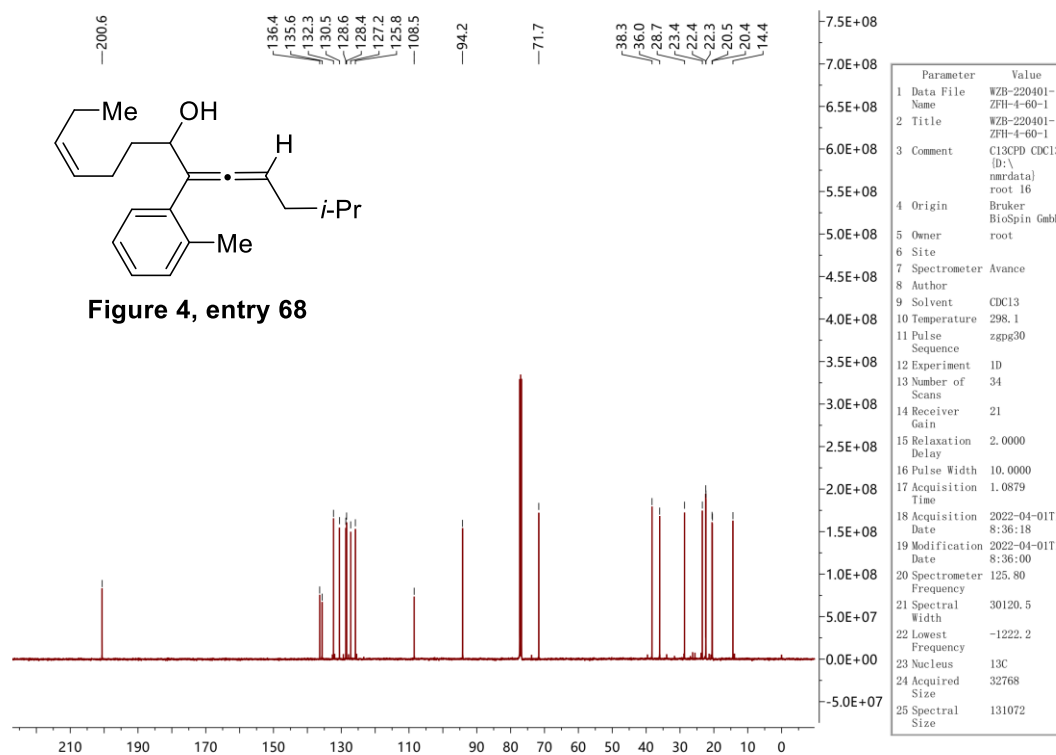

**Supplementary Figure 149.** <sup>13</sup>C NMR spectrum of compound 68

<sup>1</sup>H NMR (500 MHz, room temperature, CDCl<sub>3</sub>)

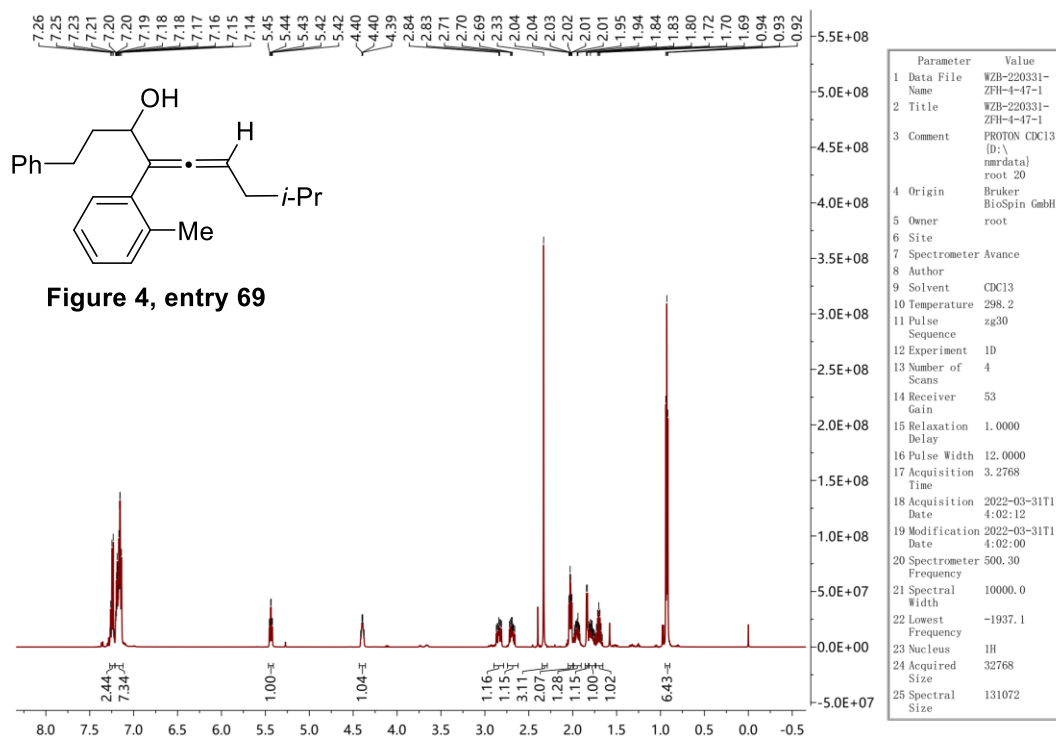

**Supplementary Figure 150.** <sup>1</sup>H NMR spectrum of compound 69

<sup>13</sup>C NMR (126 MHz, room temperature, CDCl<sub>3</sub>)

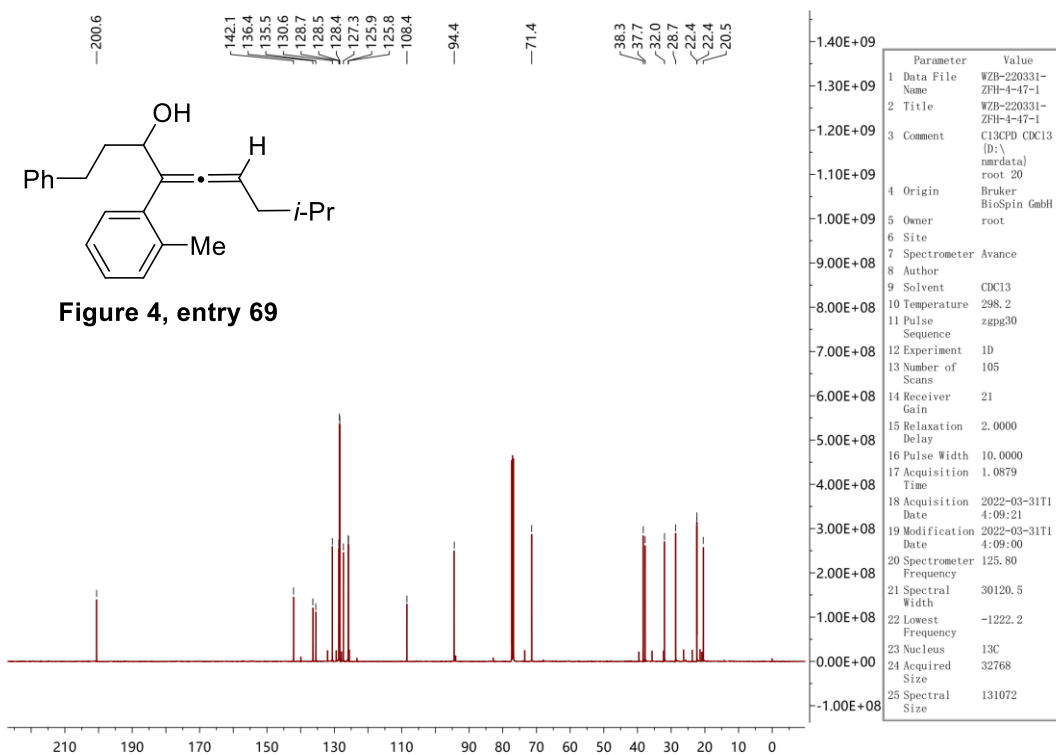

**Supplementary Figure 151.** <sup>13</sup>C NMR spectrum of compound 69

<sup>1</sup>H NMR (500 MHz, room temperature, CDCl<sub>3</sub>)

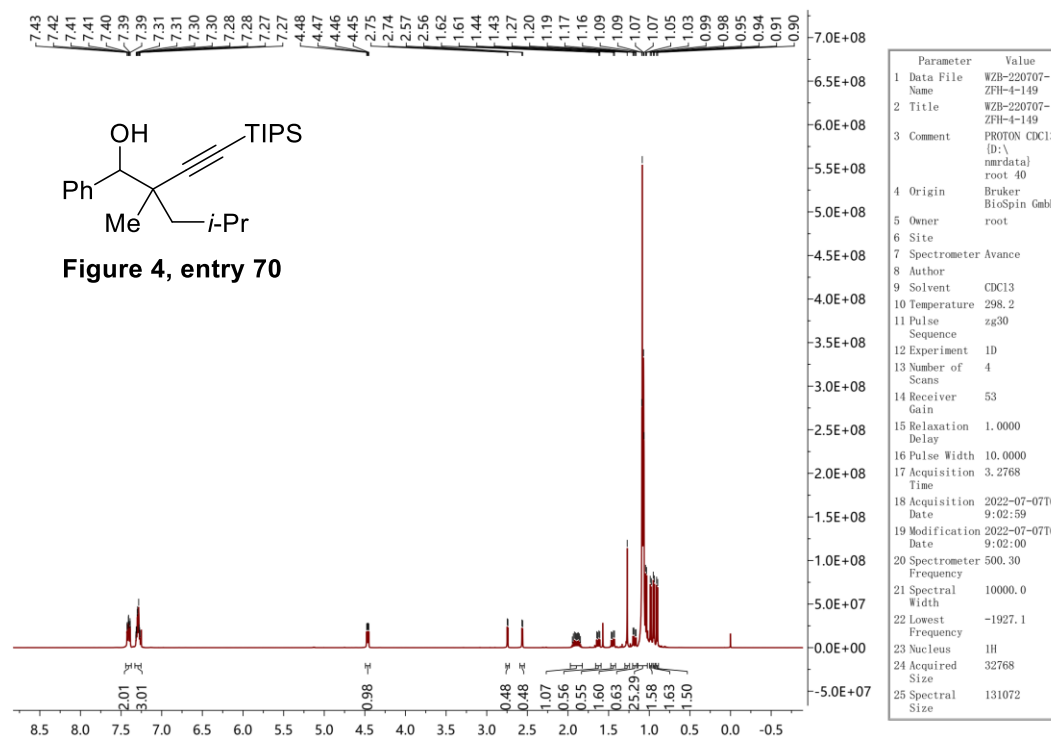

**Supplementary Figure 152.** <sup>1</sup>H NMR spectrum of compound 70

<sup>13</sup>C NMR (126 MHz, room temperature, CDCl<sub>3</sub>)

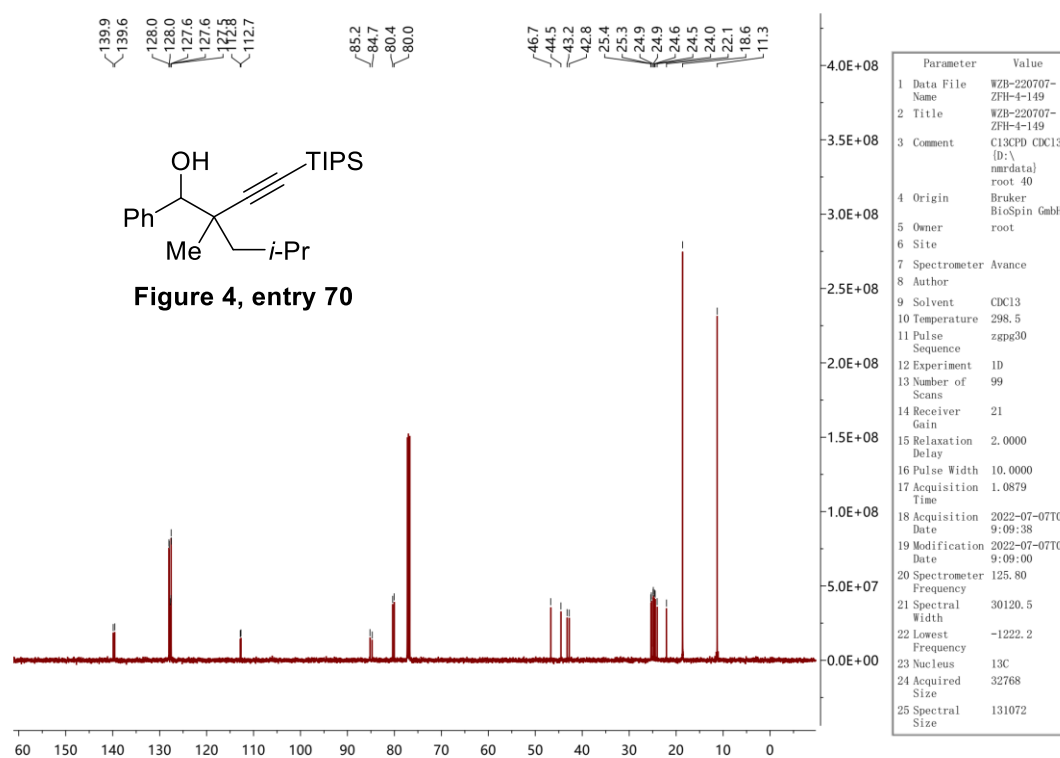

**Supplementary Figure 153.** <sup>13</sup>C NMR spectrum of compound 70

<sup>1</sup>H NMR (500 MHz, room temperature, CDCl<sub>3</sub>)

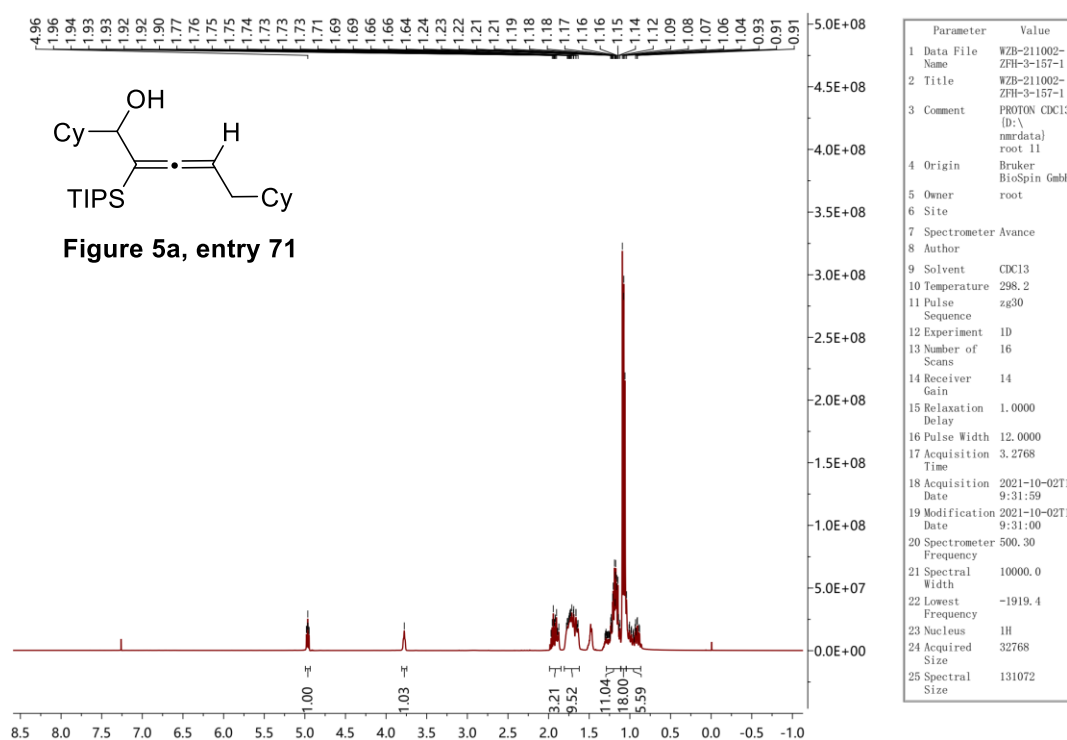

**Supplementary Figure 154.** <sup>1</sup>H NMR spectrum of compound 71

<sup>13</sup>C NMR (126 MHz, room temperature, CDCl<sub>3</sub>)

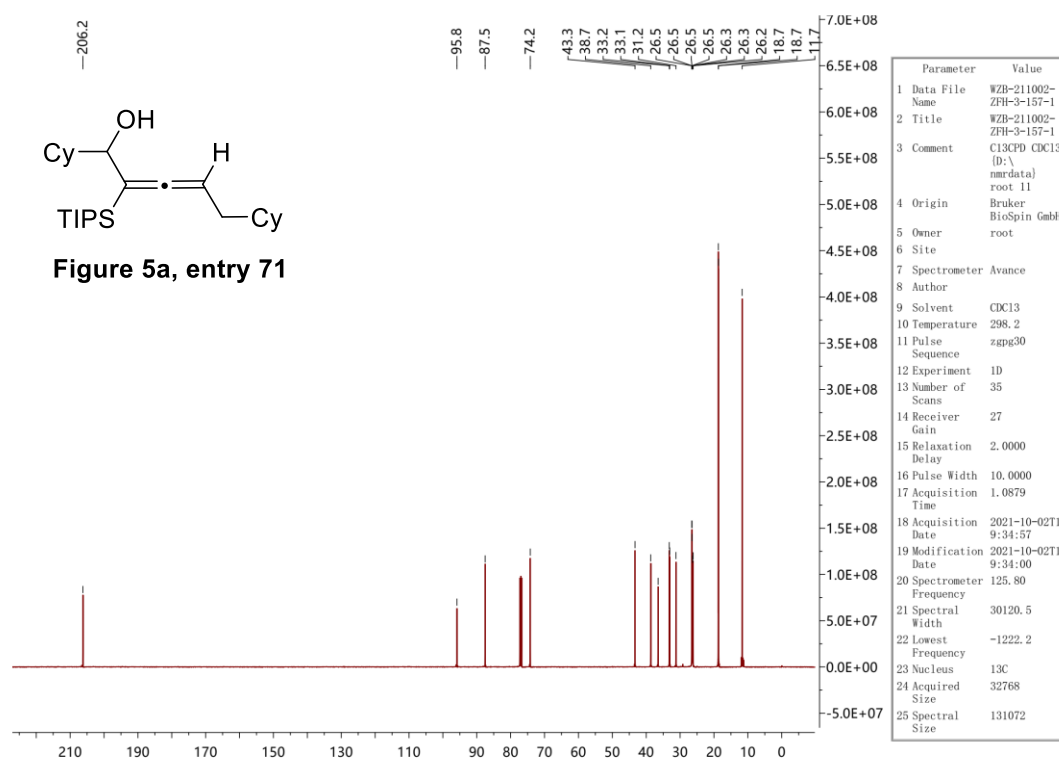

**Supplementary Figure 155.** <sup>13</sup>C NMR spectrum of compound 71



<sup>1</sup>H NMR (500 MHz, room temperature, CDCl<sub>3</sub>)

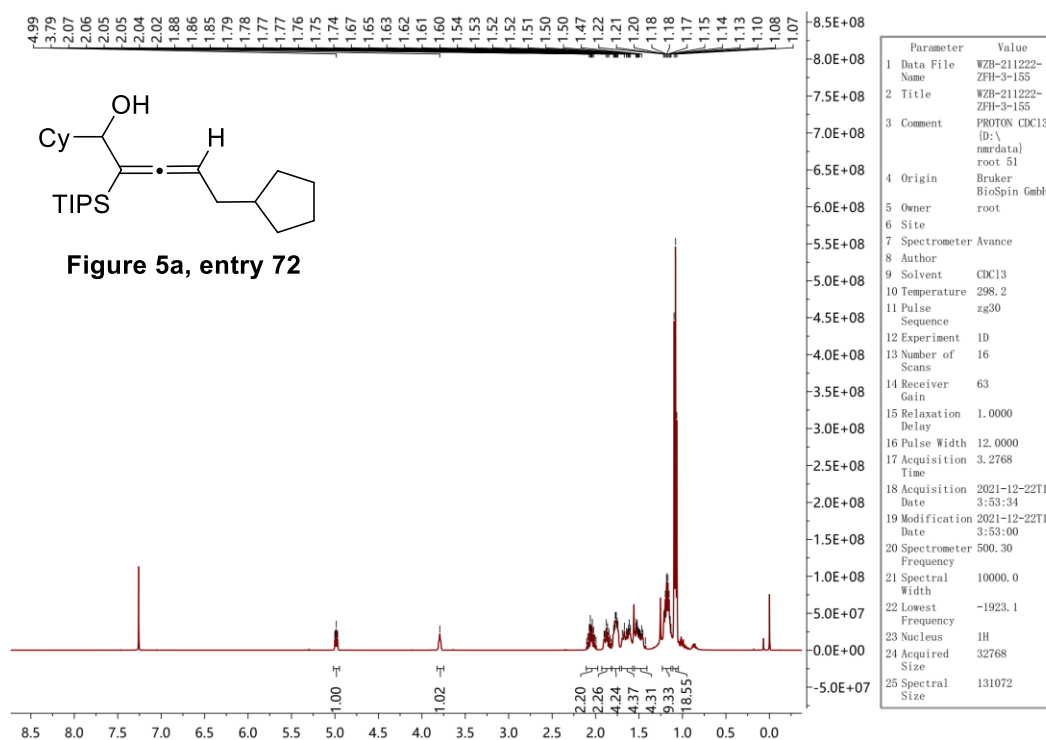

**Supplementary Figure 156.** <sup>1</sup>H NMR spectrum of compound 72

<sup>13</sup>C NMR (126 MHz, room temperature, CDCl<sub>3</sub>)

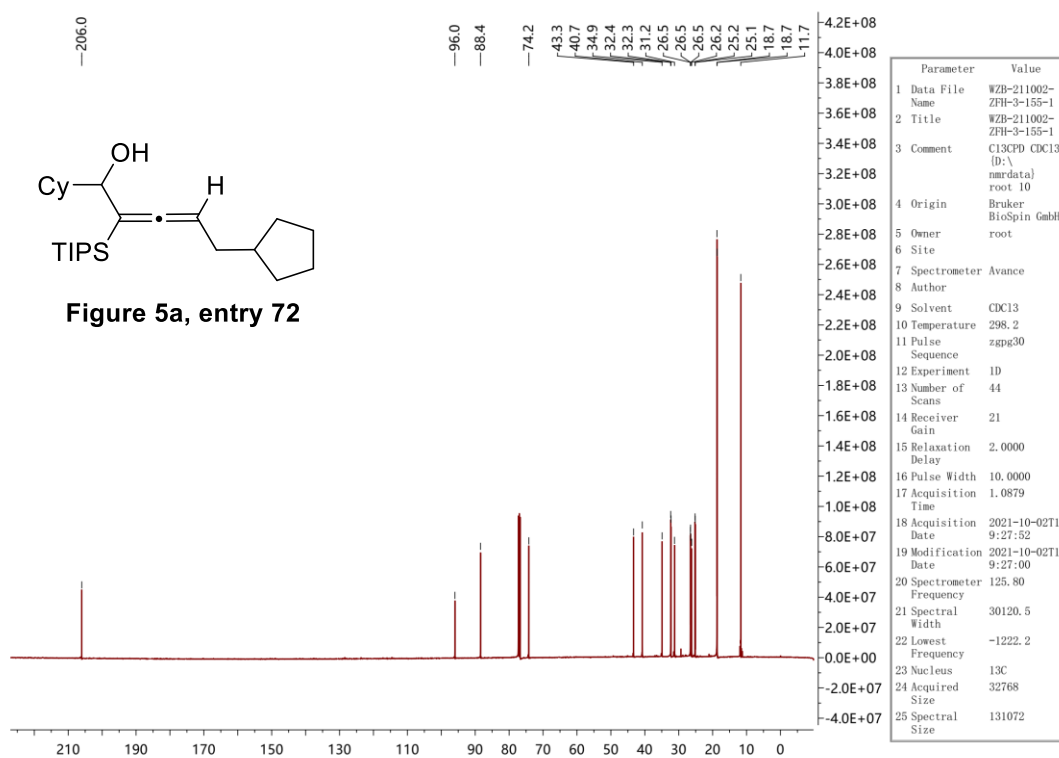

**Supplementary Figure 157.** <sup>13</sup>C NMR spectrum of compound 72

$^1\text{H}$  NMR (500 MHz, room temperature,  $\text{CDCl}_3$ )

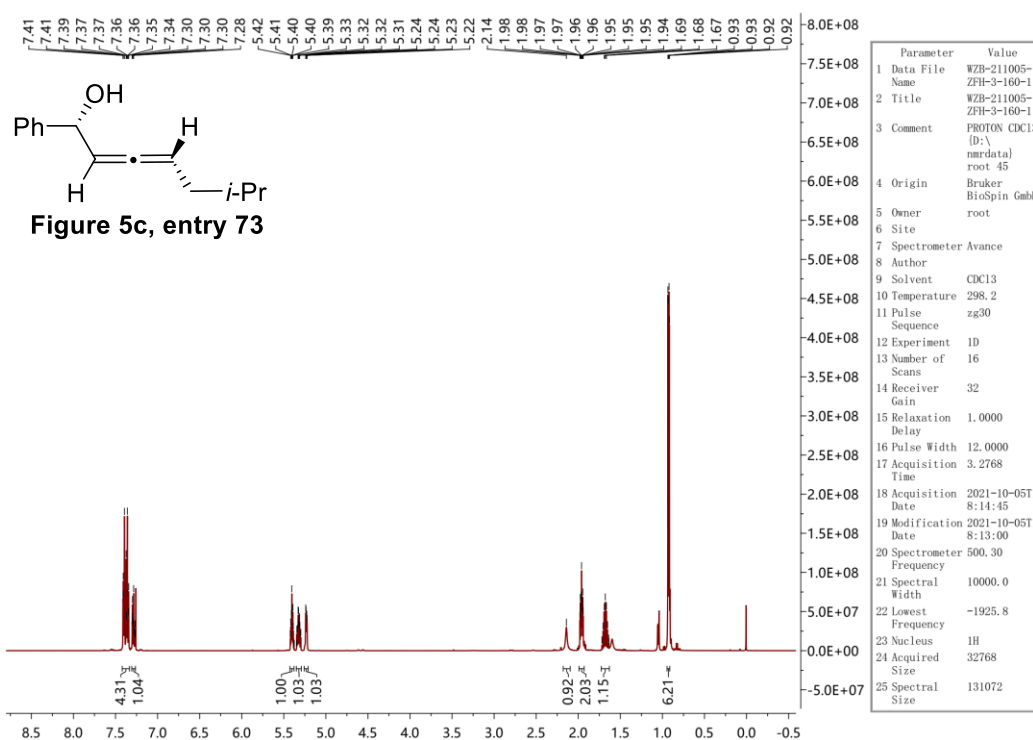

**Supplementary Figure 158.**  $^1\text{H}$  NMR spectrum of compound 73

$^{13}\text{C}$  NMR (126 MHz, room temperature,  $\text{CDCl}_3$ )

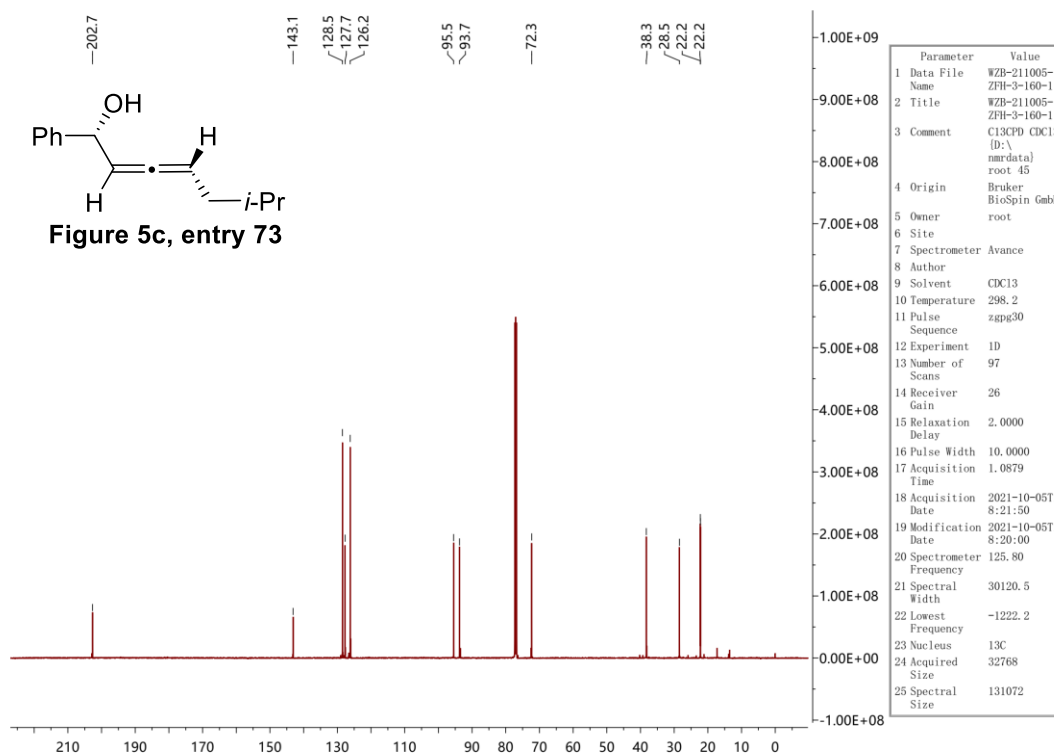

**Supplementary Figure 159.**  $^{13}\text{C}$  NMR spectrum of compound 73

$^1\text{H}$  NMR (500 MHz, room temperature,  $\text{CDCl}_3$ )

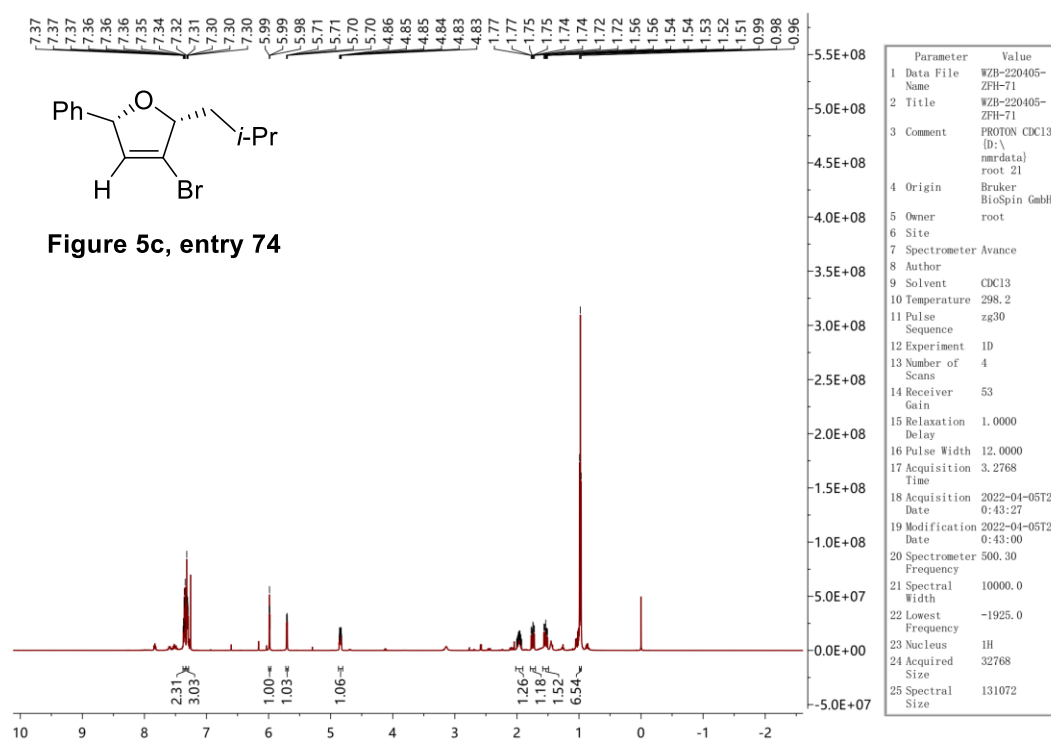

**Supplementary Figure 160.**  $^1\text{H}$  NMR spectrum of compound 74

$^{13}\text{C}$  NMR (126 MHz, room temperature,  $\text{CDCl}_3$ )

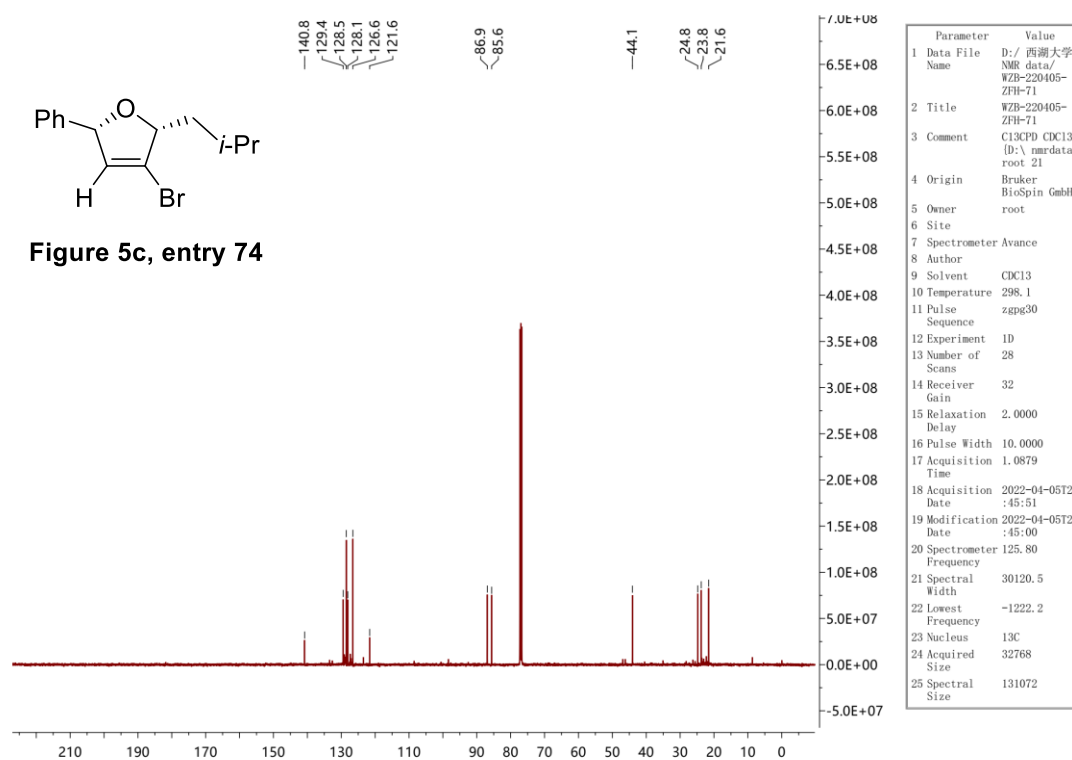

**Supplementary Figure 161.**  $^{13}\text{C}$  NMR spectrum of compound 74

<sup>1</sup>H NMR (500 MHz, room temperature, CDCl<sub>3</sub>)

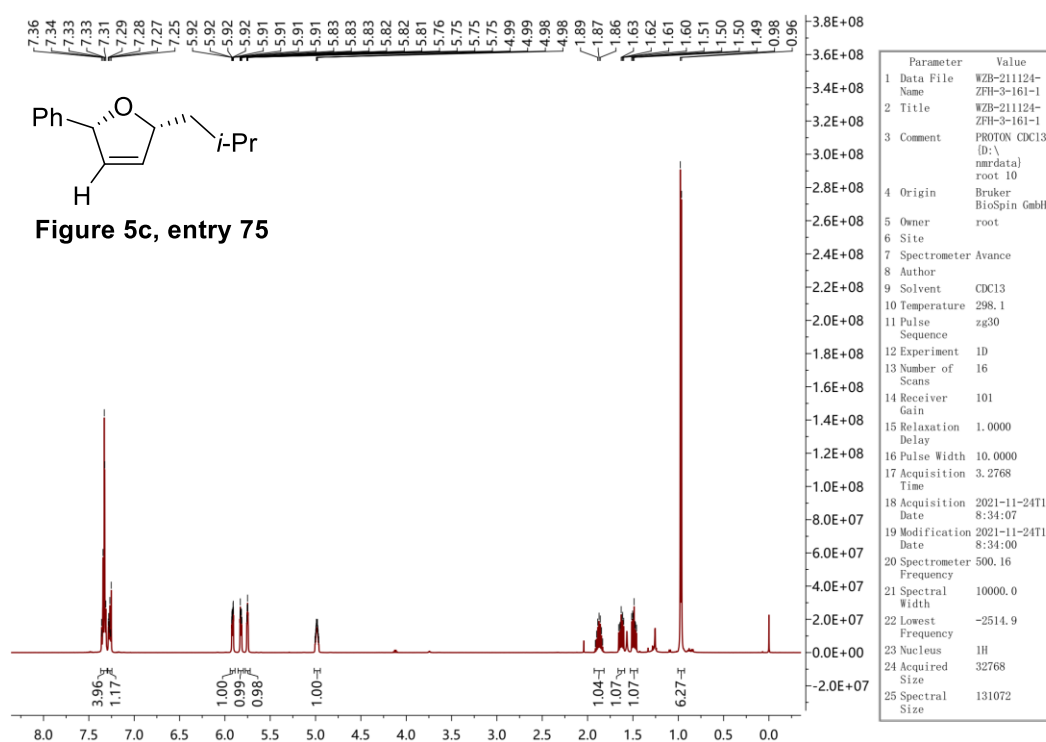

**Supplementary Figure 162.** <sup>1</sup>H NMR spectrum of compound 75

<sup>13</sup>C NMR (126 MHz, room temperature, CDCl<sub>3</sub>)

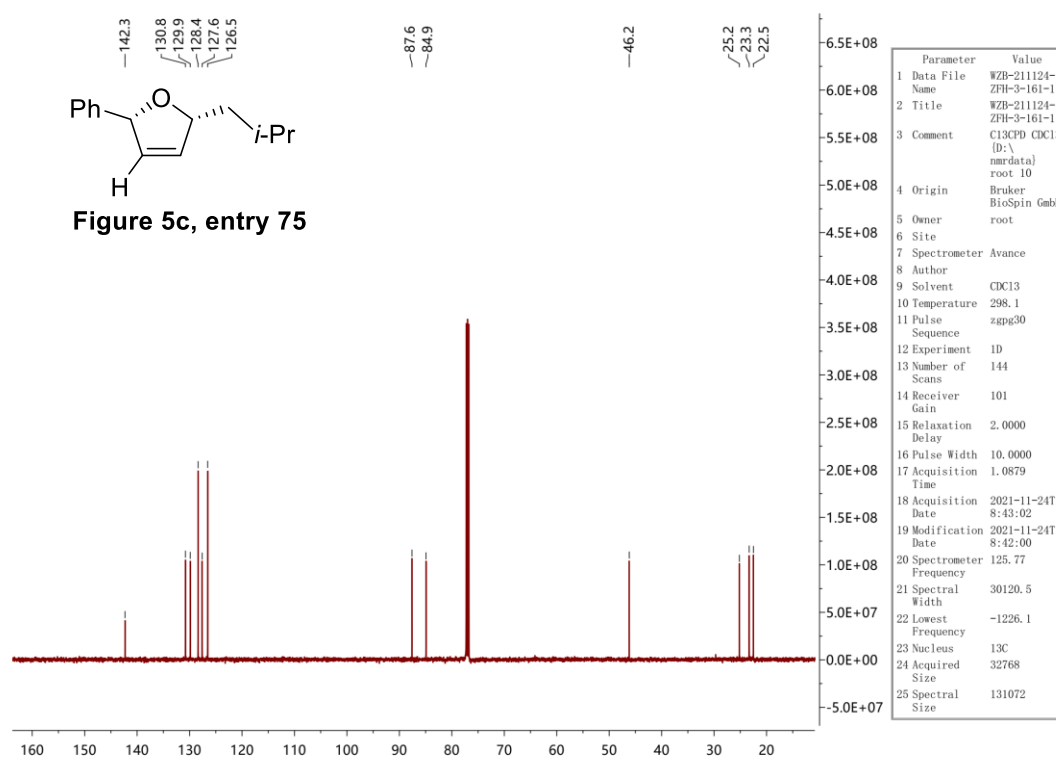

**Supplementary Figure 163.** <sup>13</sup>C NMR spectrum of compound 75

<sup>1</sup>H NMR (500 MHz, room temperature, CDCl<sub>3</sub>)

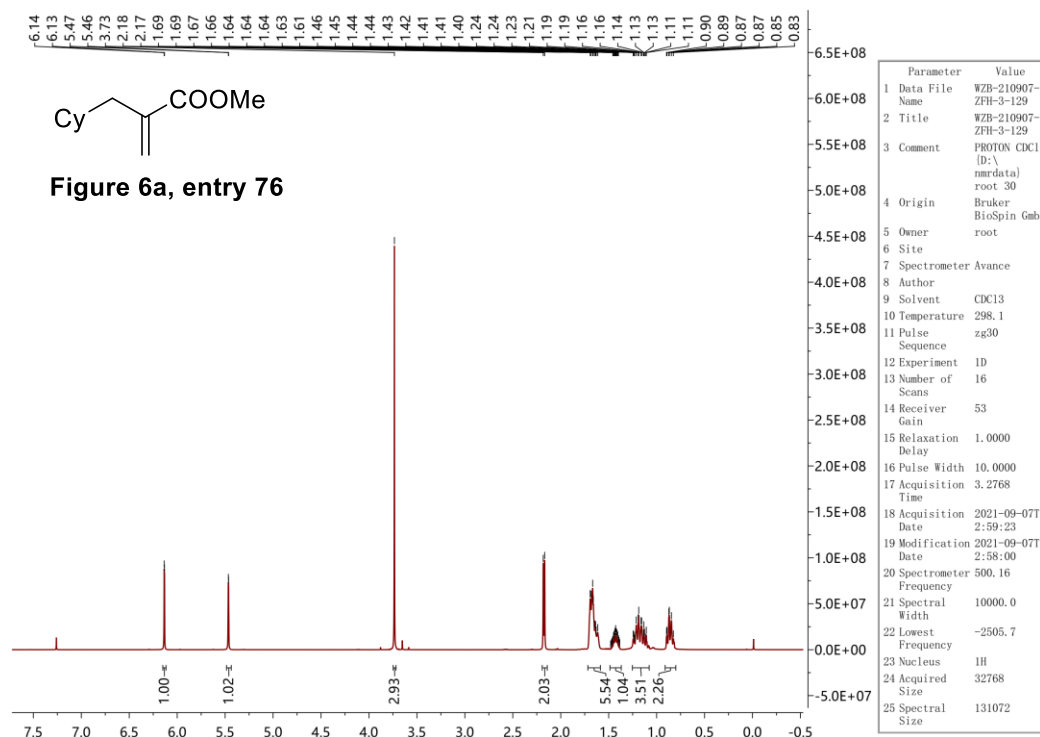

**Supplementary Figure 164.** <sup>1</sup>H NMR spectrum of compound 76

<sup>13</sup>C NMR (126 MHz, room temperature, CDCl<sub>3</sub>)

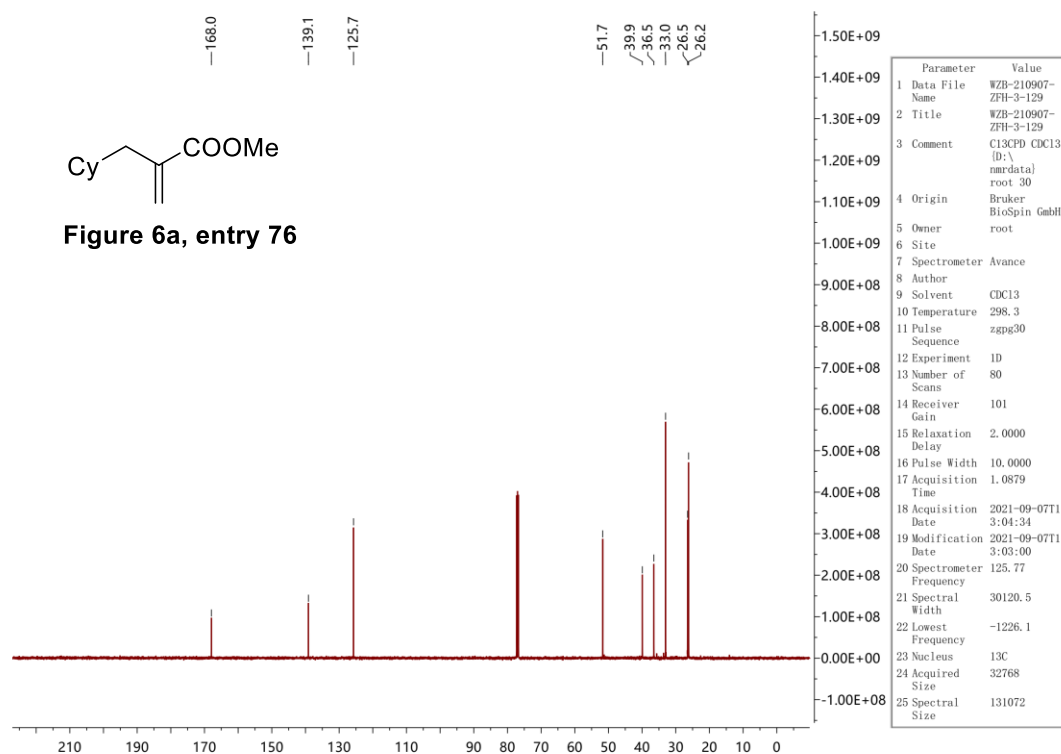

**Supplementary Figure 165.** <sup>13</sup>C NMR spectrum of compound 76

## 1.9 Stereoselectivity Analysis

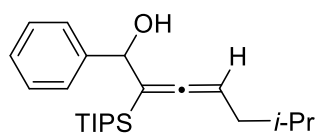

**Figure 3, entry 3**

(*R,S*)-L1: 95% ee; (*S,R*)-L1: 94% ee

Auto-Scaled Chromatogram

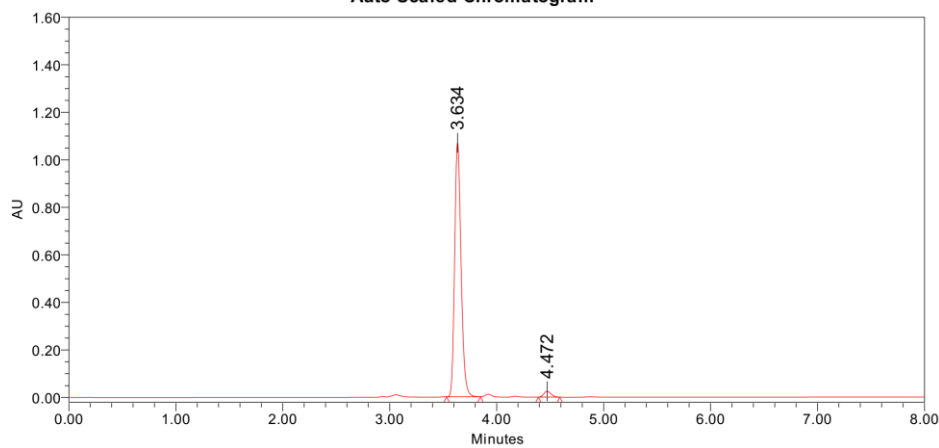

Peak Results

| Name | RT    | Area    | Height  | % Area |
|------|-------|---------|---------|--------|
| 1    | 3.634 | 4469601 | 1068964 | 97.46  |
| 2    | 4.472 | 116721  | 24542   | 2.54   |

**Supplementary Figure 166.** HPLC Spectra of **3** obtained from (*R,S*)-L1.

Auto-Scaled Chromatogram

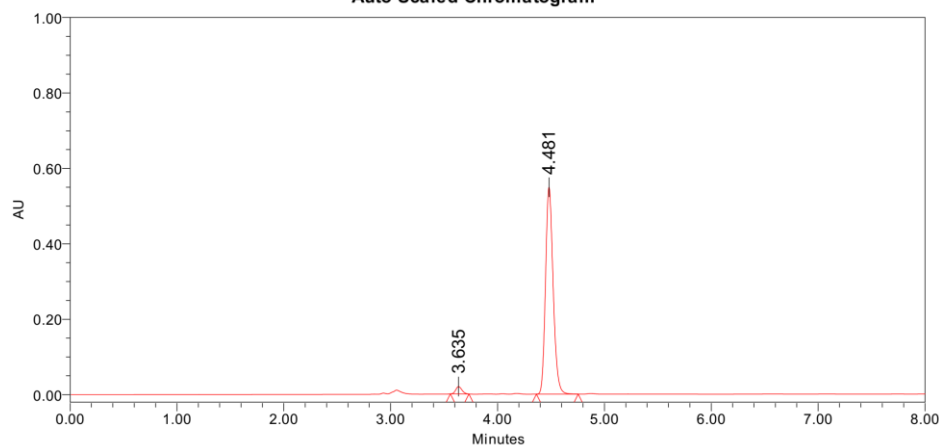

Peak Results

| Name | RT    | Area    | Height | % Area |
|------|-------|---------|--------|--------|
| 1    | 3.635 | 78422   | 19526  | 2.80   |
| 2    | 4.481 | 2718060 | 548587 | 97.20  |

**Supplementary Figure 167.** HPLC Spectra of **3** obtained from (*S,R*)-L1.

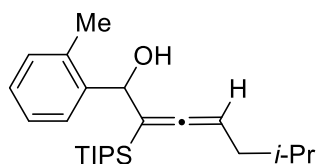

**Figure 3, entry 4**  
 (*R,S*)-L1: 96% ee; (*S,R*)-L1: 97% ee

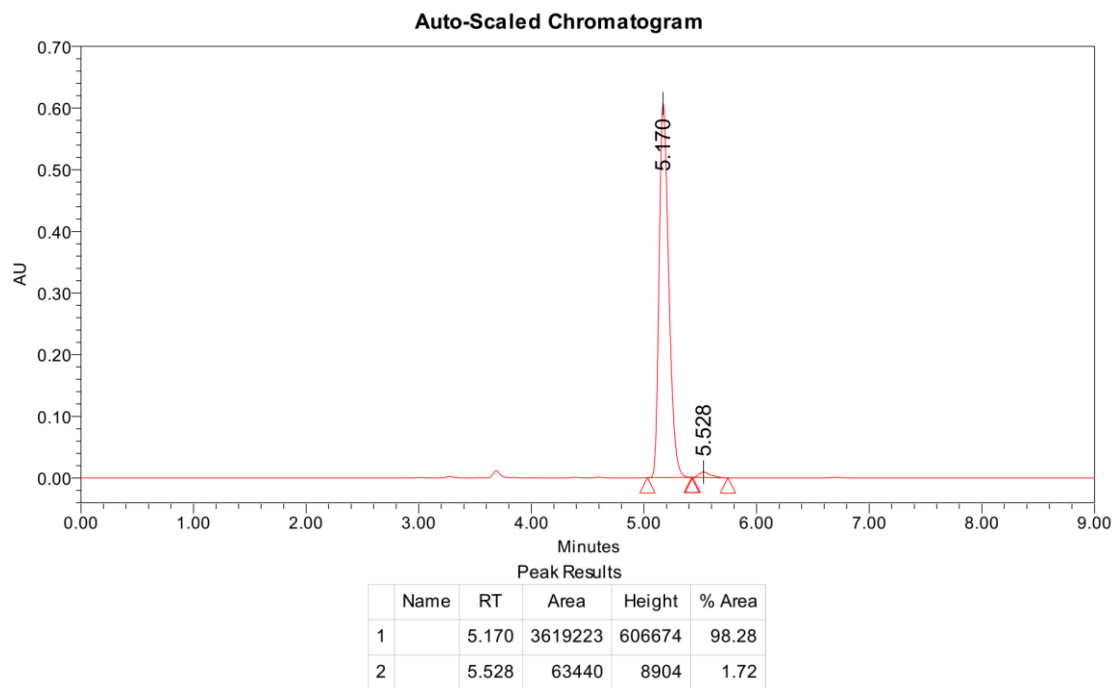

**Supplementary Figure 168. HPLC Spectra of 4 obtained from (*R,S*)-L1.**  
**Auto-Scaled Chromatogram**

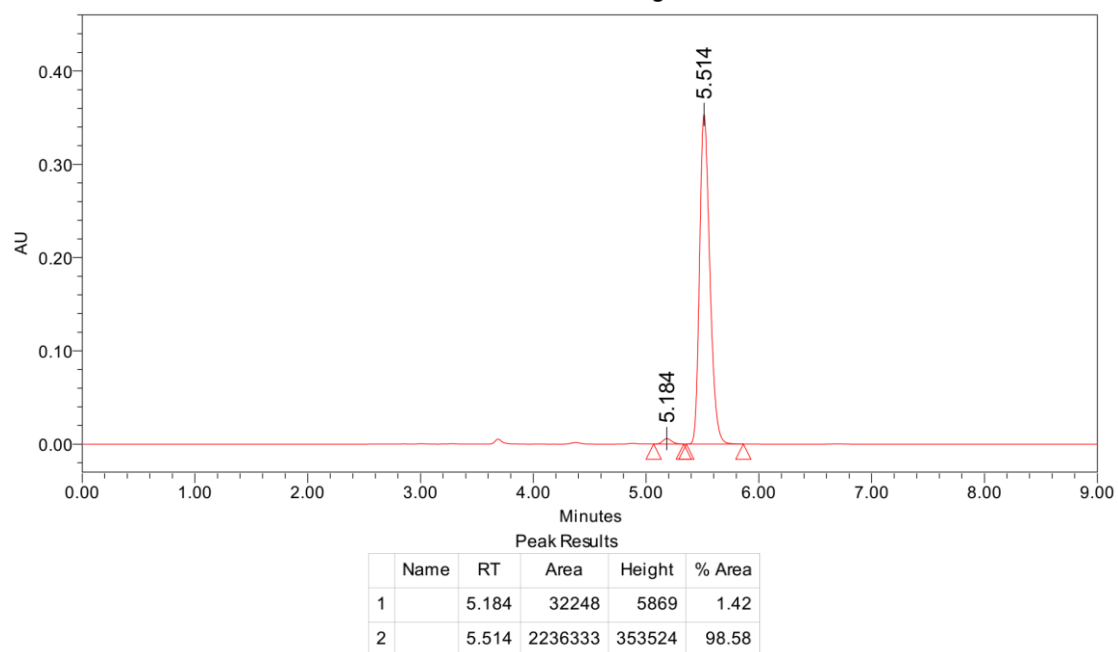

**Supplementary Figure 169. HPLC Spectra of 4 obtained from (*S,R*)-L1.**

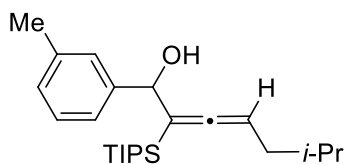

**Figure 3, entry 5**  
 (*R,S*)-L1: 93% ee; (*S,R*)-L1: 93% ee  
 Auto-Scaled Chromatogram

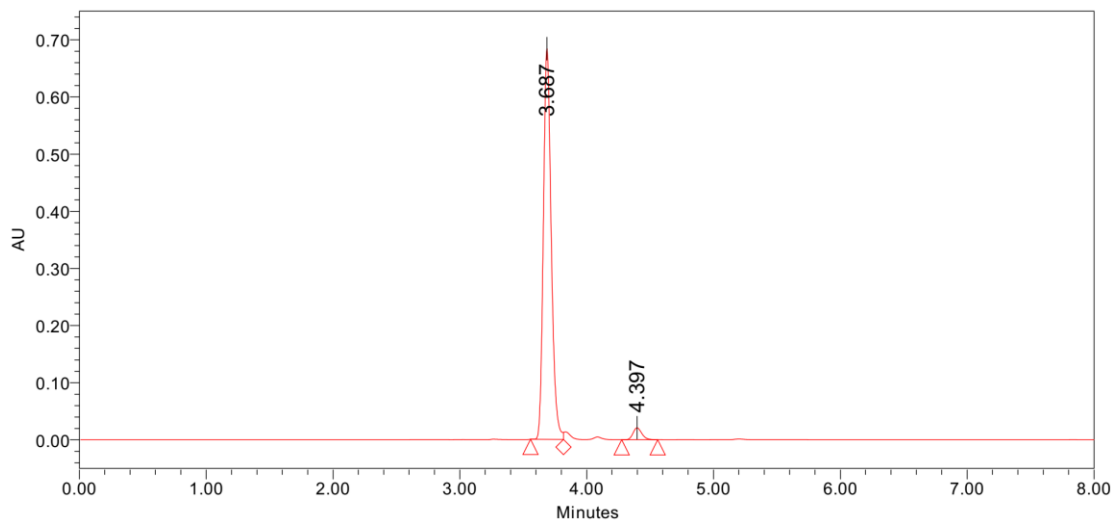

Peak Results

| Name | RT    | Area    | Height | % Area |
|------|-------|---------|--------|--------|
| 1    | 3.687 | 2935493 | 683639 | 96.64  |
| 2    | 4.397 | 101924  | 21021  | 3.36   |

**Supplementary Figure 170.** HPLC Spectra of **5** obtained from (*R,S*)-L1.  
 Auto-Scaled Chromatogram

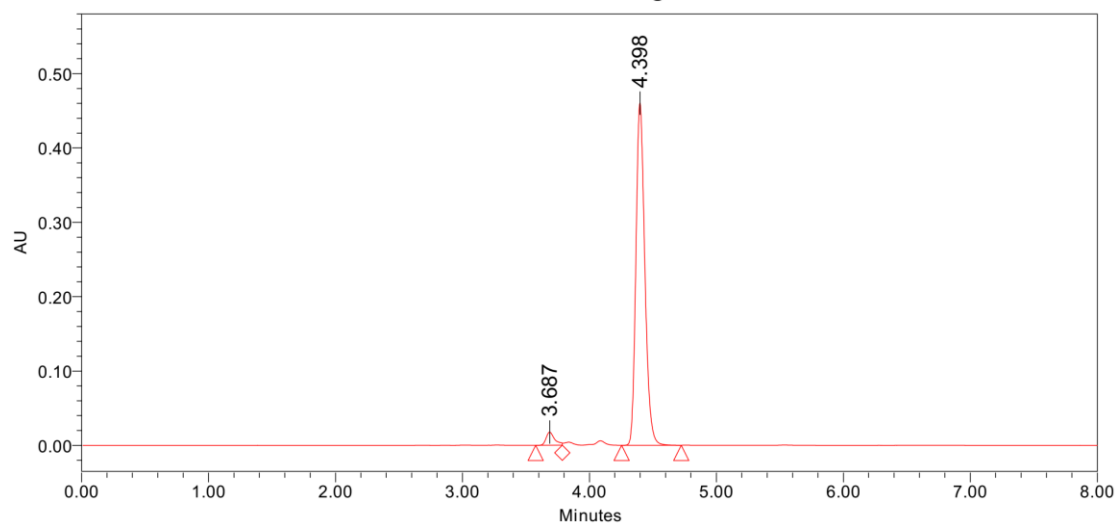

Peak Results

| Name | RT    | Area    | Height | % Area |
|------|-------|---------|--------|--------|
| 1    | 3.687 | 82595   | 17699  | 3.54   |
| 2    | 4.398 | 2248771 | 460452 | 96.46  |

**Supplementary Figure 171.** HPLC Spectra of **5** obtained from (*S,R*)-L1.



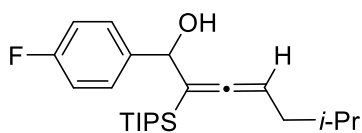

**Figure 3, entry 6**  
 (*R,S*)-L1: 93% ee; (*S,R*)-L1: 92% ee

**Auto-Scaled Chromatogram**

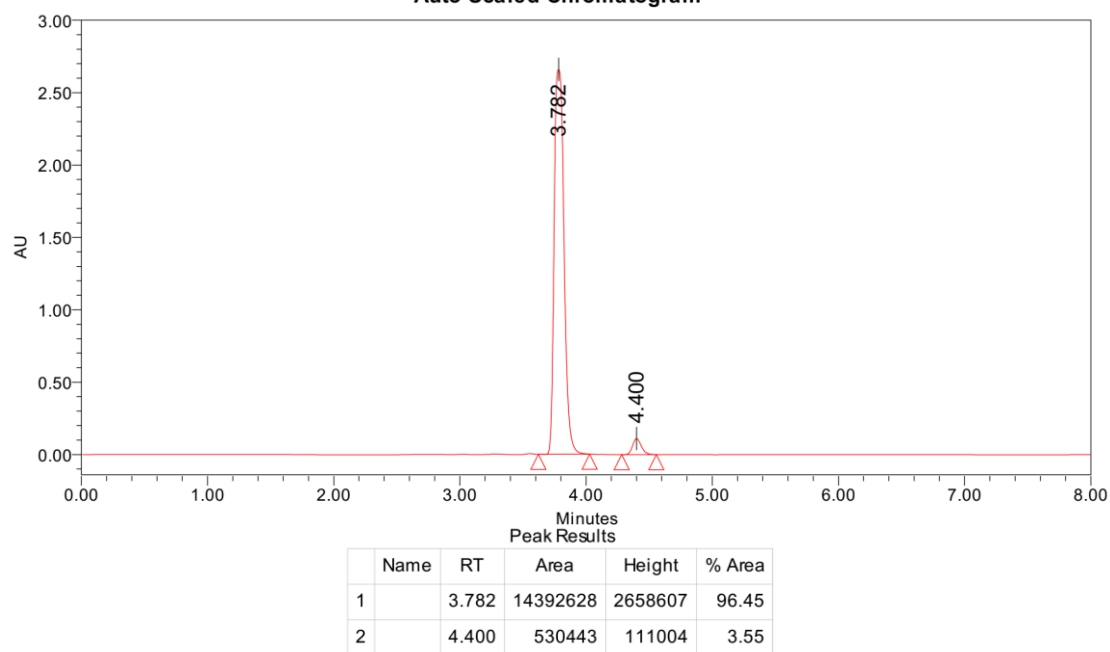

**Supplementary Figure 172.** HPLC Spectra of **6** obtained from (*R,S*)-L1.

**Auto-Scaled Chromatogram**

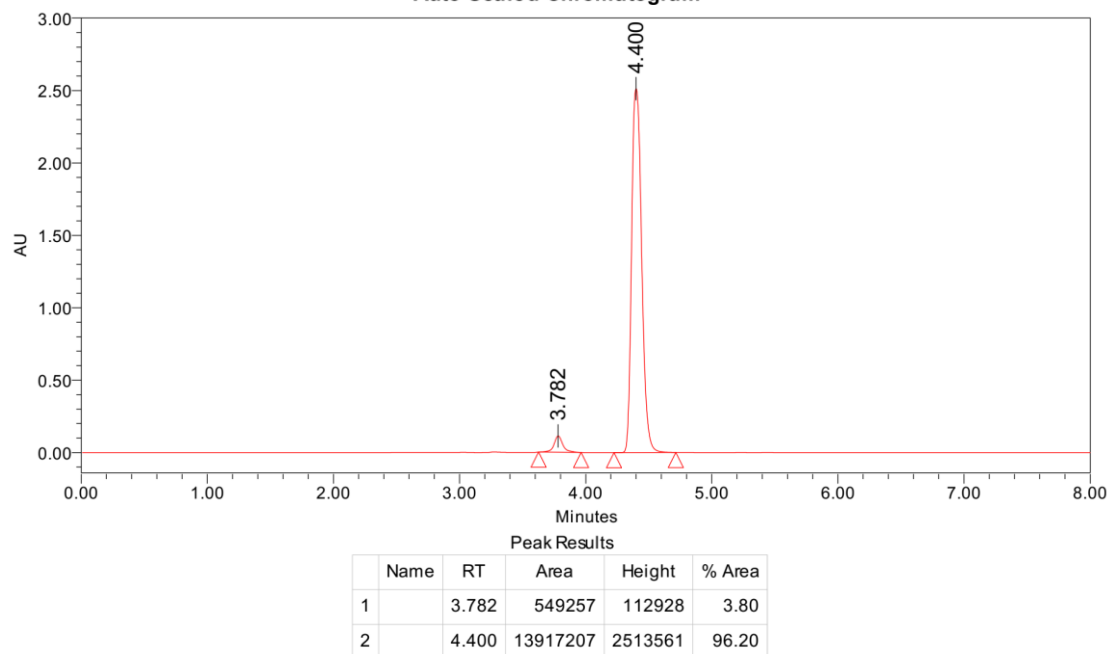

**Supplementary Figure 173.** HPLC Spectra of **6** obtained from (*S,R*)-L1.

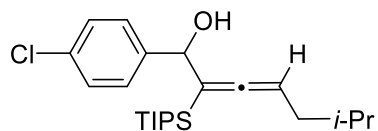

**Figure 3, entry 7**  
 (*R,S*)-L1: 91% ee; (*S,R*)-L1: 93% ee

**Auto-Scaled Chromatogram**

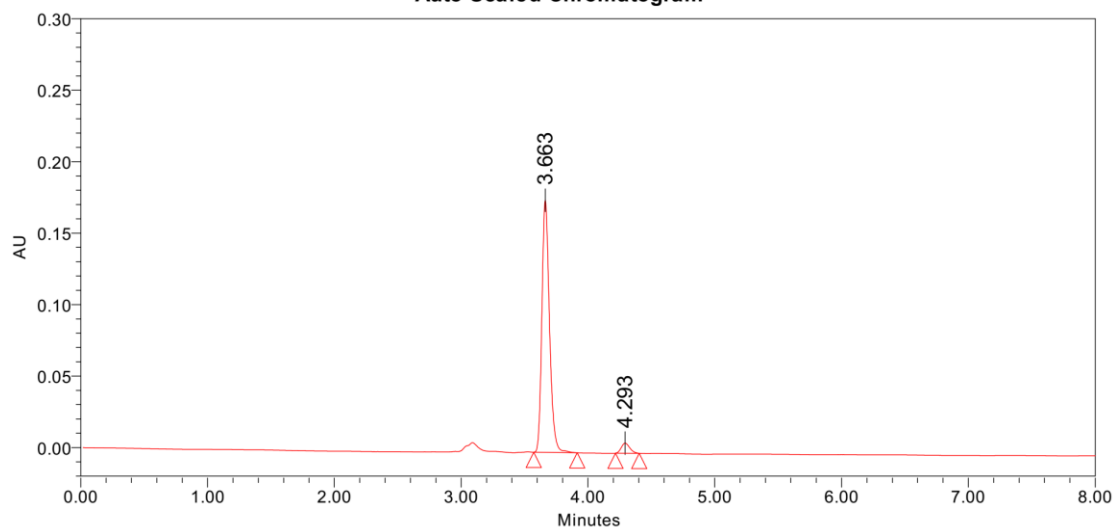

Peak Results

| Name | RT    | Area   | Height | % Area |
|------|-------|--------|--------|--------|
| 1    | 3.663 | 732845 | 176387 | 95.74  |
| 2    | 4.293 | 32602  | 7094   | 4.26   |

**Supplementary Figure 174. HPLC Spectra of 7 obtained from (*R,S*)-L1.**

**Auto-Scaled Chromatogram**

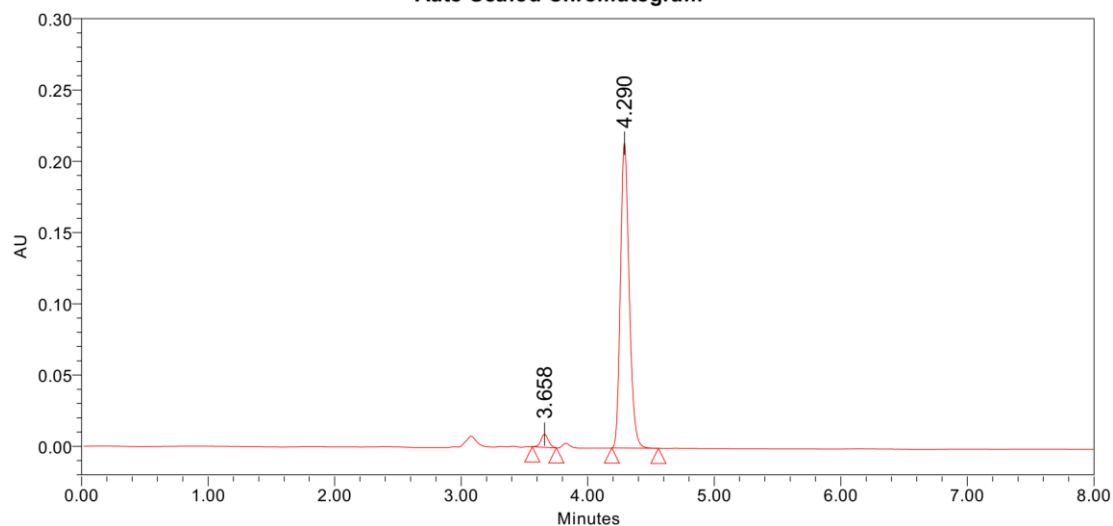

Peak Results

| Name | RT    | Area    | Height | % Area |
|------|-------|---------|--------|--------|
| 1    | 3.658 | 37792   | 9206   | 3.54   |
| 2    | 4.290 | 1030671 | 214053 | 96.46  |

**Supplementary Figure 175. HPLC Spectra of 7 obtained from (*S,R*)-L1.**

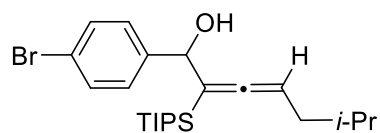

**Figure 3, entry 8**  
 (*R,S*)-L1: 93% ee; (*S,R*)-L1: 92% ee  
**Auto-Scaled Chromatogram**

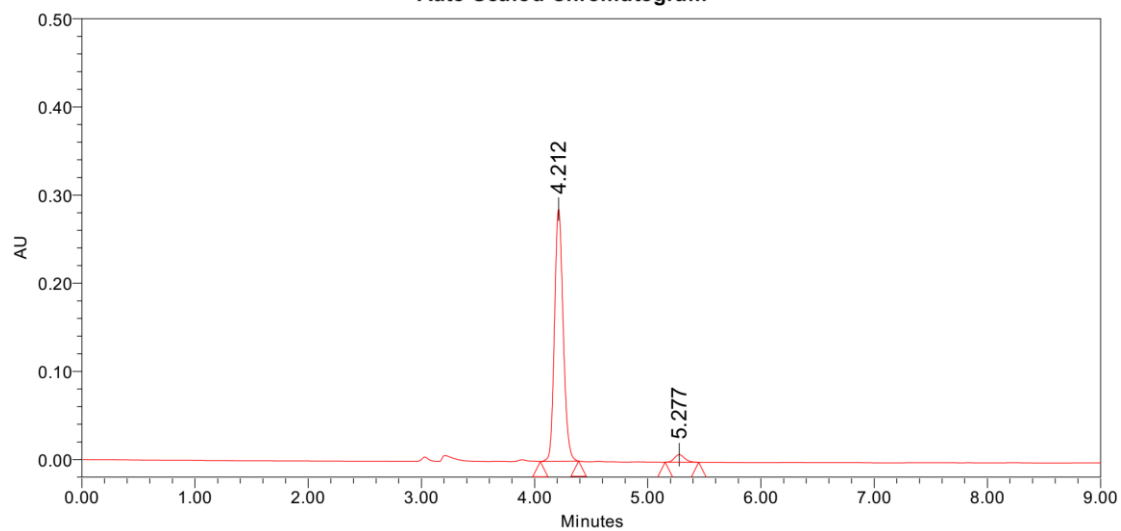

Peak Results

| Name | RT    | Area    | Height | % Area |
|------|-------|---------|--------|--------|
| 1    | 4.212 | 1524001 | 286173 | 96.63  |
| 2    | 5.277 | 53169   | 8560   | 3.37   |

**Supplementary Figure 176. HPLC Spectra of 8 obtained from (*R,S*)-L1.**  
**Auto-Scaled Chromatogram**

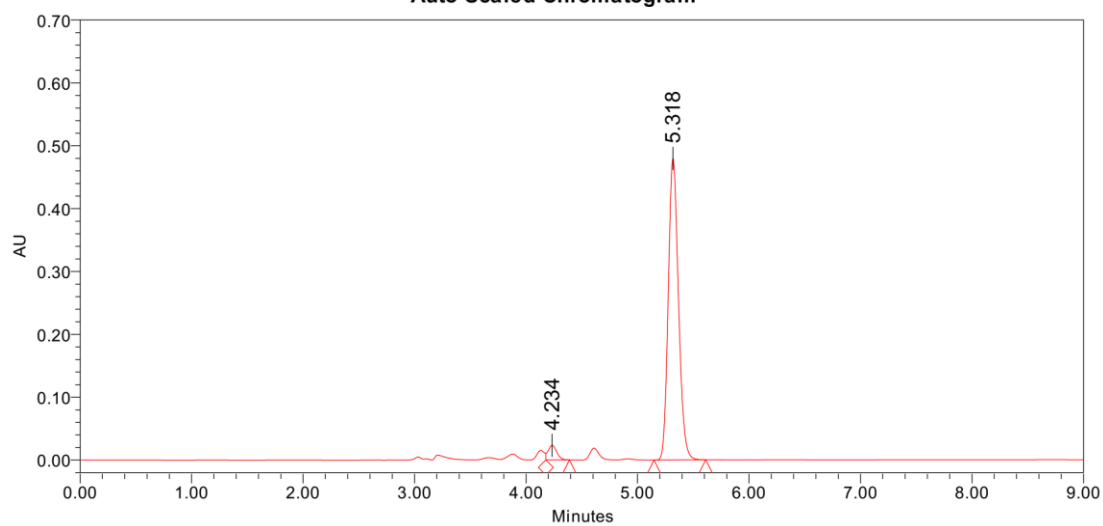

Peak Results

| Name | RT    | Area    | Height | % Area |
|------|-------|---------|--------|--------|
| 1    | 4.234 | 126691  | 23230  | 3.99   |
| 2    | 5.318 | 3048872 | 479821 | 96.01  |

**Supplementary Figure 177. HPLC Spectra of 8 obtained from (*S,R*)-L1.**

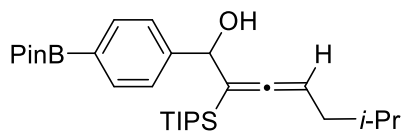

**Figure 3, entry 9**  
 (*R,S*)-L1: 96% ee; (*S,R*)-L1: 95% ee  
 Auto-Scaled Chromatogram

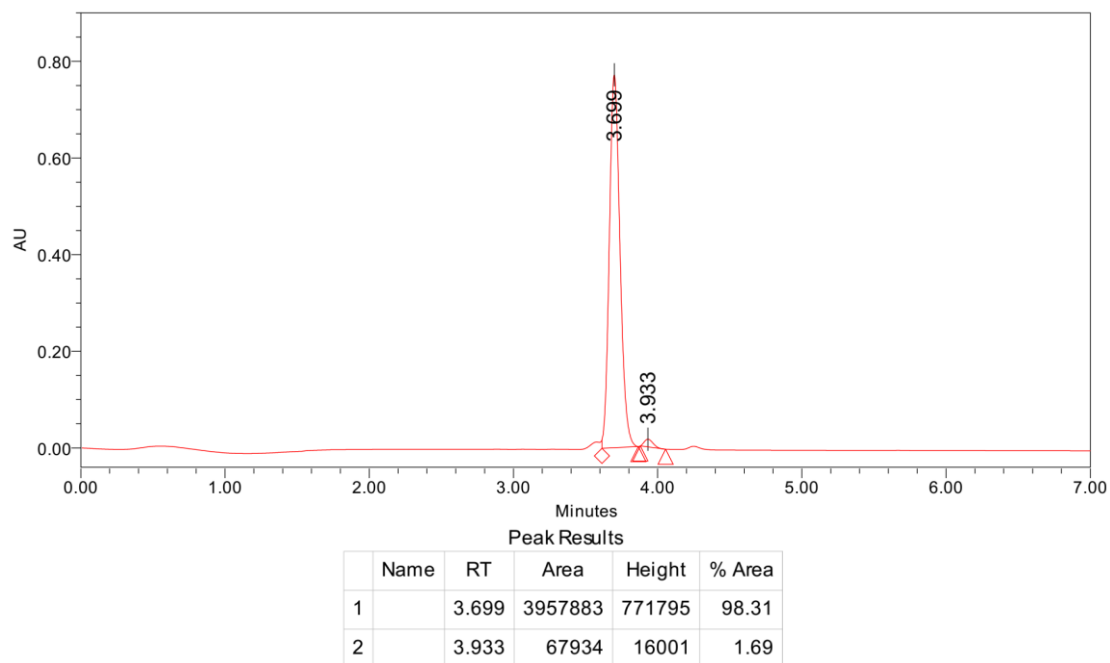

**Supplementary Figure 178.** HPLC Spectra of **9** obtained from (*R,S*)-L1.  
 Auto-Scaled Chromatogram

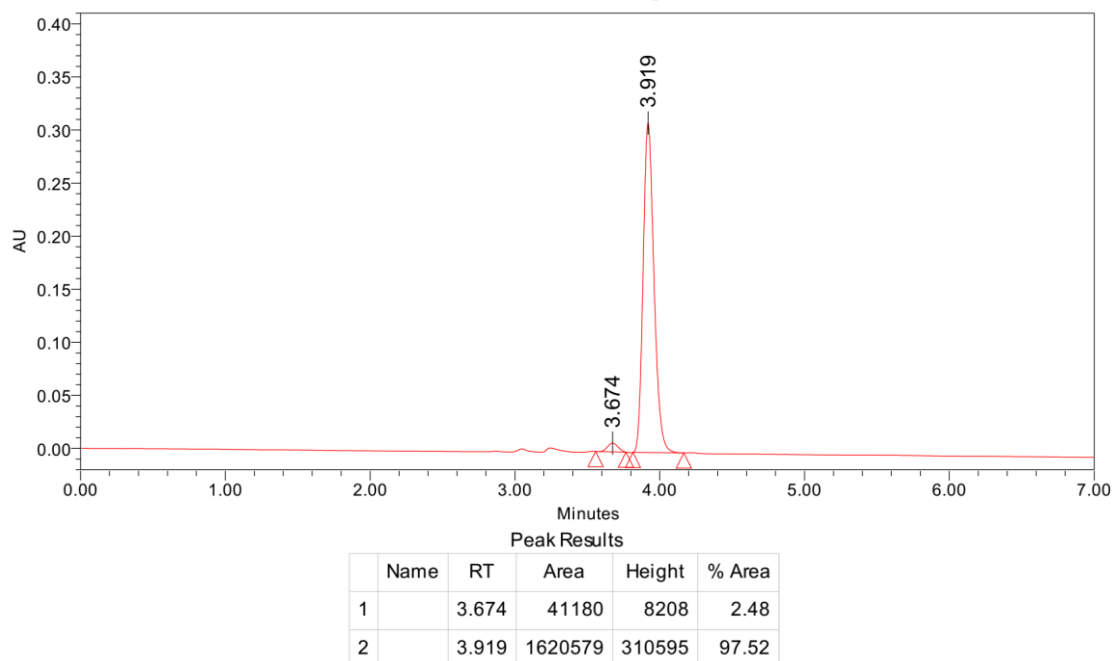

**Supplementary Figure 179.** HPLC Spectra of **9** obtained from (*S,R*)-L1.

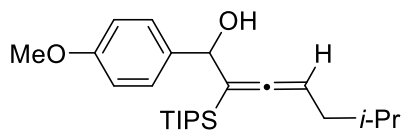

**Figure 3, entry 10**  
*(R,S)*-L1: 95% ee; *(S,R)*-L1: 95% ee

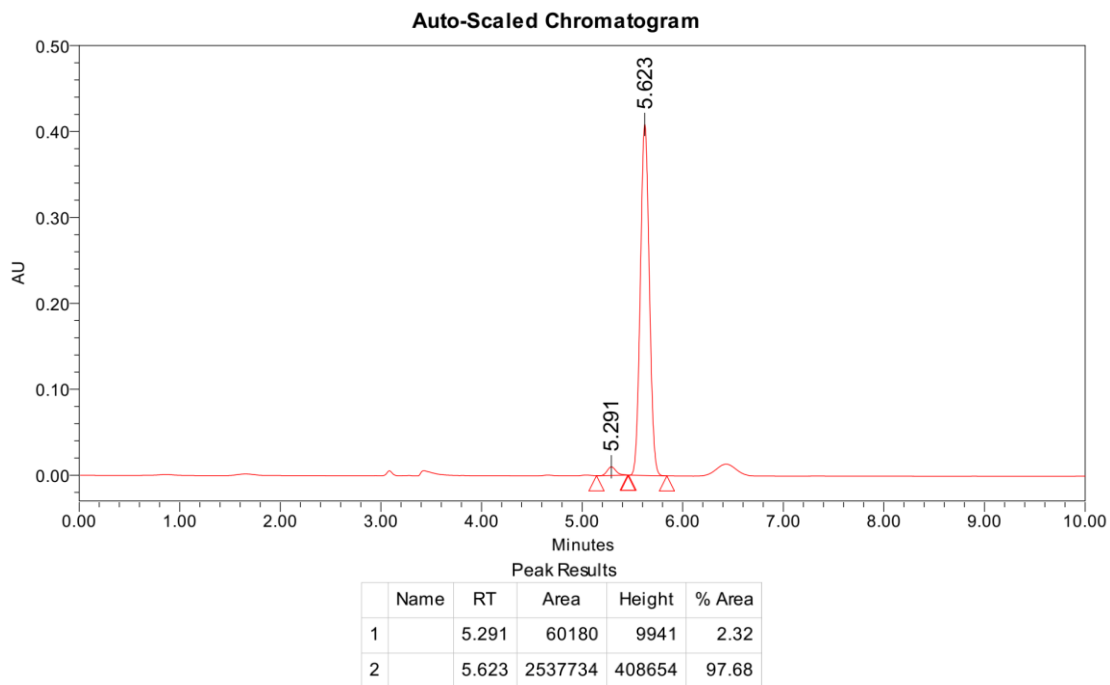

**Supplementary Figure 180.** HPLC Spectra of **10** obtained from *(R,S)*-L1.  
**Auto-Scaled Chromatogram**

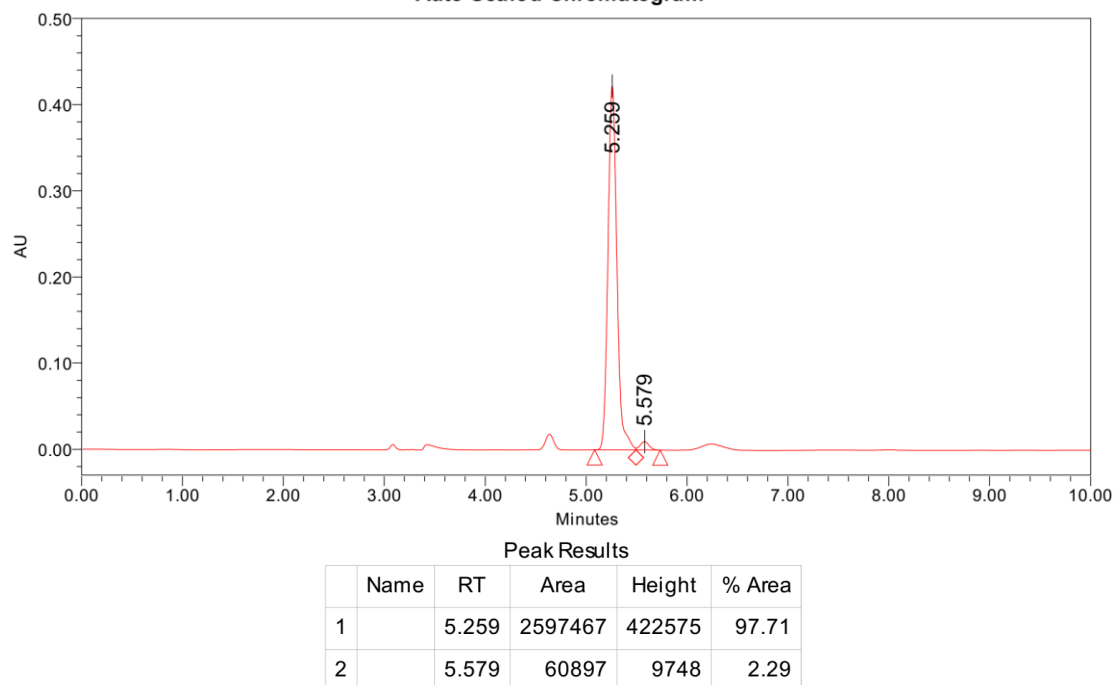

**Supplementary Figure 181.** HPLC Spectra of **10** obtained from *(S,R)*-L1.

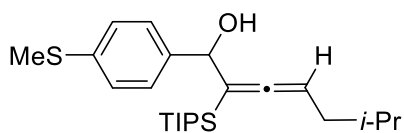

**Figure 3, entry 11**  
 (*R,S*)-L1: 95% ee; (*S,R*)-L1: 94% ee

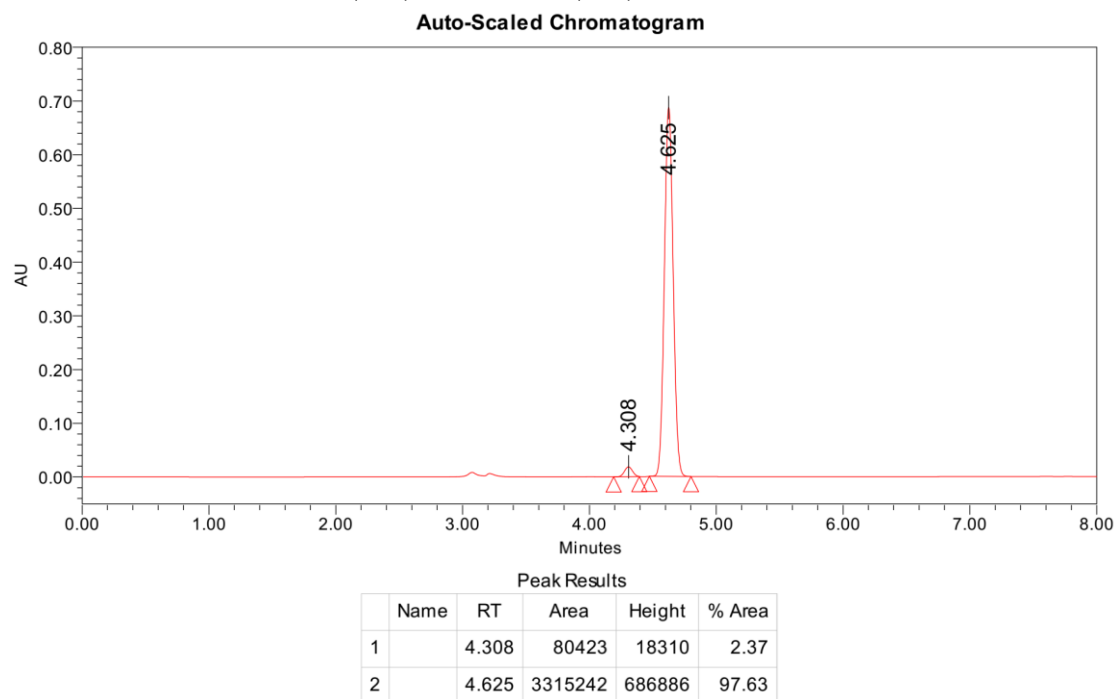

**Supplementary Figure 182. HPLC Spectra of 11 obtained from (*R,S*)-L1.**  
**Auto-Scaled Chromatogram**

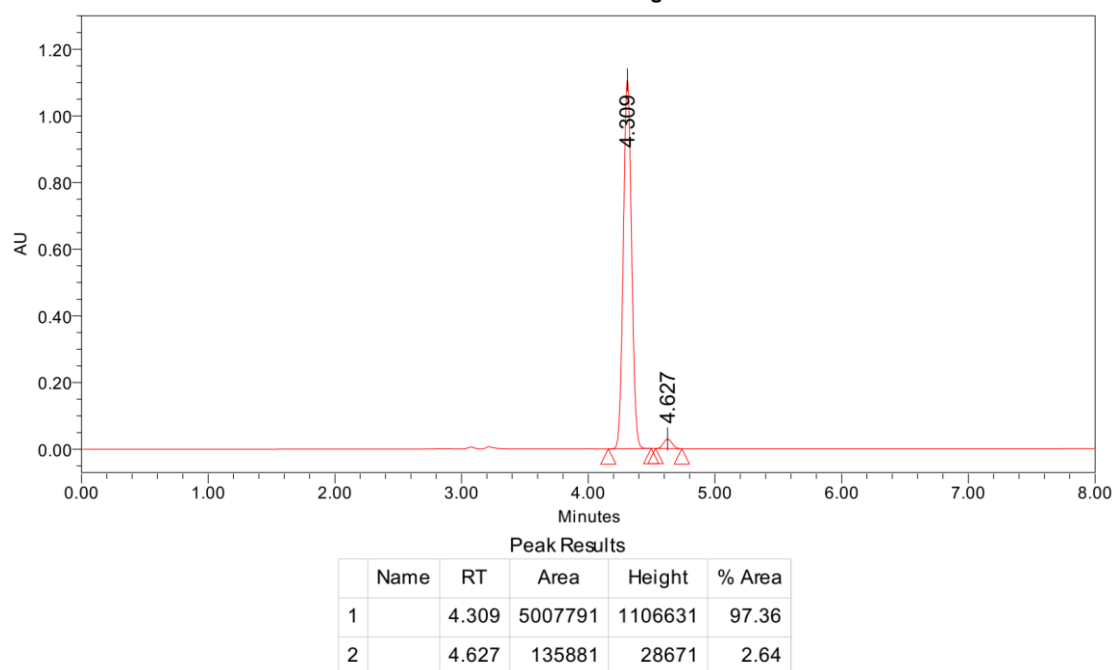

**Supplementary Figure 183. HPLC Spectra of 11 obtained from (*S,R*)-L1.**

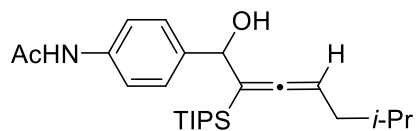

**Figure 3, entry 12**  
*(R,S)*-L1: 94% ee; *(S,R)*-L1: 94% ee

**Auto-Scaled Chromatogram**

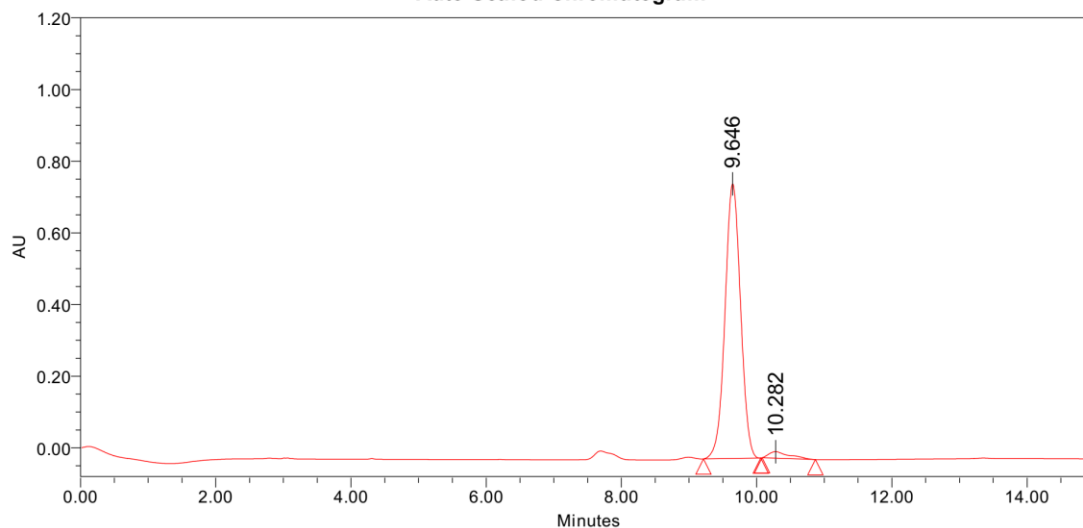

**Peak Results**

| Name | RT     | Area     | Height | % Area |
|------|--------|----------|--------|--------|
| 1    | 9.646  | 12240010 | 766394 | 96.90  |
| 2    | 10.282 | 391481   | 18079  | 3.10   |

**Supplementary Figure 184.** HPLC Spectra of **12** obtained from *(R,S)*-L1.

**Auto-Scaled Chromatogram**

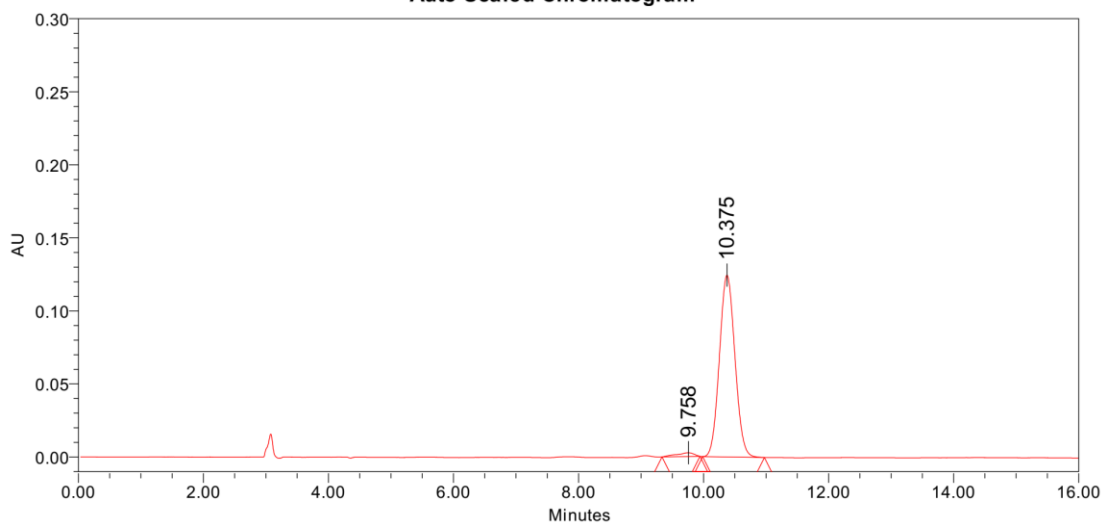

**Peak Results**

| Name | RT     | Area    | Height | % Area |
|------|--------|---------|--------|--------|
| 1    | 9.758  | 49220   | 2534   | 2.24   |
| 2    | 10.375 | 2144482 | 124422 | 97.76  |

**Supplementary Figure 185.** HPLC Spectra of **12** obtained from *(S,R)*-L1.

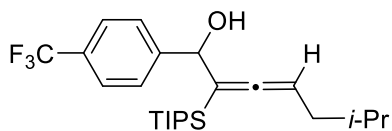

**Figure 3, entry 13**  
 (*R,S*)-L1: 94% ee; (*S,R*)-L1: 94% ee  
**Auto-Scaled Chromatogram**

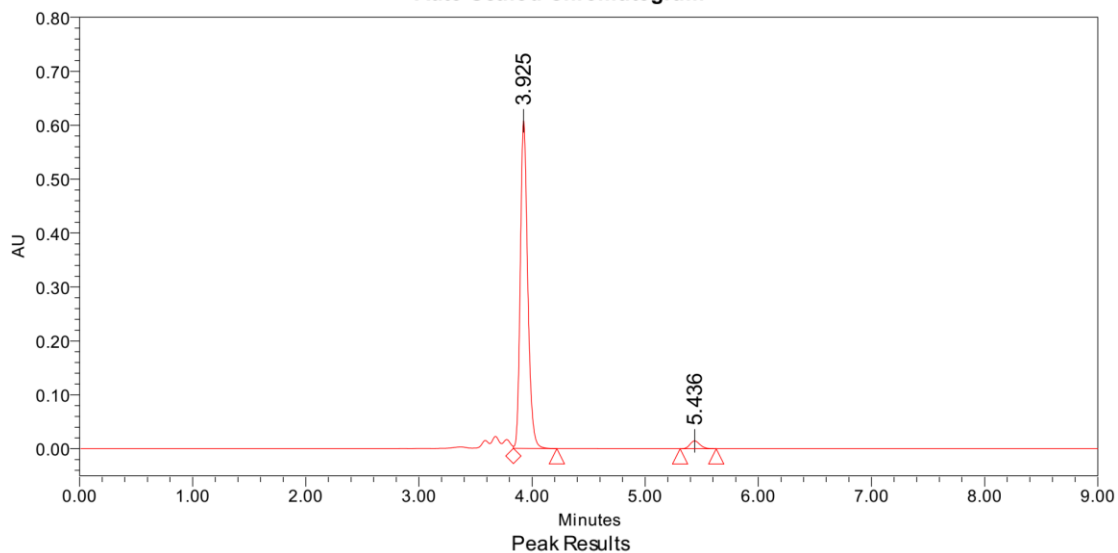

| Peak Results |       |         |        |        |
|--------------|-------|---------|--------|--------|
| Name         | RT    | Area    | Height | % Area |
| 1            | 3.925 | 2762210 | 607758 | 96.85  |
| 2            | 5.436 | 89911   | 14630  | 3.15   |

**Supplementary Figure 186. HPLC Spectra of 13 obtained from (*R,S*)-L1.**

**Auto-Scaled Chromatogram**

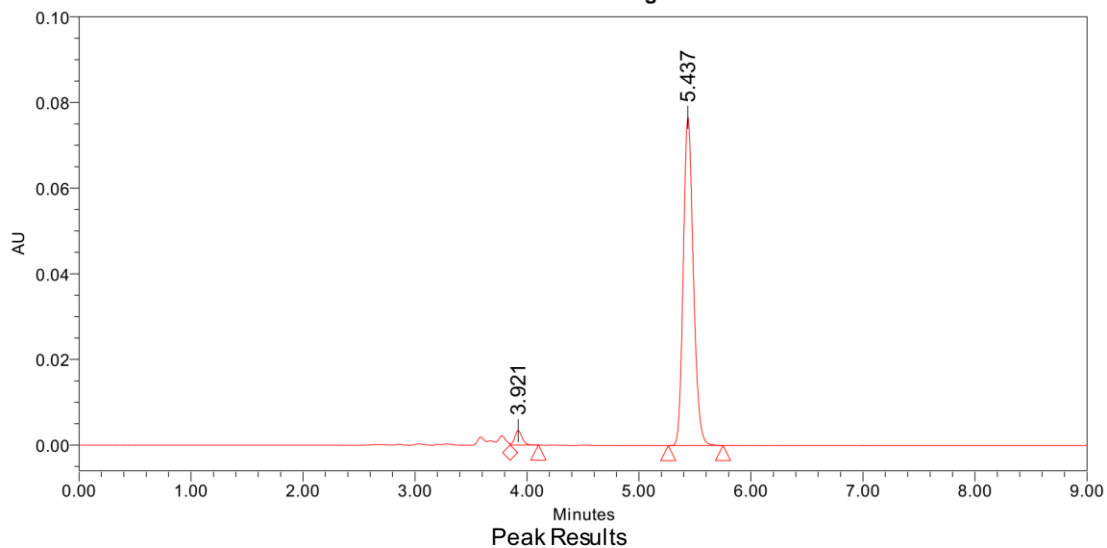

| Peak Results |       |        |        |        |
|--------------|-------|--------|--------|--------|
| Name         | RT    | Area   | Height | % Area |
| 1            | 3.921 | 15469  | 3396   | 3.12   |
| 2            | 5.437 | 479948 | 76658  | 96.88  |

**Supplementary Figure 187. HPLC Spectra of 13 obtained from (*S,R*)-L1.**



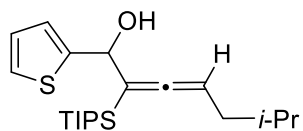

**Figure 3, entry 14**  
*(R,S)*-L1: 97% ee; *(S,R)*-L1: 97% ee  
**Auto-Scaled Chromatogram**

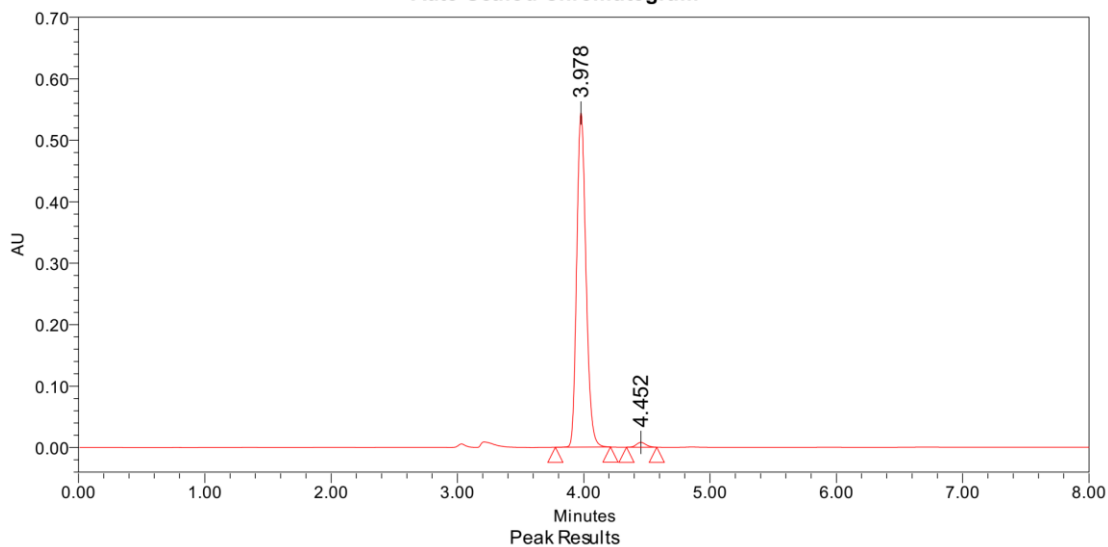

| Peak Results |       |         |        |        |
|--------------|-------|---------|--------|--------|
| Name         | RT    | Area    | Height | % Area |
| 1            | 3.978 | 2778864 | 543773 | 98.55  |
| 2            | 4.452 | 40983   | 7853   | 1.45   |

**Supplementary Figure 188. HPLC Spectra of 14 obtained from *(R,S)*-L1.**  
**Auto-Scaled Chromatogram**

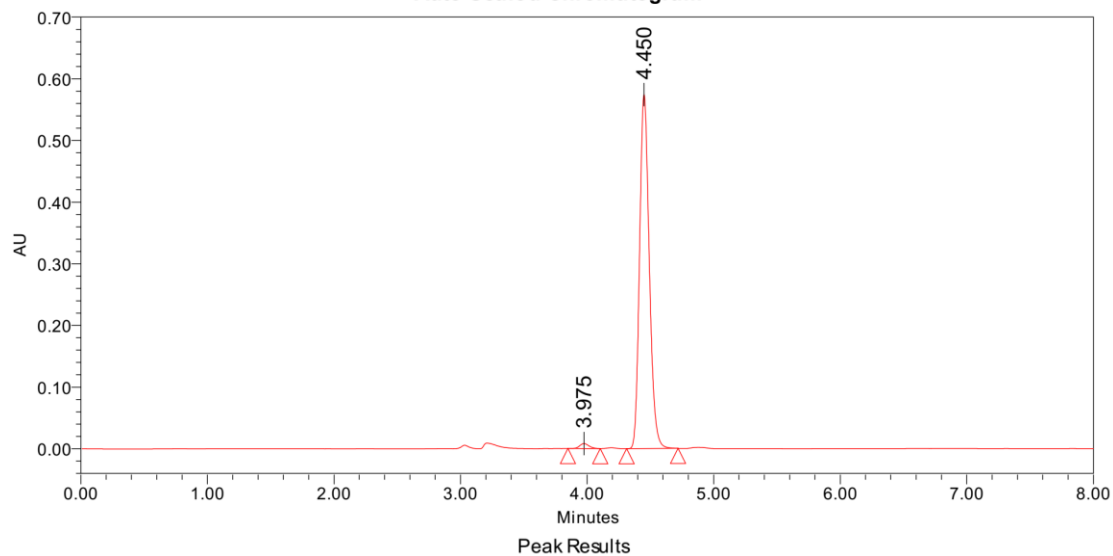

| Peak Results |       |         |        |        |
|--------------|-------|---------|--------|--------|
| Name         | RT    | Area    | Height | % Area |
| 1            | 3.975 | 39695   | 7897   | 1.28   |
| 2            | 4.450 | 3060442 | 574237 | 98.72  |

**Supplementary Figure 189. HPLC Spectra of 14 obtained from *(S,R)*-L1.**

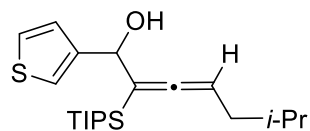

**Figure 3, entry 15**  
 (*R,S*)-L1: 95% ee; (*S,R*)-L1: 95% ee  
 Auto-Scaled Chromatogram

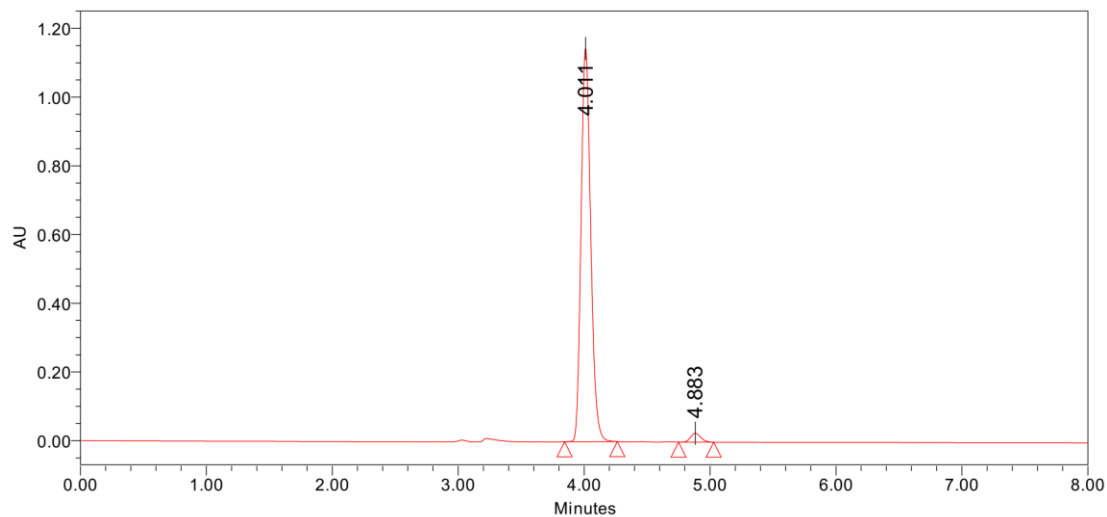

Peak Results

| Name | RT    | Area    | Height  | % Area |
|------|-------|---------|---------|--------|
| 1    | 4.011 | 6091470 | 1145033 | 97.64  |
| 2    | 4.883 | 147021  | 26076   | 2.36   |

**Supplementary Figure 190.** HPLC Spectra of **15** obtained from (*R,S*)-L1.  
 Auto-Scaled Chromatogram

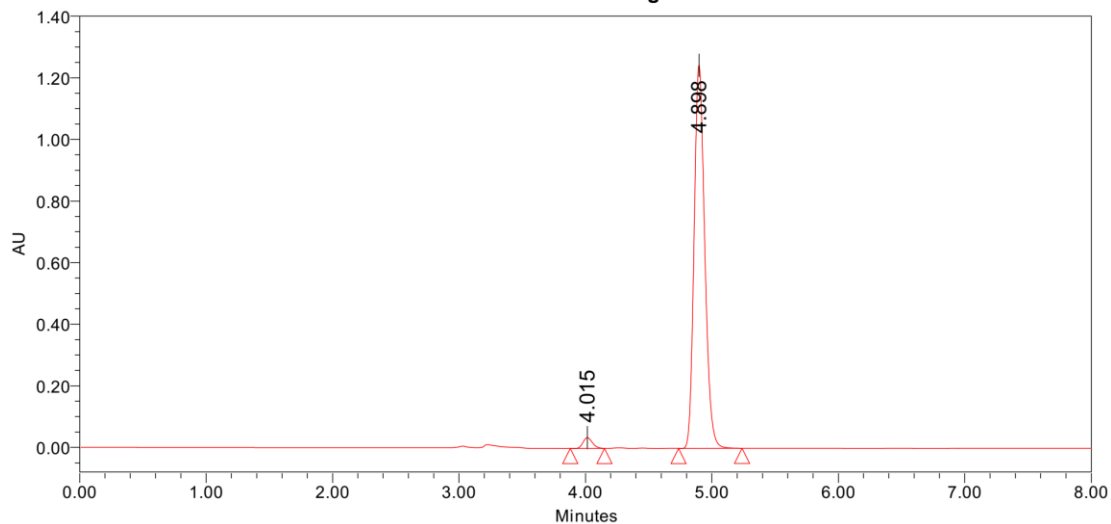

Peak Results

| Name | RT    | Area    | Height  | % Area |
|------|-------|---------|---------|--------|
| 1    | 4.015 | 180819  | 34868   | 2.43   |
| 2    | 4.898 | 7271602 | 1243900 | 97.57  |

**Supplementary Figure 191.** HPLC Spectra of **15** obtained from (*S,R*)-L1.

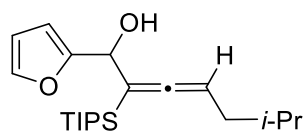

**Figure 3, entry 16**  
 (*R,S*)-L1: 88% ee; (*S,R*)-L1: 88% ee

**Auto-Scaled Chromatogram**

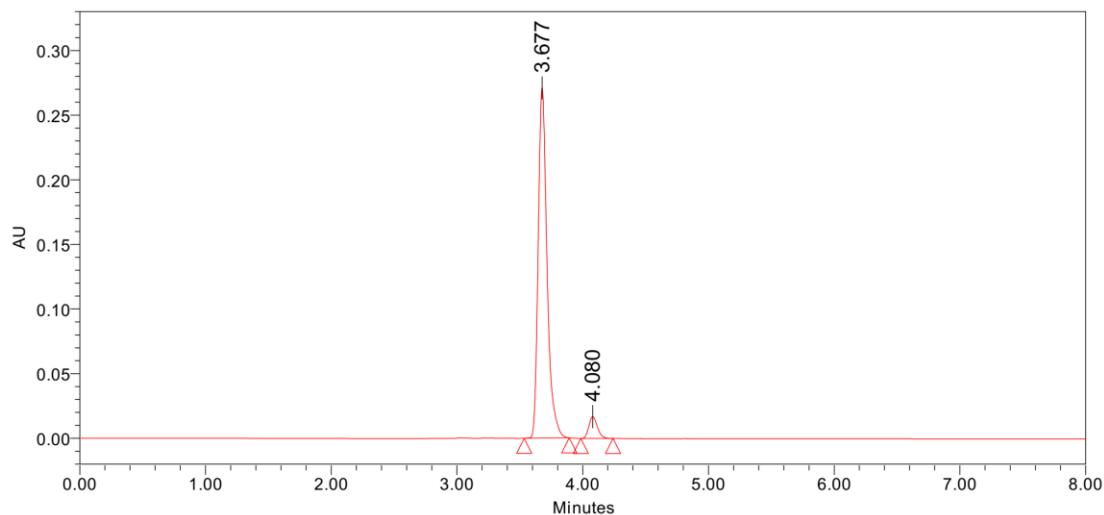

**Peak Results**

| Name | RT    | Area    | Height | % Area |
|------|-------|---------|--------|--------|
| 1    | 3.677 | 1323230 | 271019 | 94.39  |
| 2    | 4.080 | 78673   | 16841  | 5.61   |

**Supplementary Figure 192.** HPLC Spectra of 16 obtained from (*R,S*)-L1.

**Auto-Scaled Chromatogram**

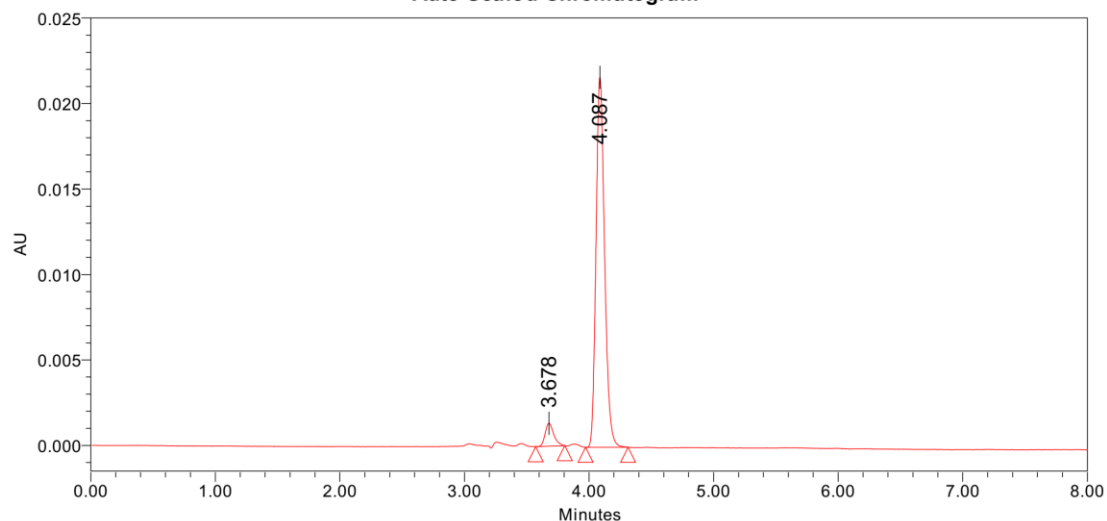

**Peak Results**

| Name | RT    | Area   | Height | % Area |
|------|-------|--------|--------|--------|
| 1    | 3.678 | 6455   | 1343   | 5.86   |
| 2    | 4.087 | 103613 | 21655  | 94.14  |

**Supplementary Figure 193.** HPLC Spectra of 16 obtained from (*S,R*)-L1.

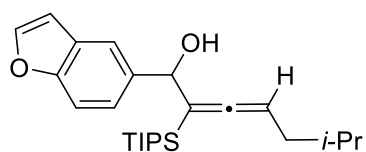

**Figure 3, entry 17**  
 (*R,S*)-L1: 92% ee; (*S,R*)-L1: 91% ee

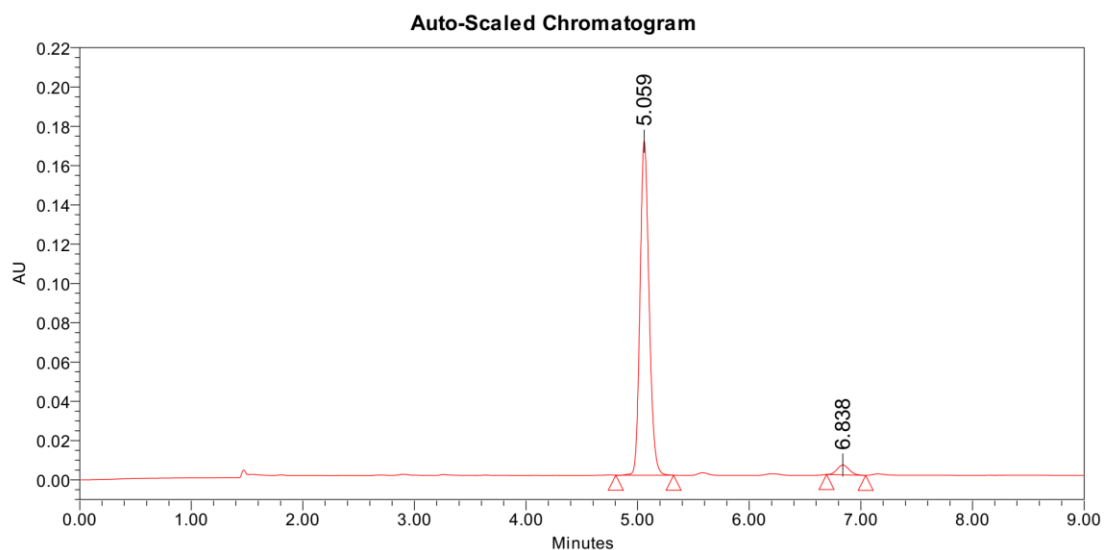

Peak Results

| Name | RT    | Area   | Height | % Area |
|------|-------|--------|--------|--------|
| 1    | 5.059 | 961321 | 170134 | 96.27  |
| 2    | 6.838 | 37252  | 4987   | 3.73   |

**Supplementary Figure 194.** HPLC Spectra of **17** obtained from (*R,S*)-L1.

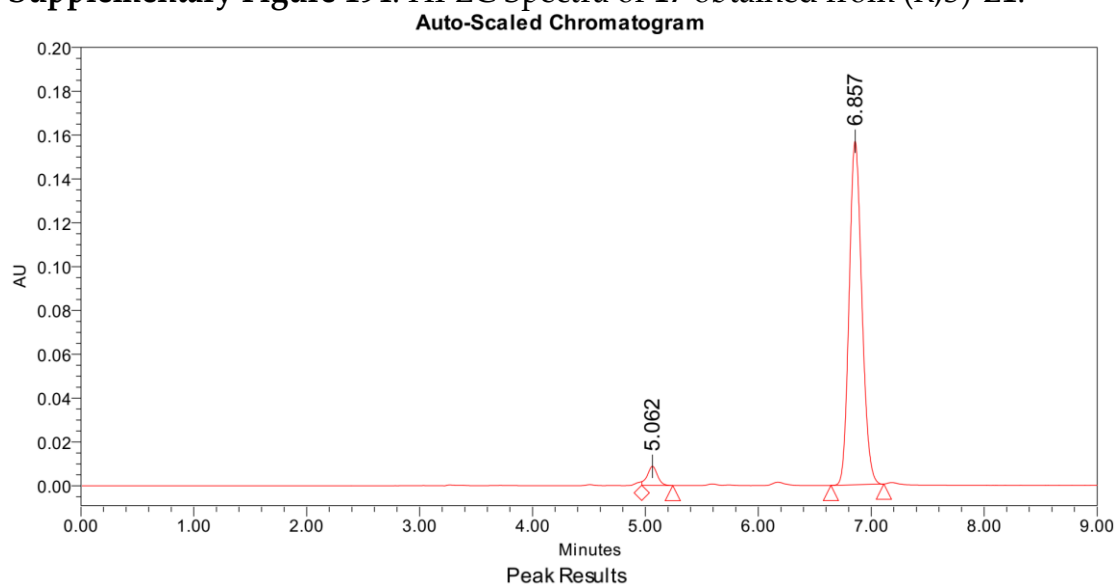

Peak Results

| Name | RT    | Area    | Height | % Area |
|------|-------|---------|--------|--------|
| 1    | 5.062 | 54105   | 8686   | 4.22   |
| 2    | 6.857 | 1226927 | 156760 | 95.78  |

**Supplementary Figure 195.** HPLC Spectra of **17** obtained from (*S,R*)-L1.

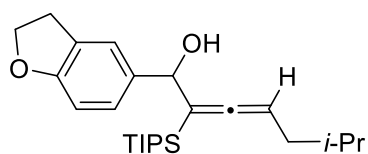

**Figure 3, entry 18**  
 (*R,S*)-L1: 94% ee; (*S,R*)-L1: 92% ee

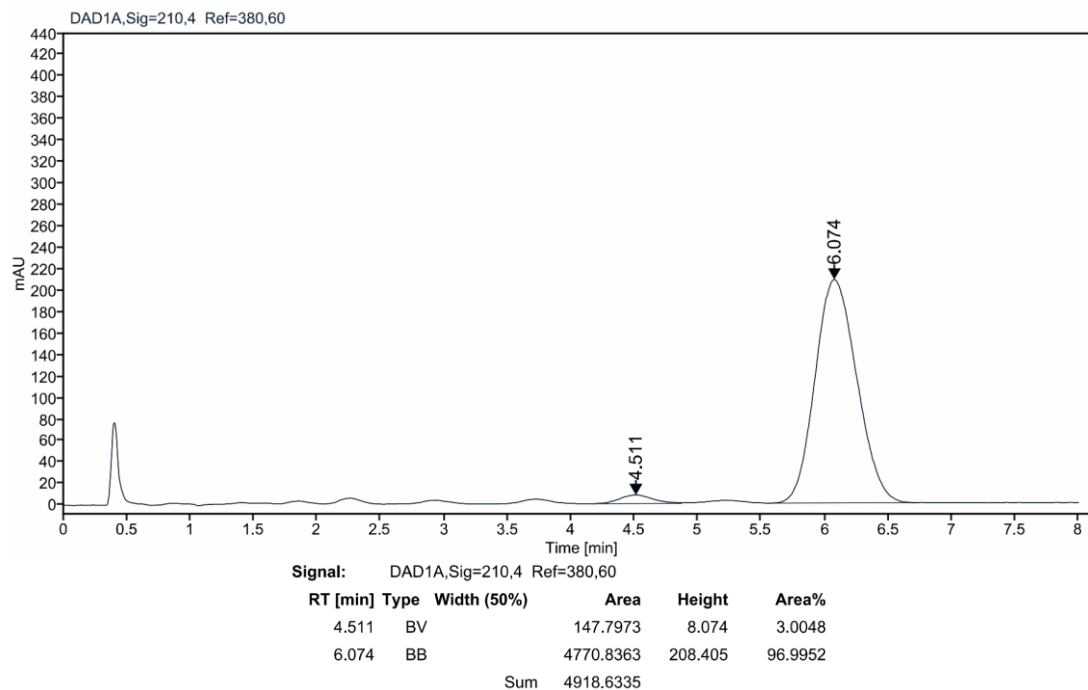

**Supplementary Figure 196.** SFC Spectra of 18 obtained from (*R,S*)-L1.

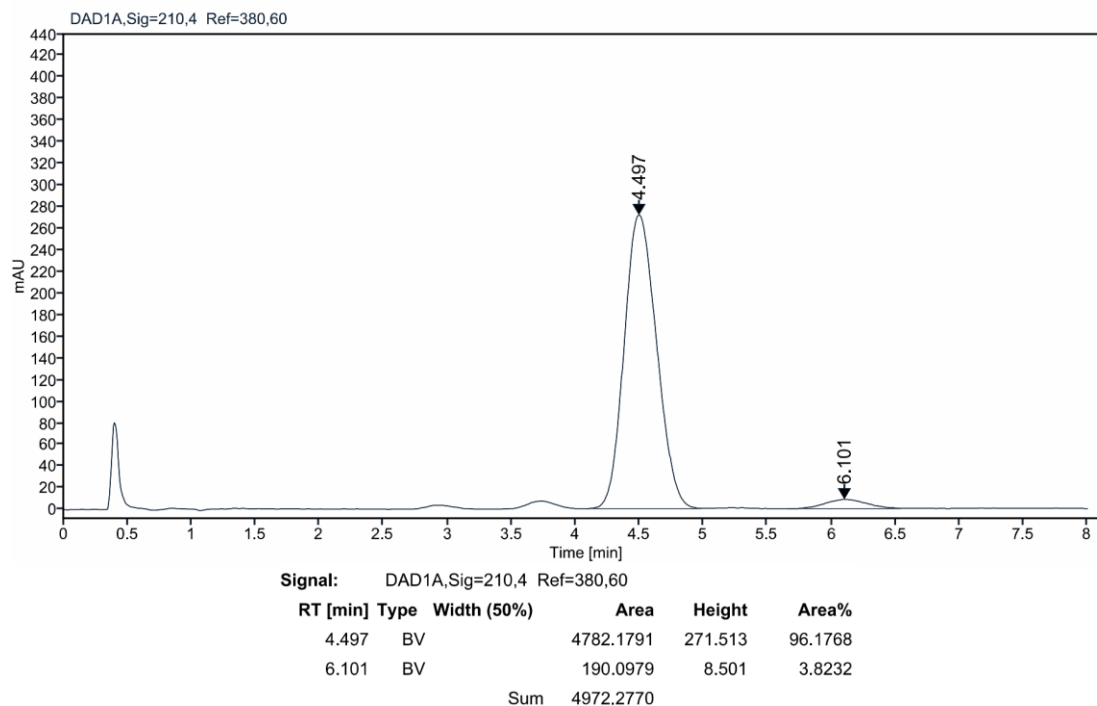

**Supplementary Figure 197.** SFC Spectra of 18 obtained from (*S,R*)-L1.

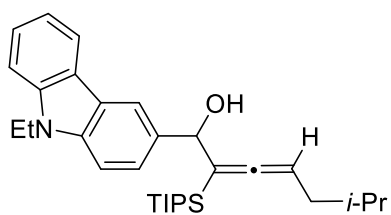

**Figure 3, entry 19**  
 (R,S)-L1: 94% ee; (S,R)-L1: 94% ee  
**Auto-Scaled Chromatogram**

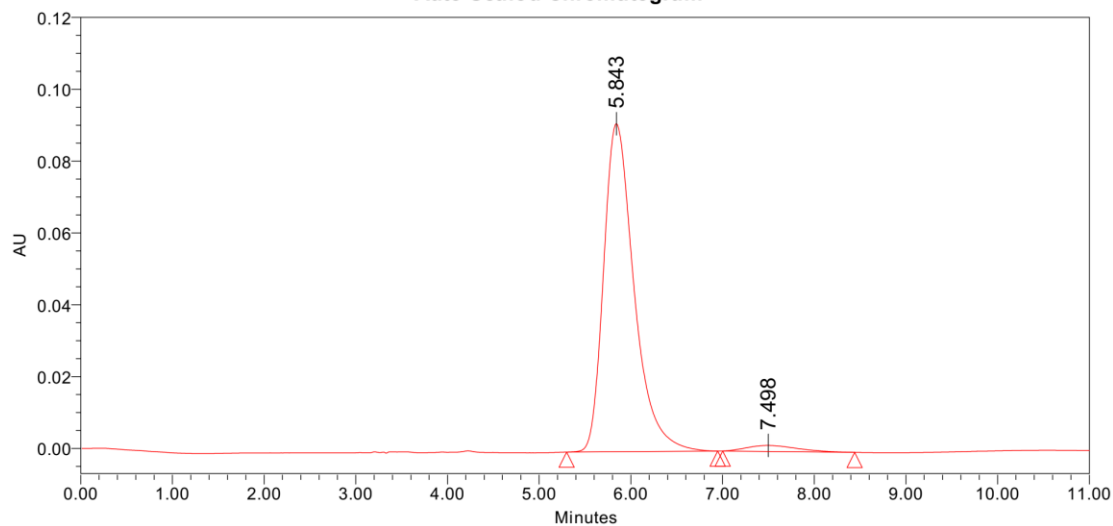

Peak Results

| Name | RT    | Area    | Height | % Area |
|------|-------|---------|--------|--------|
| 1    | 5.843 | 2108361 | 91329  | 97.06  |
| 2    | 7.498 | 63766   | 1674   | 2.94   |

**Supplementary Figure 198. HPLC Spectra of 19 obtained from (R,S)-L1.**  
**Auto-Scaled Chromatogram**

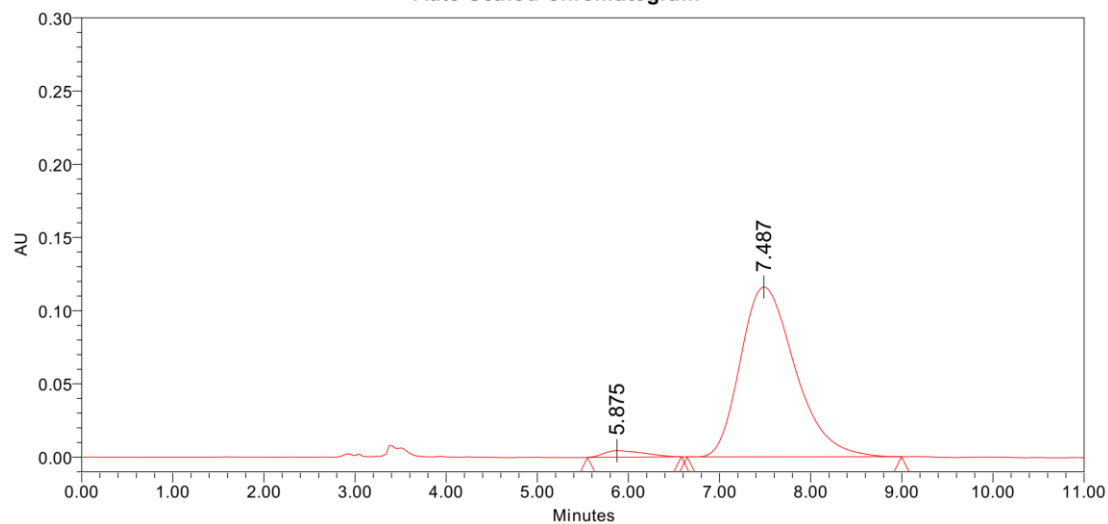

Peak Results

| Name | RT    | Area    | Height | % Area |
|------|-------|---------|--------|--------|
| 1    | 5.875 | 135253  | 4463   | 2.72   |
| 2    | 7.487 | 4829121 | 115938 | 97.28  |

**Supplementary Figure 199. HPLC Spectra of 19 obtained from (S,R)-L1.**

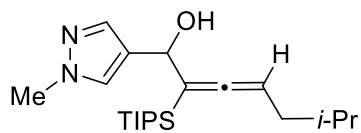

**Figure 3, entry 20**  
 (*R,S*)-L1: 96% ee; (*S,R*)-L1: 95% ee

**Auto-Scaled Chromatogram**

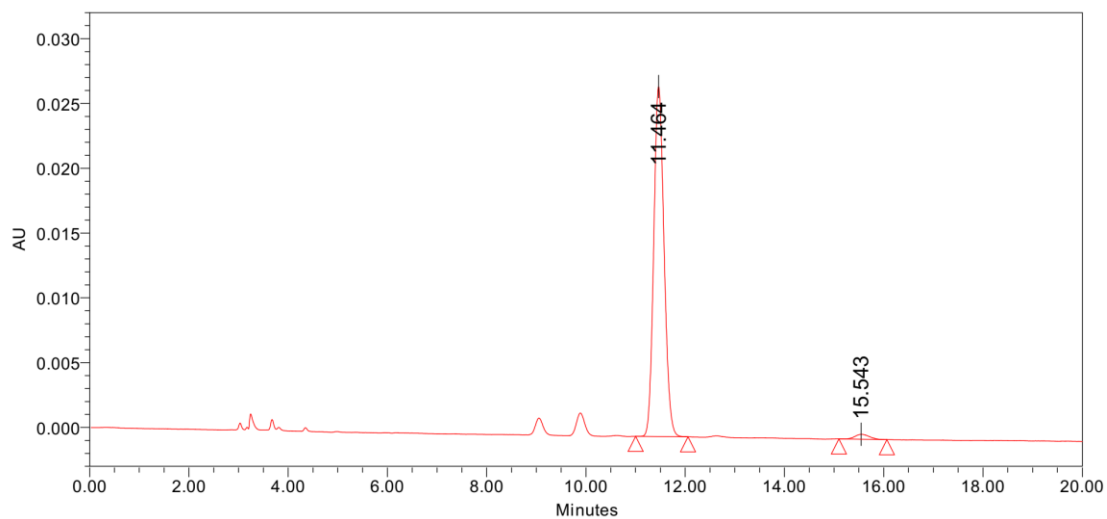

Peak Results

| Name | RT     | Area   | Height | % Area |
|------|--------|--------|--------|--------|
| 1    | 11.464 | 389944 | 27009  | 98.10  |
| 2    | 15.543 | 7563   | 380    | 1.90   |

**Supplementary Figure 200. HPLC Spectra of 20 obtained from (*R,S*)-L1.**

**Auto-Scaled Chromatogram**

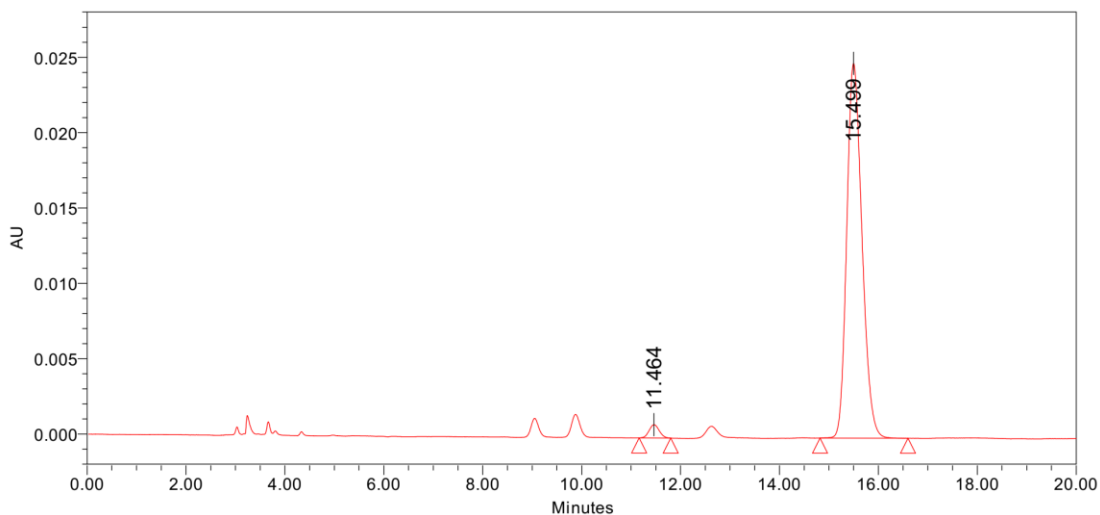

Peak Results

| Name | RT     | Area   | Height | % Area |
|------|--------|--------|--------|--------|
| 1    | 11.464 | 12522  | 887    | 2.30   |
| 2    | 15.499 | 532516 | 24868  | 97.70  |

**Supplementary Figure 201. HPLC Spectra of 20 obtained from (*S,R*)-L1.**

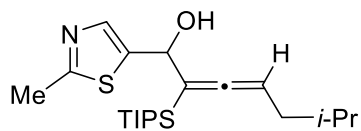

**Figure 3, entry 21**  
 (*R,S*)-L1: 94% ee; (*S,R*)-L1: 96% ee  
**Auto-Scaled Chromatogram**

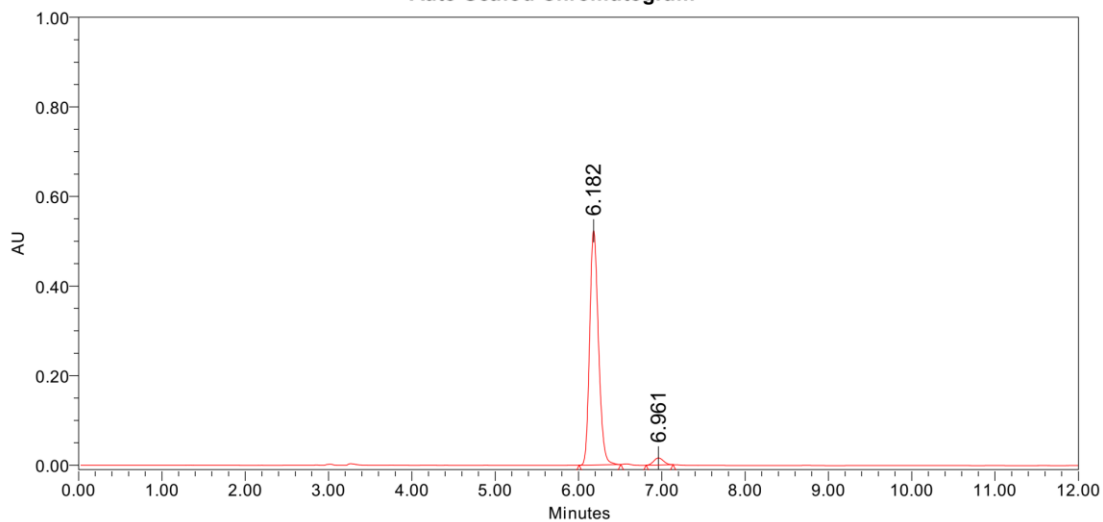

Peak Results

| Name | RT    | Area    | Height | % Area |
|------|-------|---------|--------|--------|
| 1    | 6.182 | 3833387 | 523256 | 96.77  |
| 2    | 6.961 | 127826  | 15830  | 3.23   |

**Supplementary Figure 202. HPLC Spectra of 21 obtained from (*R,S*)-L1.**

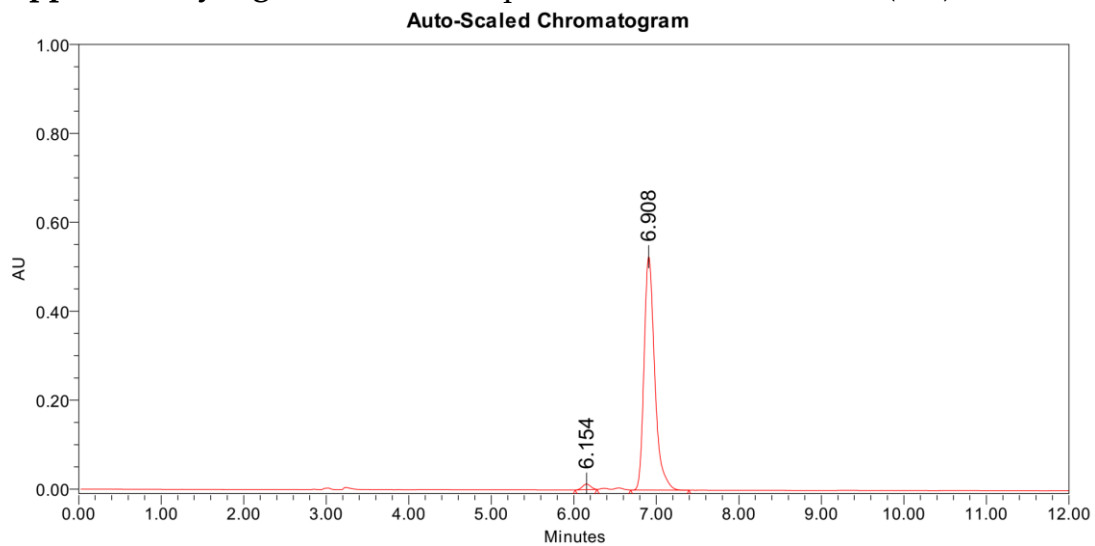

Peak Results

| Name | RT    | Area    | Height | % Area |
|------|-------|---------|--------|--------|
| 1    | 6.154 | 86269   | 12525  | 1.79   |
| 2    | 6.908 | 4722592 | 525049 | 98.21  |

**Supplementary Figure 203. HPLC Spectra of 21 obtained from (*S,R*)-L1.**



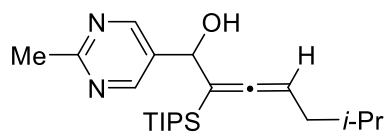

**Figure 3, entry 22**  
 (*R,S*)-L1: 94% ee; (*S,R*)-L1: 94% ee

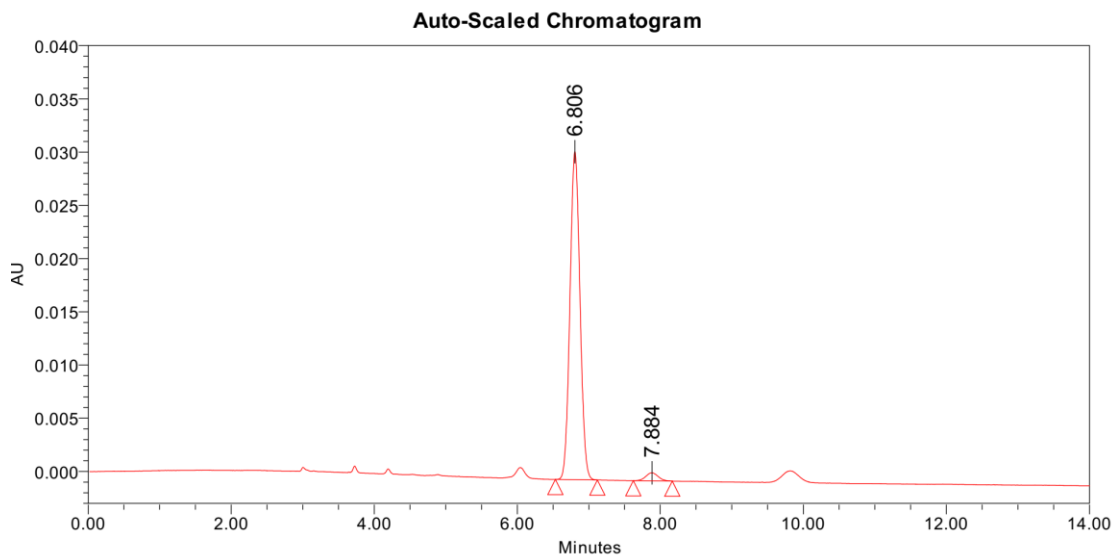

Peak Results

| Name | RT    | Area   | Height | % Area |
|------|-------|--------|--------|--------|
| 1    | 6.806 | 299250 | 30813  | 97.09  |
| 2    | 7.884 | 8974   | 746    | 2.91   |

**Supplementary Figure 204.** HPLC Spectra of **22** obtained from (*R,S*)-L1.

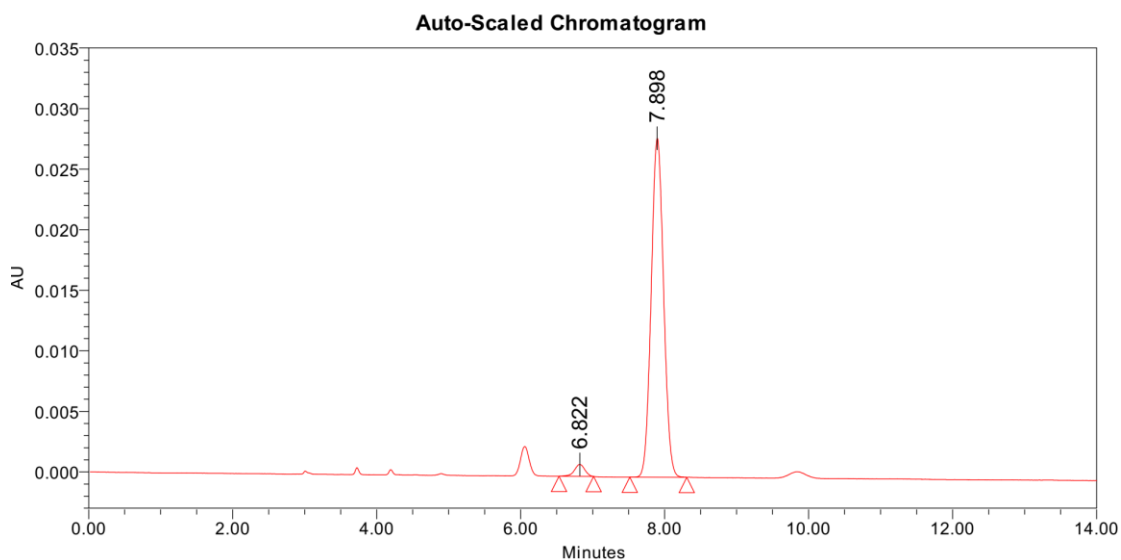

Peak Results

| Name | RT    | Area   | Height | % Area |
|------|-------|--------|--------|--------|
| 1    | 6.822 | 9885   | 986    | 2.87   |
| 2    | 7.898 | 335068 | 27999  | 97.13  |

**Supplementary Figure 205.** HPLC Spectra of **22** obtained from (*S,R*)-L1.

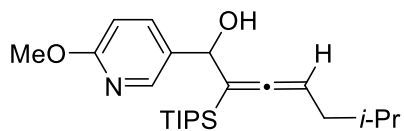

**Figure 3, entry 23**  
 (*R,S*)-L1: 94% ee; (*S,R*)-L1: 94% ee

Auto-Scaled Chromatogram

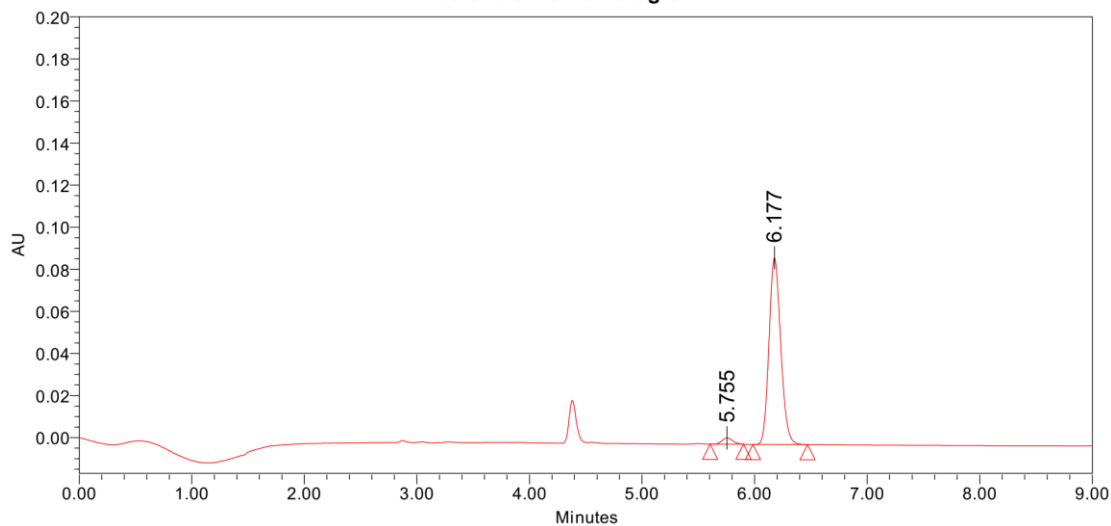

Peak Results

| Name | RT    | Area   | Height | % Area |
|------|-------|--------|--------|--------|
| 1    | 5.755 | 19773  | 2982   | 2.99   |
| 2    | 6.177 | 642229 | 88734  | 97.01  |

**Supplementary Figure 206.** HPLC Spectra of **23** obtained from (*R,S*)-L1.

Auto-Scaled Chromatogram

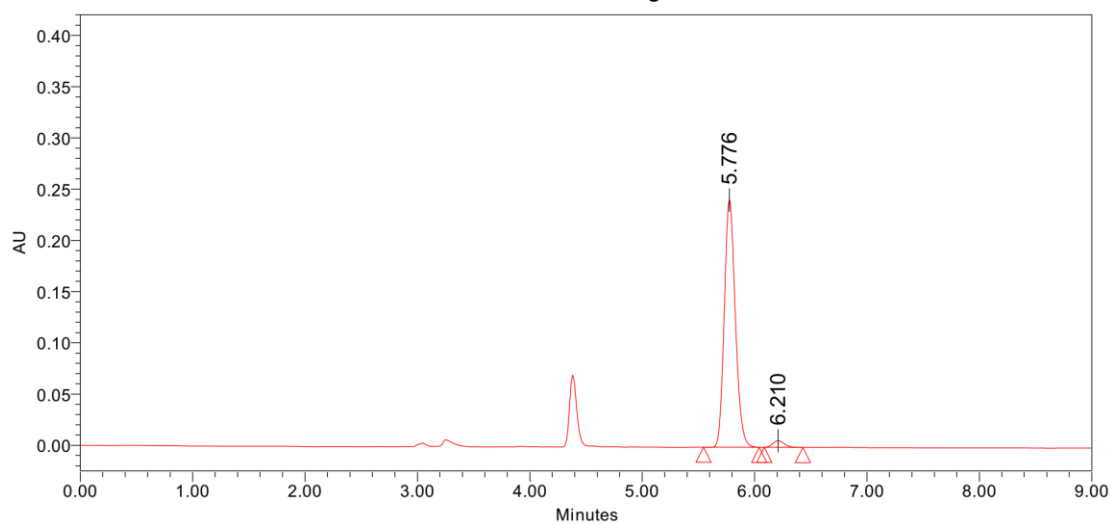

Peak Results

| Name | RT    | Area    | Height | % Area |
|------|-------|---------|--------|--------|
| 1    | 5.776 | 1649670 | 241316 | 97.26  |
| 2    | 6.210 | 46388   | 6487   | 2.74   |

**Supplementary Figure 207.** HPLC Spectra of **23** obtained from (*S,R*)-L1.

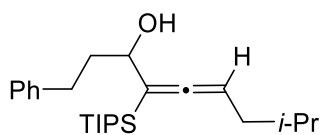

**Figure 3, entry 24**  
*(R,S)*-L1: 88% ee; *(S,R)*-L1: 86% ee

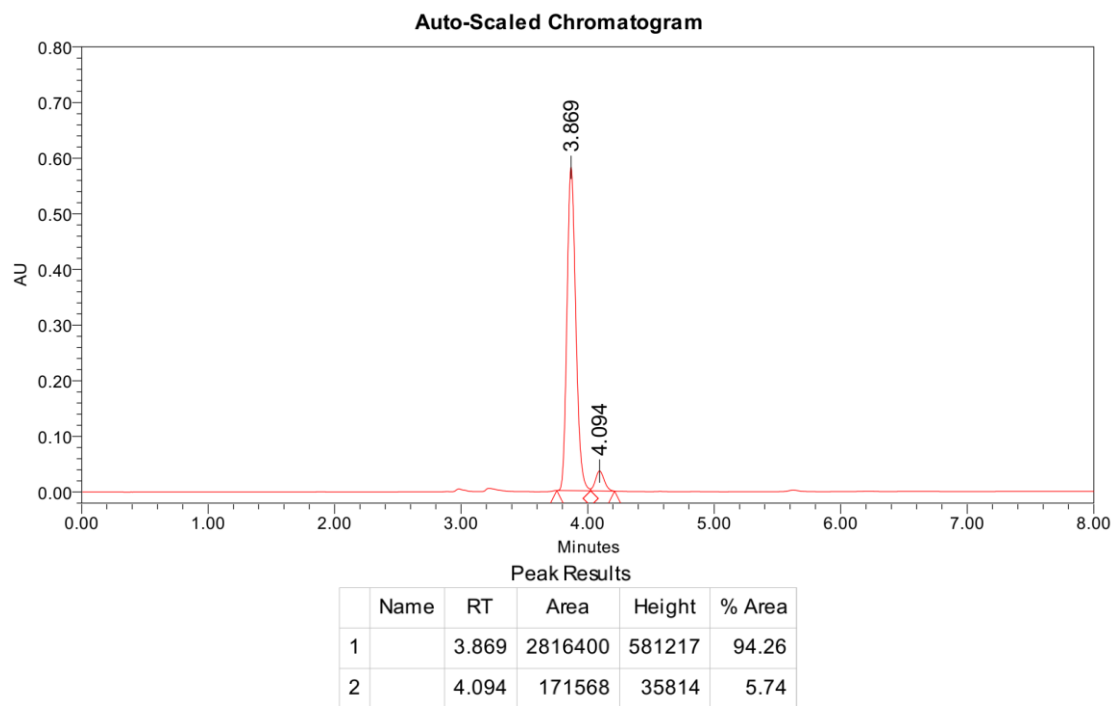

**Supplementary Figure 208. HPLC Spectra of 24 obtained from *(R,S)*-L1.**  
**Auto-Scaled Chromatogram**

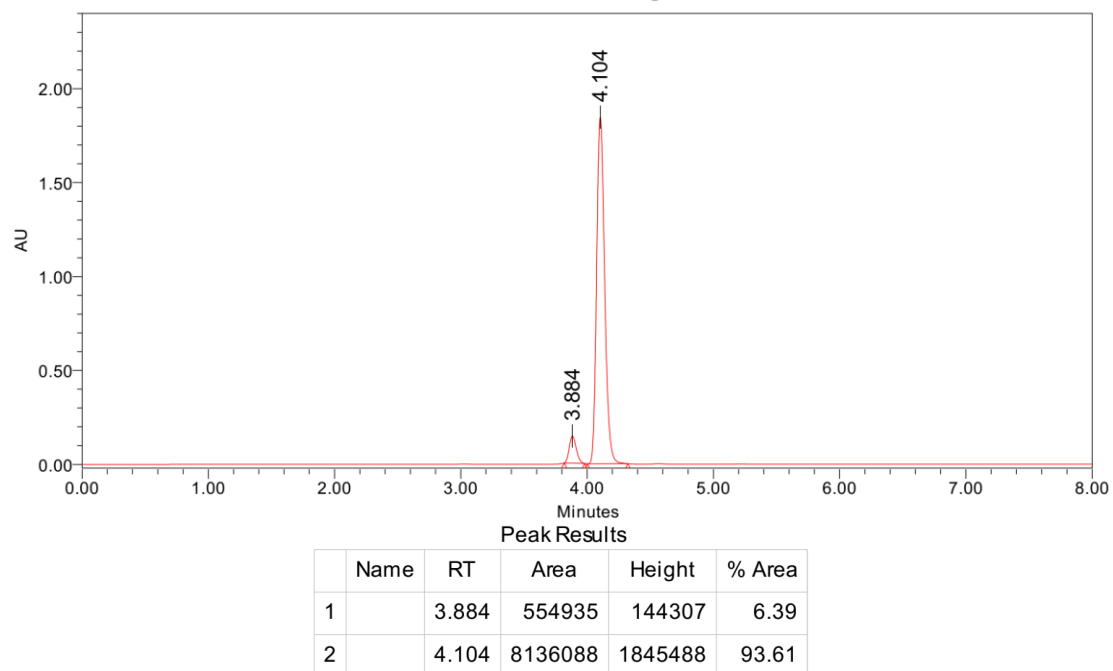

**Supplementary Figure 209. HPLC Spectra of 24 obtained from *(S,R)*-L1.**

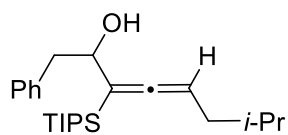

**Figure 3, entry 25**  
*(R,S)*-L1: 88% ee; *(S,R)*-L1: 88% ee  
**Auto-Scaled Chromatogram**

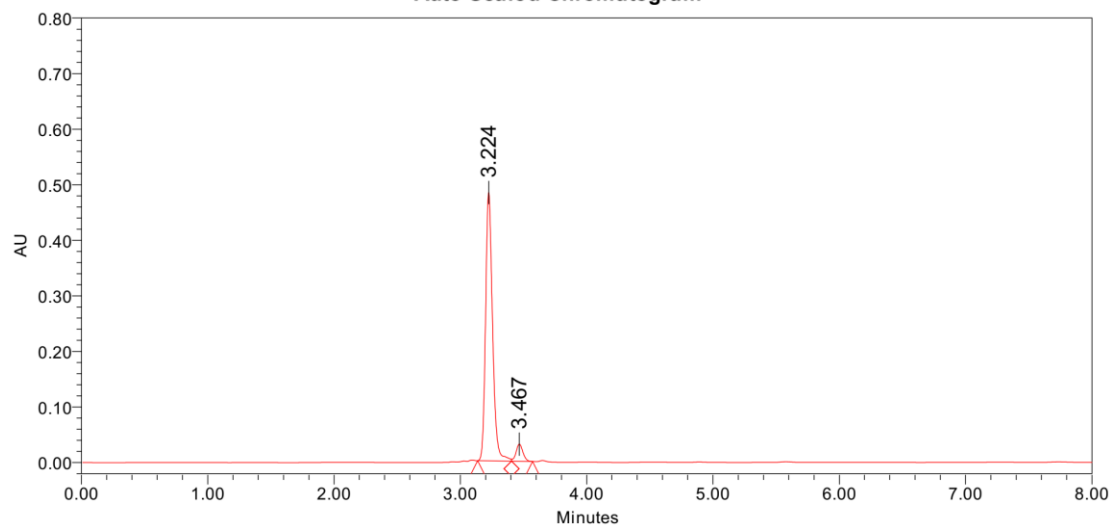

Peak Results

| Name | RT    | Area    | Height | % Area |
|------|-------|---------|--------|--------|
| 1    | 3.224 | 1853421 | 483208 | 94.13  |
| 2    | 3.467 | 115491  | 30822  | 5.87   |

**Supplementary Figure 210. HPLC Spectra of 25 obtained from *(R,S)*-L1.**  
**Auto-Scaled Chromatogram**

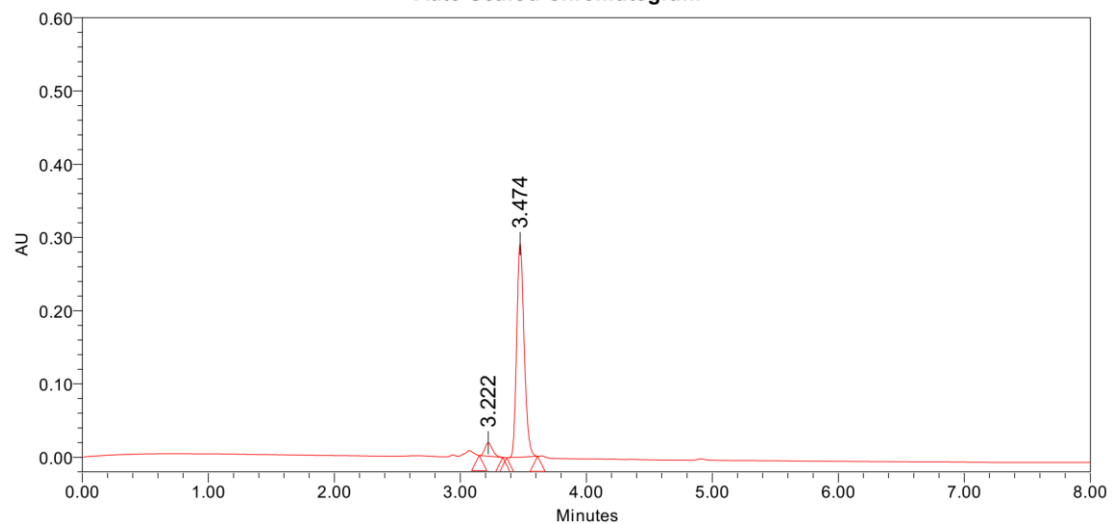

Peak Results

| Name | RT    | Area    | Height | % Area |
|------|-------|---------|--------|--------|
| 1    | 3.222 | 75601   | 18325  | 5.97   |
| 2    | 3.474 | 1191459 | 291538 | 94.03  |

**Supplementary Figure 211. HPLC Spectra of 25 obtained from *(S,R)*-L1.**

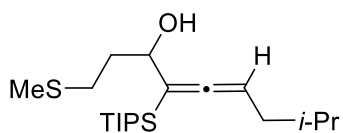

**Figure 3, entry 26**  
 (*R,S*)-L1: 80% ee; (*S,R*)-L1: 78% ee

**Auto-Scaled Chromatogram**

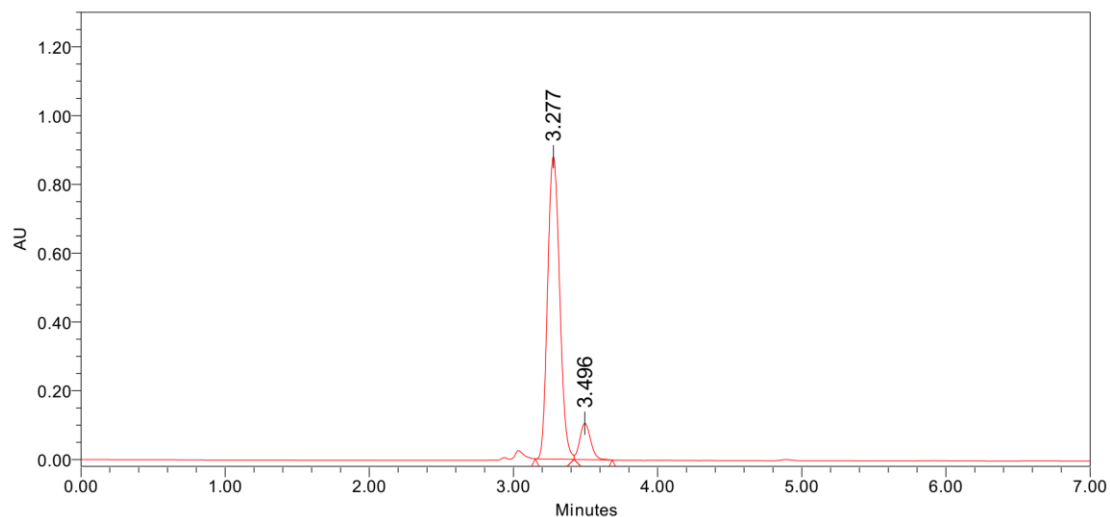

| Peak Results |       |         |        |        |
|--------------|-------|---------|--------|--------|
| Name         | RT    | Area    | Height | % Area |
| 1            | 3.277 | 5096379 | 879144 | 90.20  |
| 2            | 3.496 | 553444  | 105353 | 9.80   |

**Supplementary Figure 212. HPLC Spectra of 26 obtained from (*R,S*)-L1.**

**Auto-Scaled Chromatogram**

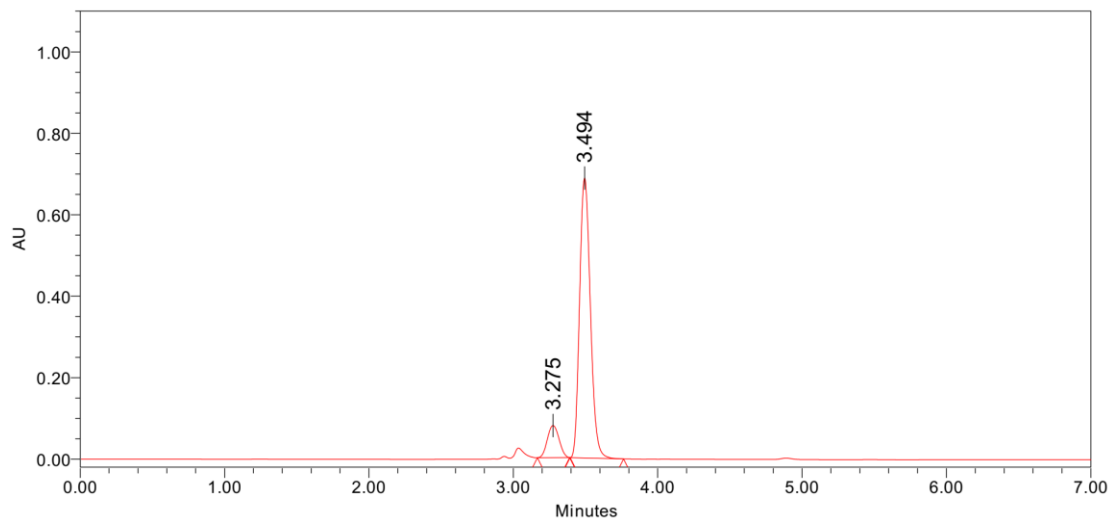

| Peak Results |       |         |        |        |
|--------------|-------|---------|--------|--------|
| Name         | RT    | Area    | Height | % Area |
| 1            | 3.275 | 444515  | 78889  | 11.09  |
| 2            | 3.494 | 3563489 | 687716 | 88.91  |

**Supplementary Figure 213. HPLC Spectra of 26 obtained from (*S,R*)-L1.**

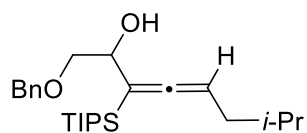

**Figure 3, entry 27**  
 (*R,S*)-L1: 82% ee; (*S,R*)-L1: 80% ee  
**Auto-Scaled Chromatogram**

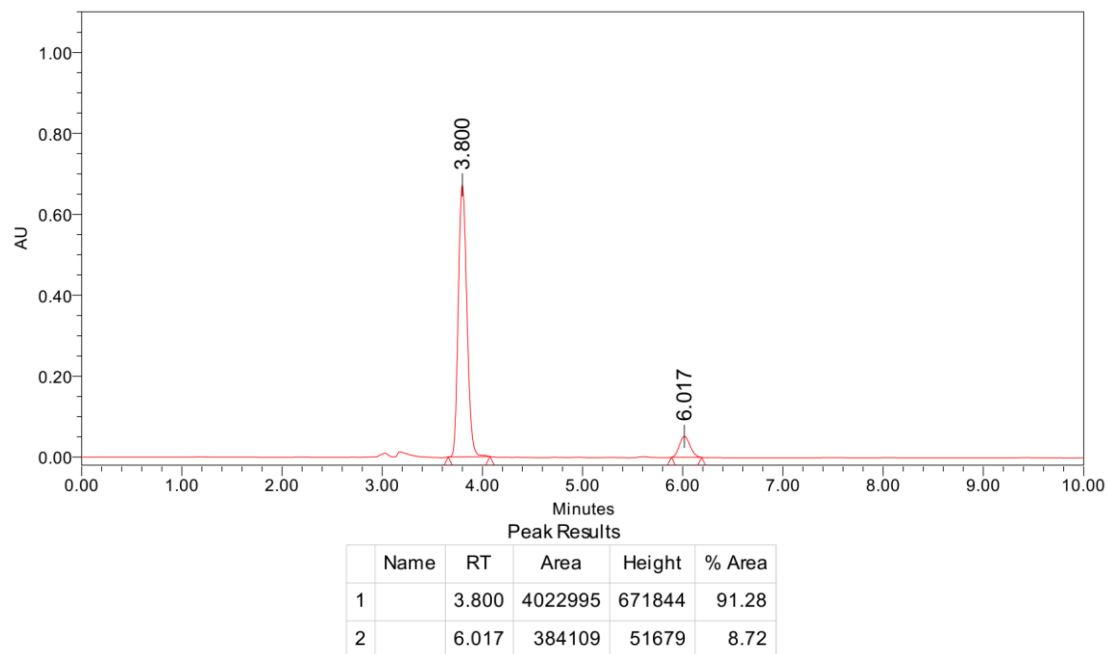

**Supplementary Figure 214. HPLC Spectra of 27 obtained from (*R,S*)-L1.**  
**Auto-Scaled Chromatogram**

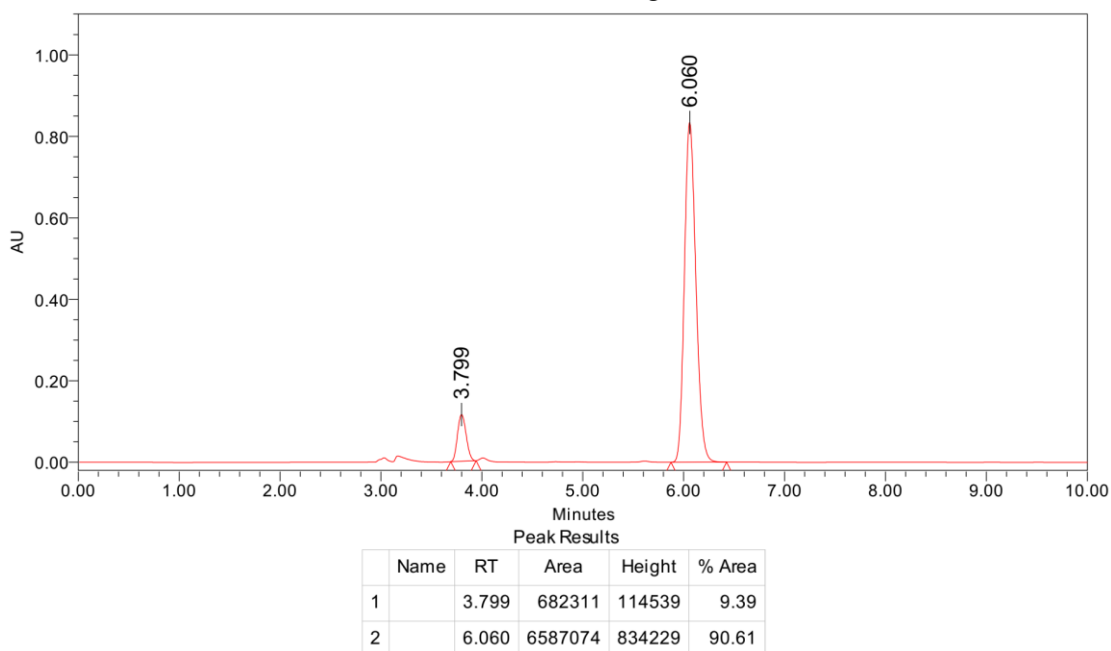

**Supplementary Figure 215. HPLC Spectra of 27 obtained from (*S,R*)-L1.**

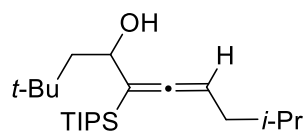

**Figure 3, entry 28**  
*(R,S)*-L1: 82% ee; *(S,R)*-L1: 83% ee  
**Auto-Scaled Chromatogram**

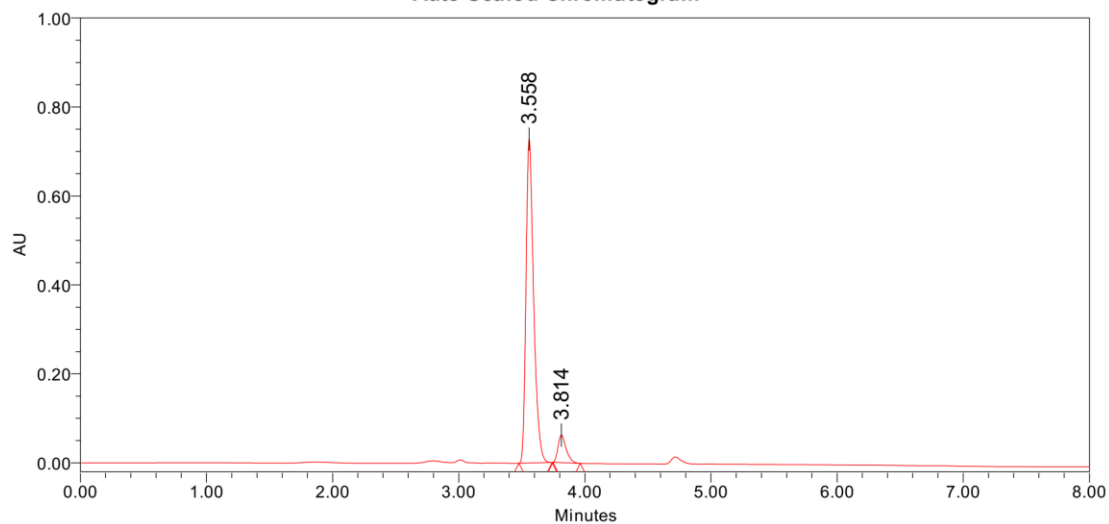

Peak Results

| Name | RT    | Area    | Height | % Area |
|------|-------|---------|--------|--------|
| 1    | 3.558 | 3067036 | 728275 | 91.69  |
| 2    | 3.814 | 277936  | 61949  | 8.31   |

**Supplementary Figure 216. HPLC Spectra of 28 obtained from *(R,S)*-L1.**  
**Auto-Scaled Chromatogram**

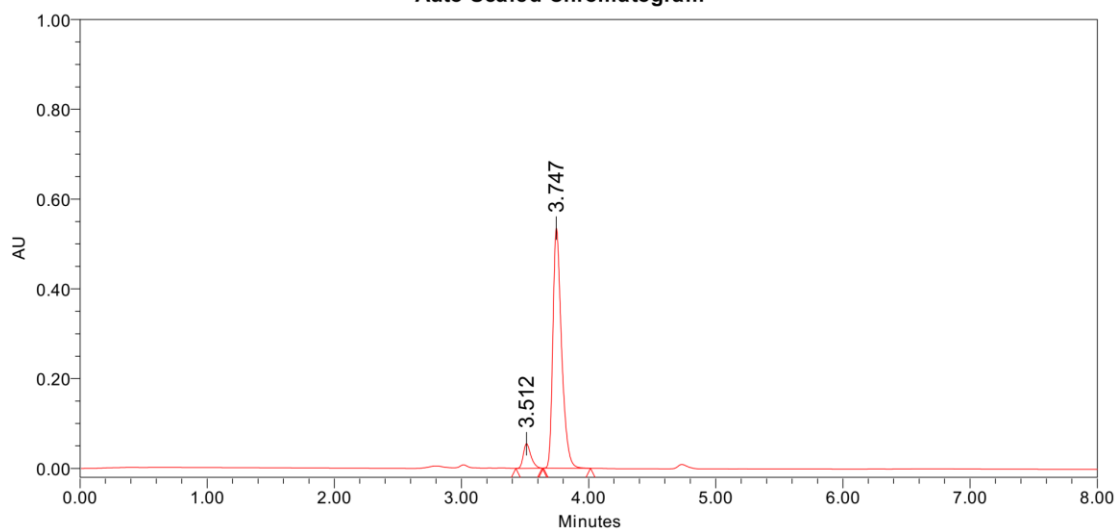

Peak Results

| Name | RT    | Area    | Height | % Area |
|------|-------|---------|--------|--------|
| 1    | 3.512 | 226156  | 54670  | 8.18   |
| 2    | 3.747 | 2539961 | 534906 | 91.82  |

**Supplementary Figure 217. HPLC Spectra of 28 obtained from *(S,R)*-L1.**

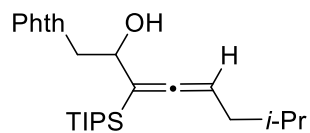

**Figure 3, entry 29**  
 (*R,S*)-L1: 89% ee; (*S,R*)-L1: 87% ee

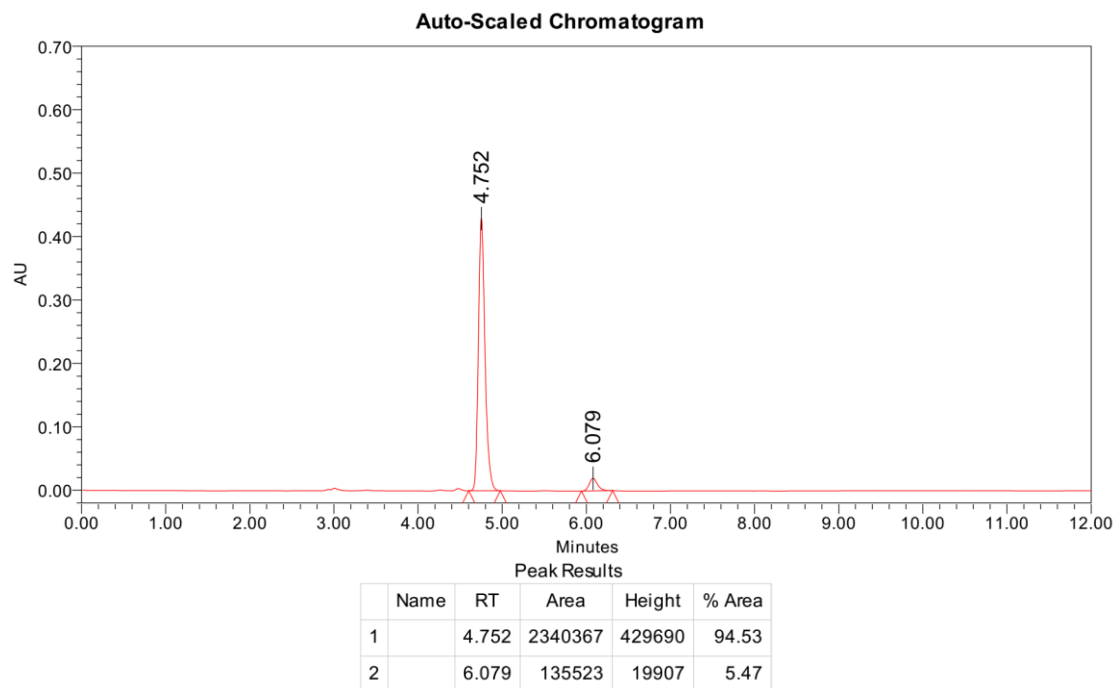

**Supplementary Figure 218. HPLC Spectra of 29 obtained from (*R,S*)-L1.**  
**Auto-Scaled Chromatogram**

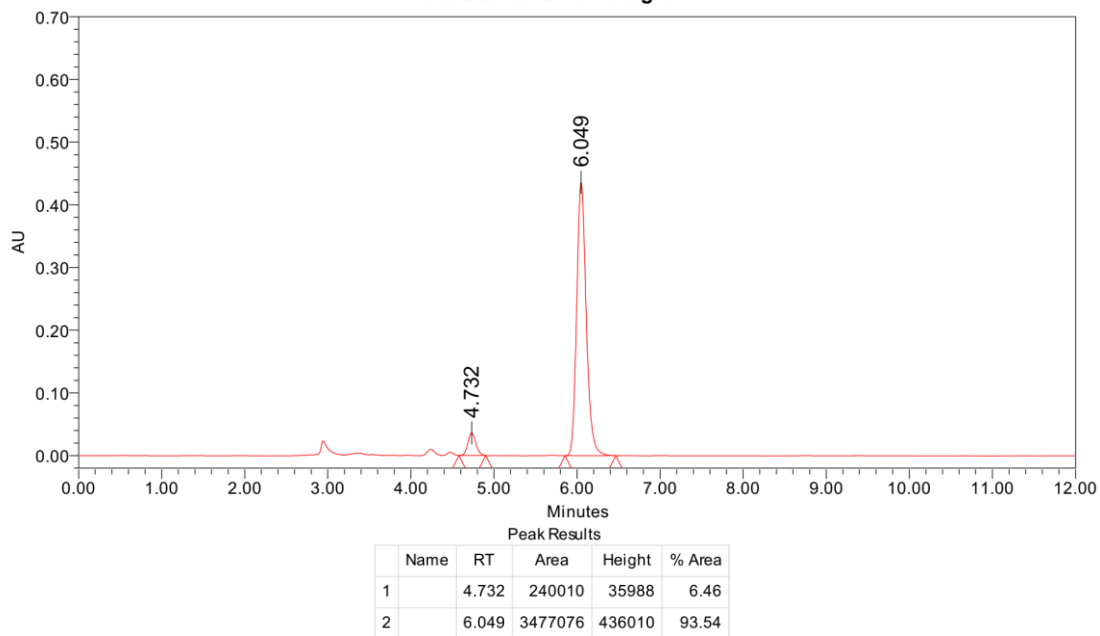

**Supplementary Figure 219. HPLC Spectra of 29 obtained from (*S,R*)-L1.**



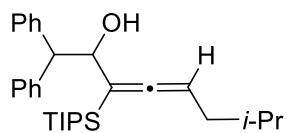

**Figure 3, entry 30**  
 (*R,S*)-L1: 96% ee; (*S,R*)-L1: 94% ee

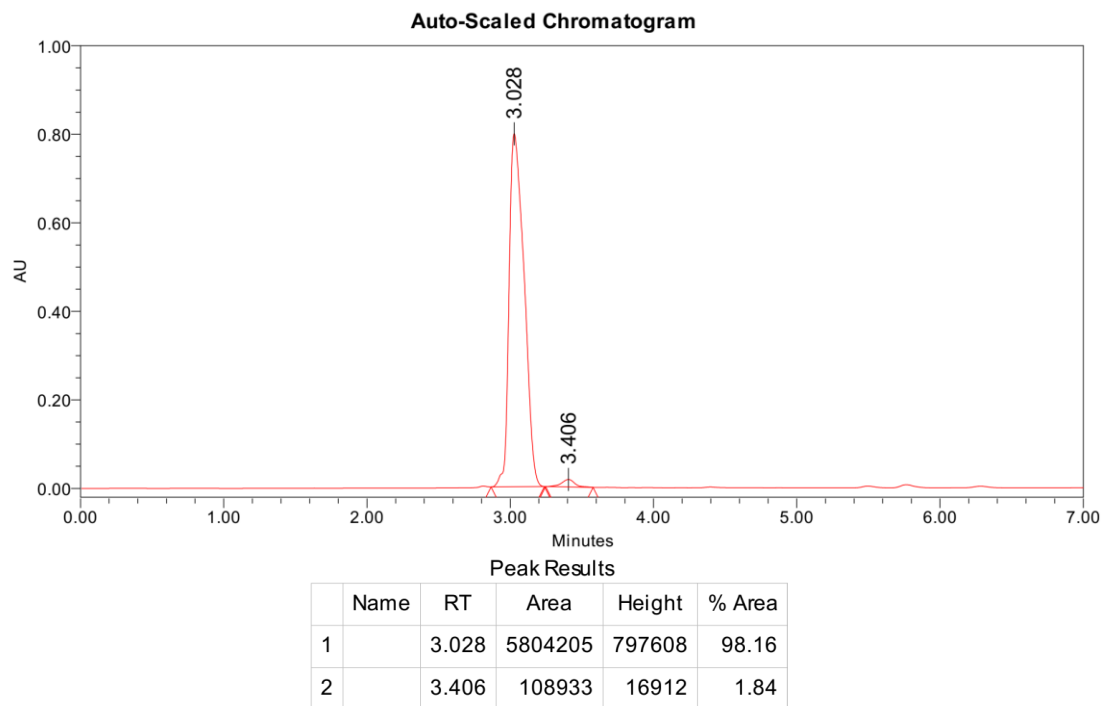

**Supplementary Figure 220. HPLC Spectra of 30 obtained from (*R,S*)-L1.**  
**Auto-Scaled Chromatogram**

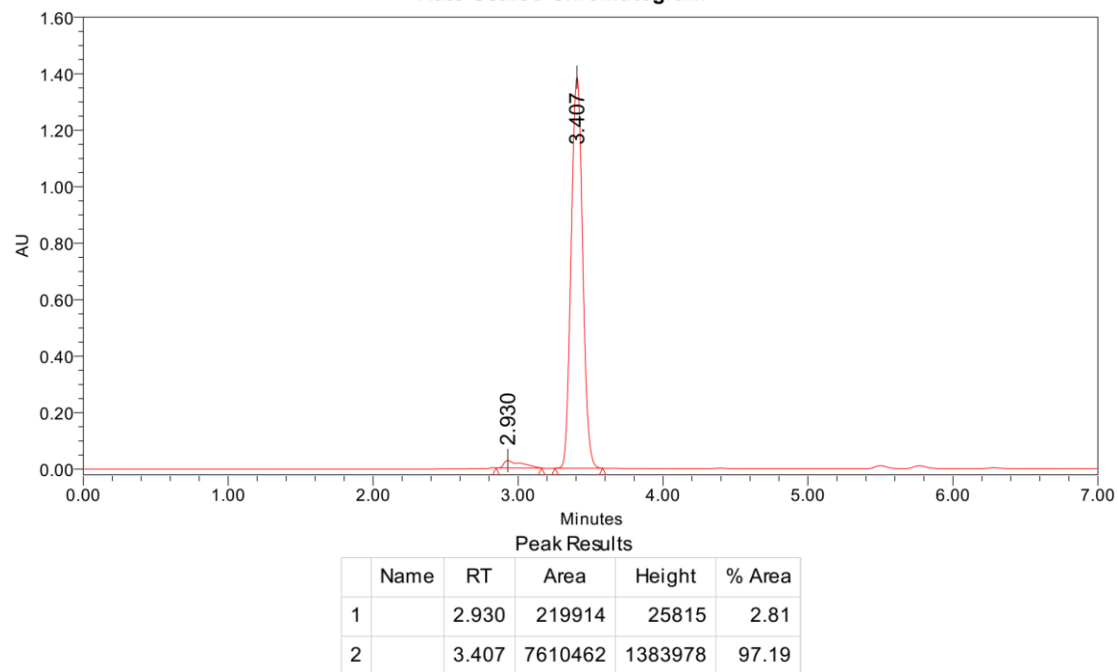

**Supplementary Figure 221. HPLC Spectra of 30 obtained from (*S,R*)-L1.**

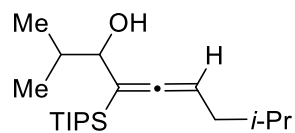

**Figure 3, entry 31**  
 (*R,S*)-L1: 96% ee; (*S,R*)-L1: 96% ee

**Auto-Scaled Chromatogram**

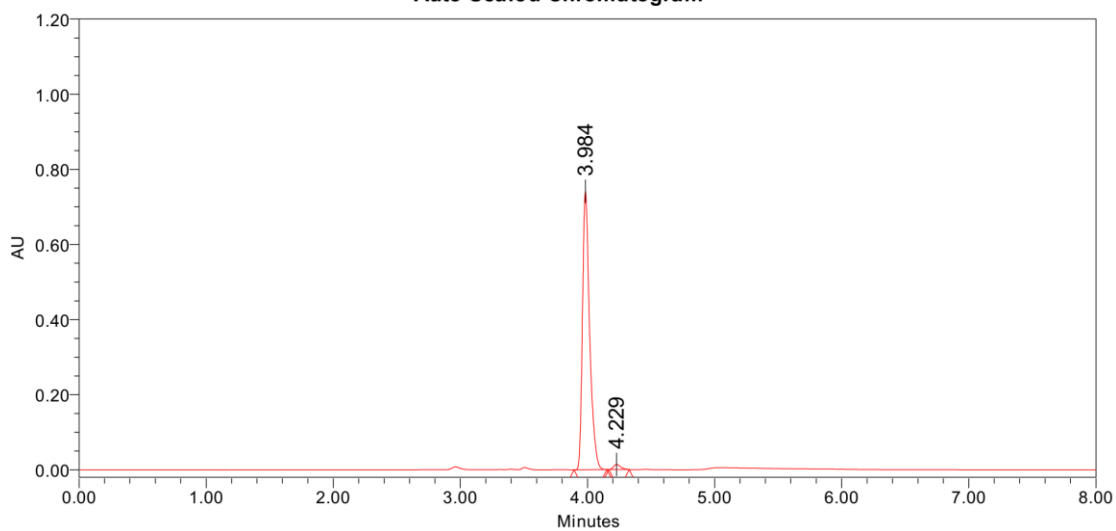

Peak Results

| Name | RT    | Area    | Height | % Area |
|------|-------|---------|--------|--------|
| 1    | 3.984 | 2889046 | 741354 | 98.22  |
| 2    | 4.229 | 52353   | 13611  | 1.78   |

**Supplementary Figure 222. HPLC Spectra of 31 obtained from (*R,S*)-L1.**

**Auto-Scaled Chromatogram**

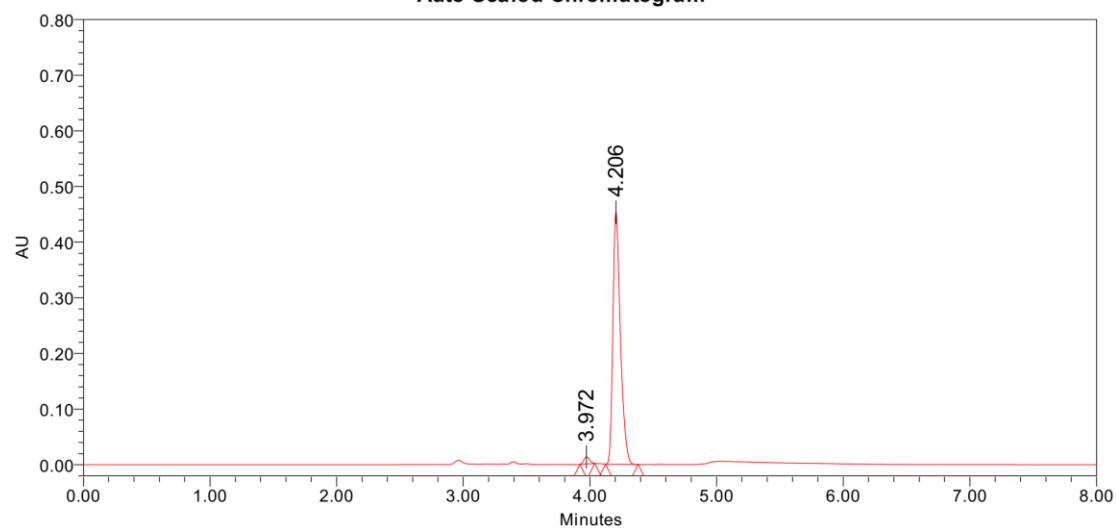

Peak Results

| Name | RT    | Area    | Height | % Area |
|------|-------|---------|--------|--------|
| 1    | 3.972 | 41063   | 12665  | 2.15   |
| 2    | 4.206 | 1870039 | 453416 | 97.85  |

**Supplementary Figure 223. HPLC Spectra of 31 obtained from (*S,R*)-L1.**

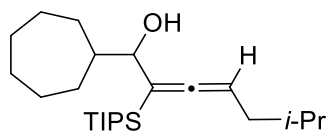

**Figure 3, entry 32**  
 (*R,S*)-L1: 97% ee; (*S,R*)-L1: 98% ee  
**Auto-Scaled Chromatogram**

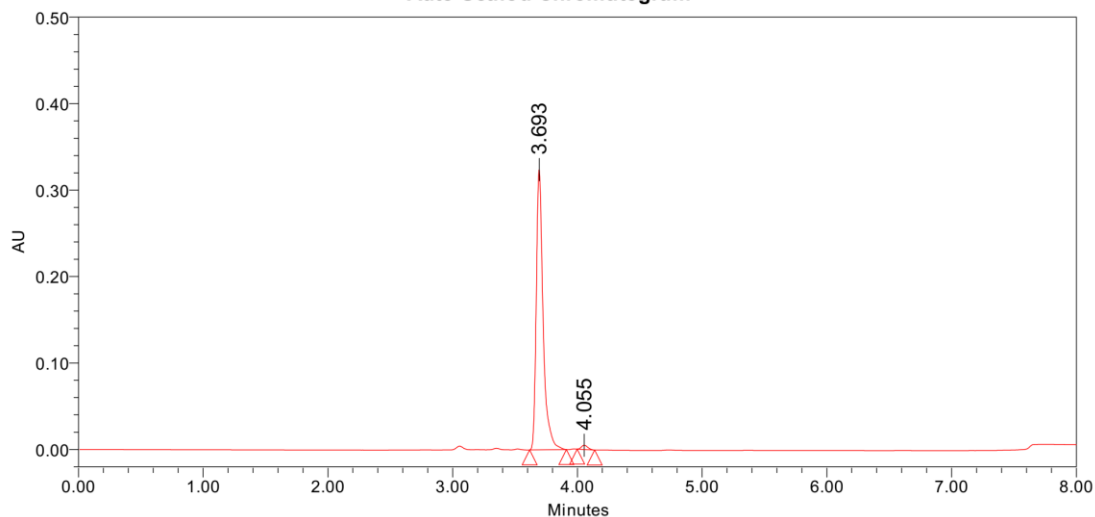

Peak Results

| Name | RT    | Area    | Height | % Area |
|------|-------|---------|--------|--------|
| 1    | 3.693 | 1235430 | 324163 | 98.62  |
| 2    | 4.055 | 17307   | 4957   | 1.38   |

**Supplementary Figure 224. HPLC Spectra of 32 obtained from (*R,S*)-L1.**  
**Auto-Scaled Chromatogram**

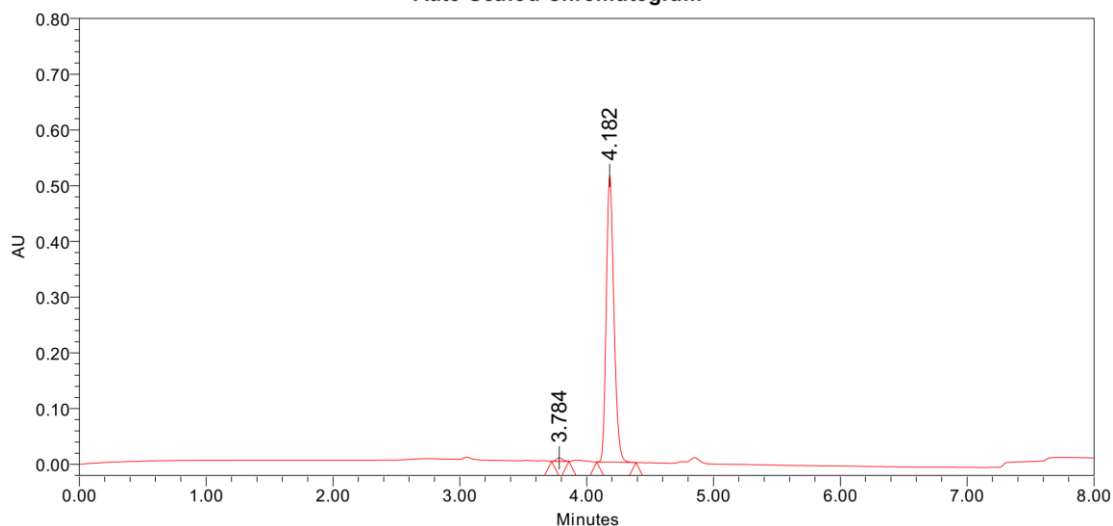

Peak Results

| Name | RT    | Area    | Height | % Area |
|------|-------|---------|--------|--------|
| 1    | 3.784 | 20913   | 6171   | 0.96   |
| 2    | 4.182 | 2158633 | 514476 | 99.04  |

**Supplementary Figure 225. HPLC Spectra of 32 obtained from (*S,R*)-L1.**

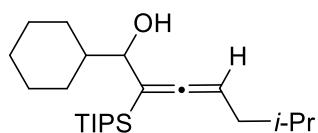

**Figure 3, entry 33**  
 (R,S)-L1: 94% ee; (S,R)-L1: 95% ee

**Auto-Scaled Chromatogram**

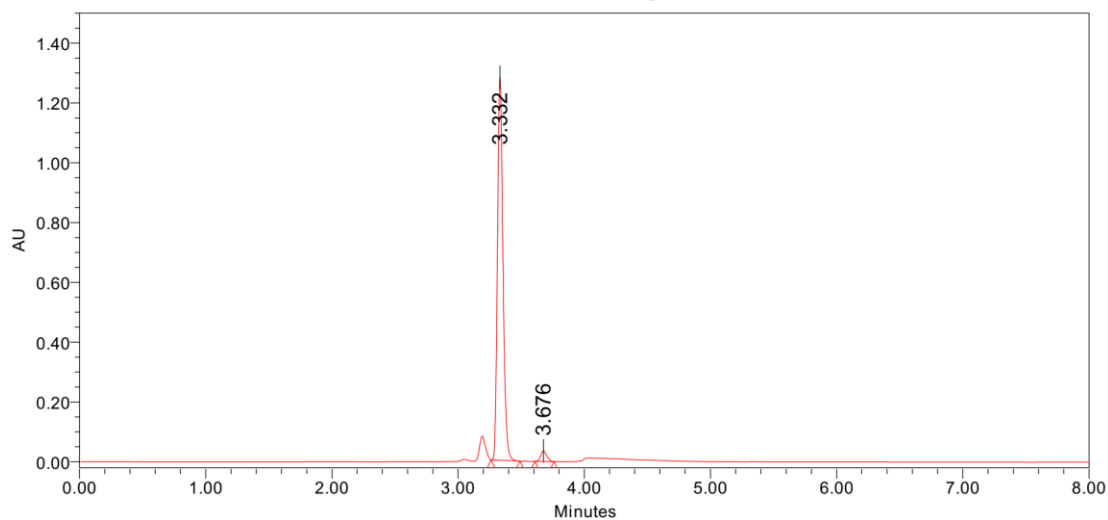

**Peak Results**

| Name | RT    | Area    | Height  | % Area |
|------|-------|---------|---------|--------|
| 1    | 3.332 | 3867018 | 1281354 | 97.05  |
| 2    | 3.676 | 117583  | 35612   | 2.95   |

**Supplementary Figure 226.** HPLC Spectra of 33 obtained from (R,S)-L1.

**Auto-Scaled Chromatogram**

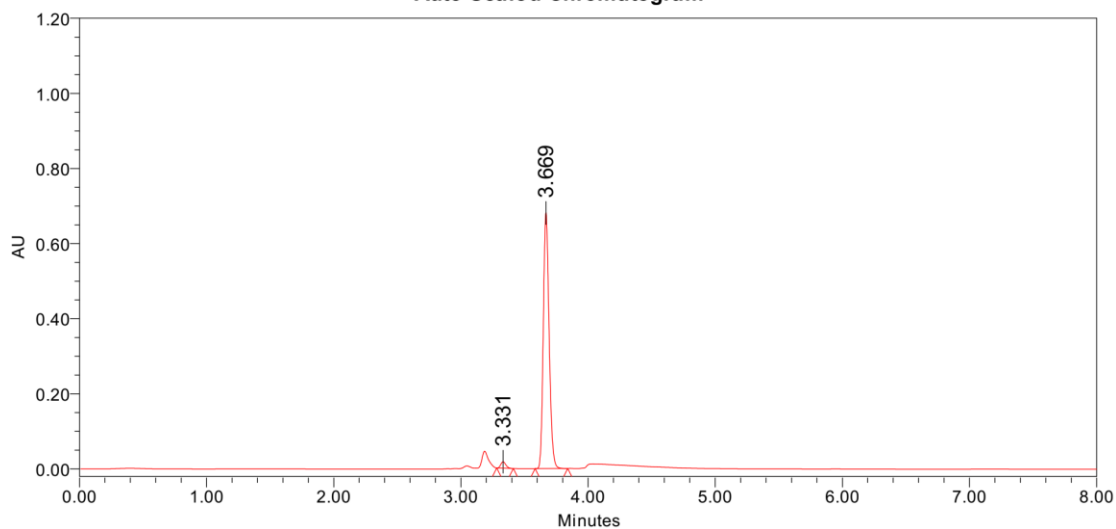

**Peak Results**

| Name | RT    | Area    | Height | % Area |
|------|-------|---------|--------|--------|
| 1    | 3.331 | 47848   | 17260  | 2.16   |
| 2    | 3.669 | 2166605 | 681775 | 97.84  |

**Supplementary Figure 227.** HPLC Spectra of 33 obtained from (S,R)-L1.

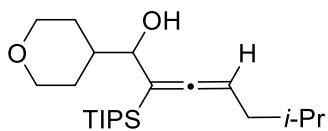

**Figure 3, entry 34**  
 (*R,S*)-L1: 92% ee; (*S,R*)-L1: 94% ee

**Auto-Scaled Chromatogram**

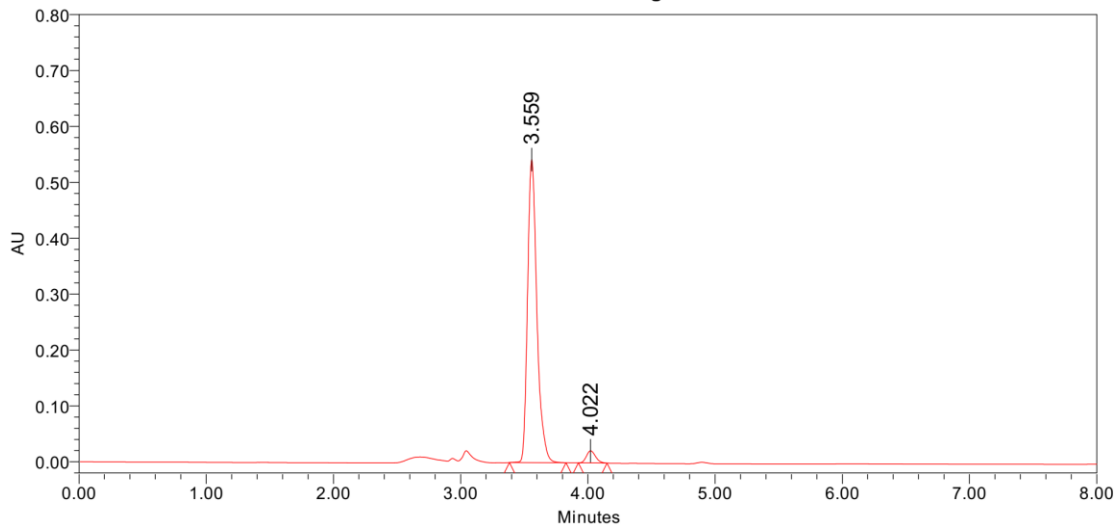

**Peak Results**

| Name | RT    | Area    | Height | % Area |
|------|-------|---------|--------|--------|
| 1    | 3.559 | 2770711 | 542054 | 96.23  |
| 2    | 4.022 | 108692  | 21767  | 3.77   |

**Supplementary Figure 228. HPLC Spectra of 34 obtained from (*R,S*)-L1.**

**Auto-Scaled Chromatogram**

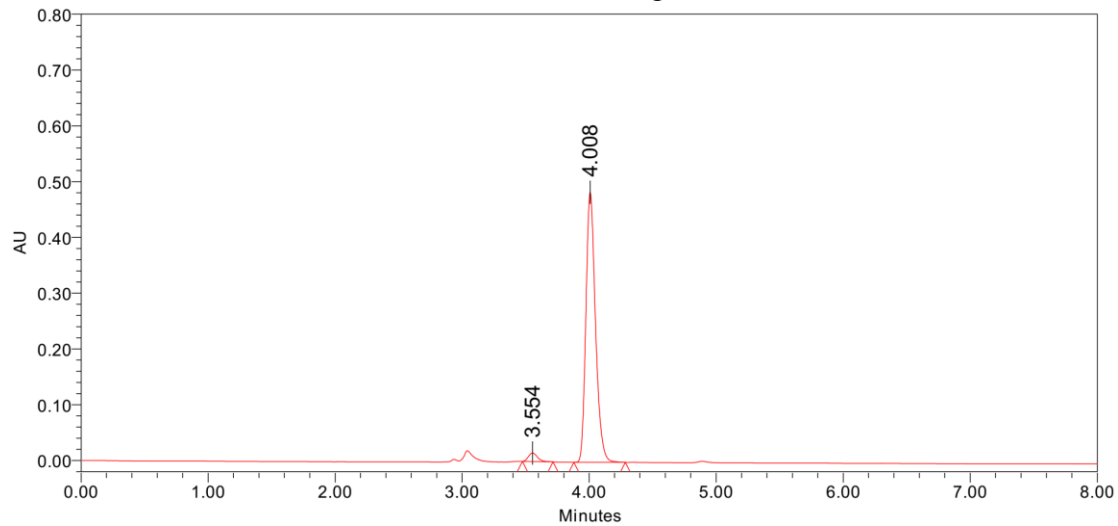

**Peak Results**

| Name | RT    | Area    | Height | % Area |
|------|-------|---------|--------|--------|
| 1    | 3.554 | 76089   | 15279  | 2.91   |
| 2    | 4.008 | 2540891 | 484206 | 97.09  |

**Supplementary Figure 229. HPLC Spectra of 34 obtained from (*S,R*)-L1.**

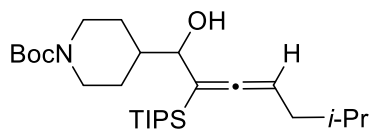

**Figure 3, entry 35**  
*(R,S)*-L1: 92% ee; *(S,R)*-L1: 92% ee  
**Auto-Scaled Chromatogram**

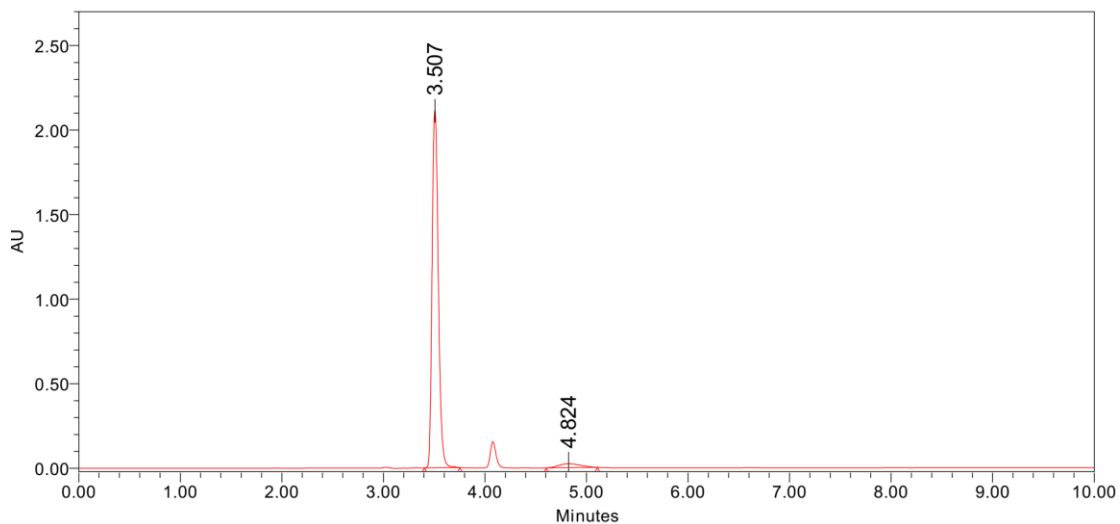

Peak Results

| Name | RT    | Area    | Height  | % Area |
|------|-------|---------|---------|--------|
| 1    | 3.507 | 9016936 | 2113154 | 96.24  |
| 2    | 4.824 | 352403  | 23610   | 3.76   |

**Supplementary Figure 230. HPLC Spectra of 35 obtained from *(R,S)*-L1.**  
**Auto-Scaled Chromatogram**

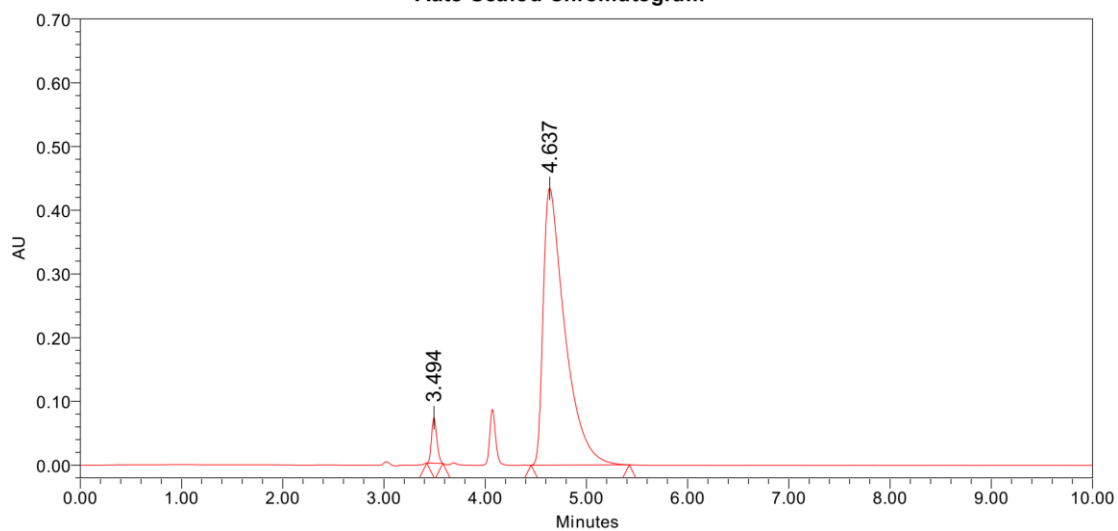

Peak Results

| Name | RT    | Area    | Height | % Area |
|------|-------|---------|--------|--------|
| 1    | 3.494 | 261997  | 71488  | 3.91   |
| 2    | 4.637 | 6440489 | 434397 | 96.09  |

**Supplementary Figure 231. HPLC Spectra of 35 obtained from *(S,R)*-L1.**

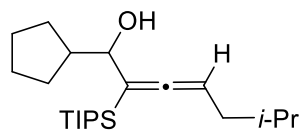

**Figure 3, entry 36**  
 (*R,S*)-L1: 92% ee; (*S,R*)-L1: 94% ee

**Auto-Scaled Chromatogram**

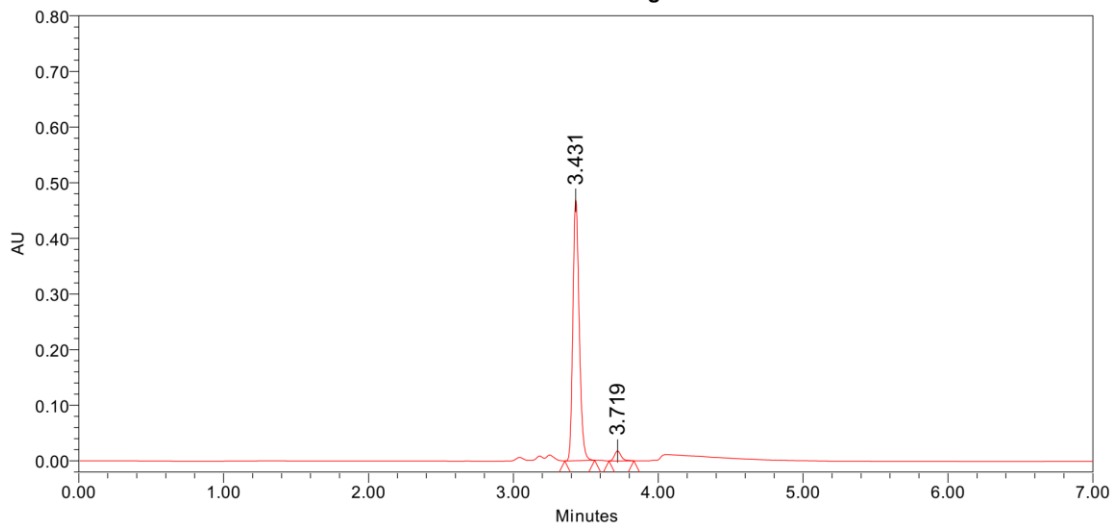

| Peak Results |      |       |         |        |        |
|--------------|------|-------|---------|--------|--------|
|              | Name | RT    | Area    | Height | % Area |
| 1            |      | 3.431 | 1420912 | 469411 | 96.11  |
| 2            |      | 3.719 | 57522   | 17866  | 3.89   |

**Supplementary Figure 232. HPLC Spectra of 36 obtained from (*R,S*)-L1.**

**Auto-Scaled Chromatogram**

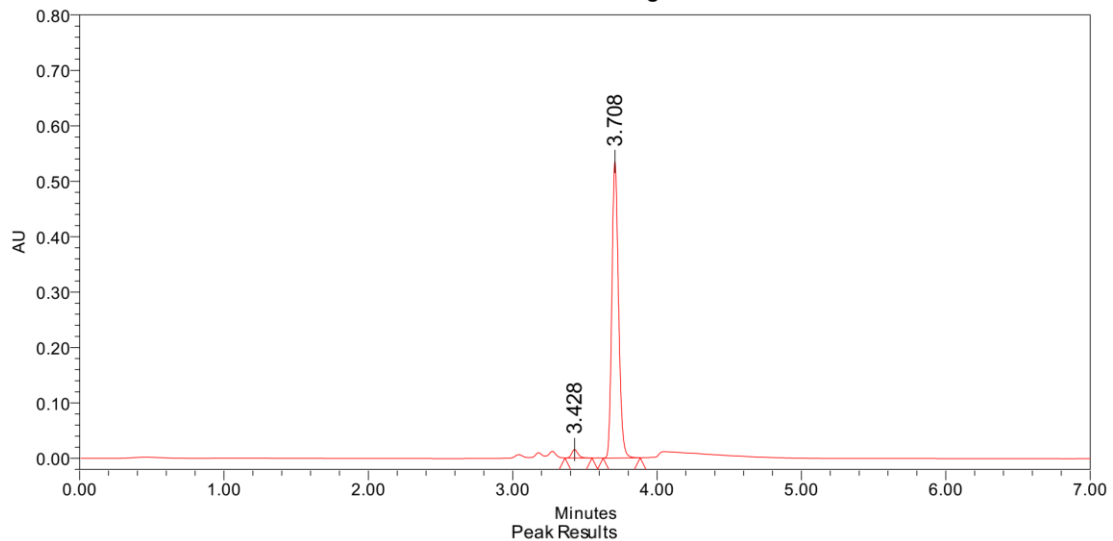

| Peak Results |      |       |         |        |        |
|--------------|------|-------|---------|--------|--------|
|              | Name | RT    | Area    | Height | % Area |
| 1            |      | 3.428 | 46053   | 15191  | 2.61   |
| 2            |      | 3.708 | 1718248 | 535248 | 97.39  |

**Supplementary Figure 233. HPLC Spectra of 36 obtained from (*S,R*)-L1.**

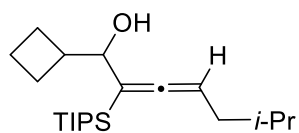

**Figure 3, entry 37**  
*(R,S)*-L1: 92% ee; *(S,R)*-L1: 92% ee  
**Auto-Scaled Chromatogram**

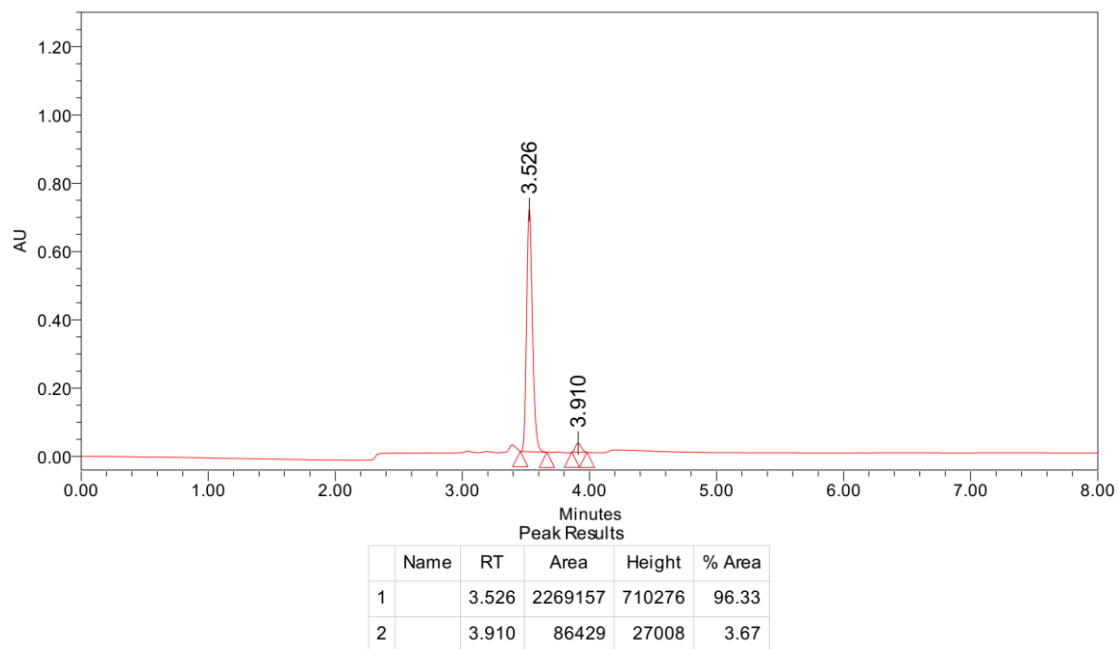

**Supplementary Figure 234. HPLC Spectra of 37 obtained from *(R,S)*-L1.**  
**Auto-Scaled Chromatogram**

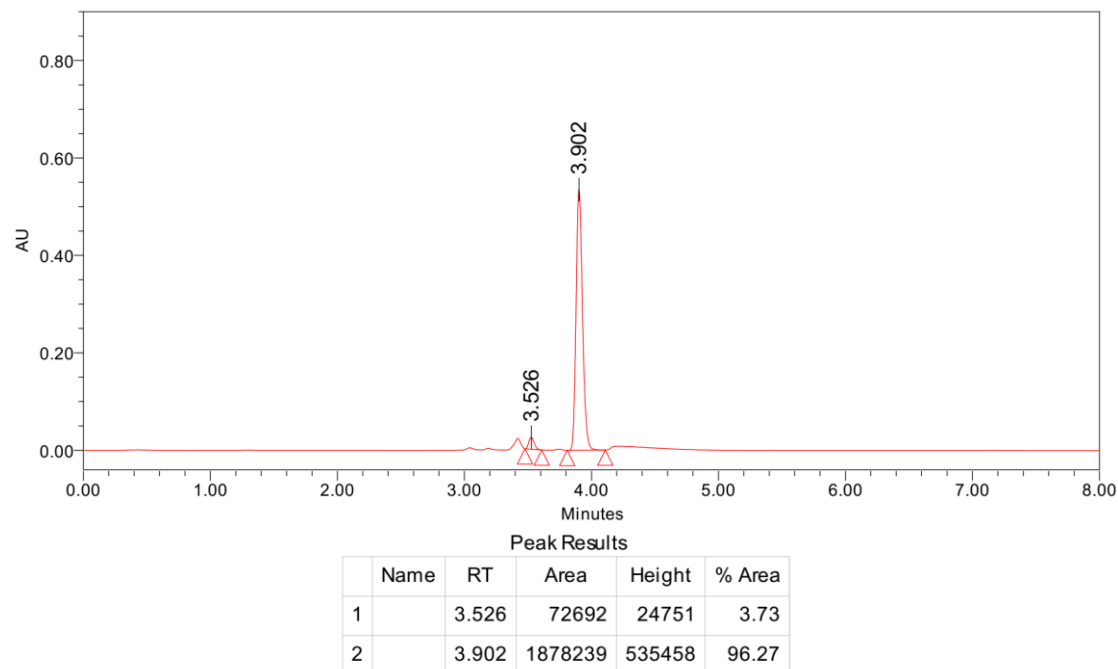

**Supplementary Figure 235. HPLC Spectra of 37 obtained from *(S,R)*-L1.**



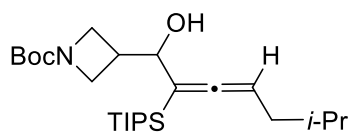

**Figure 3, entry 38**  
*(R,S)*-L1: 91% ee; *(S,R)*-L1: 91% ee  
**Auto-Scaled Chromatogram**

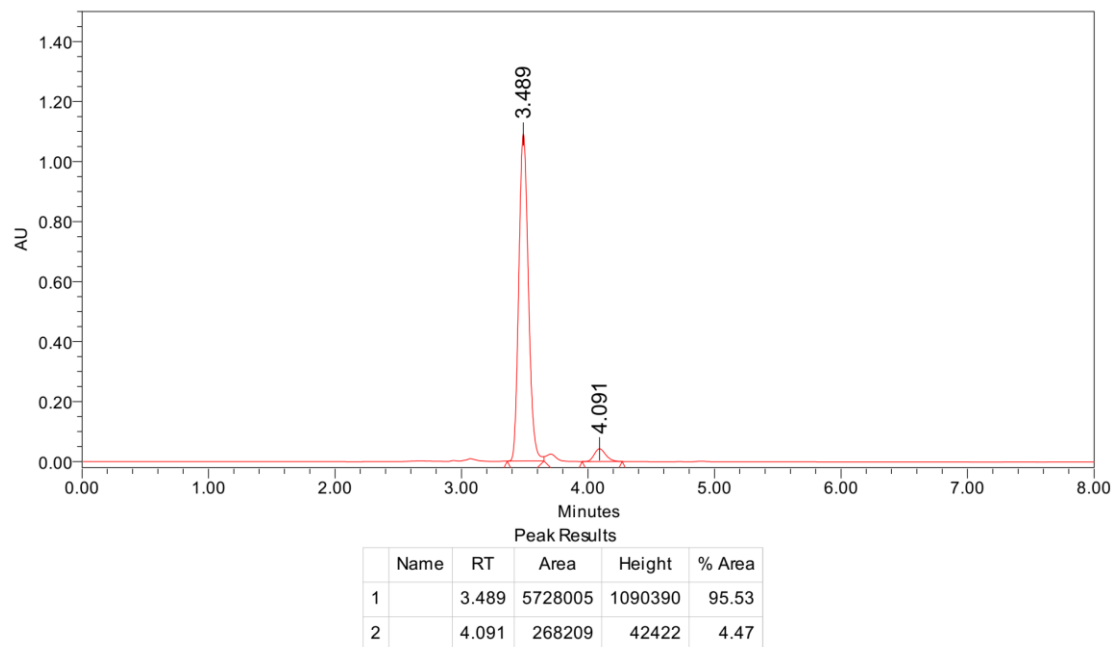

**Supplementary Figure 236. HPLC Spectra of 38 obtained from *(R,S)*-L1.**  
**Auto-Scaled Chromatogram**

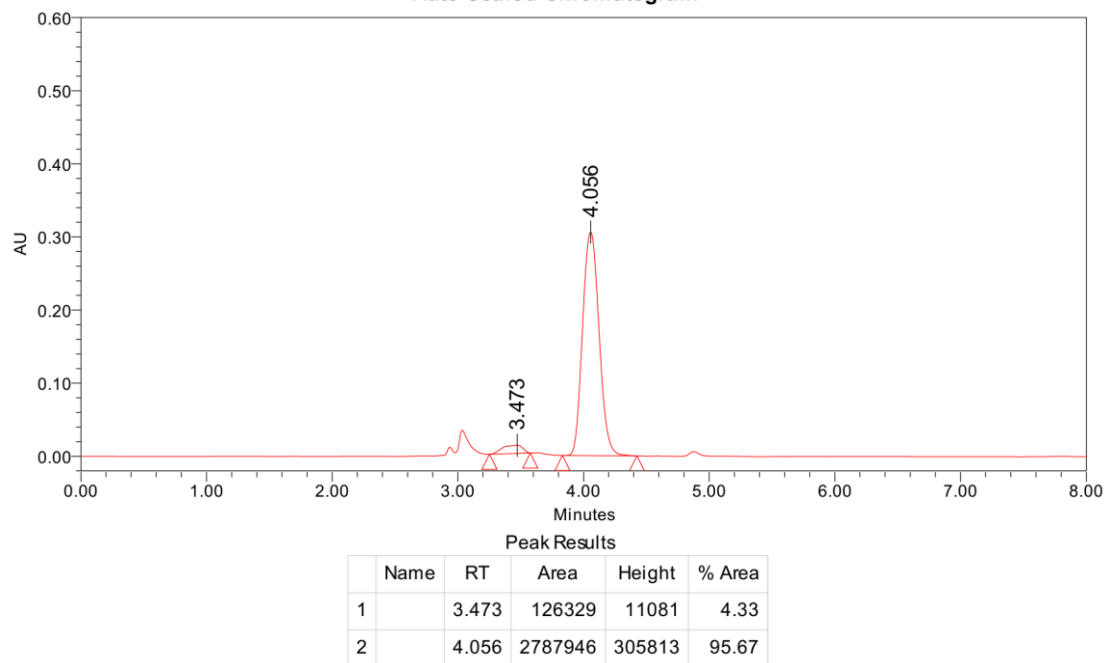

**Supplementary Figure 237. HPLC Spectra of 38 obtained from *(S,R)*-L1.**

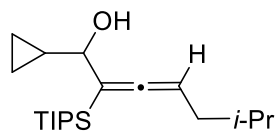

**Figure 3, entry 39**  
*(R,S)*-L1: 90% ee; *(S,R)*-L1: 90% ee

Auto-Scaled Chromatogram

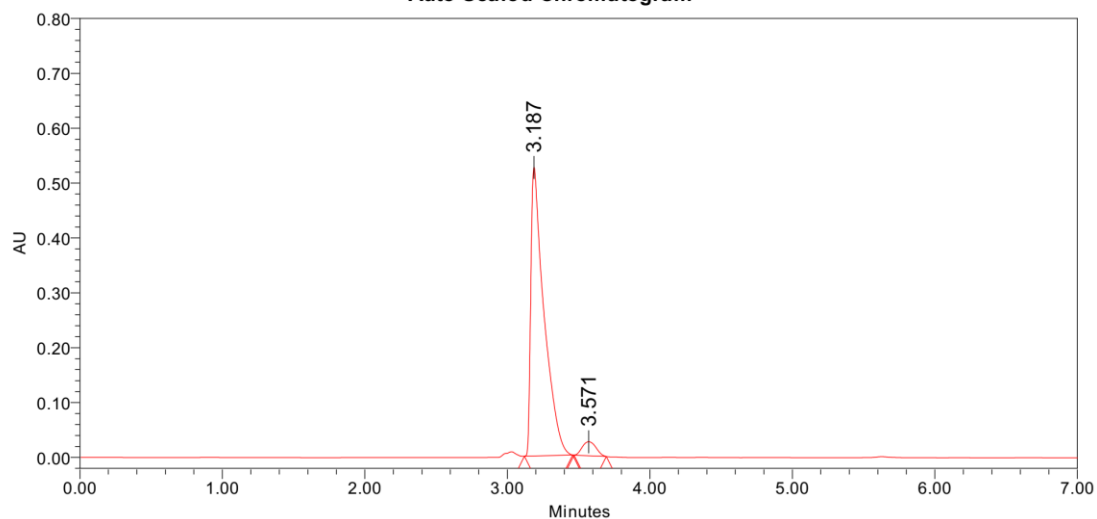

Peak Results

| Name | RT    | Area    | Height | % Area |
|------|-------|---------|--------|--------|
| 1    | 3.187 | 3384664 | 526509 | 95.20  |
| 2    | 3.571 | 170490  | 25435  | 4.80   |

**Supplementary Figure 238.** HPLC Spectra of **39** obtained from *(R,S)*-L1.

Auto-Scaled Chromatogram

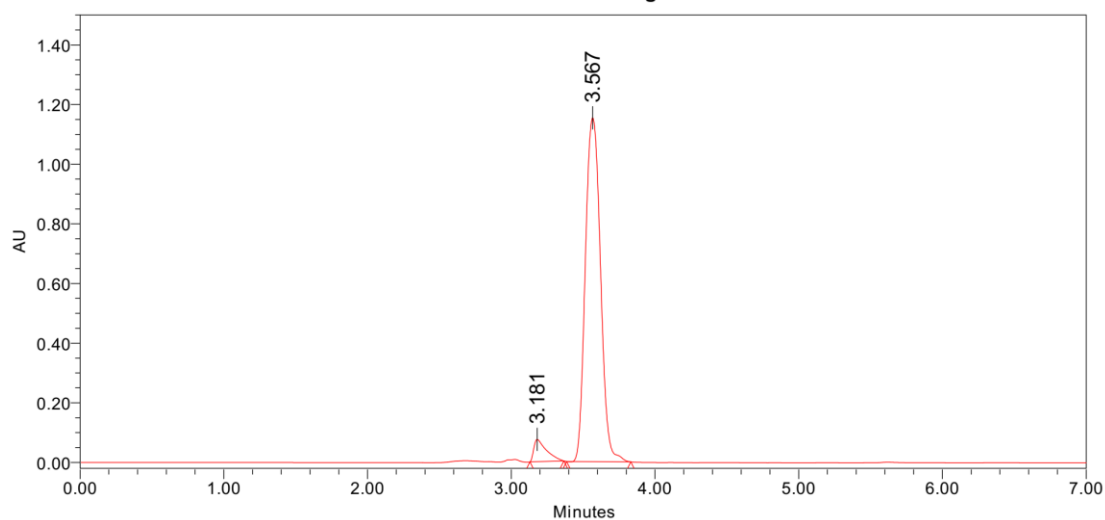

Peak Results

| Name | RT    | Area    | Height  | % Area |
|------|-------|---------|---------|--------|
| 1    | 3.181 | 451951  | 74741   | 5.08   |
| 2    | 3.567 | 8443701 | 1153028 | 94.92  |

**Supplementary Figure 239.** HPLC Spectra of **39** obtained from *(S,R)*-L1.

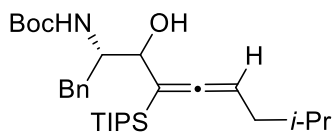

**Figure 3, entry 40&41**  
 (R,S)-L1: 1:99 dr; (S,R)-L1: 99:1 dr  
 Auto-Scaled Chromatogram

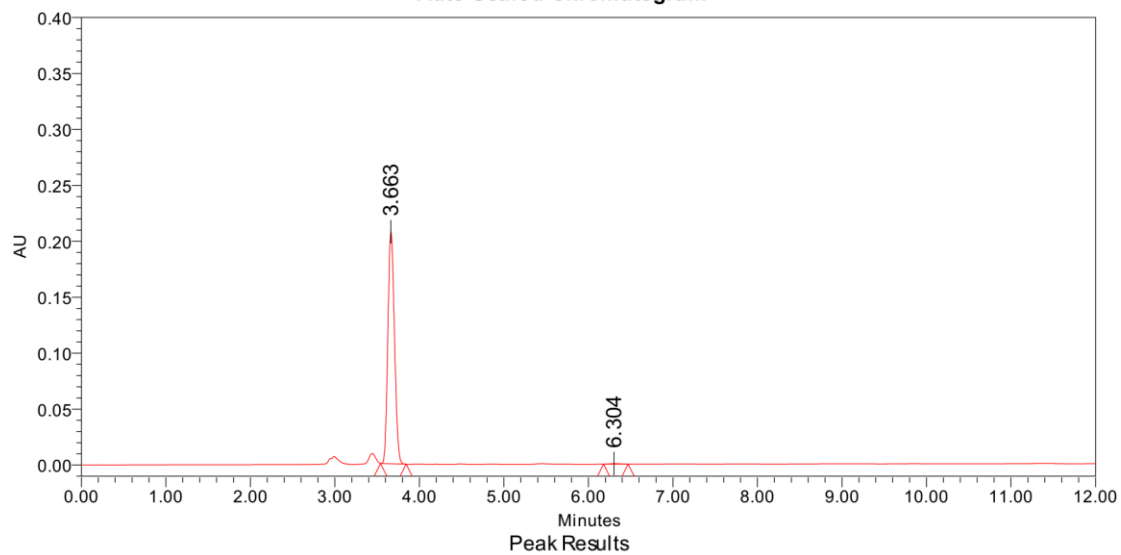

Peak Results

| Name | RT    | Area    | Height | % Area |
|------|-------|---------|--------|--------|
| 1    | 3.663 | 1124300 | 207415 | 99.69  |
| 2    | 6.304 | 3550    | 497    | 0.31   |

**Supplementary Figure 240. HPLC Spectra of 41 obtained from (R,S)-L1.**  
 Auto-Scaled Chromatogram

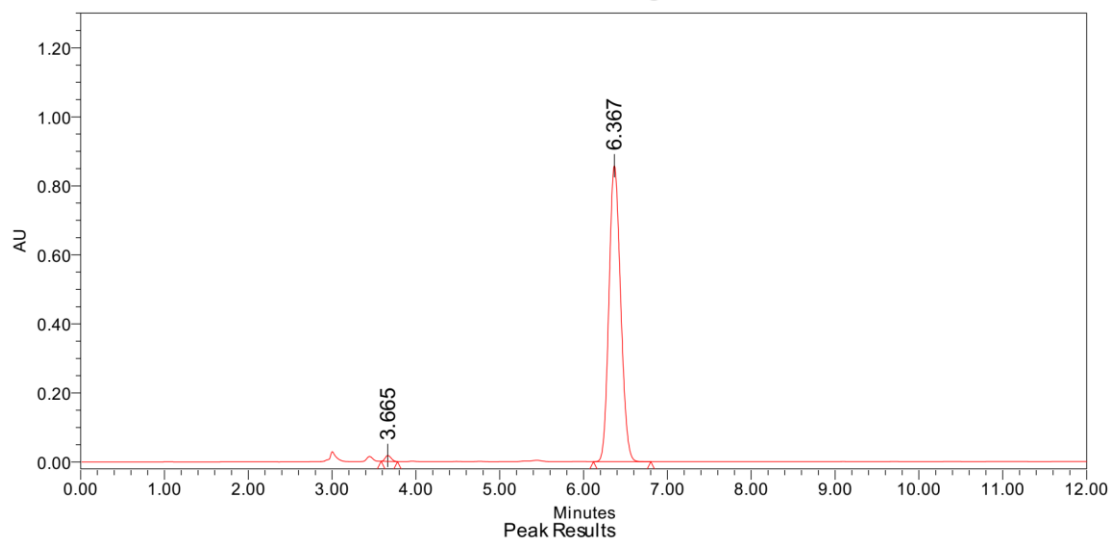

Peak Results

| Name | RT    | Area    | Height | % Area |
|------|-------|---------|--------|--------|
| 1    | 3.665 | 84728   | 17224  | 1.01   |
| 2    | 6.367 | 8292133 | 857282 | 98.99  |

**Supplementary Figure 241. HPLC Spectra of 40 obtained from (S,R)-L1.**

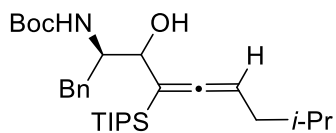

**Figure 3, entry 42&43**  
 (*R,S*)-L1: 1:99 dr; (*S,R*)-L1: 99:1 dr  
 Auto-Scaled Chromatogram

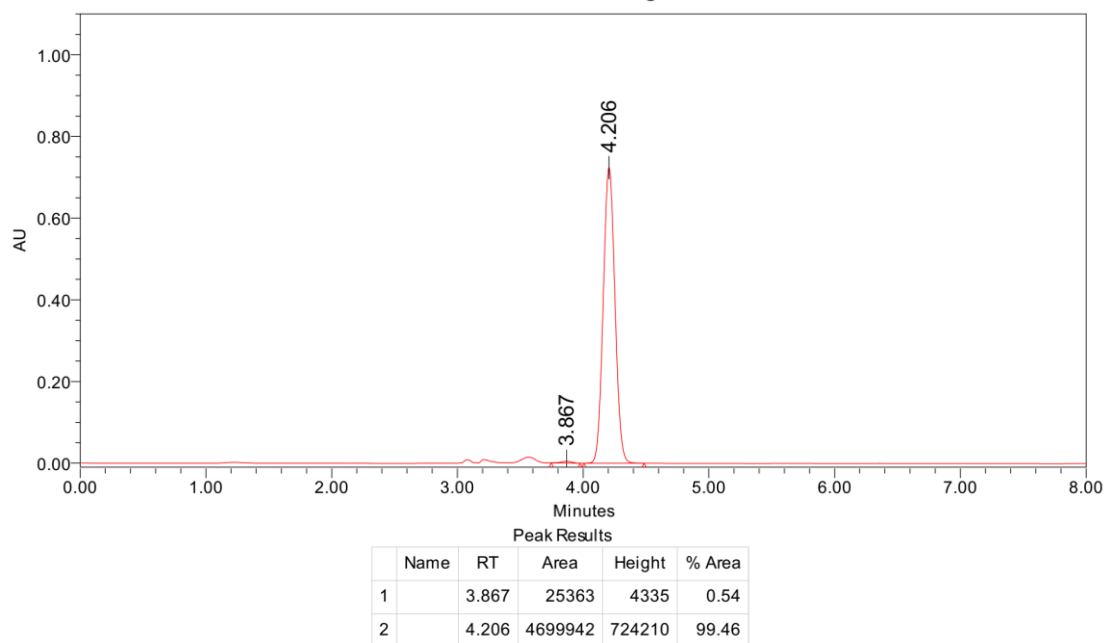

**Supplementary Figure 242. HPLC Spectra of 43 obtained from (*R,S*)-L1.**  
 Auto-Scaled Chromatogram

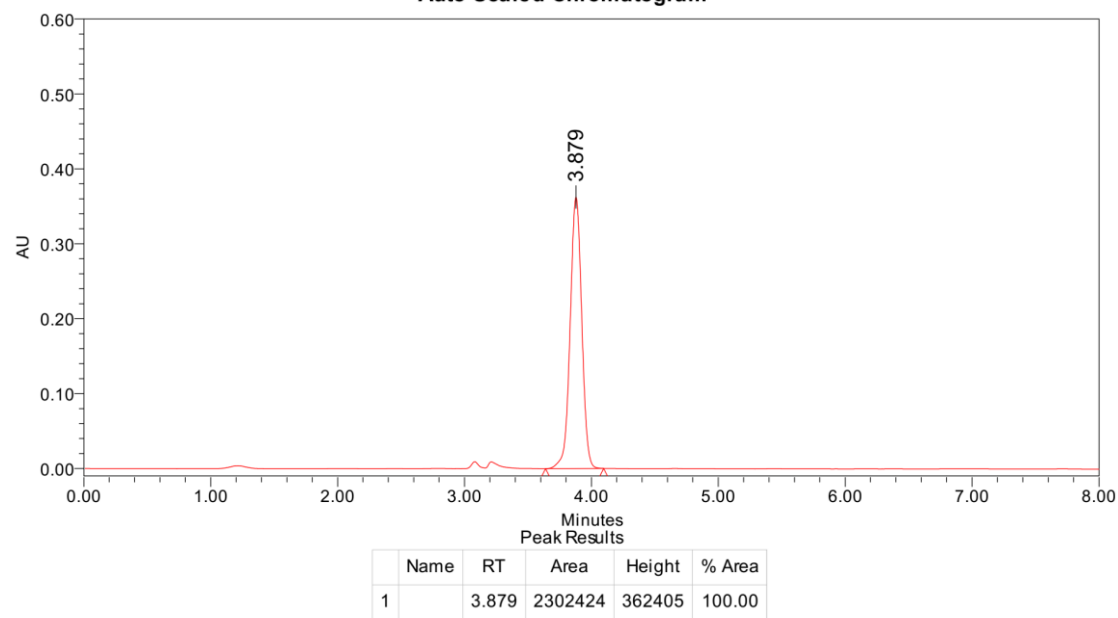

**Supplementary Figure 243. HPLC Spectra of 42 obtained from (*S,R*)-L1.**

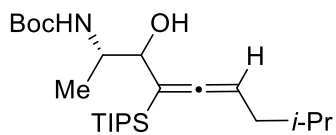

**Figure 3, entry 44&45**  
 (*R,S*)-L1: 1:99 dr; (*S,R*)-L1: 99:1 dr

**Auto-Scaled Chromatogram**

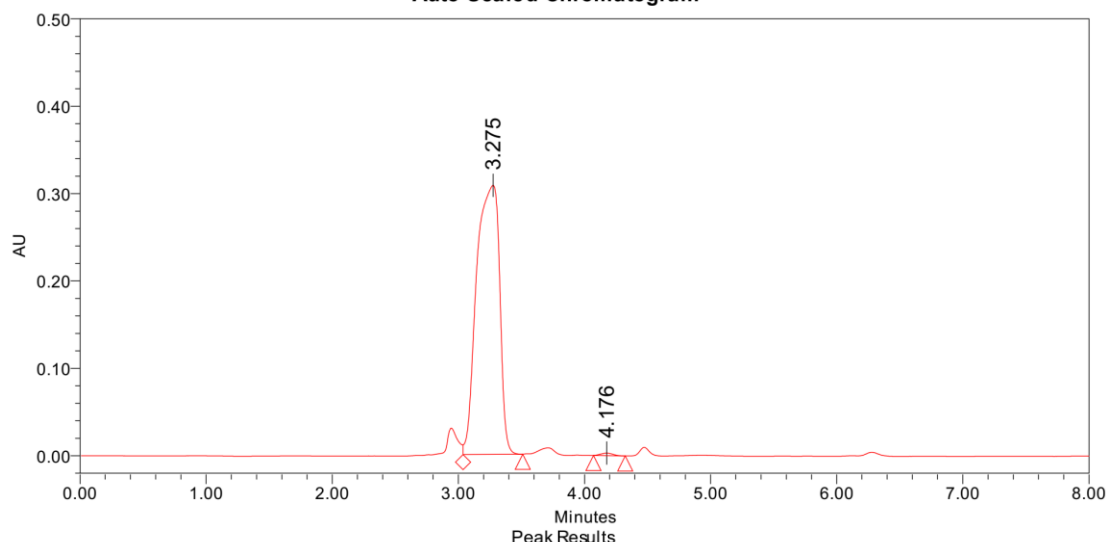

| Peak Results |       |         |        |        |
|--------------|-------|---------|--------|--------|
| Name         | RT    | Area    | Height | % Area |
| 1            | 3.275 | 3895746 | 307886 | 99.51  |
| 2            | 4.176 | 19097   | 2879   | 0.49   |

**Supplementary Figure 244.** HPLC Spectra of **45** obtained from (*R,S*)-L1.

**Auto-Scaled Chromatogram**

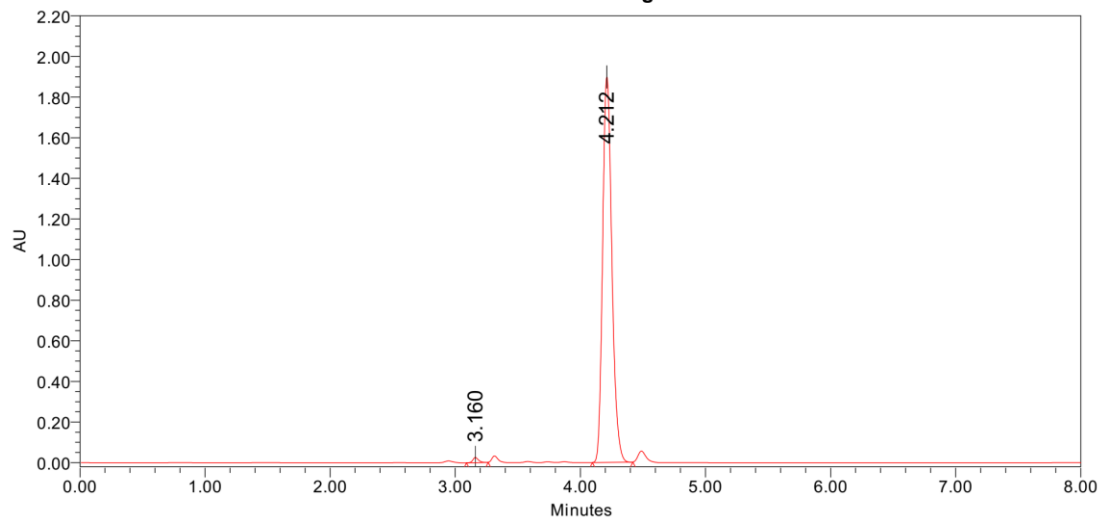

| Peak Results |       |         |         |        |
|--------------|-------|---------|---------|--------|
| Name         | RT    | Area    | Height  | % Area |
| 1            | 3.160 | 79037   | 25676   | 0.80   |
| 2            | 4.212 | 9758960 | 1898353 | 99.20  |

**Supplementary Figure 245.** HPLC Spectra of **44** obtained from (*S,R*)-L1.

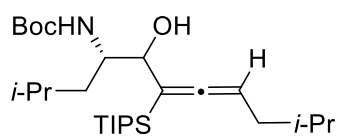

**Figure 3, entry 46&47**  
 (*R,S*)-L1: 1:99 dr; (*S,R*)-L1: 99:1 dr

**Auto-Scaled Chromatogram**

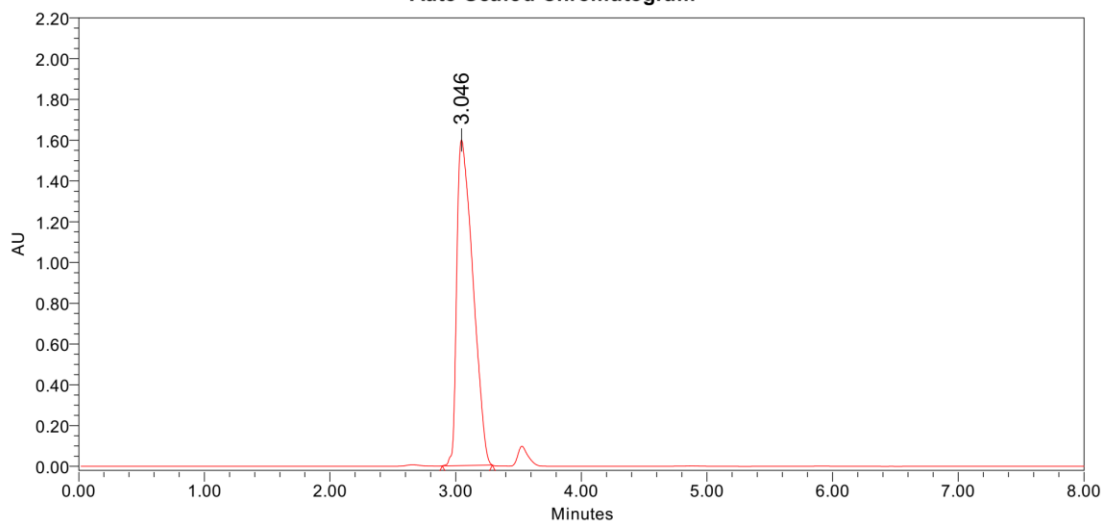

Peak Results

| Name | RT    | Area     | Height  | % Area |
|------|-------|----------|---------|--------|
| 1    | 3.046 | 14272518 | 1596958 | 100.00 |

**Supplementary Figure 246. HPLC Spectra of 47 obtained from (*R,S*)-L1.**

**Auto-Scaled Chromatogram**

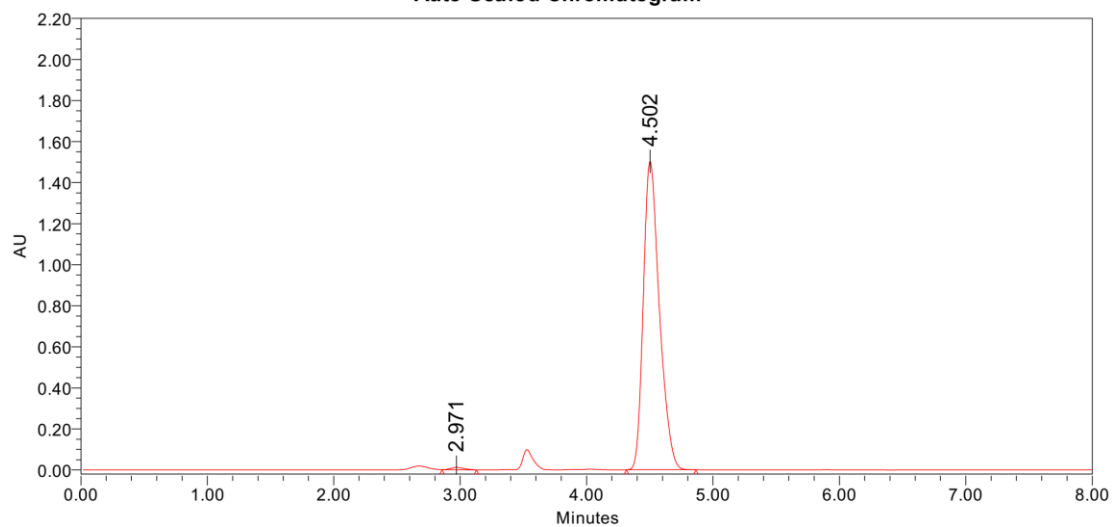

Peak Results

| Name | RT    | Area     | Height  | % Area |
|------|-------|----------|---------|--------|
| 1    | 2.971 | 84266    | 12516   | 0.63   |
| 2    | 4.502 | 13296432 | 1503037 | 99.37  |

**Supplementary Figure 247. HPLC Spectra of 46 obtained from (*S,R*)-L1.**

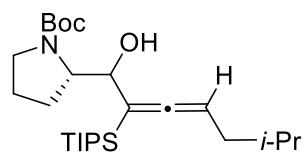

**Figure 3, entry 48&49**  
*(R,S)*-L1: 1:99 dr; *(S,R)*-L1: 99:1 dr

**Auto-Scaled Chromatogram**

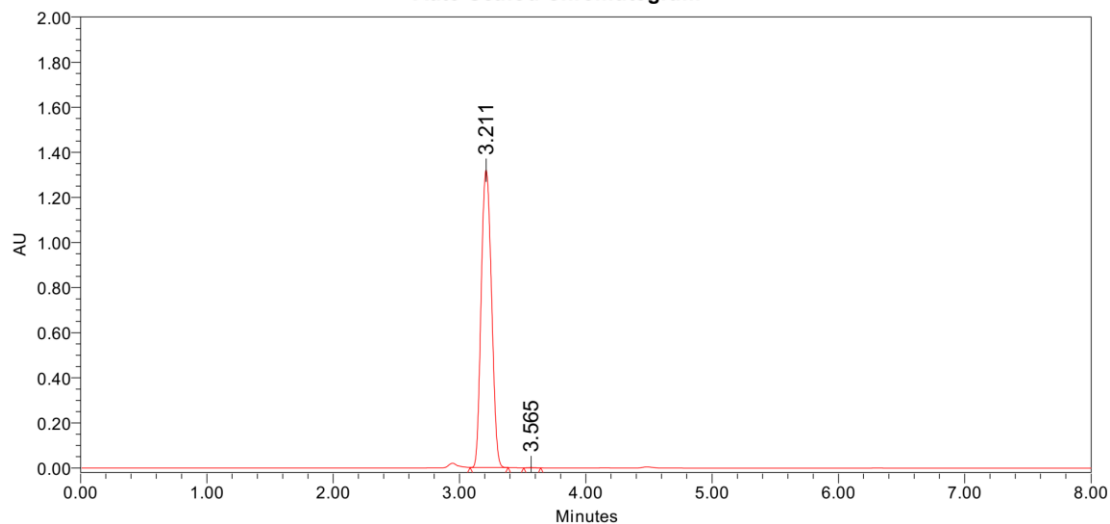

**Peak Results**

| Name | RT    | Area    | Height  | % Area |
|------|-------|---------|---------|--------|
| 1    | 3.211 | 7508554 | 1319417 | 99.94  |
| 2    | 3.565 | 4745    | 1117    | 0.06   |

**Supplementary Figure 248. HPLC Spectra of 49 obtained from *(R,S)*-L1.**

**Auto-Scaled Chromatogram**

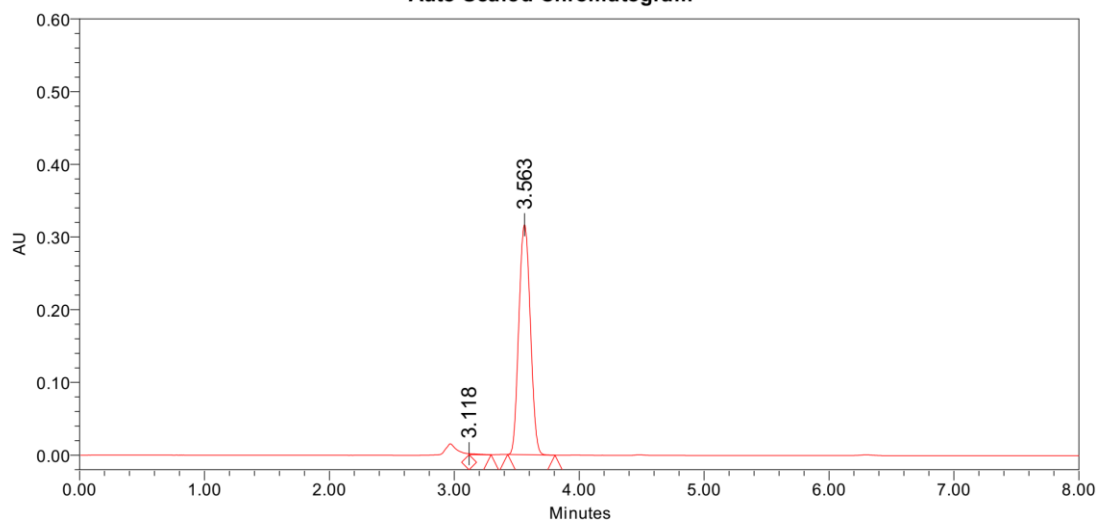

**Peak Results**

| Name | RT    | Area    | Height | % Area |
|------|-------|---------|--------|--------|
| 1    | 3.118 | 8056    | 1502   | 0.40   |
| 2    | 3.563 | 2027654 | 316364 | 99.60  |

**Supplementary Figure 249. HPLC Spectra of 48 obtained from *(S,R)*-L1.**

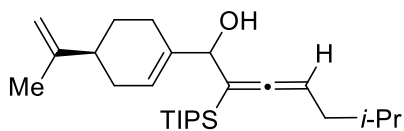

**Figure 3, entry 50&51**  
 (*R,S*)-L1: 1:99 dr; (*S,R*)-L1: 99:1 dr

**Auto-Scaled Chromatogram**

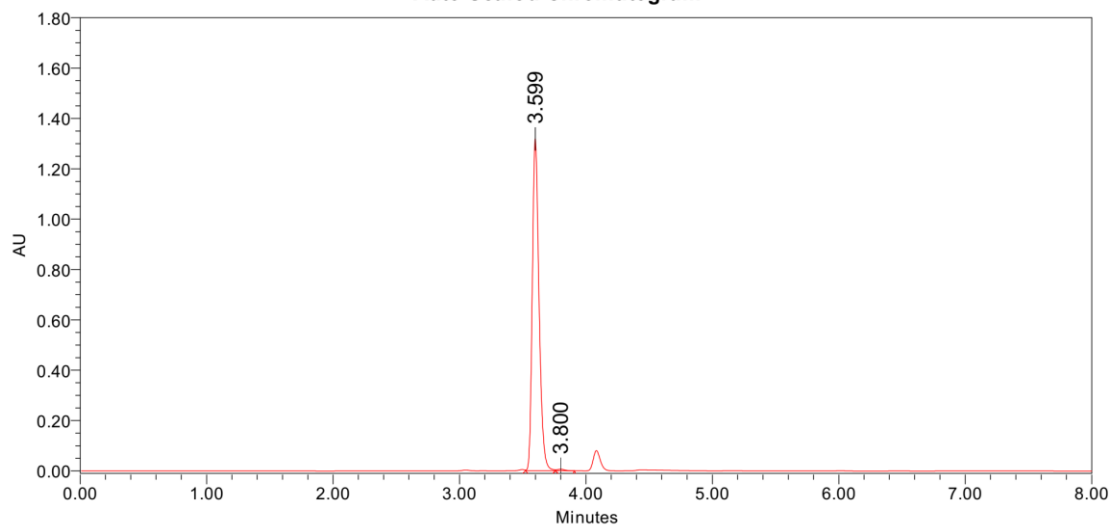

**Peak Results**

| Name | RT    | Area    | Height  | % Area |
|------|-------|---------|---------|--------|
| 1    | 3.599 | 4879196 | 1318740 | 99.45  |
| 2    | 3.800 | 27009   | 6288    | 0.55   |

**Supplementary Figure 250. HPLC Spectra of 51 obtained from (*R,S*)-L1.**

**Auto-Scaled Chromatogram**

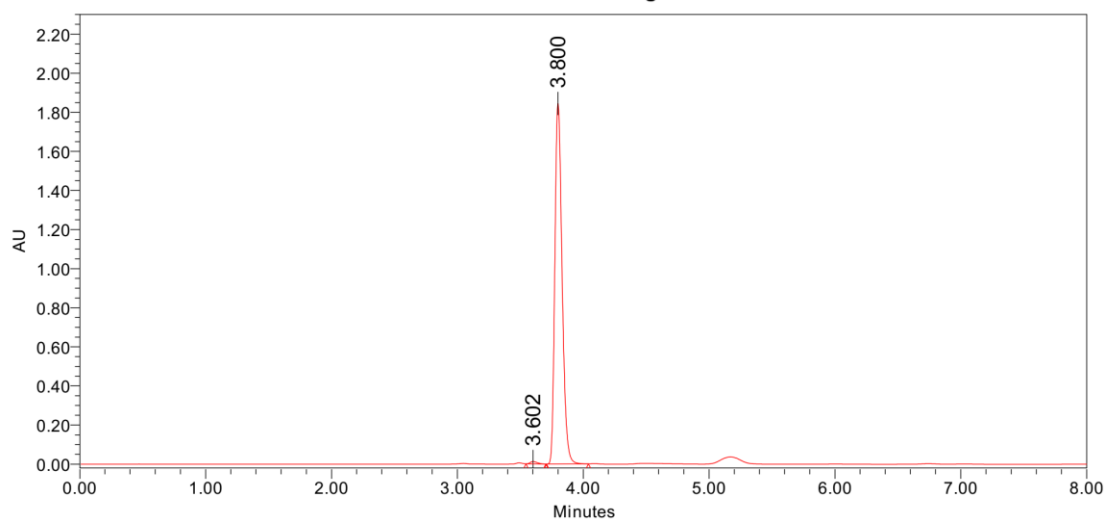

**Peak Results**

| Name | RT    | Area    | Height  | % Area |
|------|-------|---------|---------|--------|
| 1    | 3.602 | 47956   | 12759   | 0.65   |
| 2    | 3.800 | 7383653 | 1845111 | 99.35  |

**Supplementary Figure 251. HPLC Spectra of 50 obtained from (*S,R*)-L1.**



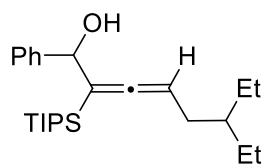

**Figure 4, entry 52**  
 (*R,S*)-L1: 95% ee; (*S,R*)-L1: 94% ee

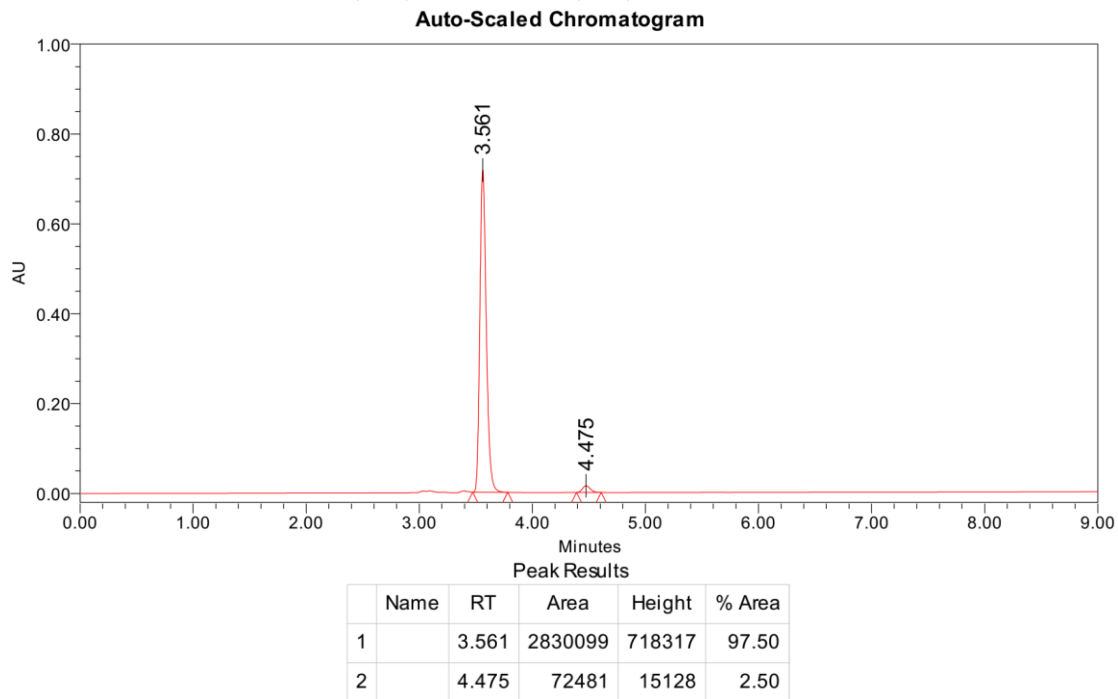

**Supplementary Figure 252. HPLC Spectra of 52 obtained from (*R,S*)-L1.**  
**Auto-Scaled Chromatogram**

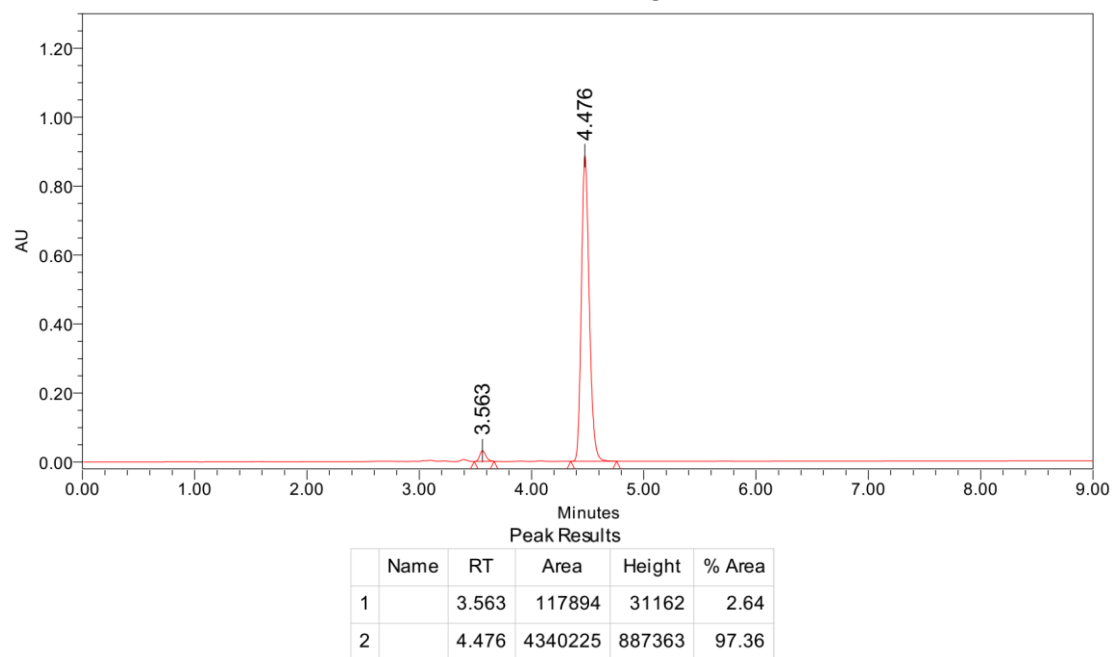

**Supplementary Figure 253. HPLC Spectra of 52 obtained from (*S,R*)-L1.**

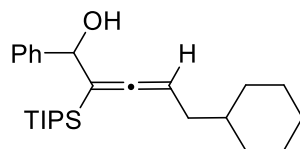

**Figure 4, entry 53**  
*(R,S)*-L1: 95% ee; *(S,R)*-L1: 94% ee

Auto-Scaled Chromatogram

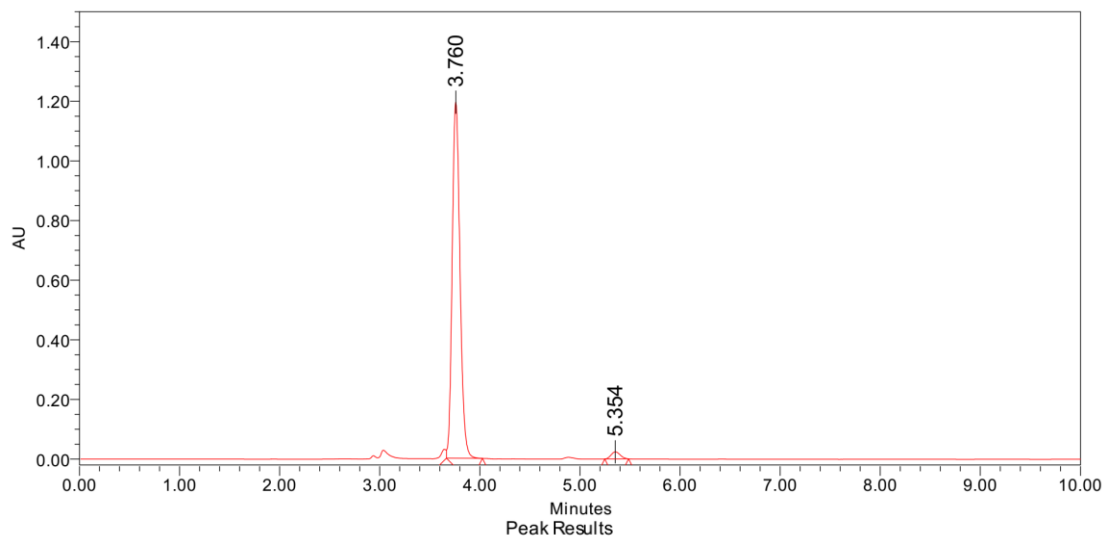

| Peak Results |       |         |         |        |
|--------------|-------|---------|---------|--------|
| Name         | RT    | Area    | Height  | % Area |
| 1            | 3.760 | 6468501 | 1194509 | 97.75  |
| 2            | 5.354 | 149214  | 24007   | 2.25   |

**Supplementary Figure 254.** HPLC Spectra of **53** obtained from *(R,S)*-L1.

Auto-Scaled Chromatogram

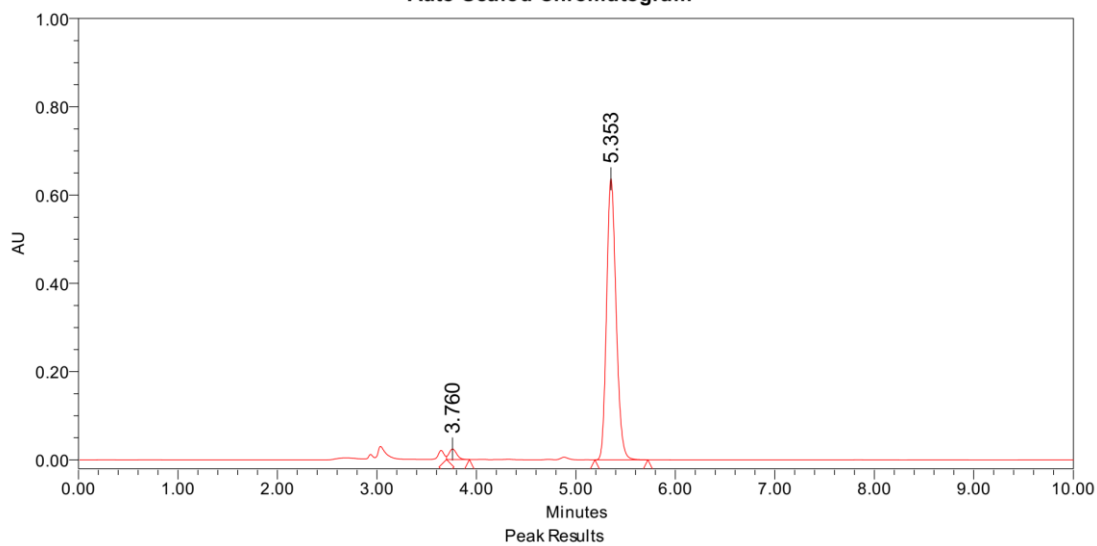

| Peak Results |       |         |        |        |
|--------------|-------|---------|--------|--------|
| Name         | RT    | Area    | Height | % Area |
| 1            | 3.760 | 127102  | 23783  | 2.92   |
| 2            | 5.353 | 4231705 | 636971 | 97.08  |

**Supplementary Figure 255.** HPLC Spectra of **53** obtained from *(S,R)*-L1.

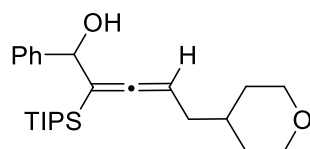

**Figure 4, entry 54**  
*(R,S)*-L1: 93% ee; *(S,R)*-L1: 92% ee  
**Auto-Scaled Chromatogram**

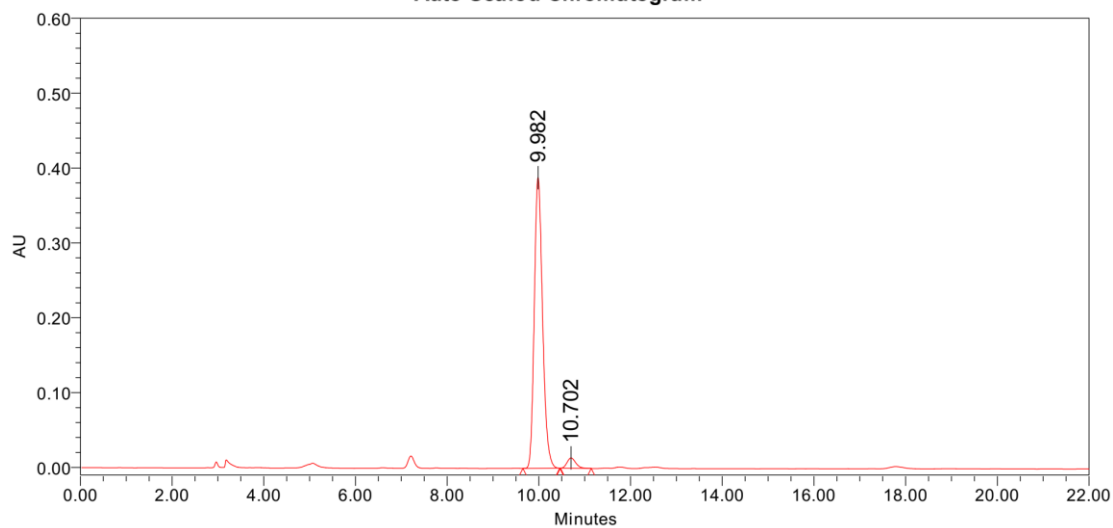

Peak Results

| Name | RT     | Area    | Height | % Area |
|------|--------|---------|--------|--------|
| 1    | 9.982  | 4873025 | 388276 | 96.42  |
| 2    | 10.702 | 181114  | 13755  | 3.58   |

**Supplementary Figure 256. HPLC Spectra of 54 obtained from *(R,S)*-L1.**  
**Auto-Scaled Chromatogram**

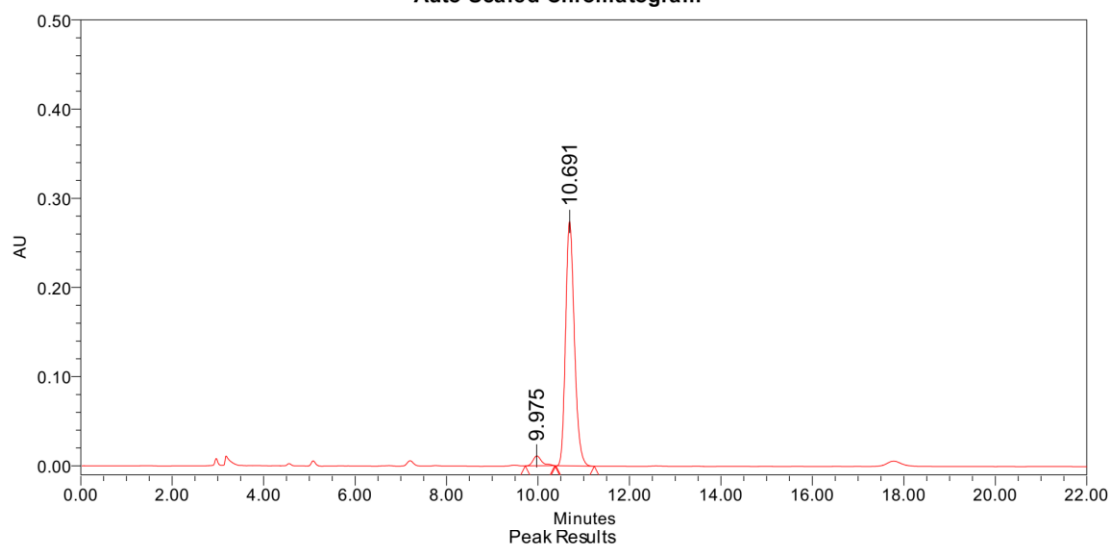

Peak Results

| Name | RT     | Area    | Height | % Area |
|------|--------|---------|--------|--------|
| 1    | 9.975  | 147553  | 11060  | 3.87   |
| 2    | 10.691 | 3669125 | 274420 | 96.13  |

**Supplementary Figure 257. HPLC Spectra of 54 obtained from *(S,R)*-L1.**

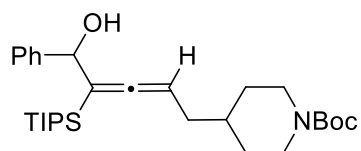

**Figure 4, entry 55**  
*(R,S)*-L1: 92% ee; *(S,R)*-L1: 92% ee

Auto-Scaled Chromatogram

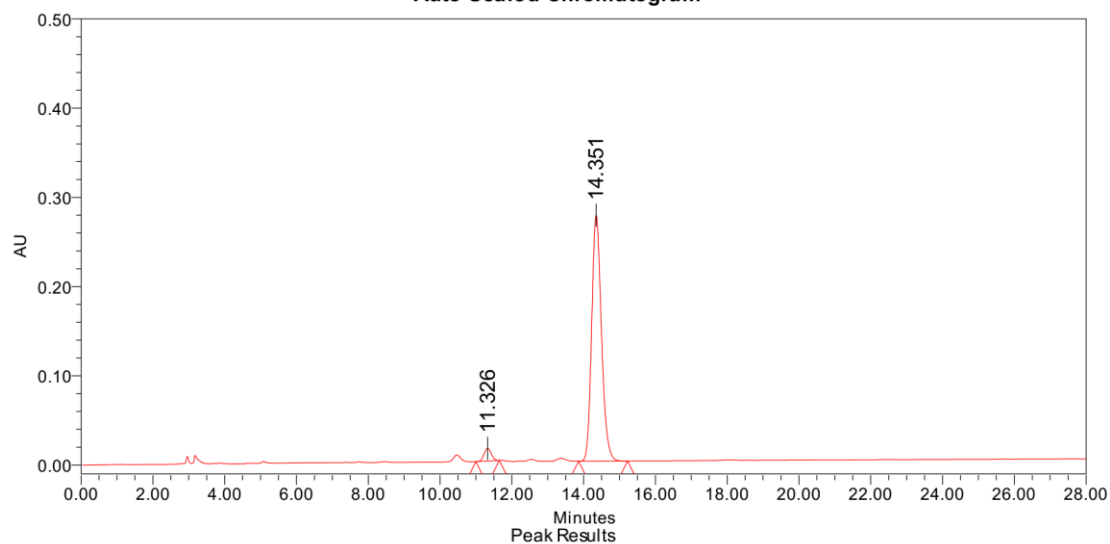

| Peak Results |        |         |        |        |
|--------------|--------|---------|--------|--------|
| Name         | RT     | Area    | Height | % Area |
| 1            | 11.326 | 196998  | 14080  | 3.65   |
| 2            | 14.351 | 5200502 | 275746 | 96.35  |

**Supplementary Figure 258.** HPLC Spectra of **55** obtained from *(R,S)*-L1.

Auto-Scaled Chromatogram

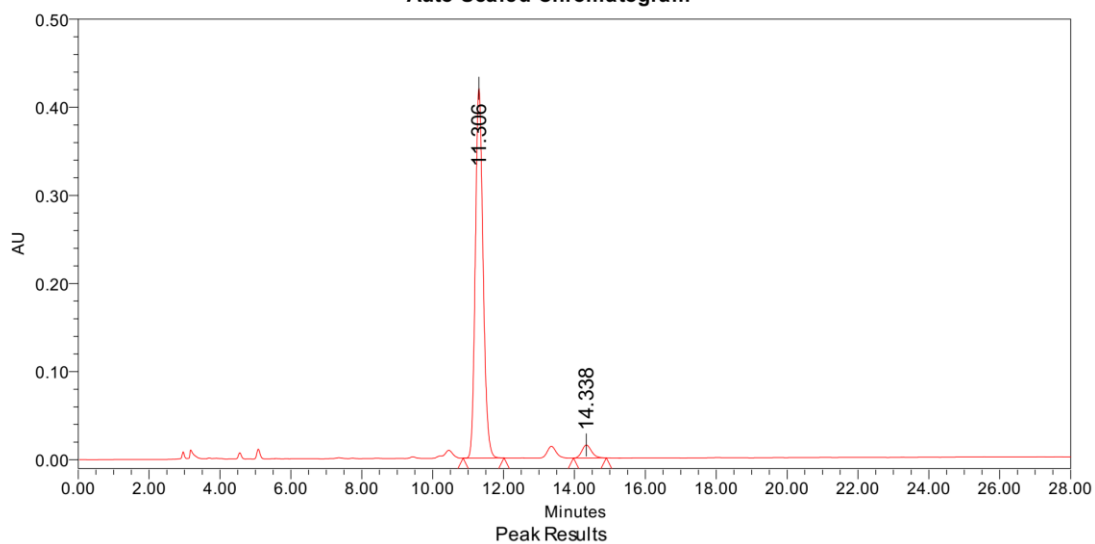

| Peak Results |        |         |        |        |
|--------------|--------|---------|--------|--------|
| Name         | RT     | Area    | Height | % Area |
| 1            | 11.306 | 6357551 | 419787 | 95.87  |
| 2            | 14.338 | 273631  | 14697  | 4.13   |

**Supplementary Figure 259.** HPLC Spectra of **55** obtained from *(S,R)*-L1.

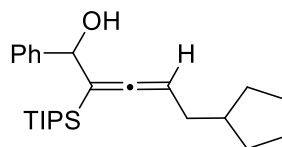

**Figure 4, entry 56**  
*(R,S)*-L1: 95% ee; *(S,R)*-L1: 95% ee  
**Auto-Scaled Chromatogram**

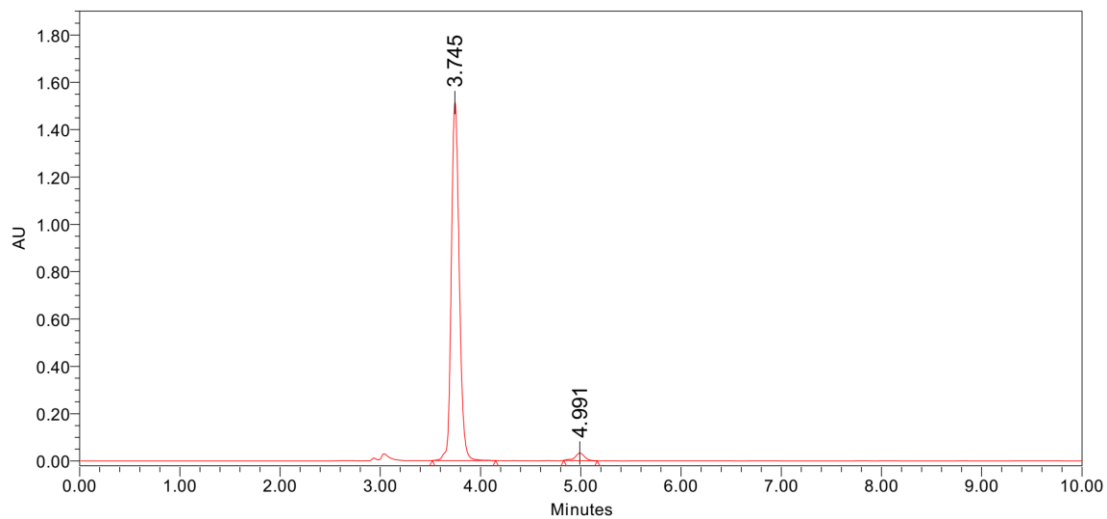

Peak Results

| Name | RT    | Area    | Height  | % Area |
|------|-------|---------|---------|--------|
| 1    | 3.745 | 8340223 | 1512821 | 97.56  |
| 2    | 4.991 | 209005  | 31804   | 2.44   |

**Supplementary Figure 260. HPLC Spectra of 56 obtained from *(R,S)*-L1.**  
**Auto-Scaled Chromatogram**

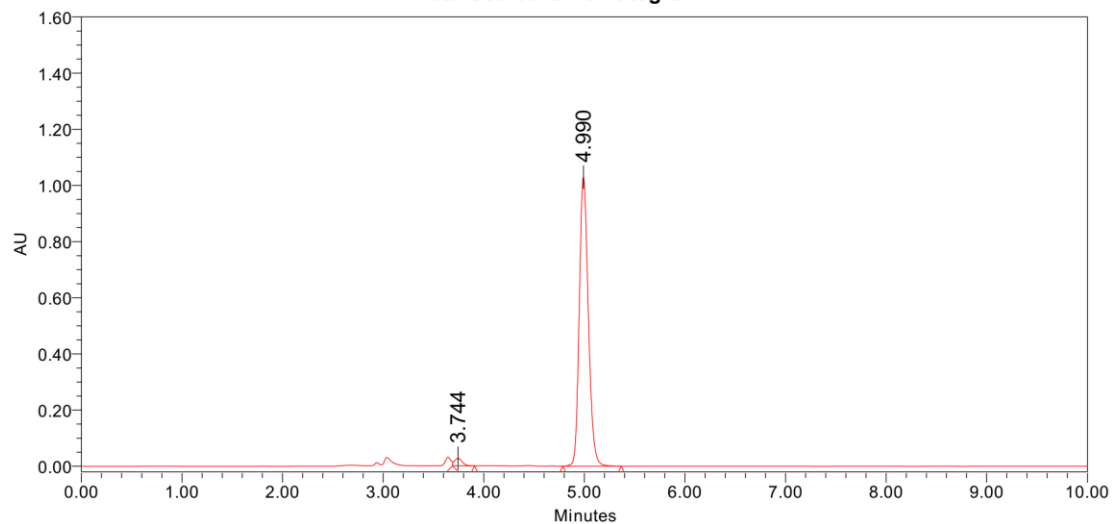

Peak Results

| Name | RT    | Area    | Height  | % Area |
|------|-------|---------|---------|--------|
| 1    | 3.744 | 144966  | 26732   | 2.21   |
| 2    | 4.990 | 6428520 | 1029375 | 97.79  |

**Supplementary Figure 261. HPLC Spectra of 56 obtained from *(S,R)*-L1.**

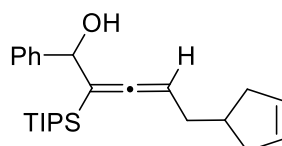

**Figure 4, entry 57**  
*(R,S)*-L1: 92% ee; *(S,R)*-L1: 94% ee

**Auto-Scaled Chromatogram**

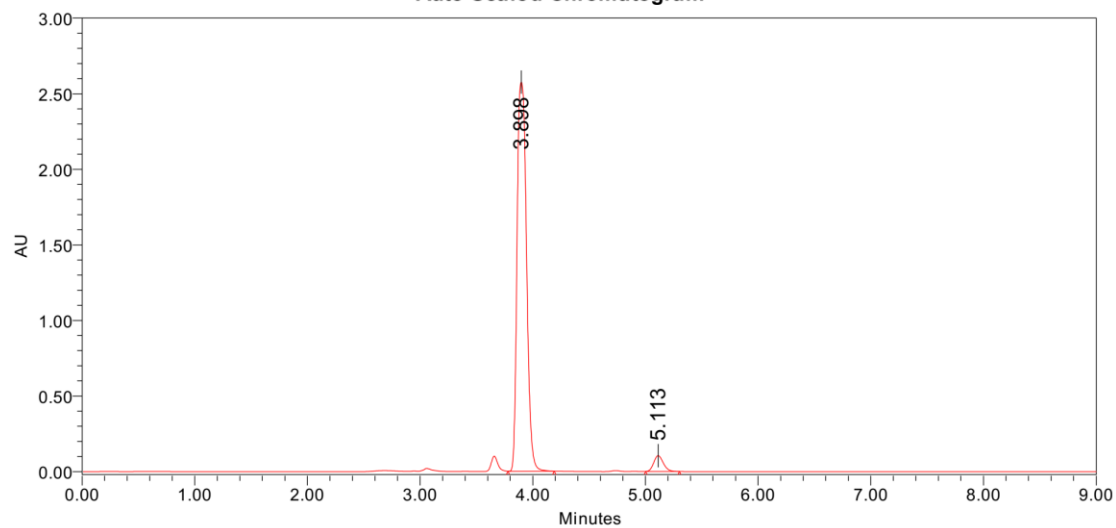

**Peak Results**

| Name | RT    | Area     | Height  | % Area |
|------|-------|----------|---------|--------|
| 1    | 3.898 | 14899476 | 2574716 | 96.00  |
| 2    | 5.113 | 620935   | 104949  | 4.00   |

**Supplementary Figure 262. HPLC Spectra of 57 obtained from *(R,S)*-L1.**

**Auto-Scaled Chromatogram**

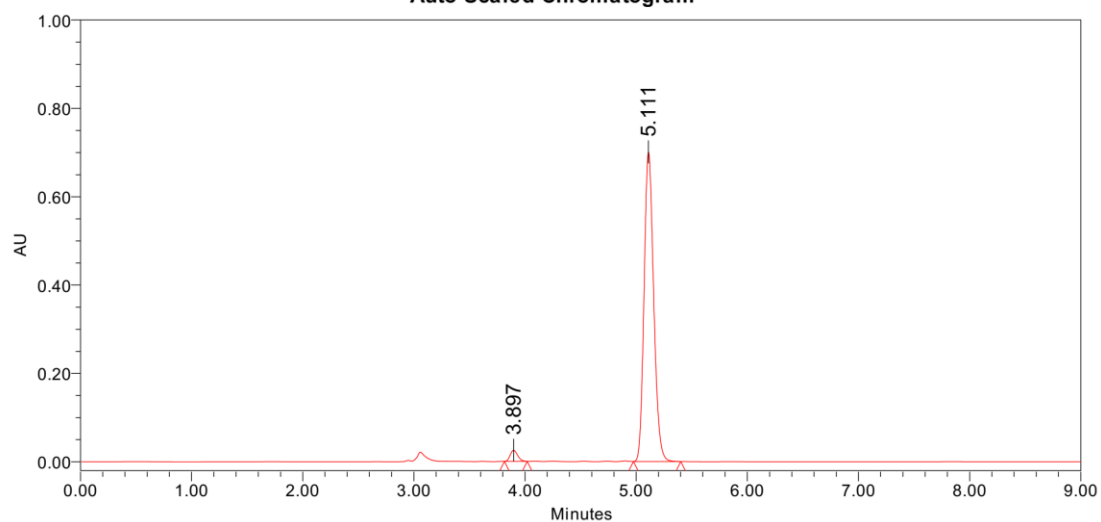

**Peak Results**

| Name | RT    | Area    | Height | % Area |
|------|-------|---------|--------|--------|
| 1    | 3.897 | 117184  | 25126  | 2.70   |
| 2    | 5.111 | 4220003 | 701229 | 97.30  |

**Supplementary Figure 263. HPLC Spectra of 57 obtained from *(S,R)*-L1.**

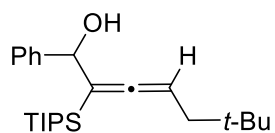

**Figure 4, entry 58**  
*(R,S)*-L1: 96% ee; *(S,R)*-L1: 96% ee  
**Auto-Scaled Chromatogram**

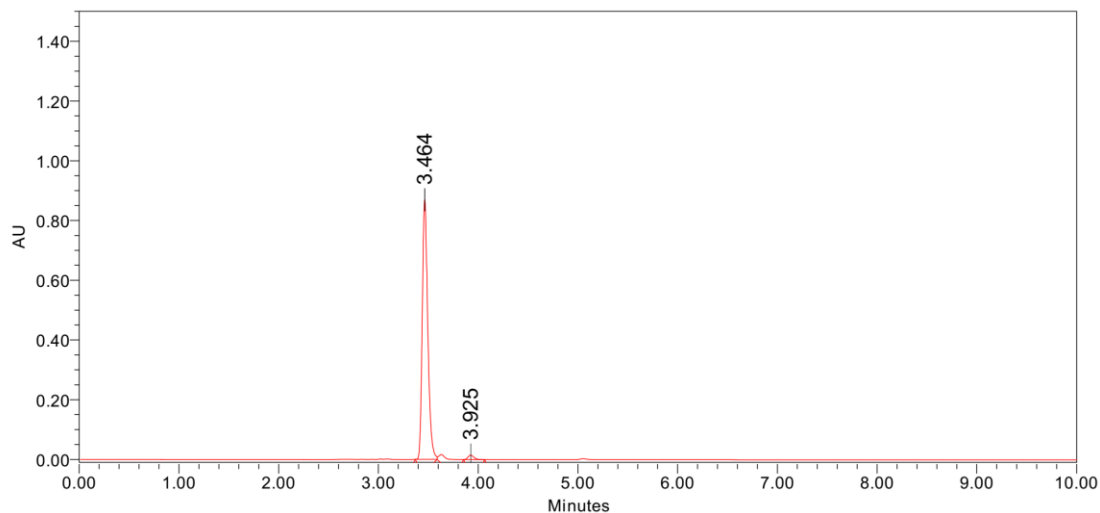

Peak Results

| Name | RT    | Area    | Height | % Area |
|------|-------|---------|--------|--------|
| 1    | 3.464 | 3348832 | 869627 | 98.16  |
| 2    | 3.925 | 62743   | 15055  | 1.84   |

**Supplementary Figure 264.** HPLC Spectra of **58** obtained from *(R,S)*-L1.  
**Auto-Scaled Chromatogram**

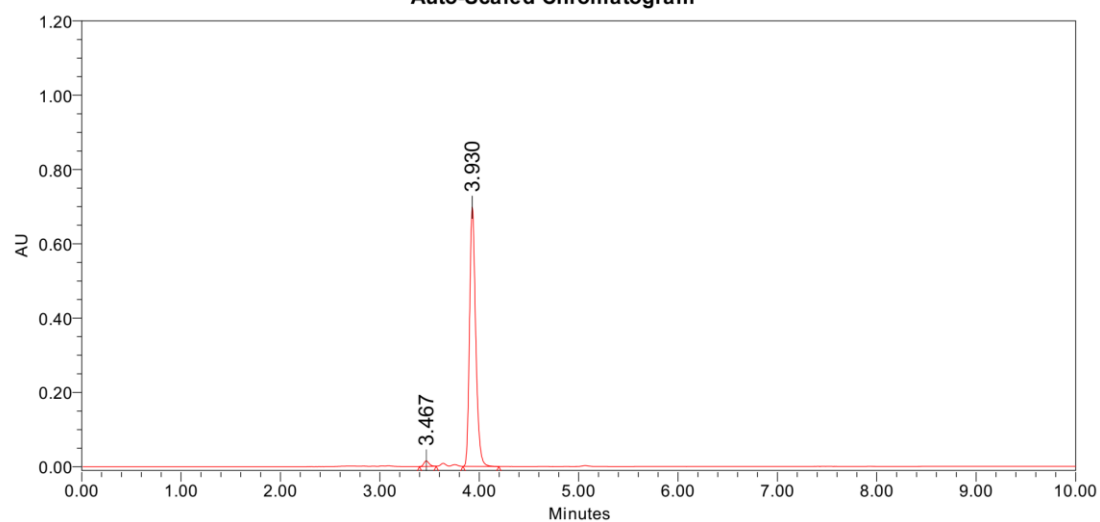

Peak Results

| Name | RT    | Area    | Height | % Area |
|------|-------|---------|--------|--------|
| 1    | 3.467 | 53653   | 14870  | 1.75   |
| 2    | 3.930 | 3004184 | 697841 | 98.25  |

**Supplementary Figure 265.** HPLC Spectra of **58** obtained from *(S,R)*-L1.

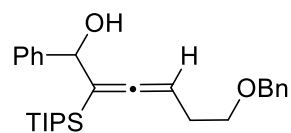

**Figure 4, entry 59a**  
 (*R,S*)-L1: 84% ee; (*S,R*)-L1: 86% ee

**Auto-Scaled Chromatogram**

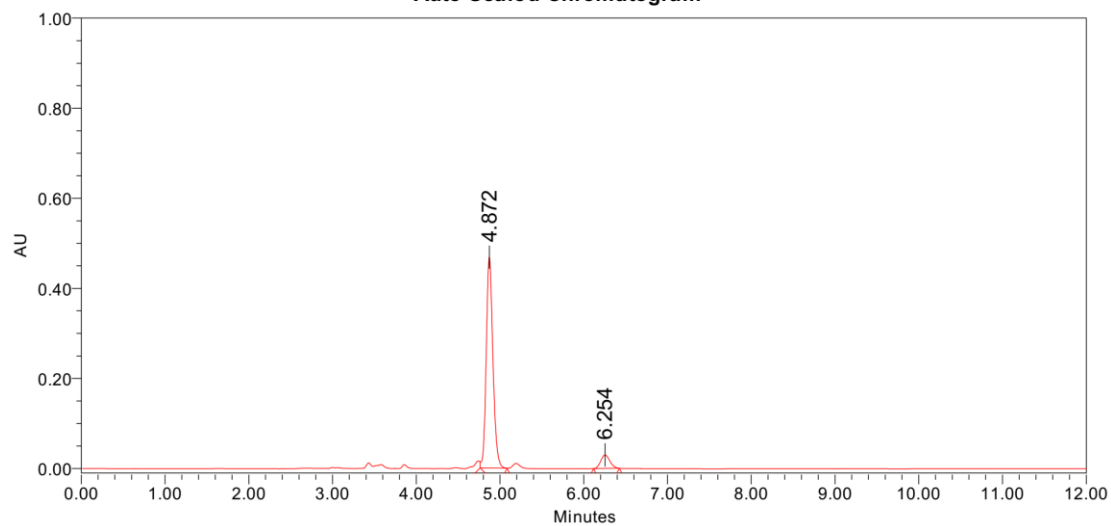

**Peak Results**

| Name | RT    | Area    | Height | % Area |
|------|-------|---------|--------|--------|
| 1    | 4.872 | 2598801 | 468475 | 92.02  |
| 2    | 6.254 | 225324  | 30044  | 7.98   |

**Supplementary Figure 266.** HPLC Spectra of **59a** obtained from (*R,S*)-L1.

**Auto-Scaled Chromatogram**

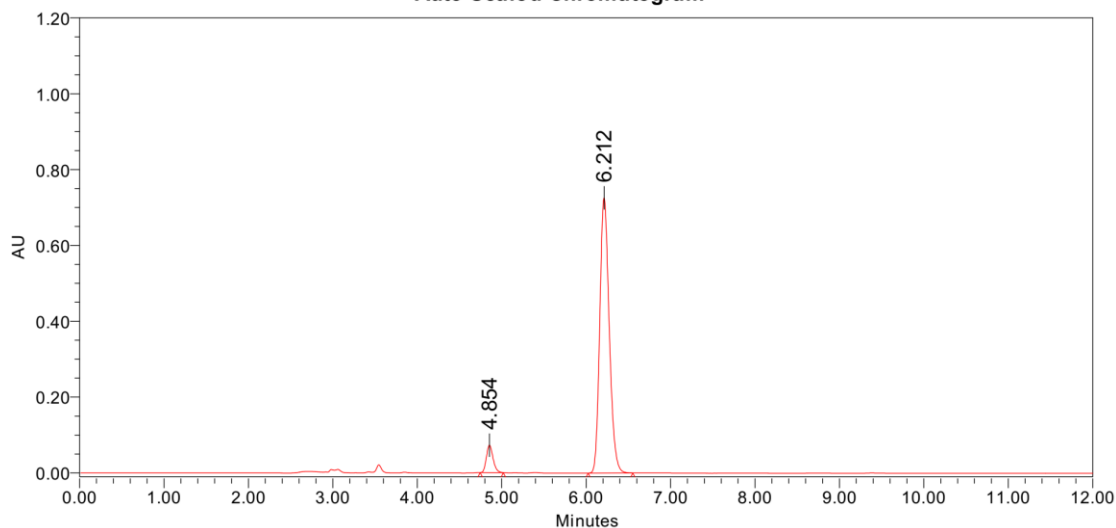

**Peak Results**

| Name | RT    | Area    | Height | % Area |
|------|-------|---------|--------|--------|
| 1    | 4.854 | 396352  | 72446  | 6.56   |
| 2    | 6.212 | 5643888 | 725764 | 93.44  |

**Supplementary Figure 267.** HPLC Spectra of **59a** obtained from (*S,R*)-L1.



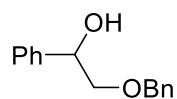

**Figure 4, entry 59b**  
 (*R,S*)-L1: 76% ee; (*S,R*)-L1: 76% ee

**Auto-Scaled Chromatogram**

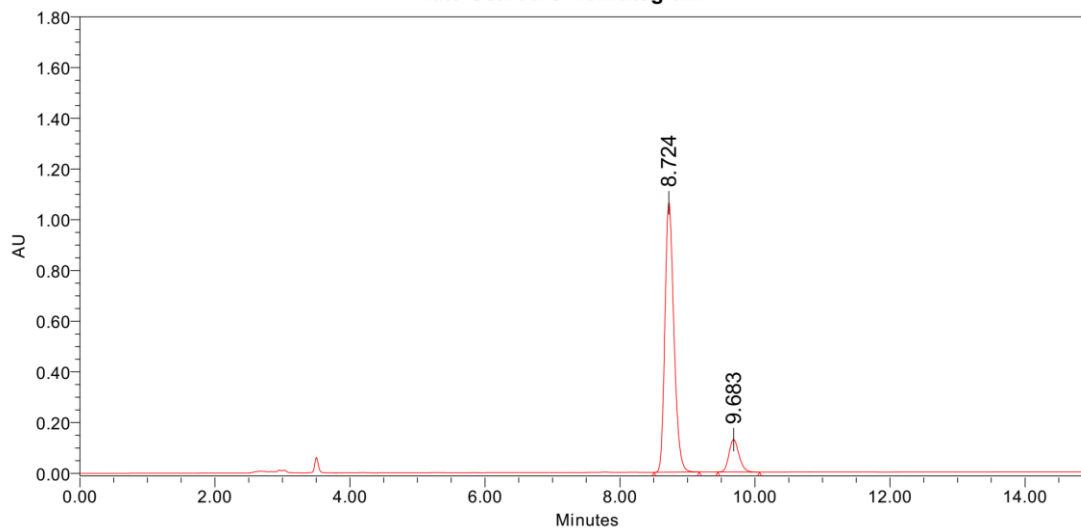

**Peak Results**

| Name | RT    | Area    | Height  | % Area |
|------|-------|---------|---------|--------|
| 1    | 8.724 | 9894257 | 1063151 | 88.20  |
| 2    | 9.683 | 1323733 | 128231  | 11.80  |

**Supplementary Figure 268.** HPLC Spectra of **59b** obtained from (*R,S*)-L1.

**Auto-Scaled Chromatogram**

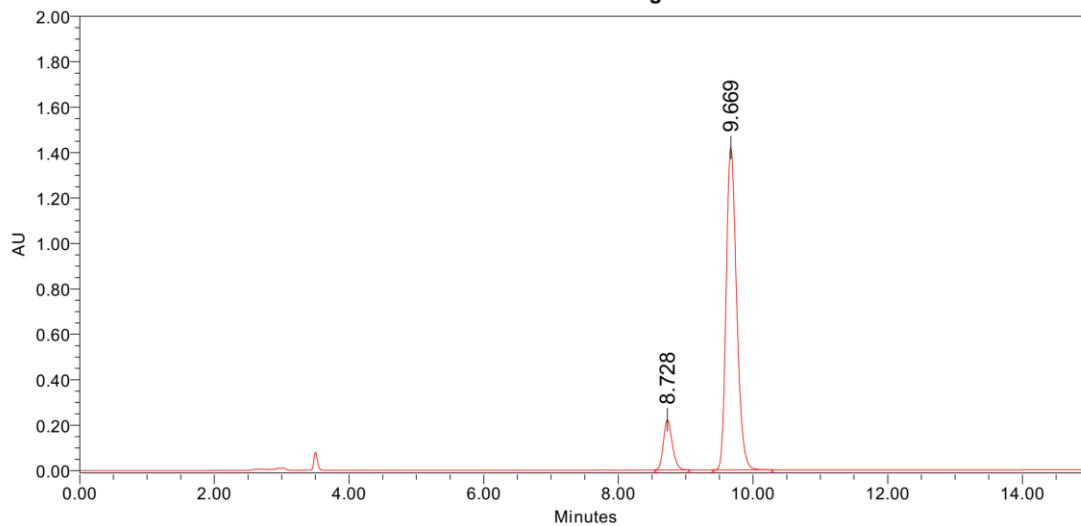

**Peak Results**

| Name | RT    | Area     | Height  | % Area |
|------|-------|----------|---------|--------|
| 1    | 8.728 | 2010941  | 220887  | 11.65  |
| 2    | 9.669 | 15250177 | 1418681 | 88.35  |

**Supplementary Figure 269.** HPLC Spectra of **59b** obtained from (*S,R*)-L1.

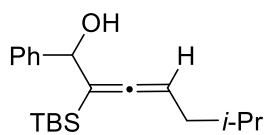

**Figure 4, entry 60**  
 (*R,S*)-L1: 92% ee; (*S,R*)-L1: 91% ee  
 Auto-Scaled Chromatogram

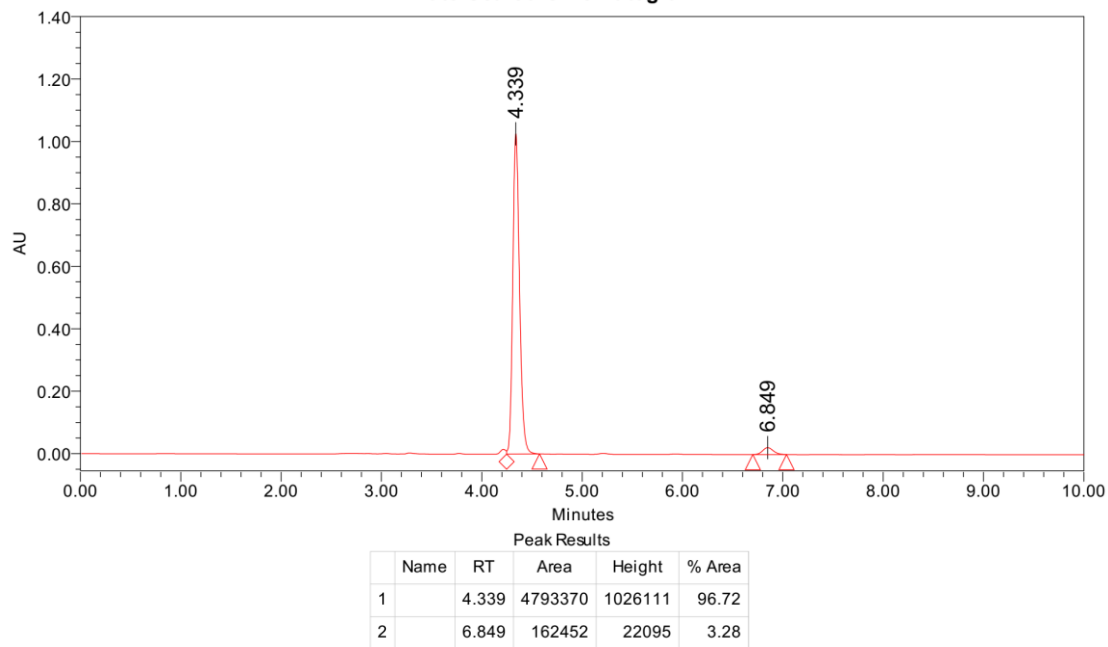

**Supplementary Figure 270. HPLC Spectra of 60 obtained from (*R,S*)-L1.**  
 Auto-Scaled Chromatogram

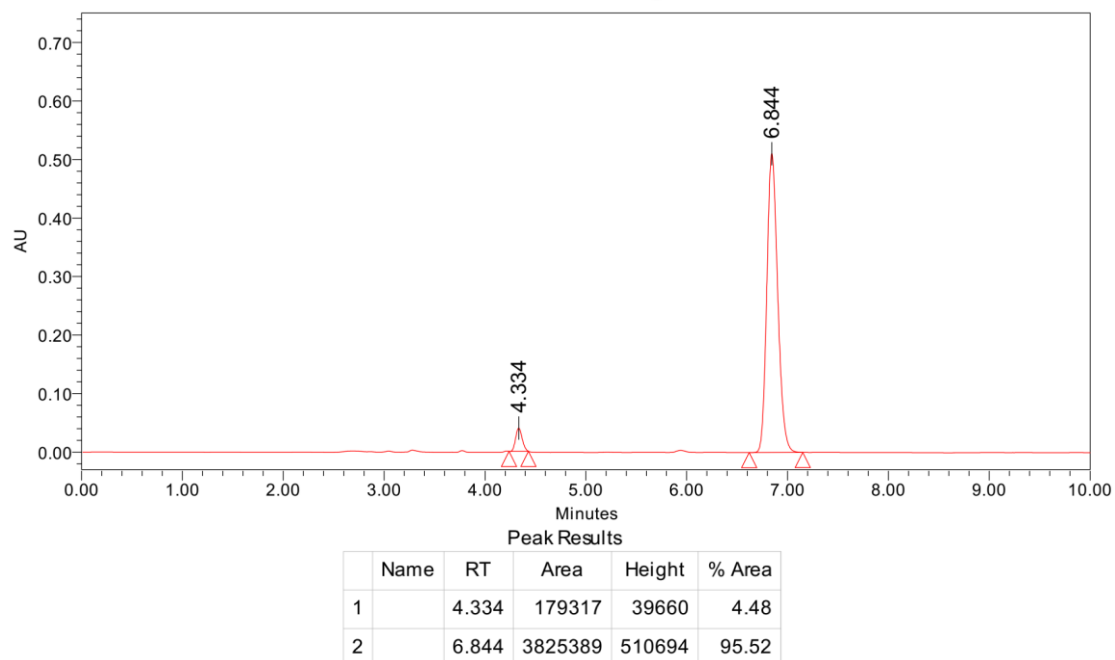

**Supplementary Figure 271. HPLC Spectra of 60 obtained from (*S,R*)-L1.**

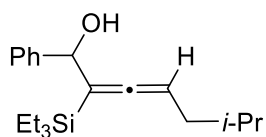

**Figure 4, entry 61**  
 (*R,S*)-L1: 93% ee; (*S,R*)-L1: 94% ee

**Auto-Scaled Chromatogram**

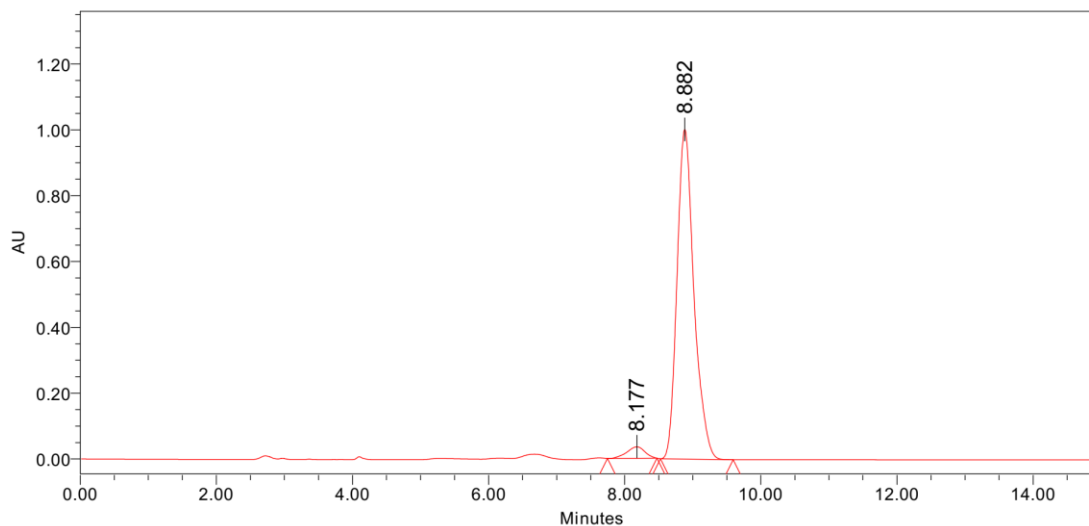

**Peak Results**

| Name | RT    | Area     | Height  | % Area |
|------|-------|----------|---------|--------|
| 1    | 8.177 | 644633   | 34920   | 3.59   |
| 2    | 8.882 | 17299569 | 1001574 | 96.41  |

**Supplementary Figure 272. HPLC Spectra of 61 obtained from (*R,S*)-L1.**

**Auto-Scaled Chromatogram**

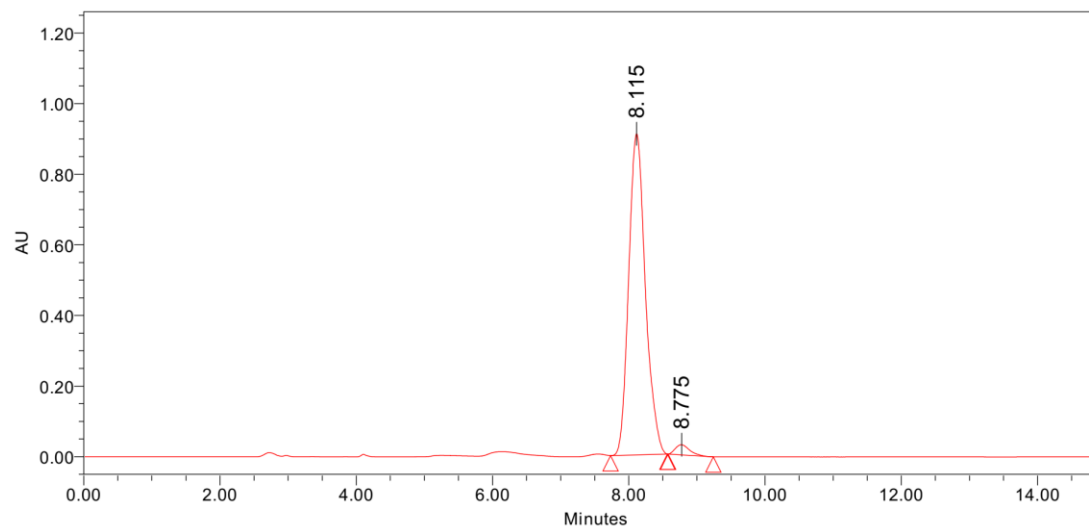

**Peak Results**

| Name | RT    | Area     | Height | % Area |
|------|-------|----------|--------|--------|
| 1    | 8.115 | 15487292 | 909516 | 97.37  |
| 2    | 8.775 | 418478   | 28765  | 2.63   |

**Supplementary Figure 273. HPLC Spectra of 61 obtained from (*S,R*)-L1.**

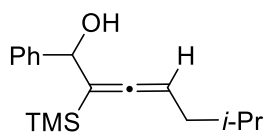

**Figure 4, entry 62**  
*(R,S)*-L1: 95% ee; *(S,R)*-L1: 95% ee

Auto-Scaled Chromatogram

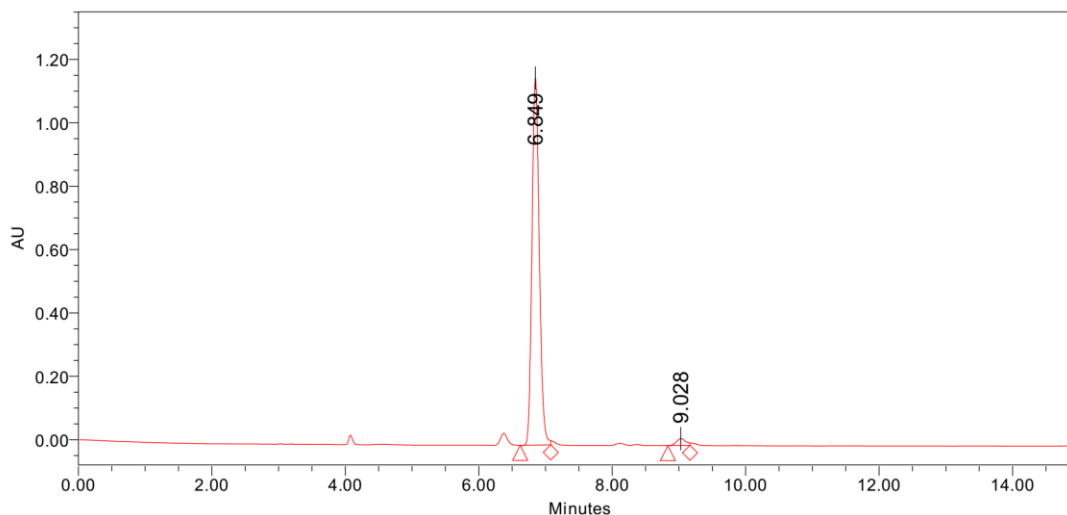

Peak Results

| Name | RT    | Area    | Height  | % Area |
|------|-------|---------|---------|--------|
| 1    | 6.849 | 8762743 | 1159239 | 97.69  |
| 2    | 9.028 | 207308  | 21236   | 2.31   |

**Supplementary Figure 274.** HPLC Spectra of **62** obtained from *(R,S)*-L1.

Auto-Scaled Chromatogram

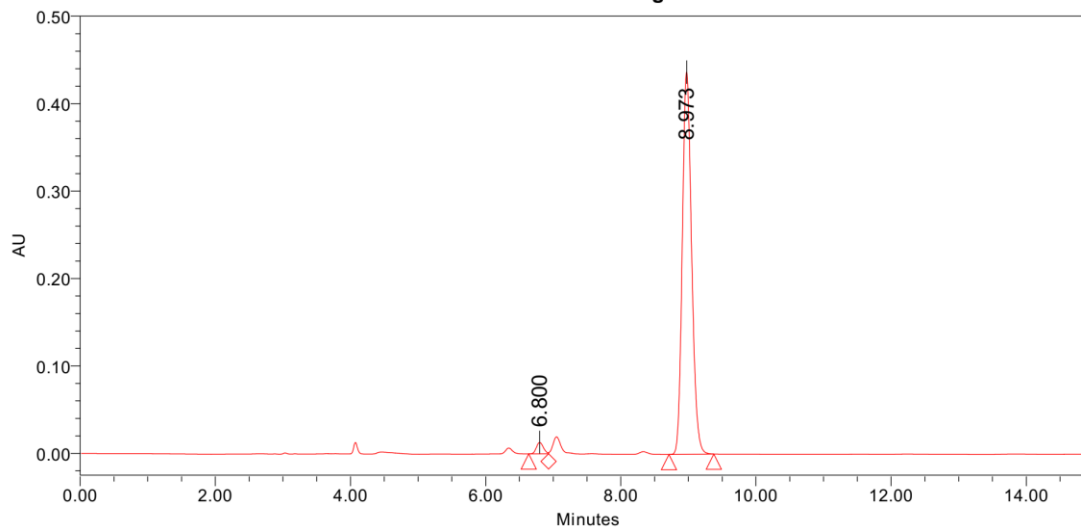

Peak Results

| Name | RT    | Area    | Height | % Area |
|------|-------|---------|--------|--------|
| 1    | 6.800 | 94067   | 13104  | 2.20   |
| 2    | 8.973 | 4175223 | 437161 | 97.80  |

**Supplementary Figure 275.** HPLC Spectra of **62** obtained from *(S,R)*-L1.

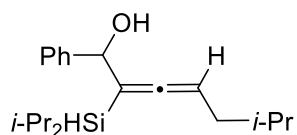

**Figure 4, entry 63**  
 (*R,S*)-L1: 96% ee; (*S,R*)-L1: 94% ee

**Auto-Scaled Chromatogram**

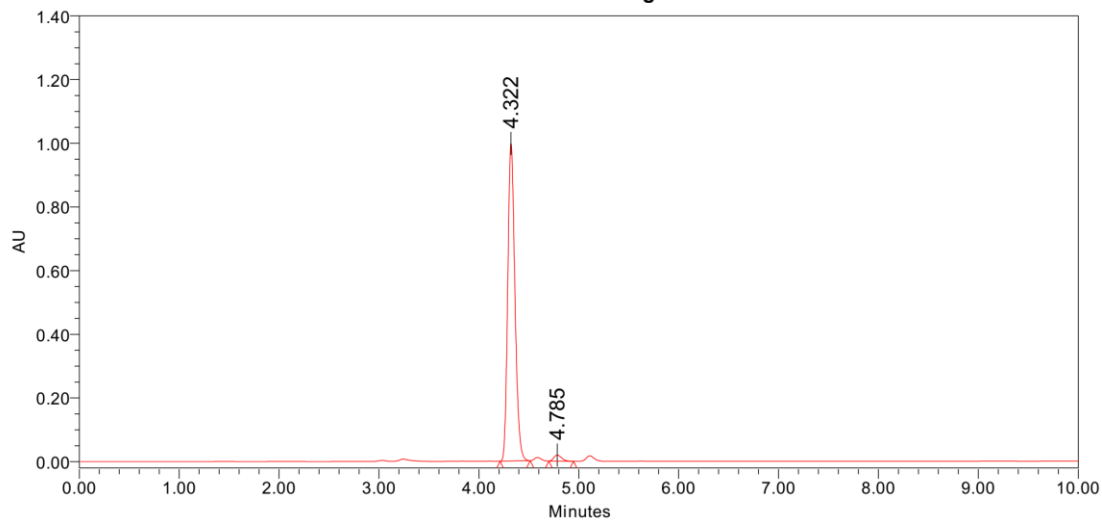

**Peak Results**

| Name | RT    | Area    | Height | % Area |
|------|-------|---------|--------|--------|
| 1    | 4.322 | 4973104 | 997744 | 97.96  |
| 2    | 4.785 | 103519  | 19007  | 2.04   |

**Supplementary Figure 276. HPLC Spectra of 63 obtained from (*R,S*)-L1.**

**Auto-Scaled Chromatogram**

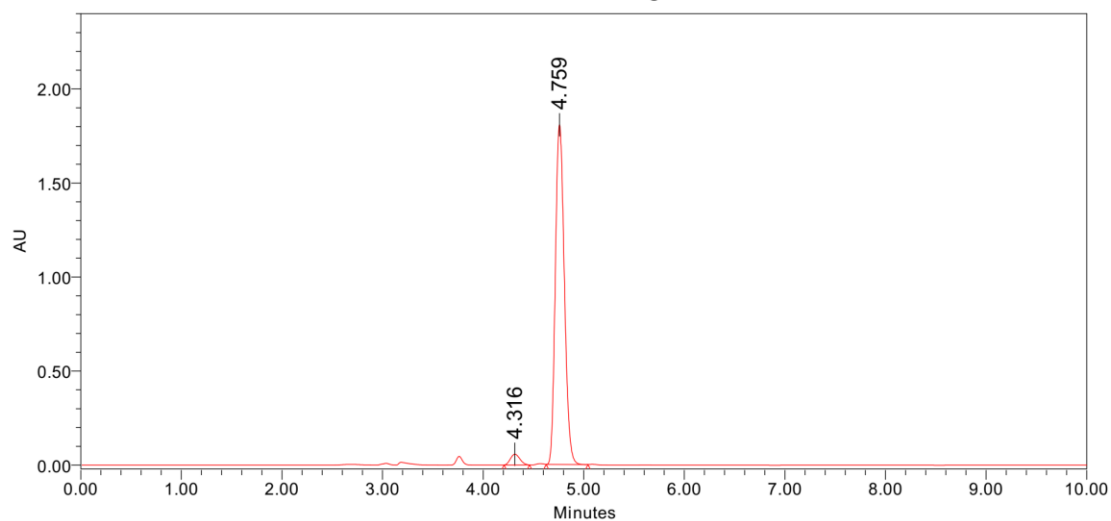

**Peak Results**

| Name | RT    | Area     | Height  | % Area |
|------|-------|----------|---------|--------|
| 1    | 4.316 | 370388   | 57016   | 3.19   |
| 2    | 4.759 | 11233966 | 1806220 | 96.81  |

**Supplementary Figure 277. HPLC Spectra of 63 obtained from (*S,R*)-L1.**

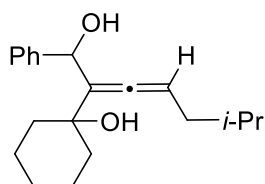

**Figure 4, entry 64**  
 (*R,S*)-L1: 97% ee; (*S,R*)-L1: 97% ee  
**Auto-Scaled Chromatogram**

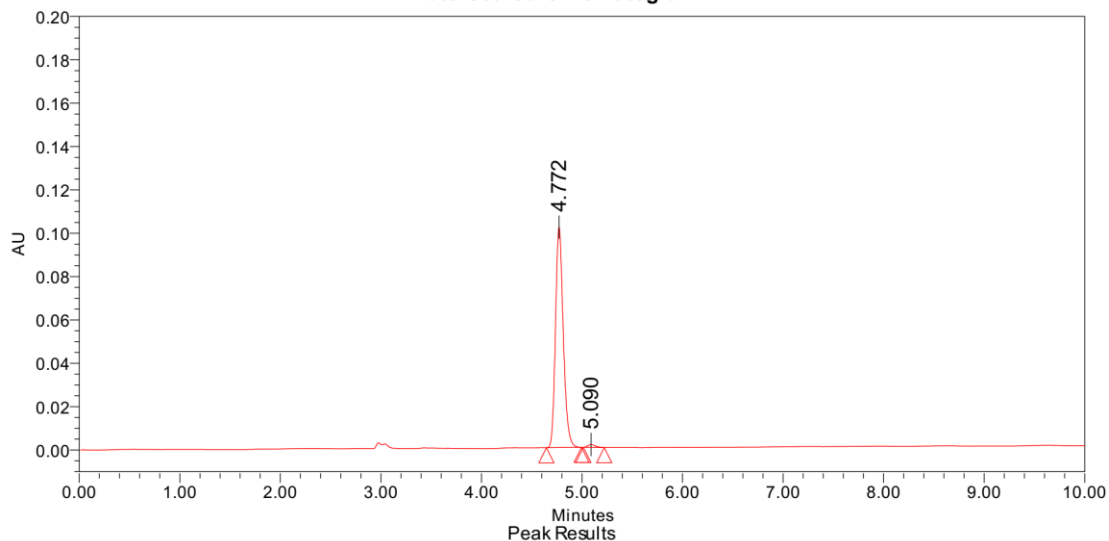

| Peak Results |       |        |        |        |
|--------------|-------|--------|--------|--------|
| Name         | RT    | Area   | Height | % Area |
| 1            | 4.772 | 547074 | 101709 | 98.76  |
| 2            | 5.090 | 6868   | 1297   | 1.24   |

**Supplementary Figure 278. HPLC Spectra of 64 obtained from (*R,S*)-L1.**  
**Auto-Scaled Chromatogram**

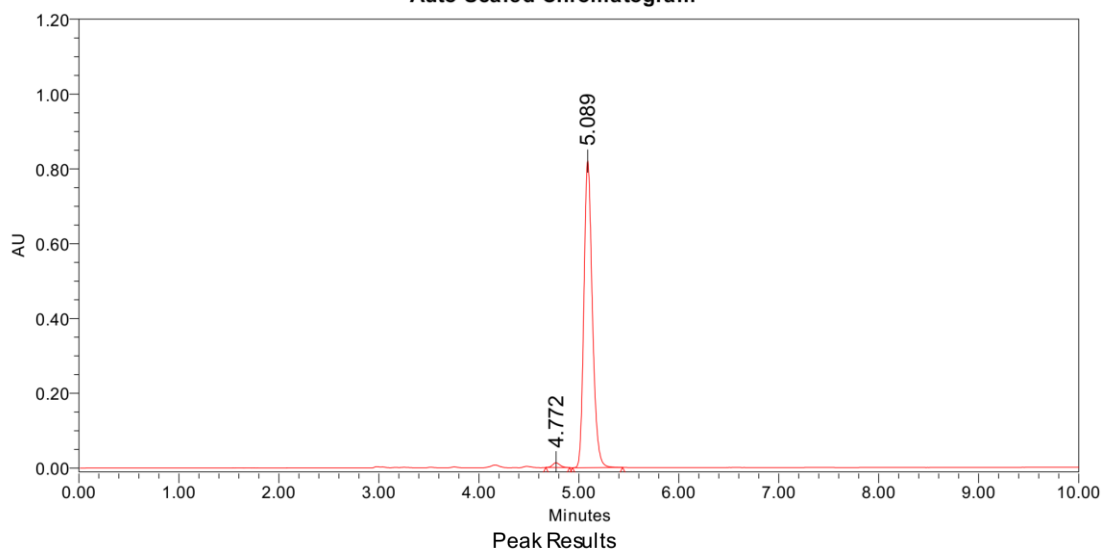

| Peak Results |       |         |        |        |
|--------------|-------|---------|--------|--------|
| Name         | RT    | Area    | Height | % Area |
| 1            | 4.772 | 66496   | 12677  | 1.36   |
| 2            | 5.089 | 4807922 | 820040 | 98.64  |

**Supplementary Figure 279. HPLC Spectra of 64 obtained from (*S,R*)-L1.**

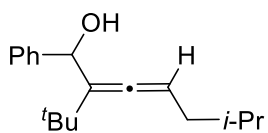

**Figure 4, entry 65**  
 (*R,S*)-L1: 80% ee; (*S,R*)-L1: 78% ee

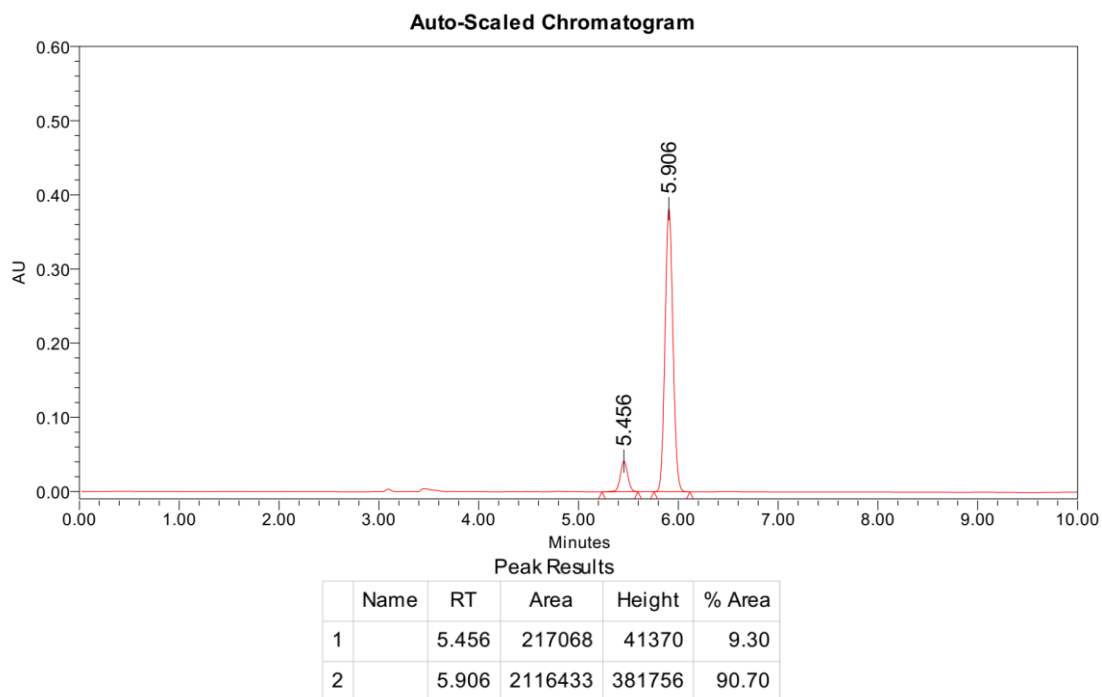

**Supplementary Figure 280.** HPLC Spectra of **65** obtained from (*R,S*)-L1.

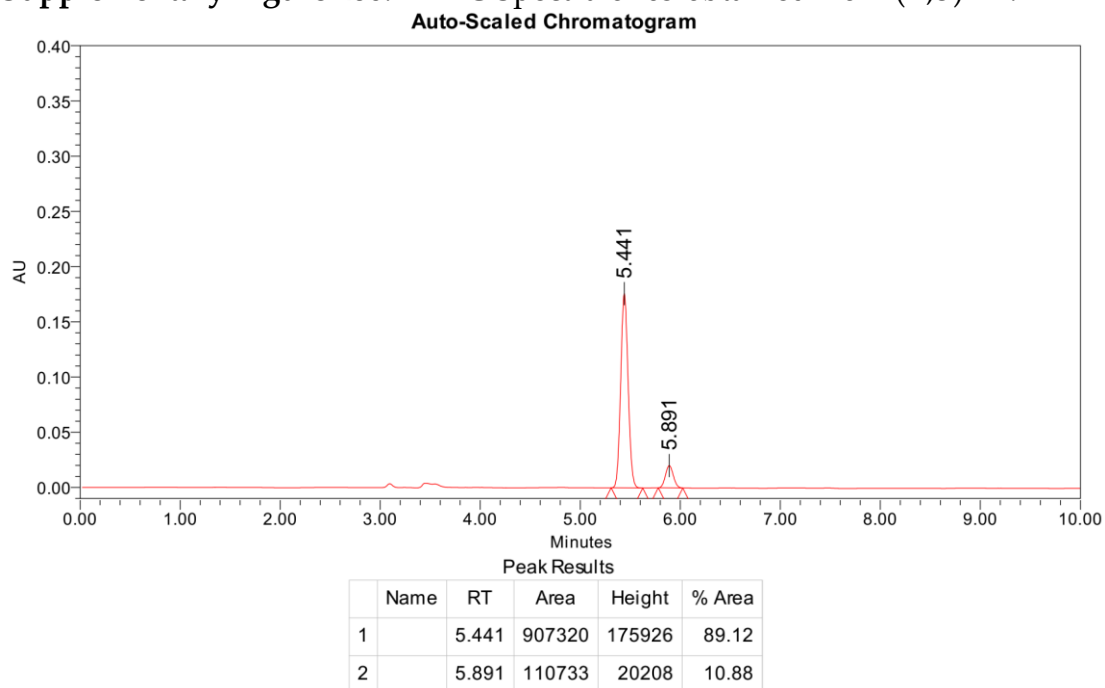

**Supplementary Figure 281.** HPLC Spectra of **65** obtained from (*S,R*)-L1.

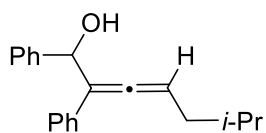

**Figure 4, entry 66**  
*(R,S)*-L1: 98% ee; *(S,R)*-L1: 98% ee

**Auto-Scaled Chromatogram**

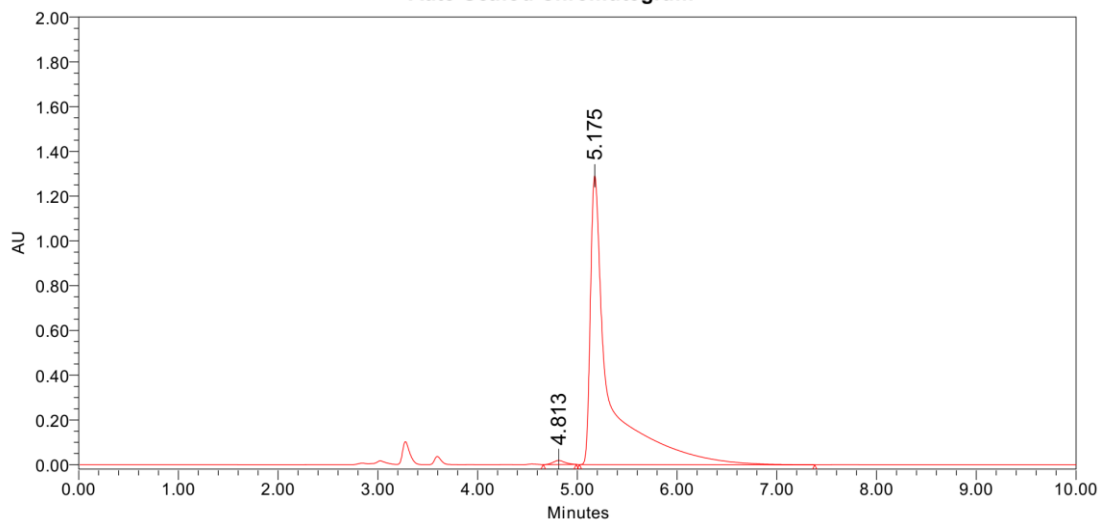

**Peak Results**

| Name | RT    | Area     | Height  | % Area |
|------|-------|----------|---------|--------|
| 1    | 4.813 | 147557   | 18227   | 0.86   |
| 2    | 5.175 | 16914364 | 1290822 | 99.14  |

**Supplementary Figure 282. HPLC Spectra of 66 obtained from *(R,S)*-L1.**

**Auto-Scaled Chromatogram**

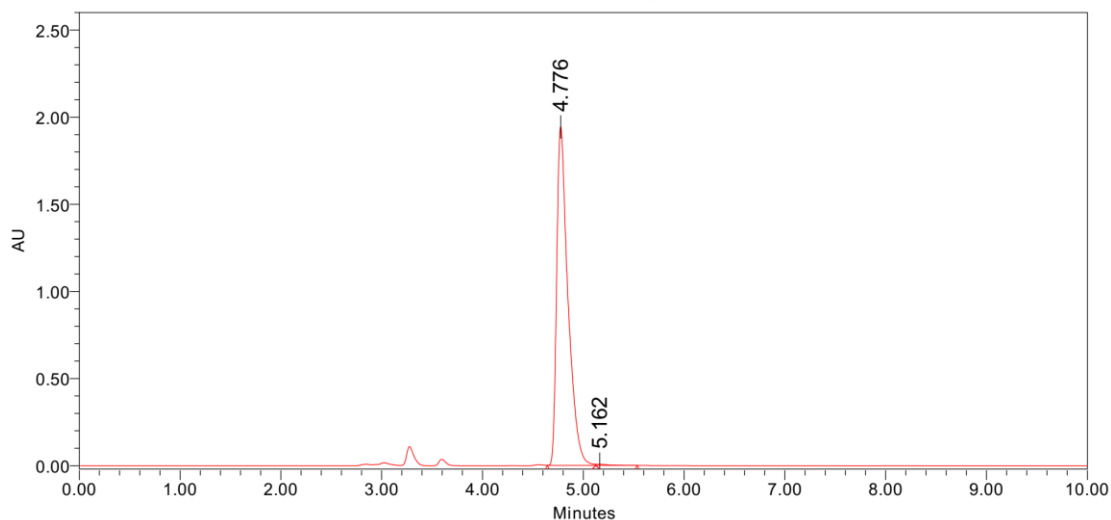

**Peak Results**

| Name | RT    | Area     | Height  | % Area |
|------|-------|----------|---------|--------|
| 1    | 4.776 | 15152840 | 1943898 | 99.62  |
| 2    | 5.162 | 58420    | 6788    | 0.38   |

**Supplementary Figure 283. HPLC Spectra of 66 obtained from *(S,R)*-L1.**



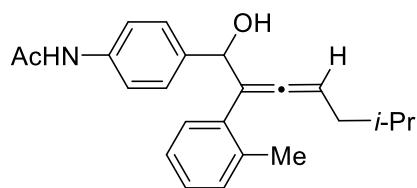

**Scheme 2, entry 67**  
 (*R,S*)-L1: 96% ee; (*S,R*)-L1: 95% ee

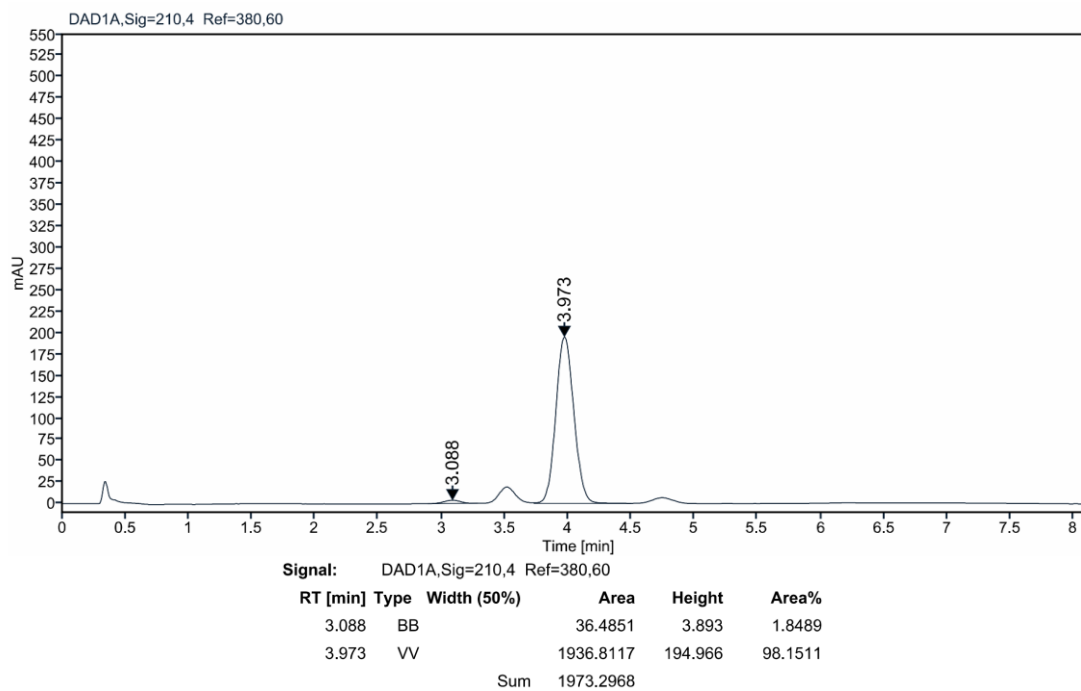

**Supplementary Figure 284.** SFC Spectra of **67** obtained from (*R,S*)-L1.

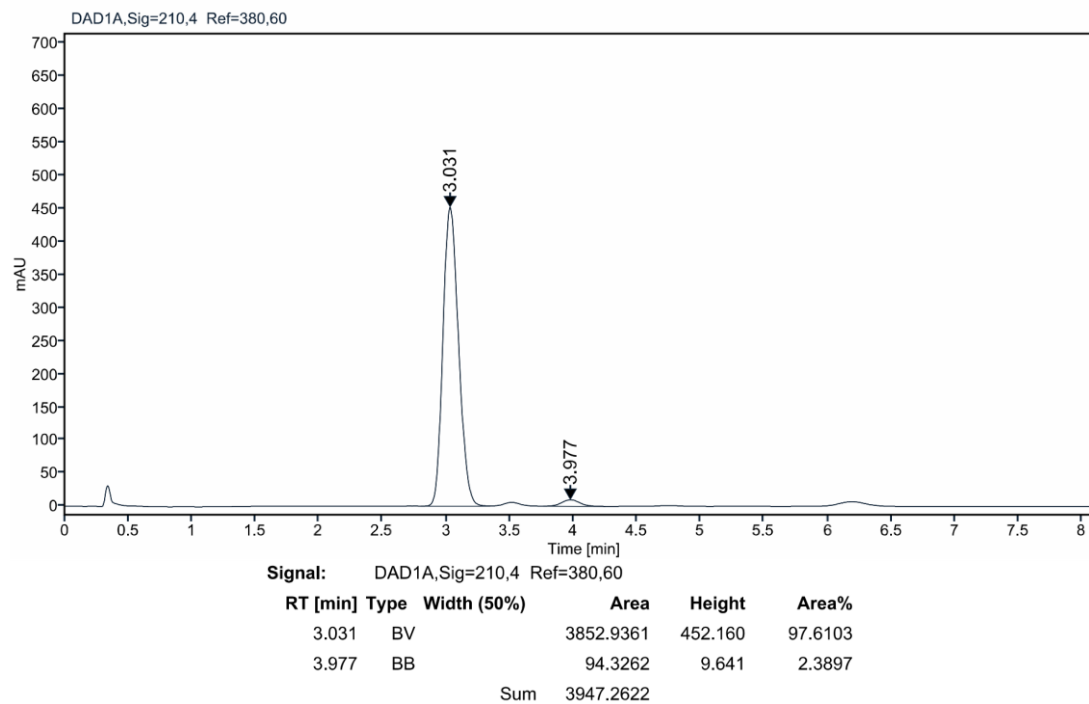

**Supplementary Figure 285.** SFC Spectra of **67** obtained from (*S,R*)-L1.

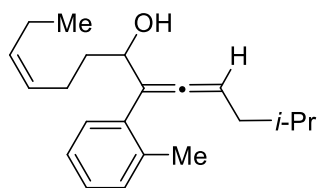

**Figure 4, entry 68**  
 (*R,S*)-L1: 93% ee; (*S,R*)-L1: 95% ee  
**Auto-Scaled Chromatogram**

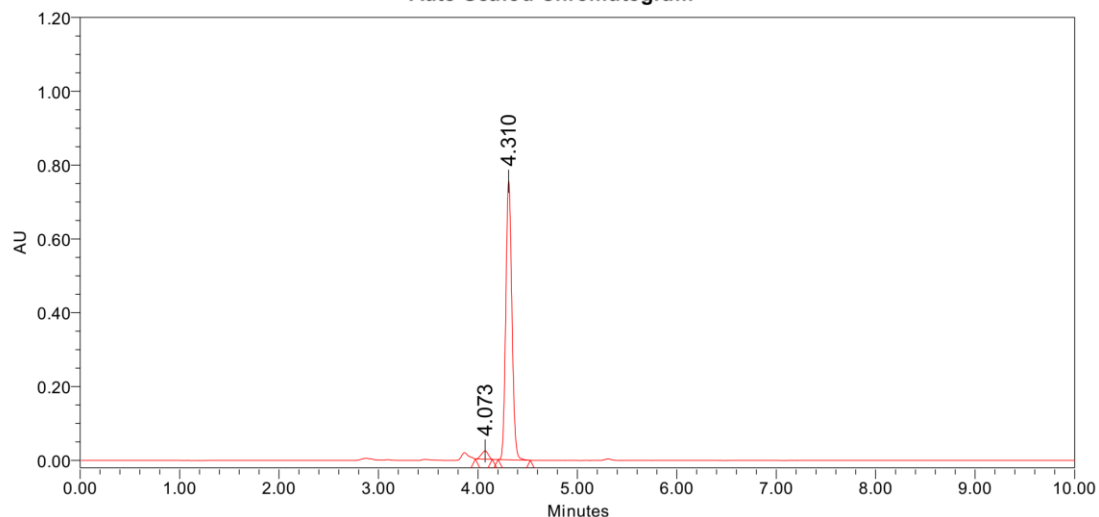

Peak Results

| Name | RT    | Area    | Height | % Area |
|------|-------|---------|--------|--------|
| 1    | 4.073 | 106887  | 22501  | 3.22   |
| 2    | 4.310 | 3209338 | 754873 | 96.78  |

**Supplementary Figure 286. HPLC Spectra of 68 obtained from (*R,S*)-L1.**  
**Auto-Scaled Chromatogram**

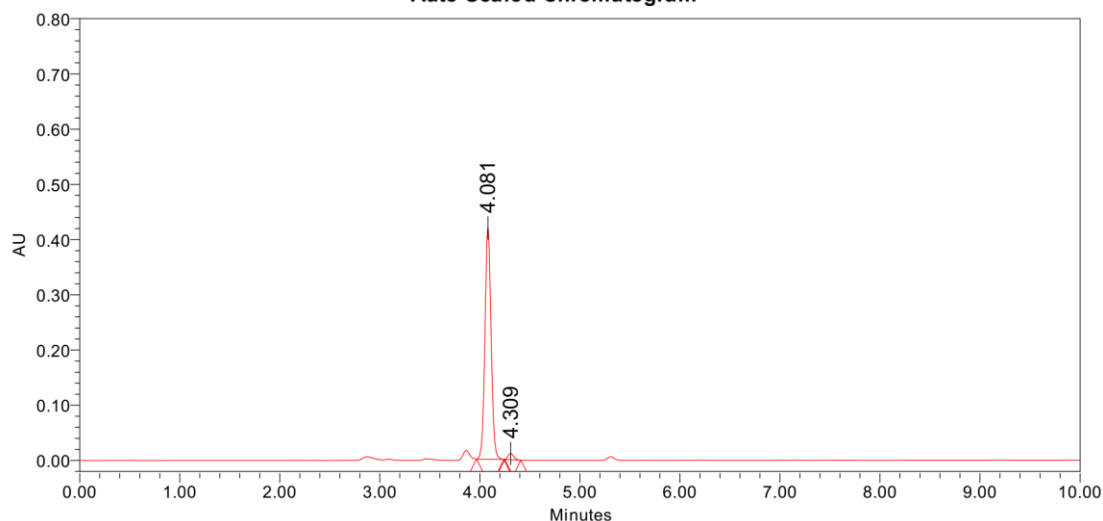

Peak Results

| Name | RT    | Area    | Height | % Area |
|------|-------|---------|--------|--------|
| 1    | 4.081 | 1791550 | 419035 | 97.63  |
| 2    | 4.309 | 43574   | 11102  | 2.37   |

**Supplementary Figure 287. HPLC Spectra of 68 obtained from (*S,R*)-L1.**

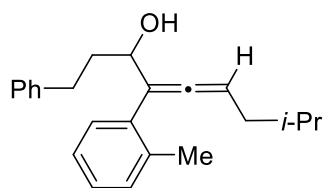

**Figure 4, entry 69**  
*(R,S)*-L1: 94% ee; *(S,R)*-L1: 94% ee  
**Auto-Scaled Chromatogram**

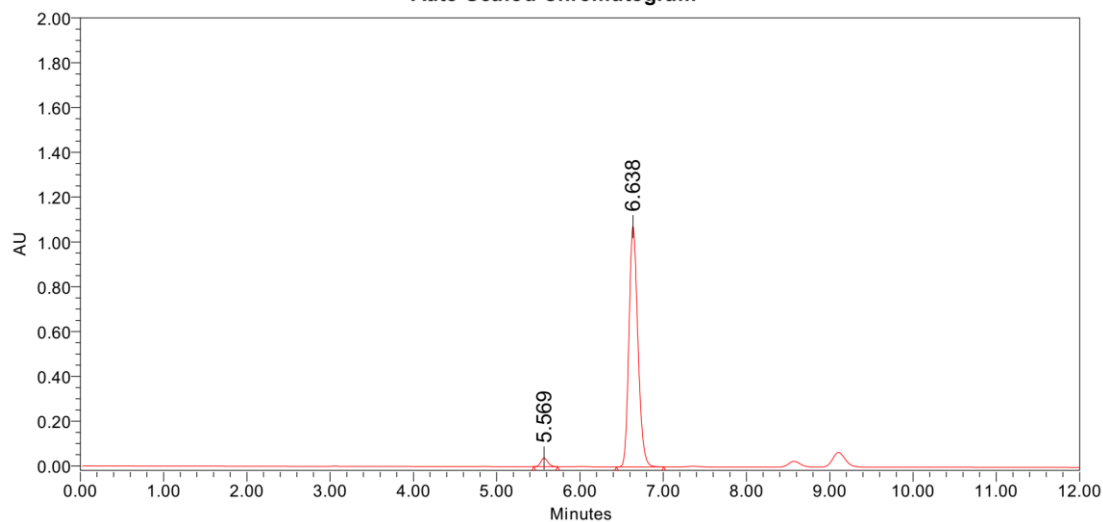

**Peak Results**

|   | Name | RT    | Area    | Height  | % Area |
|---|------|-------|---------|---------|--------|
| 1 |      | 5.569 | 230162  | 38815   | 2.80   |
| 2 |      | 6.638 | 7998301 | 1073022 | 97.20  |

**Supplementary Figure 288. HPLC Spectra of 69 obtained from *(R,S)*-L1.**

**Auto-Scaled Chromatogram**

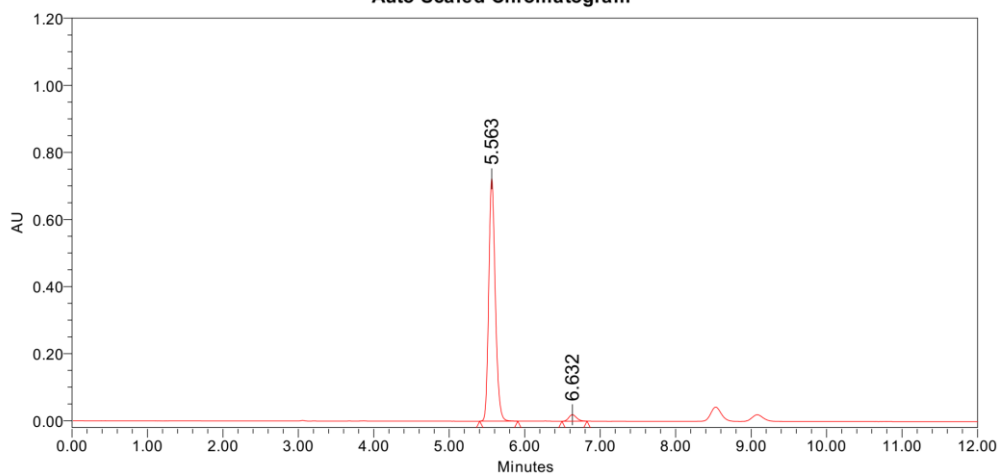

**Peak Results**

|   | Name | RT    | Area    | Height | % Area |
|---|------|-------|---------|--------|--------|
| 1 |      | 5.563 | 4352879 | 722381 | 96.93  |
| 2 |      | 6.632 | 137832  | 19339  | 3.07   |

**Supplementary Figure 289. HPLC Spectra of 69 obtained from *(S,R)*-L1.**

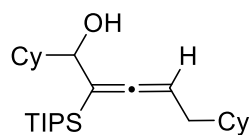

**Figure 5a, entry 71**  
*(R,S)*-L1: 97% ee; *(S,R)*-L1: 96% ee

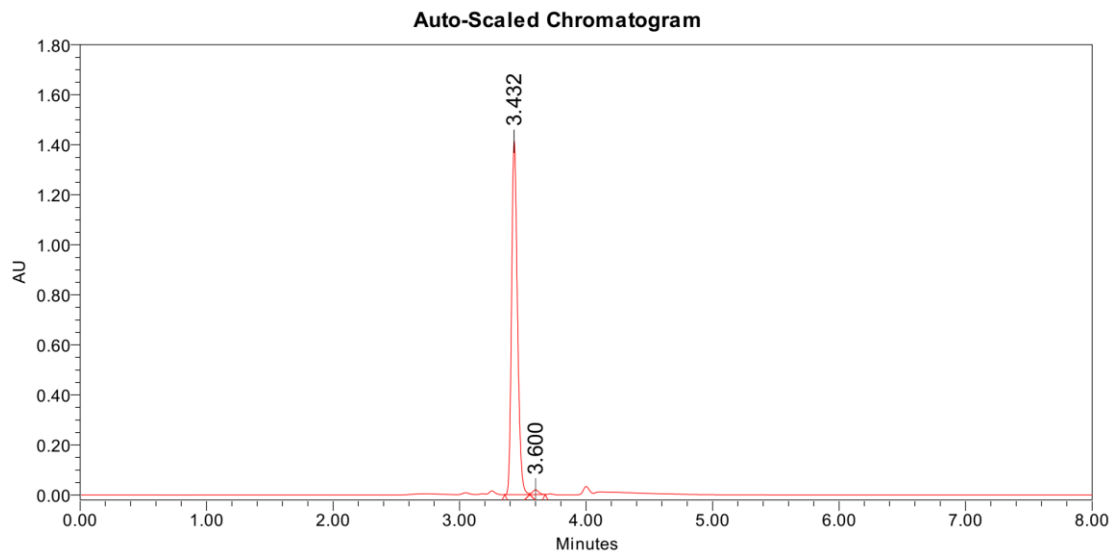

**Peak Results**

| Name | RT    | Area    | Height  | % Area |
|------|-------|---------|---------|--------|
| 1    | 3.432 | 4584421 | 1413372 | 98.65  |
| 2    | 3.600 | 62939   | 18992   | 1.35   |

**Supplementary Figure 290.** HPLC Spectra of **71** obtained from *(R,S)*-L1.

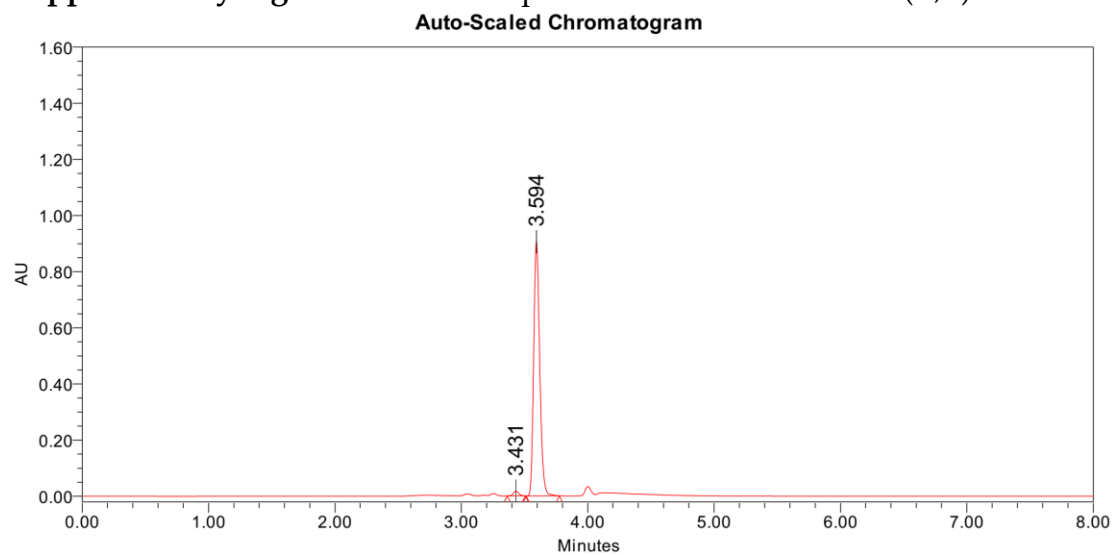

**Peak Results**

| Name | RT    | Area    | Height | % Area |
|------|-------|---------|--------|--------|
| 1    | 3.431 | 52077   | 17030  | 1.70   |
| 2    | 3.594 | 3011333 | 906575 | 98.30  |

**Supplementary Figure 291.** HPLC Spectra of **71** obtained from *(S,R)*-L1.

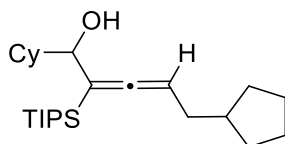

**Figure 5a, entry 72**  
 (*R,S*)-L1: 97% ee; (*S,R*)-L1: 98% ee

**Auto-Scaled Chromatogram**

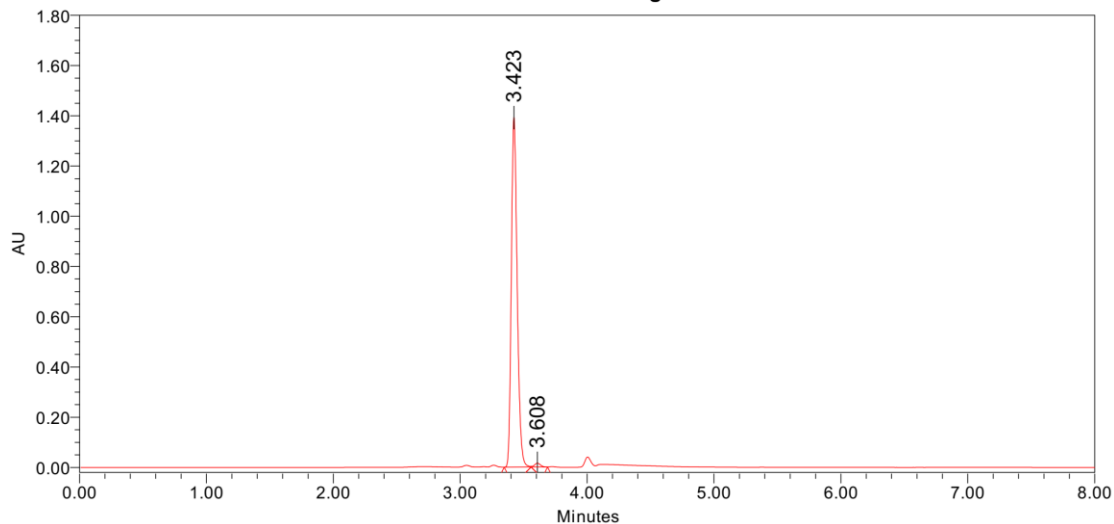

**Peak Results**

| Name | RT    | Area    | Height  | % Area |
|------|-------|---------|---------|--------|
| 1    | 3.423 | 4489848 | 1392862 | 98.88  |
| 2    | 3.608 | 50732   | 15482   | 1.12   |

**Supplementary Figure 292. HPLC Spectra of 72 obtained from (*R,S*)-L1.**

**Auto-Scaled Chromatogram**

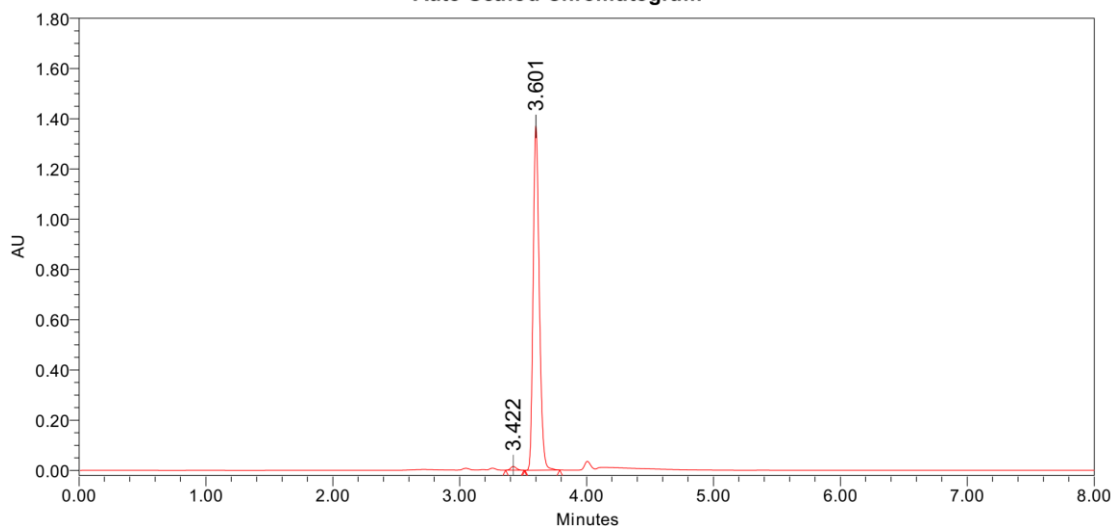

**Peak Results**

| Name | RT    | Area    | Height  | % Area |
|------|-------|---------|---------|--------|
| 1    | 3.422 | 45631   | 14853   | 0.98   |
| 2    | 3.601 | 4623912 | 1371335 | 99.02  |

**Supplementary Figure 293. HPLC Spectra of 72 obtained from (*S,R*)-L1.**

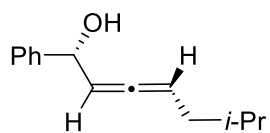

**Figure 5c, 73**  
Auto-Scaled Chromatogram

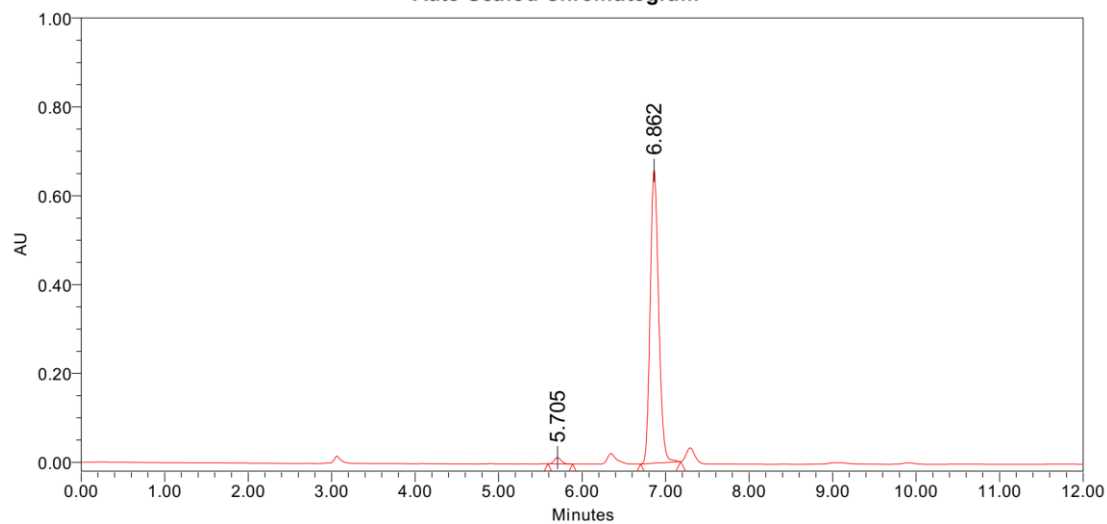

Peak Results

| Name | RT    | Area    | Height | % Area |
|------|-------|---------|--------|--------|
| 1    | 5.705 | 81074   | 14081  | 1.71   |
| 2    | 6.862 | 4649264 | 659656 | 98.29  |

**Supplementary Figure 294. HPLC Spectra of 73 obtained from (R,S)-L1.**  
Auto-Scaled Chromatogram

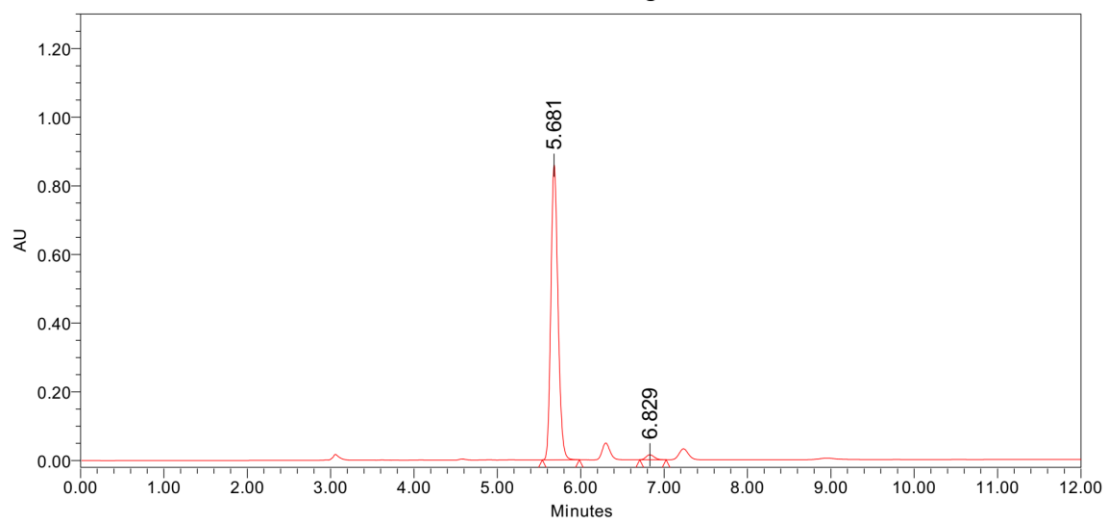

Peak Results

| Name | RT    | Area    | Height | % Area |
|------|-------|---------|--------|--------|
| 1    | 5.681 | 5101740 | 858982 | 98.08  |
| 2    | 6.829 | 100009  | 14603  | 1.92   |

**Supplementary Figure 295. HPLC Spectra of 73 obtained from (S,R)-L1.**

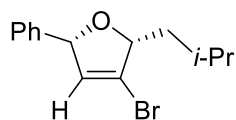

**Figure 5c, 74**

**Auto-Scaled Chromatogram**

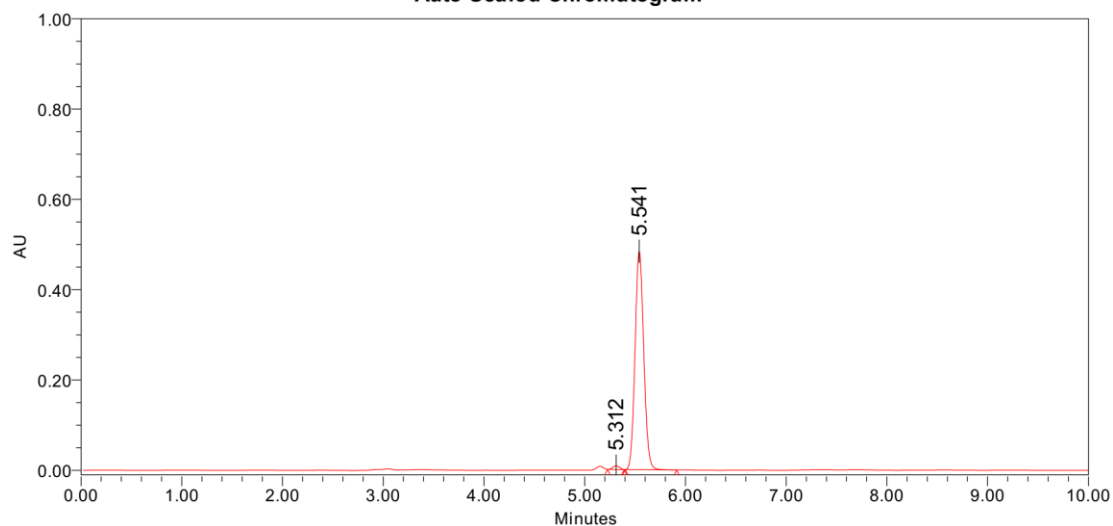

| Peak Results |       |         |        |        |
|--------------|-------|---------|--------|--------|
| Name         | RT    | Area    | Height | % Area |
| 1            | 5.312 | 37977   | 7976   | 1.29   |
| 2            | 5.541 | 2916164 | 483787 | 98.71  |

**Supplementary Figure 296. HPLC Spectra of 74 obtained from (R,S)-L1.**

**Auto-Scaled Chromatogram**

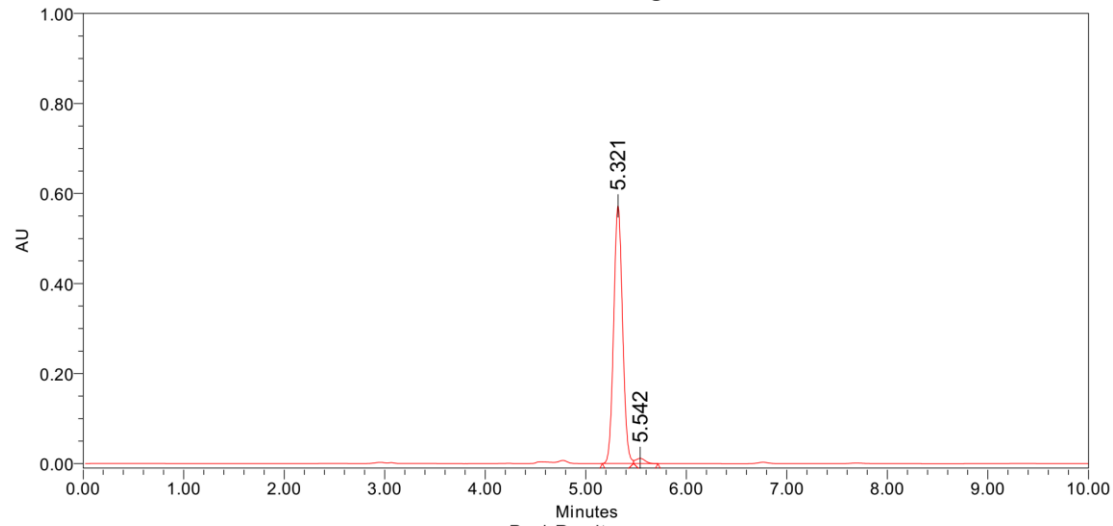

| Peak Results |       |         |        |        |
|--------------|-------|---------|--------|--------|
| Name         | RT    | Area    | Height | % Area |
| 1            | 5.321 | 3508285 | 572384 | 97.88  |
| 2            | 5.542 | 76141   | 11564  | 2.12   |

**Supplementary Figure 297. HPLC Spectra of 74 obtained from (S,R)-L1.**

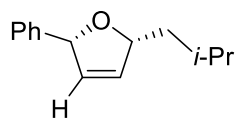

**Figure 5c, 75**

**Auto-Scaled Chromatogram**

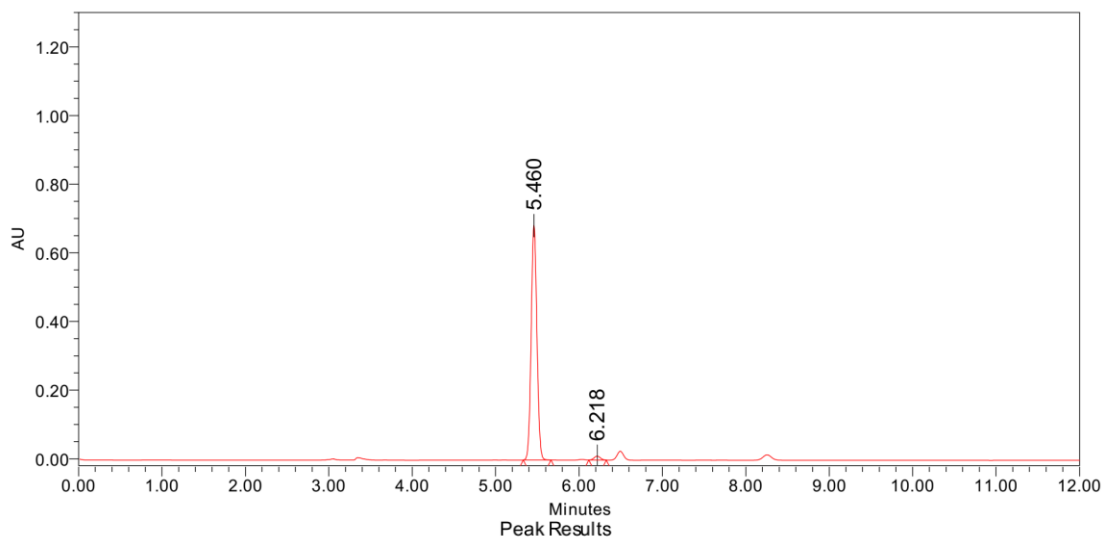

| Peak Results |       |         |        |        |
|--------------|-------|---------|--------|--------|
| Name         | RT    | Area    | Height | % Area |
| 1            | 5.460 | 3258859 | 683227 | 98.23  |
| 2            | 6.218 | 58627   | 11229  | 1.77   |

**Supplementary Figure 298. HPLC Spectra of 75 obtained from (R,S)-L1.**

**Auto-Scaled Chromatogram**

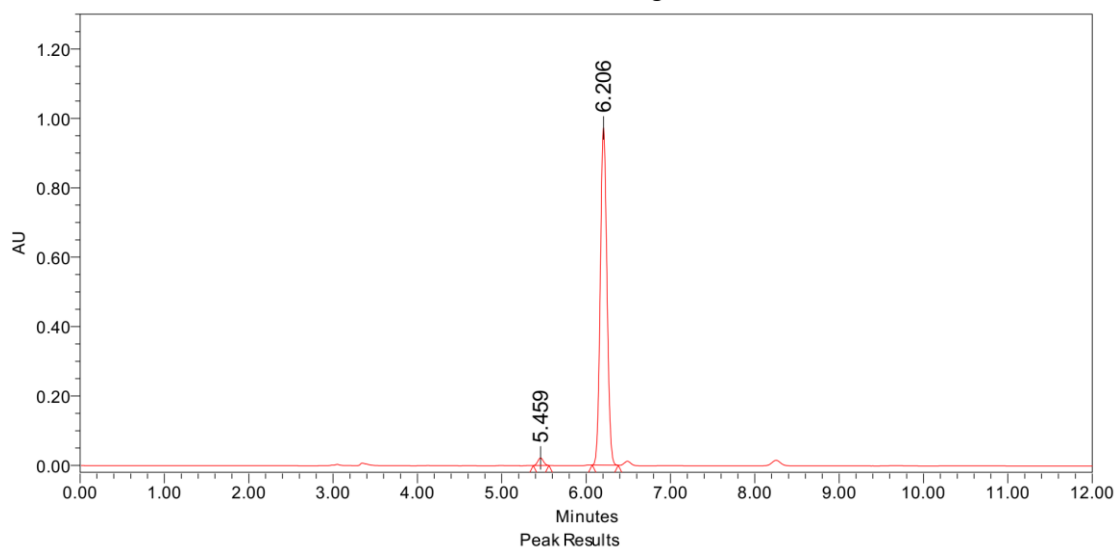

| Peak Results |       |         |        |        |
|--------------|-------|---------|--------|--------|
| Name         | RT    | Area    | Height | % Area |
| 1            | 5.459 | 100916  | 21905  | 1.86   |
| 2            | 6.206 | 5310553 | 972431 | 98.14  |

**Supplementary Figure 299. HPLC Spectra of 75 obtained from (S,R)-L1.**



## II Supplementary References

- (1) Nolin, K. A.; Ahn, R. W.; Kobayashi, Y.; Kennedy-Smith, J. J.; Toste, F. D.; Enantioselective Reduction of Ketones and Imines Catalyzed by (CN-Box)Re<sup>V</sup>-Oxo Complexes. *Chem. Eur. J.* **2010**, *16*, 9555.
- (2) Bai, Z.; Zhang, H.; Wang, H.; Yu, H.; Chen, G.; He, G.; Enantioselective Alkylamination of Unactivated Alkenes under Copper Catalysis. *J. Am. Chem. Soc.* **2021**, *143*, 1195.
- (3) Cheng, J.-K.; Loh, T.-P.; Copper- and Cobalt-Catalyzed Direct Coupling of sp<sup>3</sup>  $\alpha$ -Carbon of Alcohols with Alkenes and Hydroperoxides. *J. Am. Chem. Soc.* **2015**, *137*, 42.
- (4) Li, C.; Wang, J.; Barton, L. M.; Yu, S.; Tian, M.; Peters, D. S.; Kumar, M.; Yu, A. W.; Johnson, K. A.; Chatterjee, A. K.; Yan, M.; Baran, P. S.; Decarboxylative Borylation. *Science* **2017**, *356*, 1045.
- (5) Xie, Q.; Dong, G.; Programmable Ether Synthesis Enabled by Oxa-Matteson Reaction. *J. Am. Chem. Soc.* **2022**, *144*, 8498.
- (6) Cismesia, M. A.; Yonn, T. P.; Characterizing Chain Processes in Visible Light Photoredox Catalysis. *Chem. Sci.* **2015**, *6*, 5426.
- (7) Dolomanov, O. V.; Bourhis, L. J.; Gildea, R. J.; Howard, J. A. K.; Puschmann, H., OLEX2: a Complete Structure Solution, Refinement, and Analysis Program. *J. Appl. Cryst.* **2009**, *42*, 339.
- (8) Sheldrick, G., SHELXT - Integrated Space-Group and Crystal-Structure Determination. *Acta Cryst. A* **2015**, *71*, 3.
- (9) Sheldrick, G., Crystal Structure Refinement with SHELXL. *Acta Cryst. C* **2015**, *71*, 3.
